# Supplementary material for: An adipocyte-endothelial framework to identify molecular signatures of metabolic vulnerability in obesity
Source: Research Square preprint supplement (doi:10.21203/rs.3.rs-9485802/v1), 2026-04-23

**A**

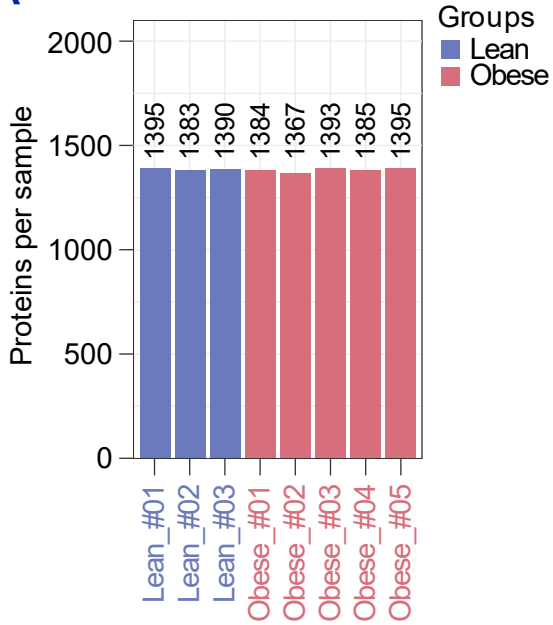

**B**

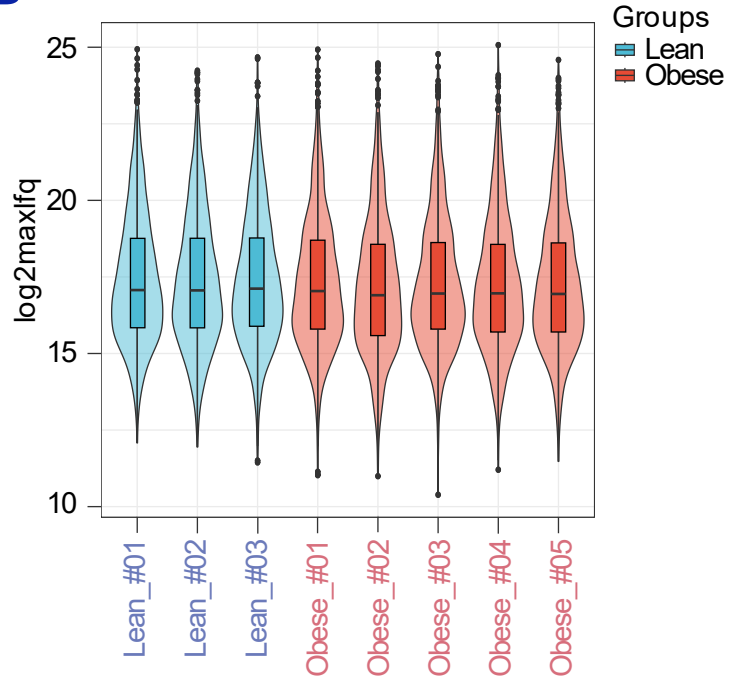

**C**

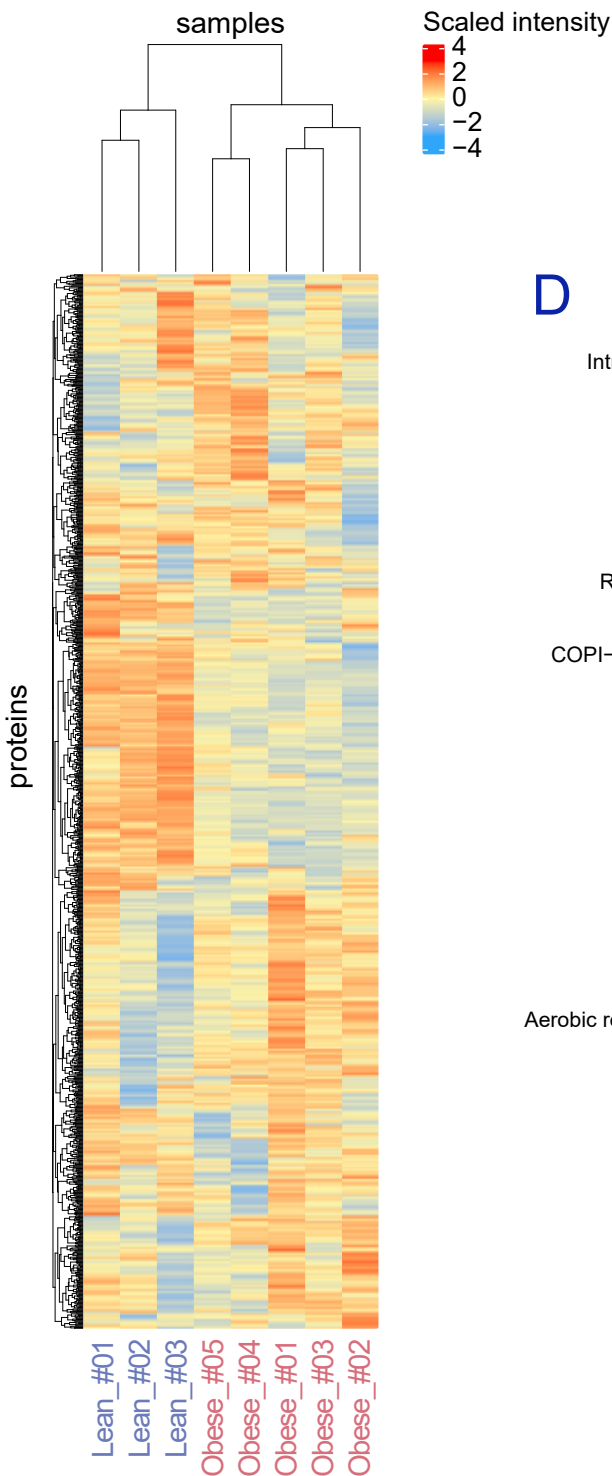

**D**

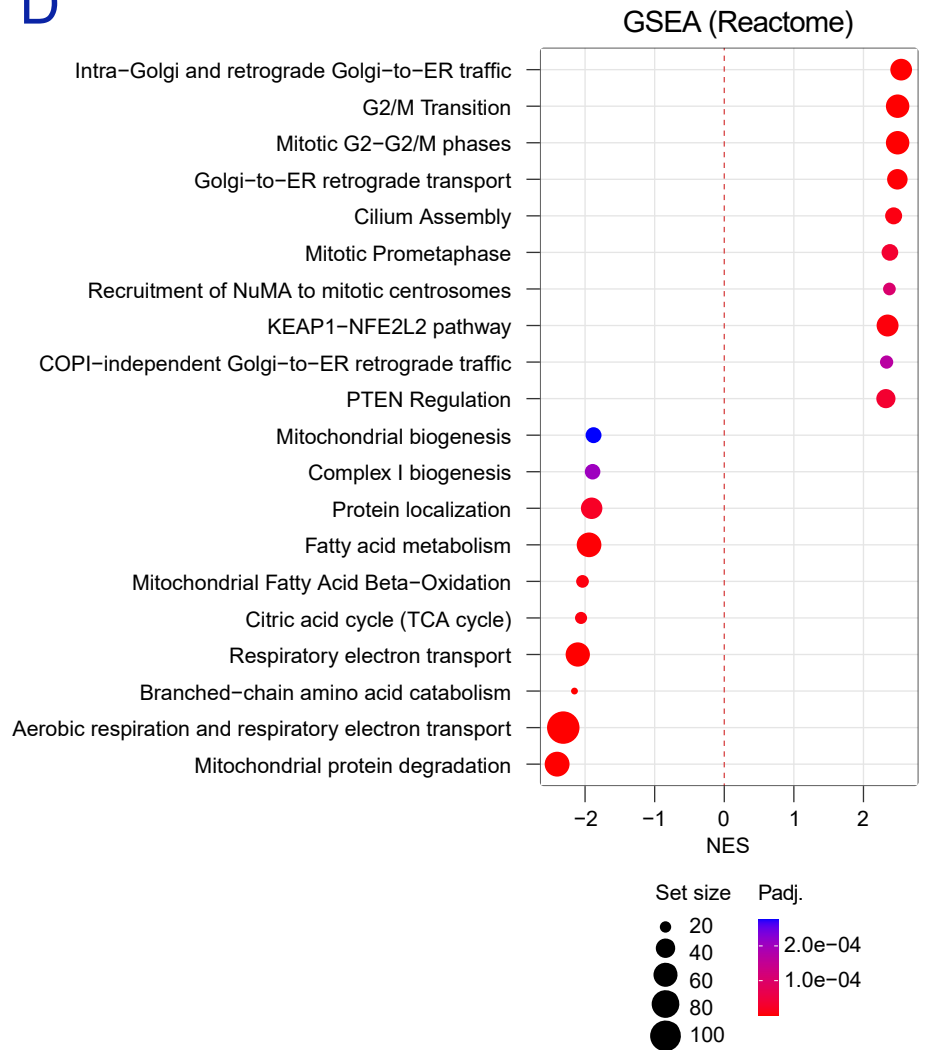

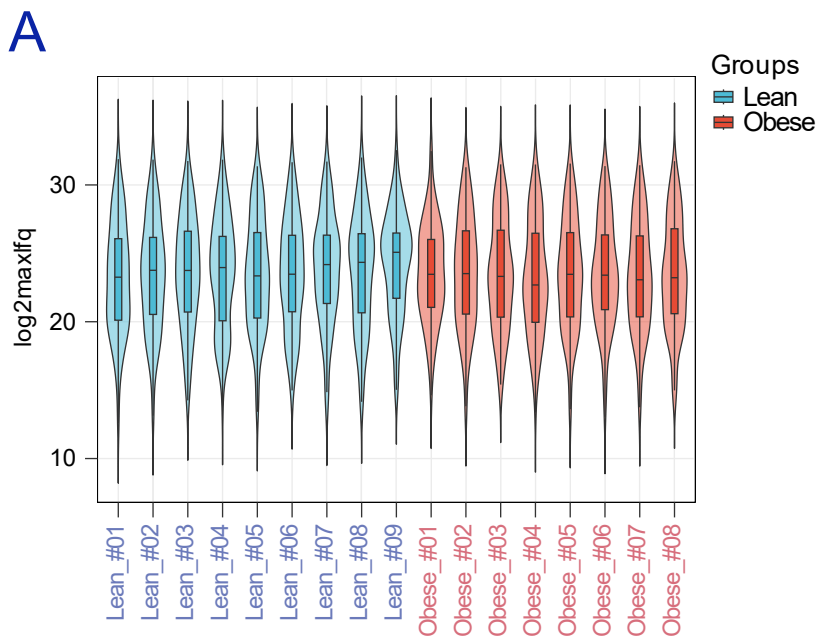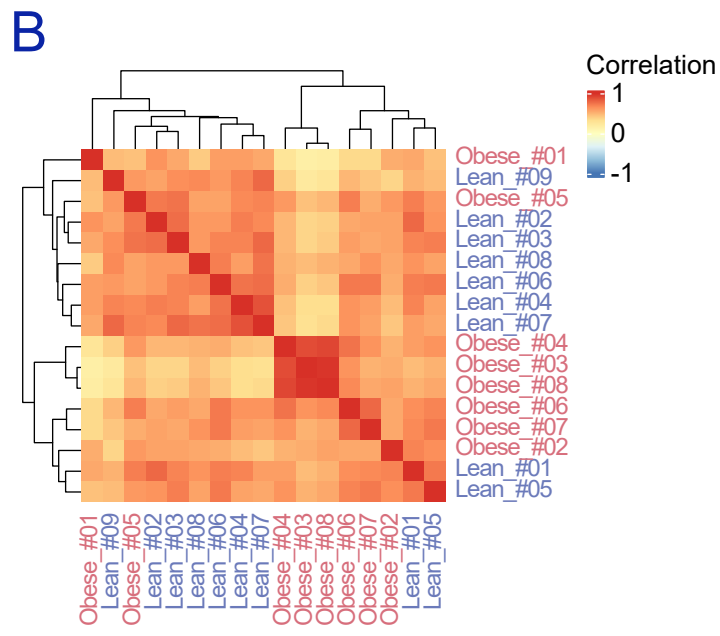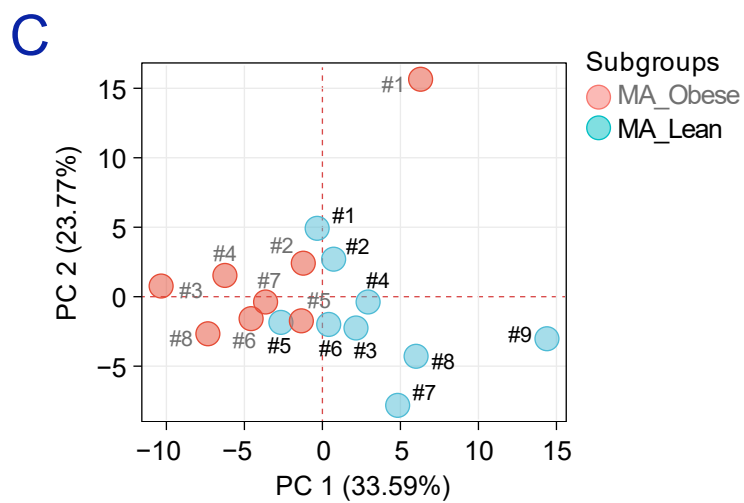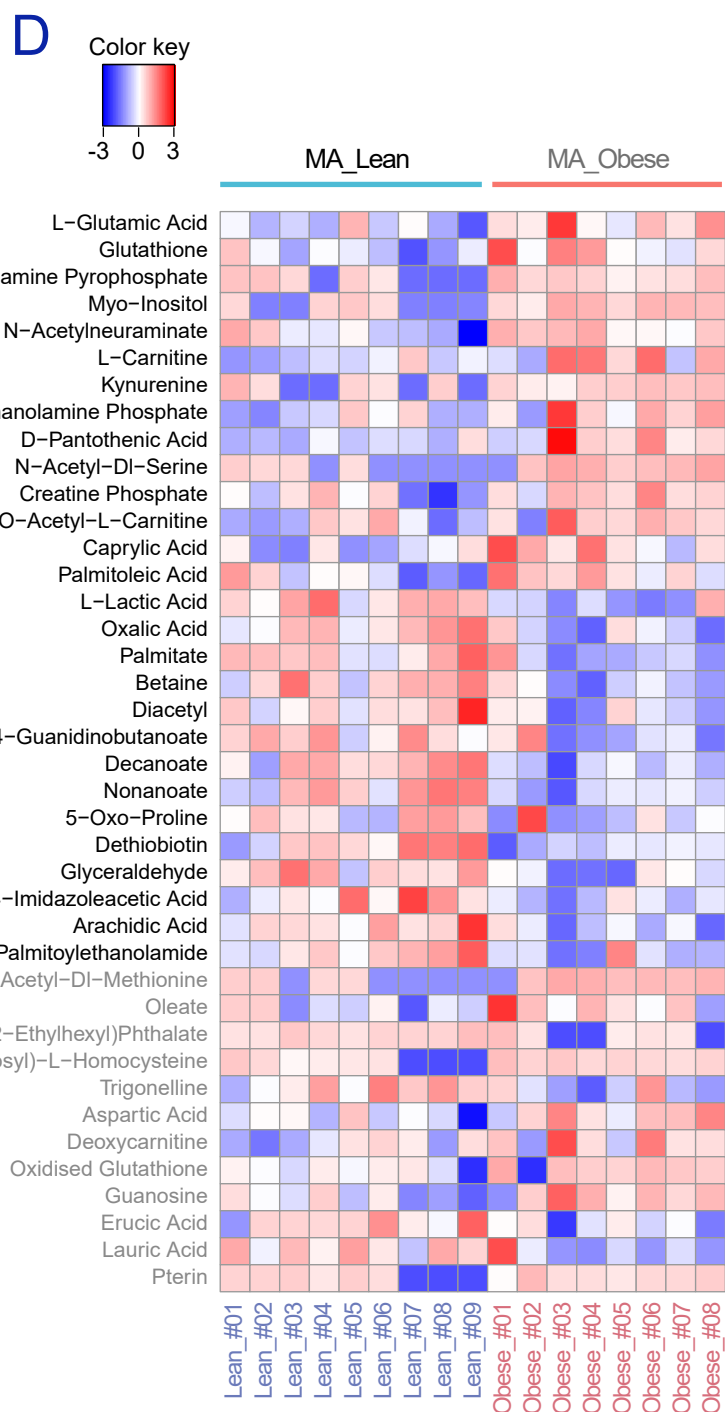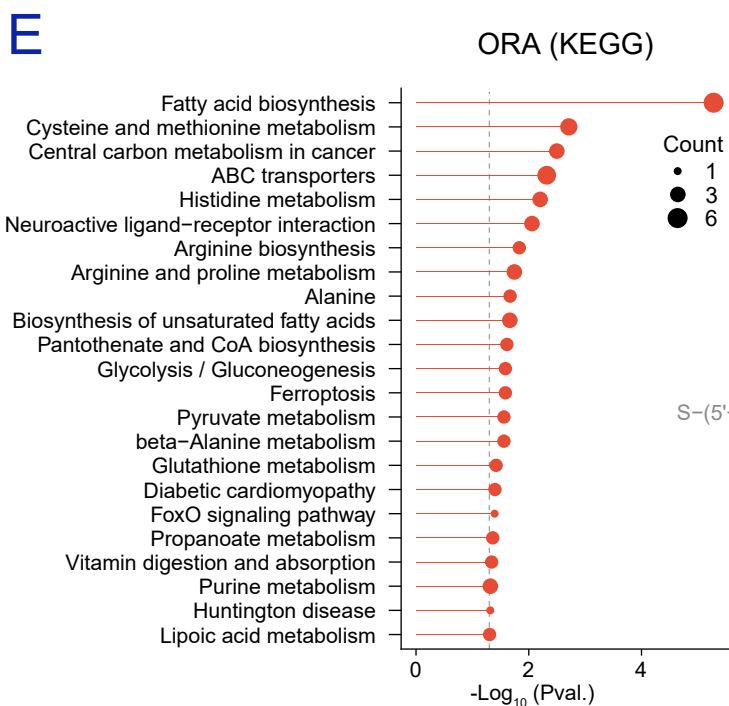

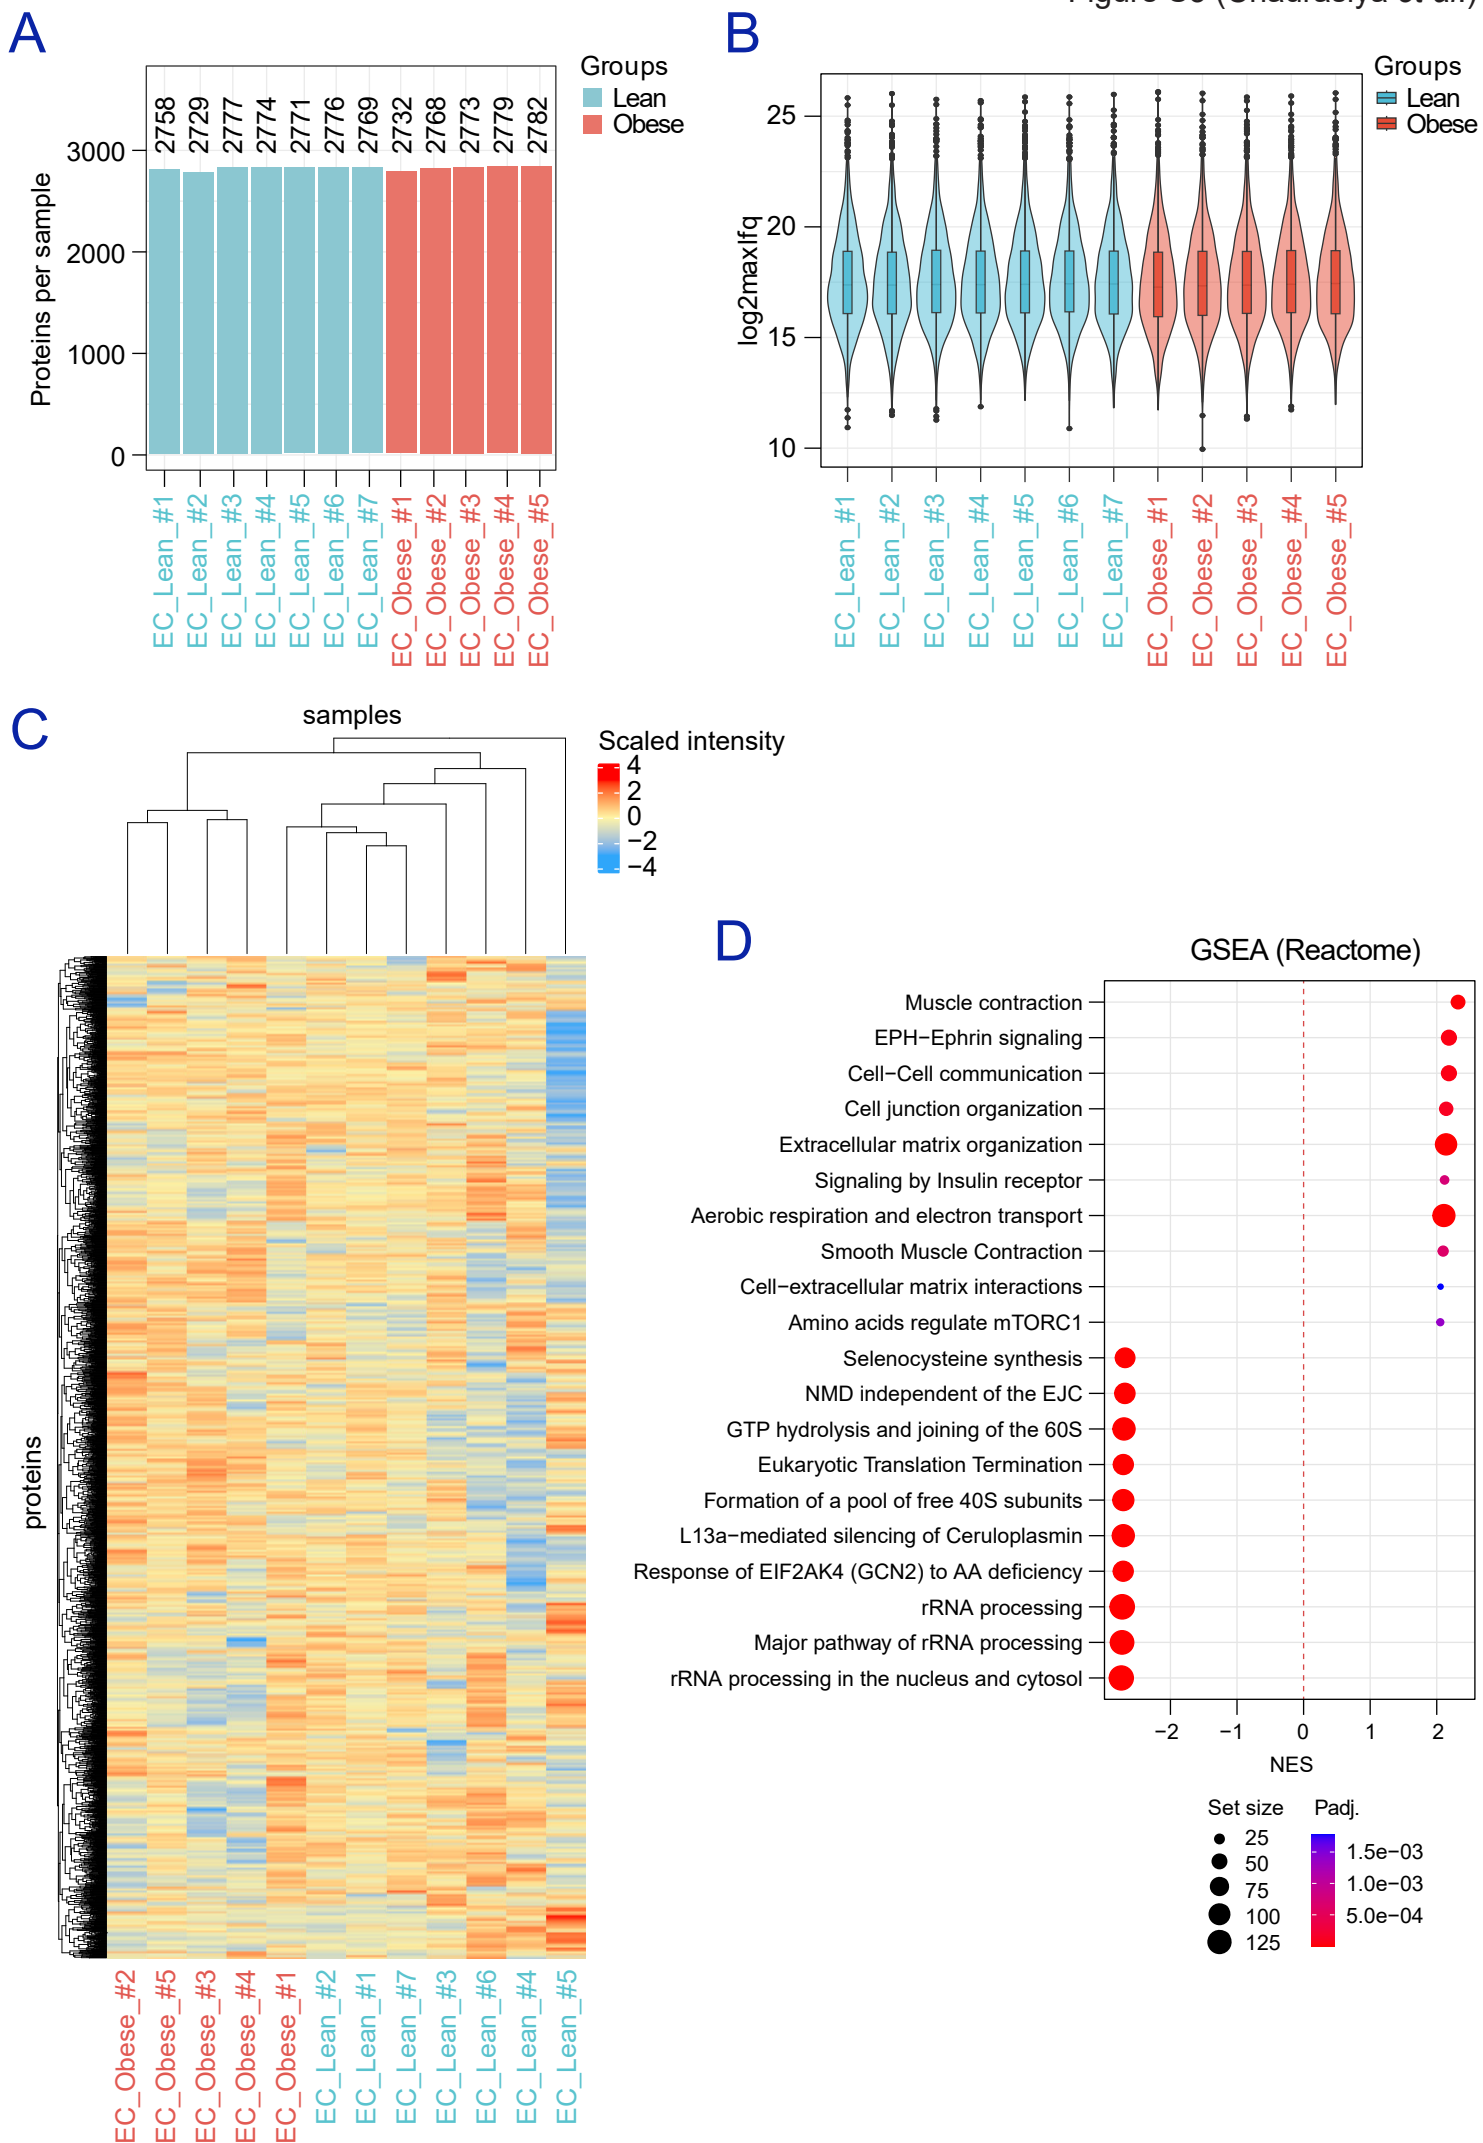

**A**

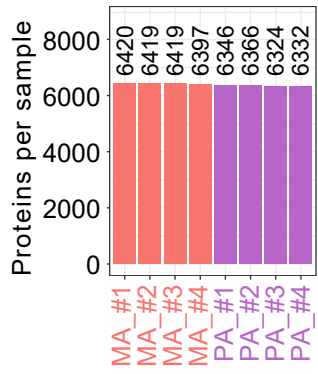

**B**

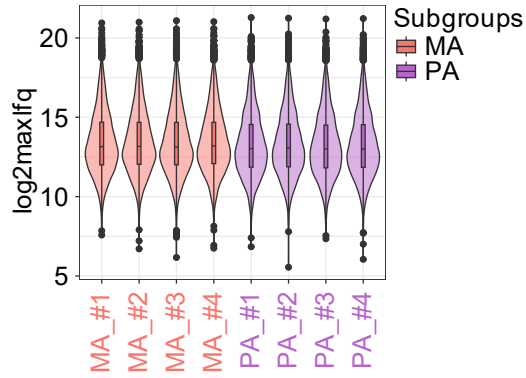

**C**

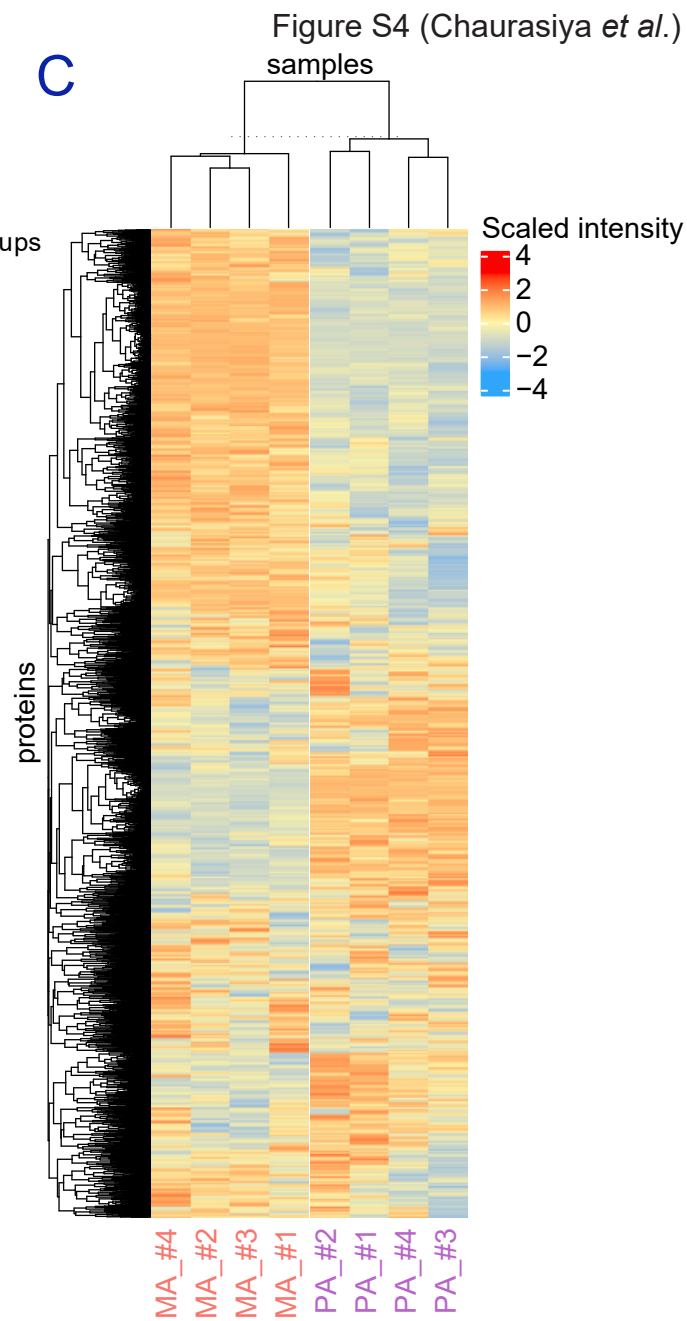

**D**

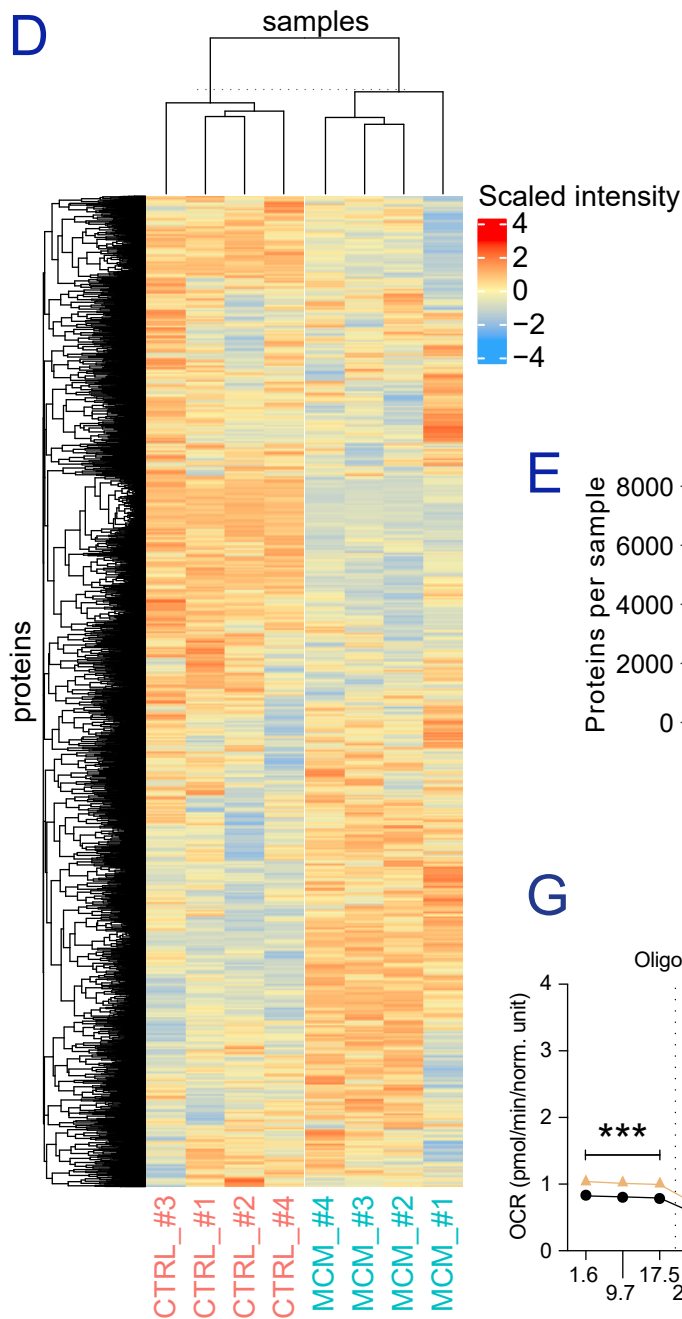

**E**

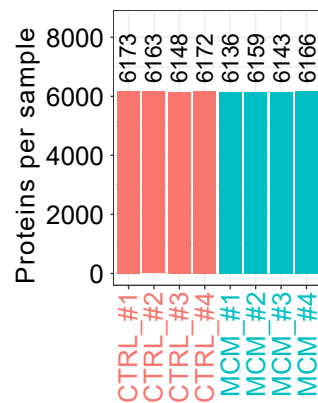

**F**

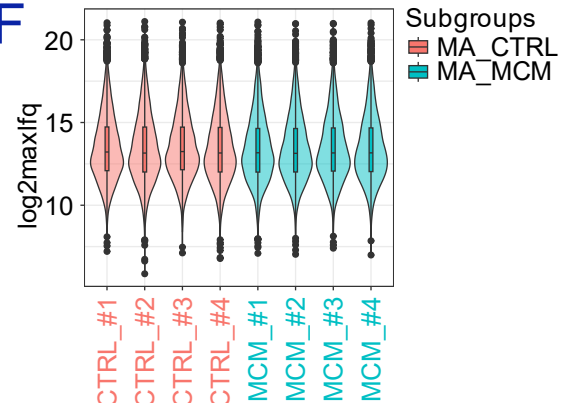

**G**

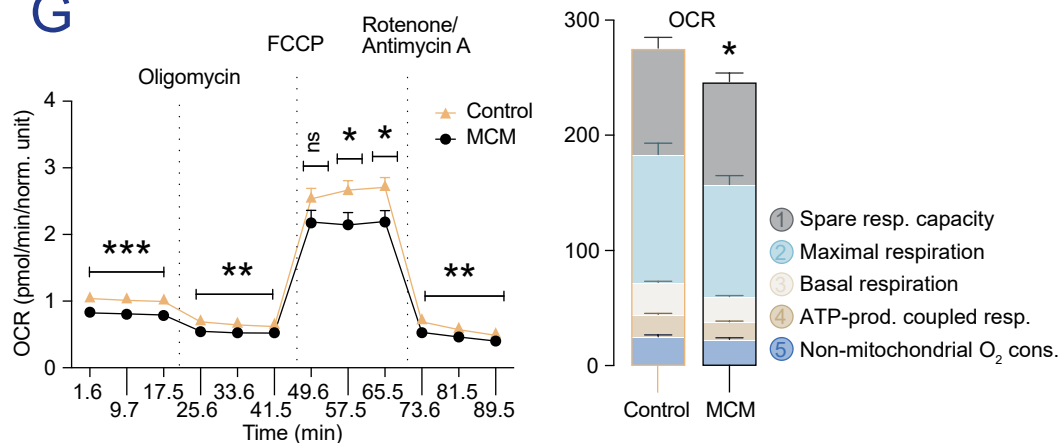

**A**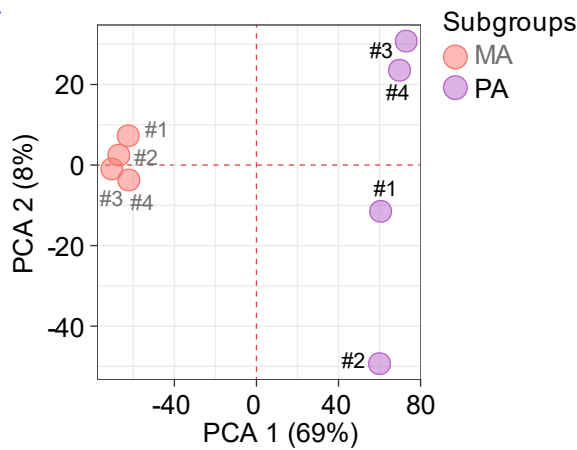**B**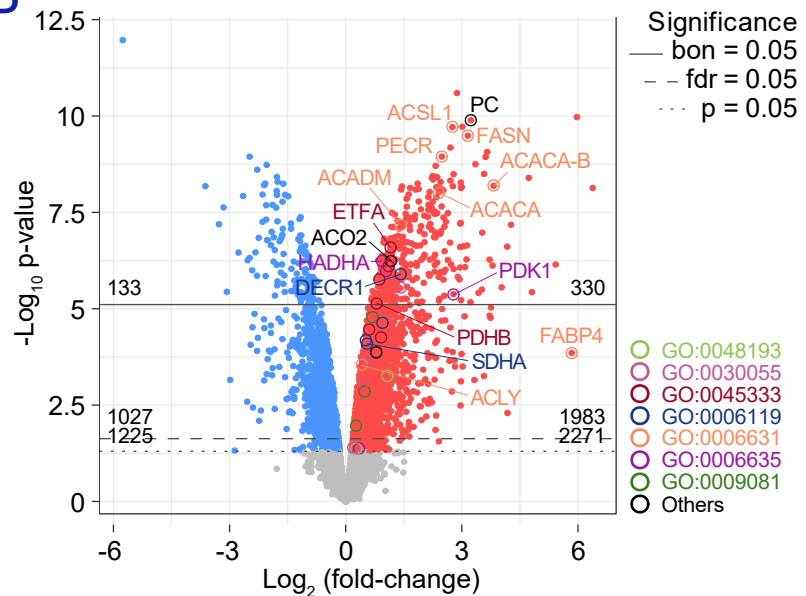**C**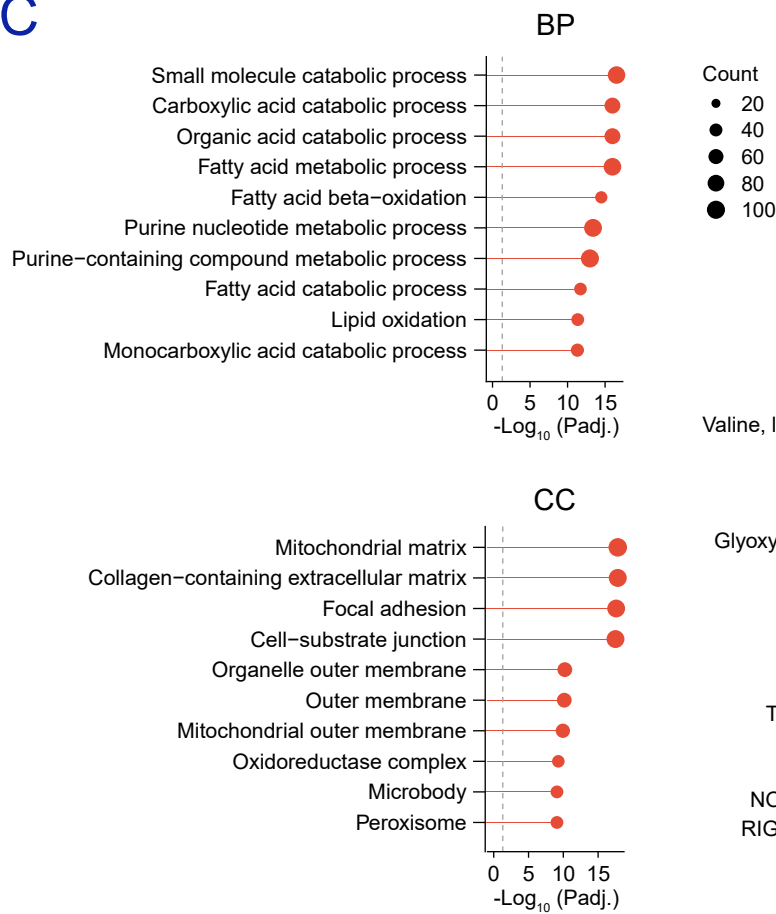**D**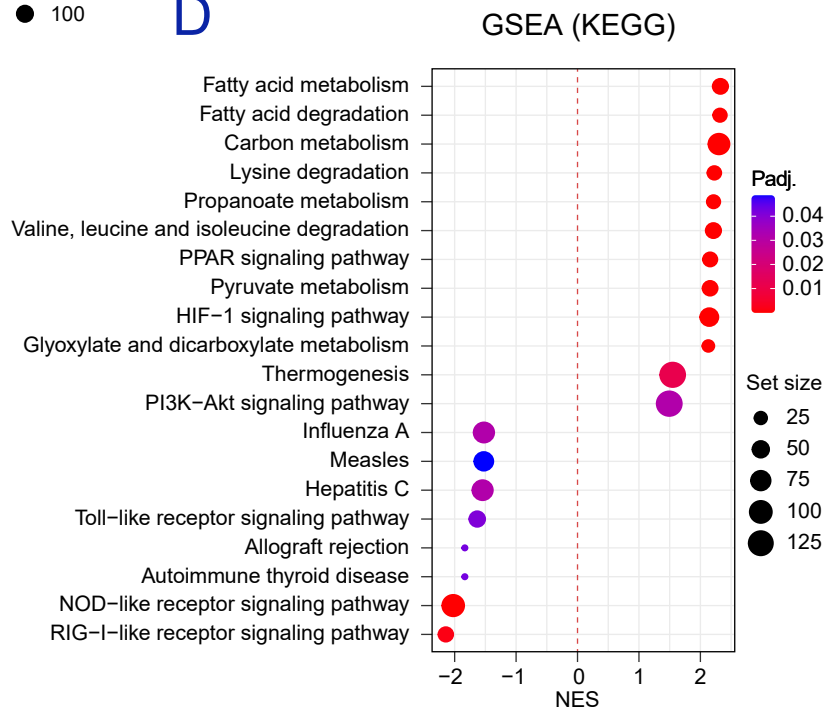**E**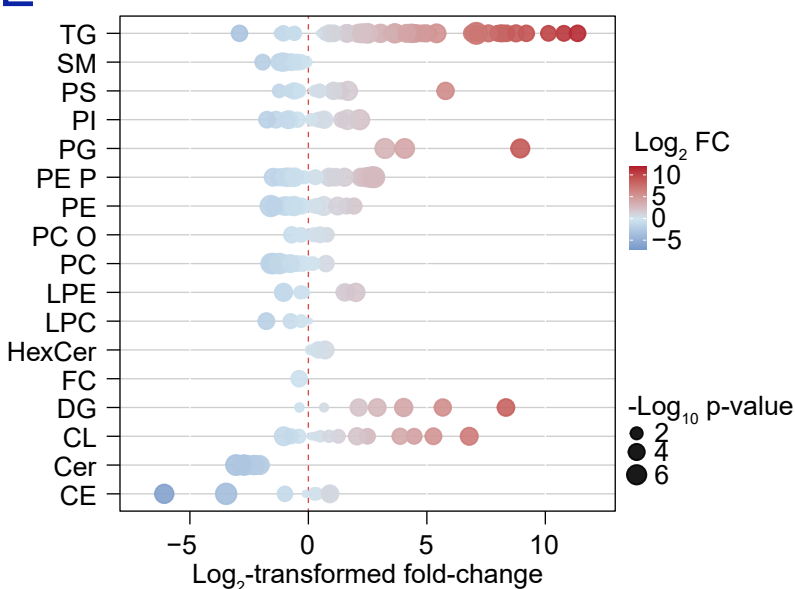**F**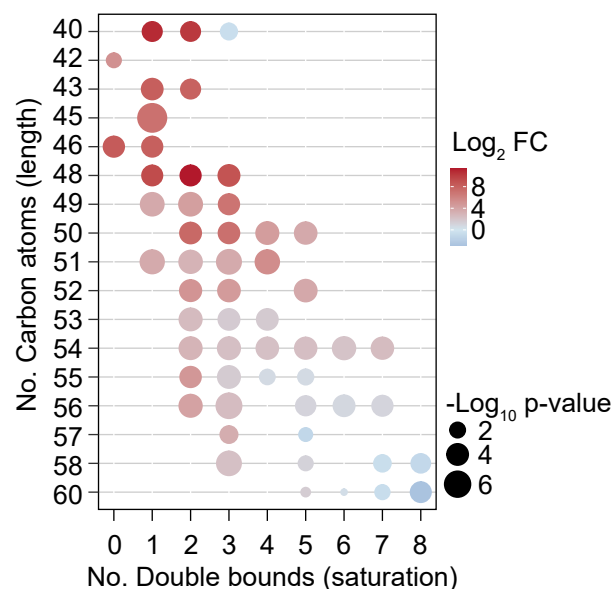

**A**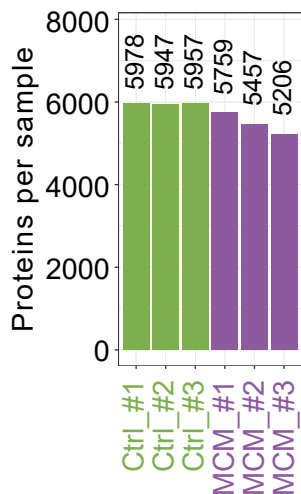**B**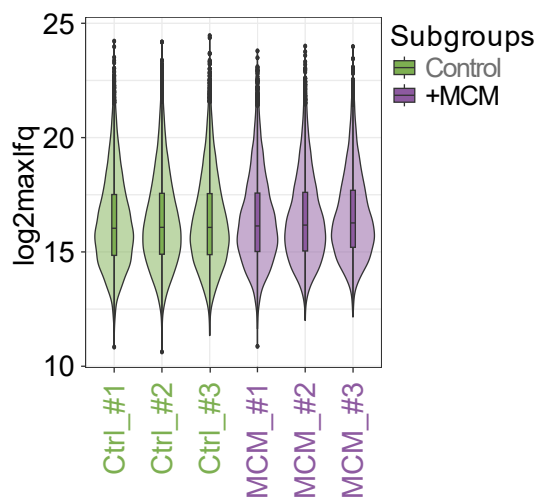**C**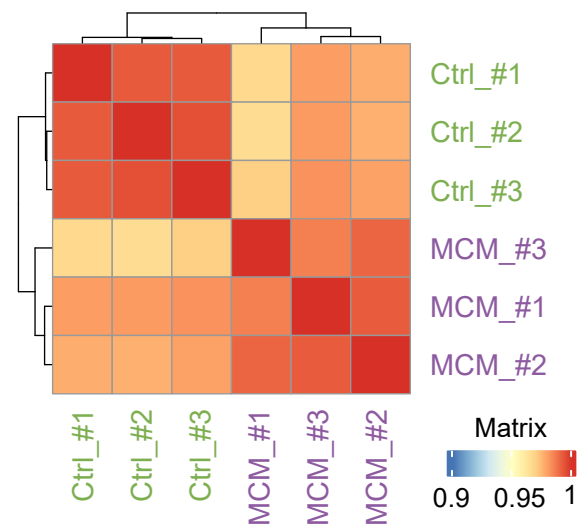**D**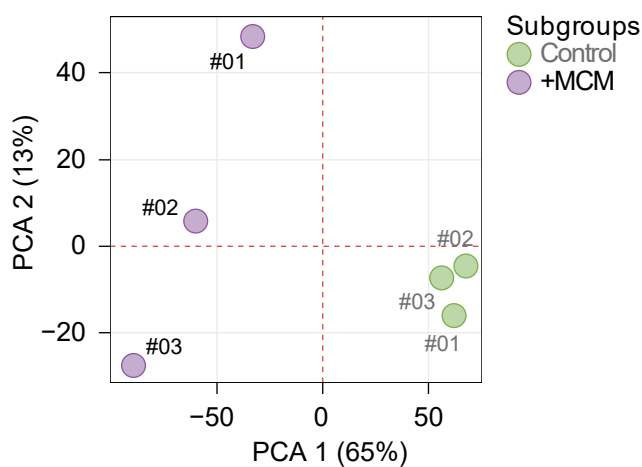**E**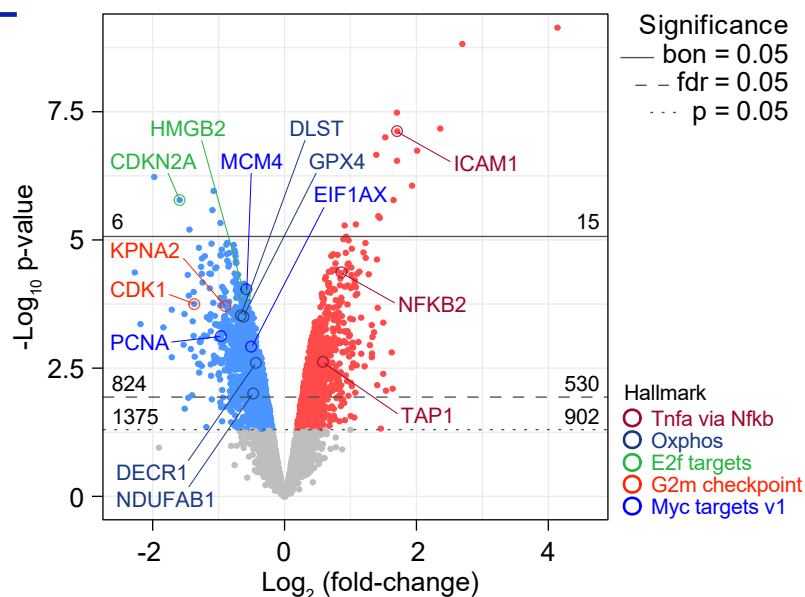**F**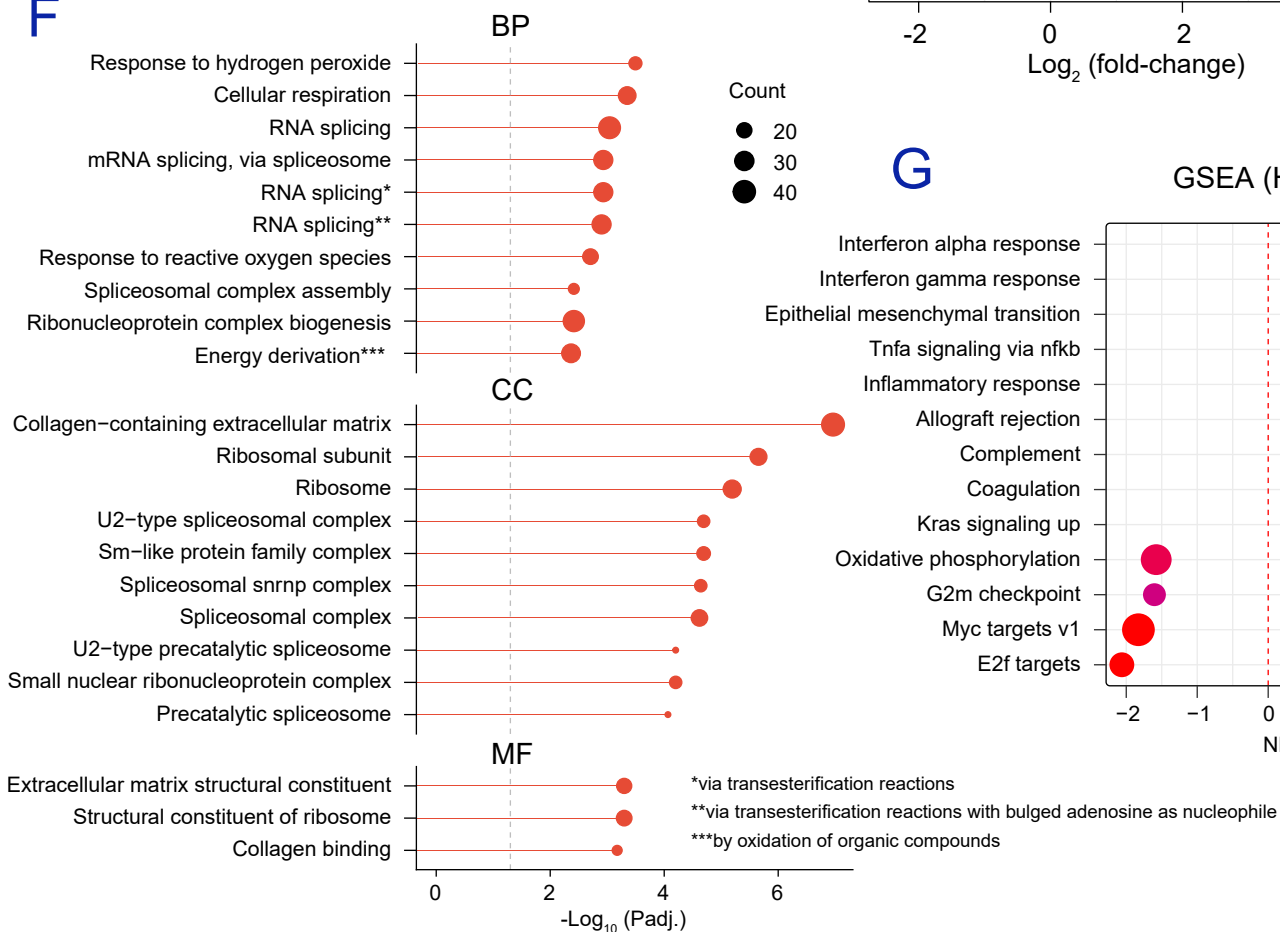**G**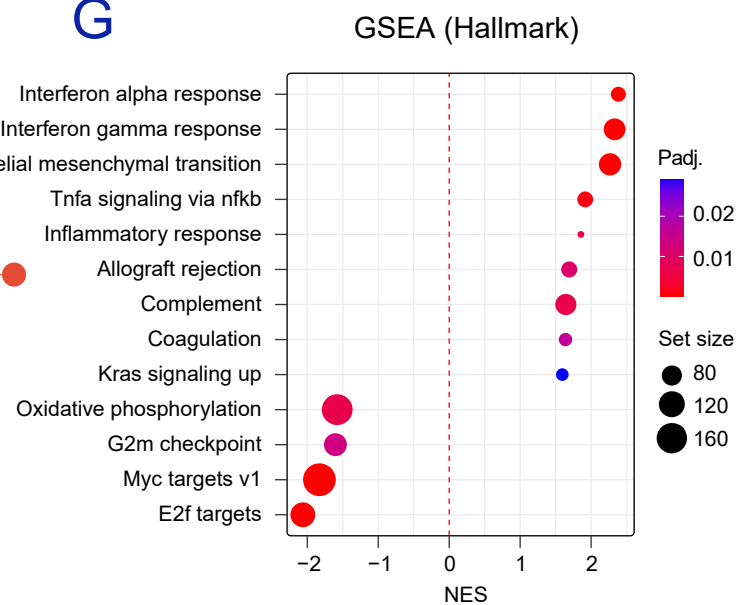

**A**

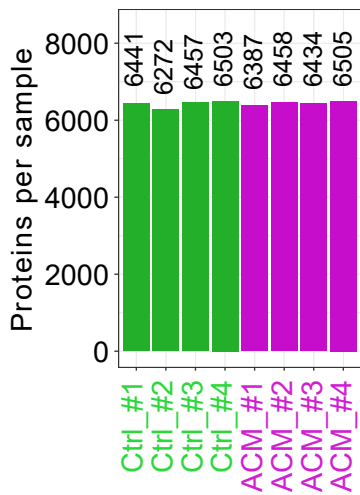

**B**

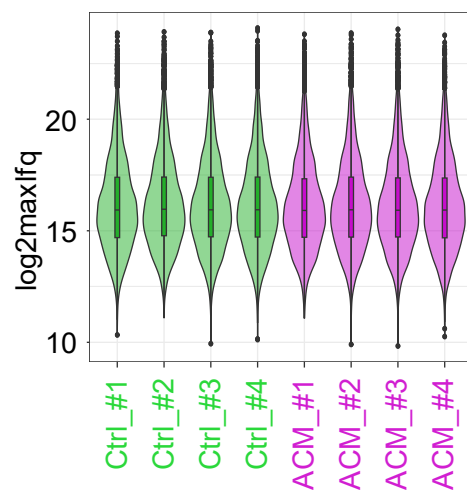

**C**

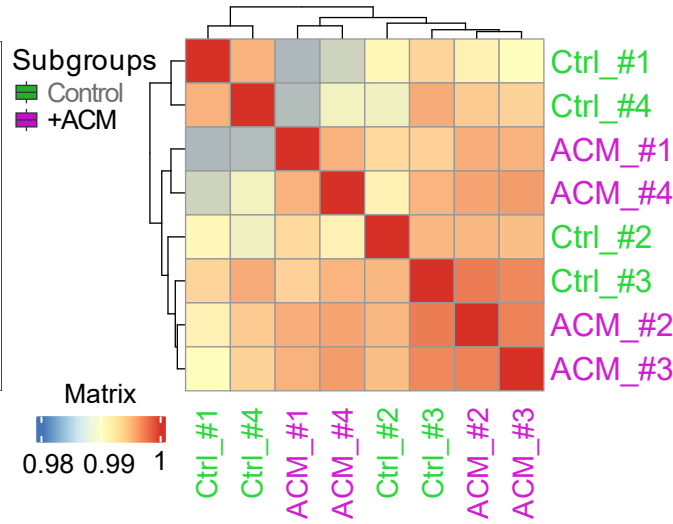

**D**

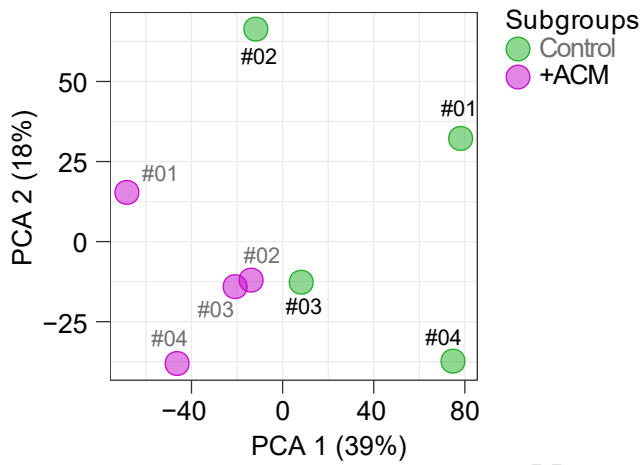

**F**

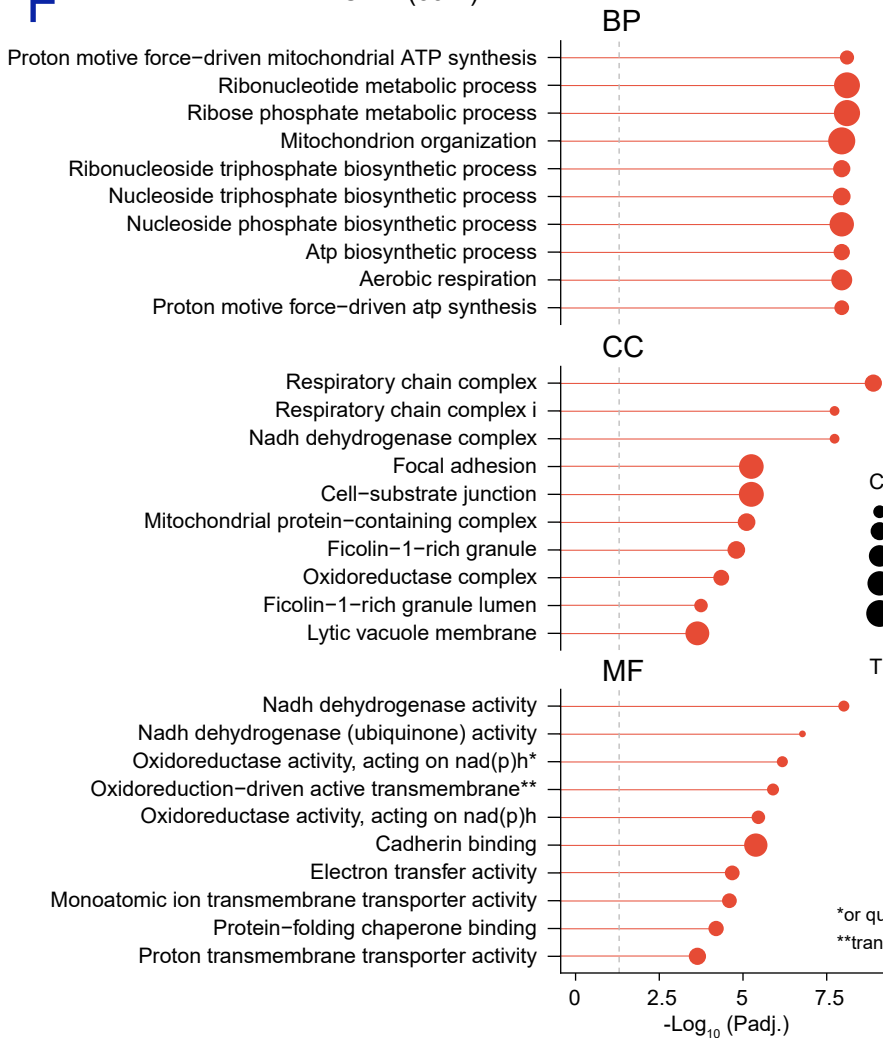

**E**

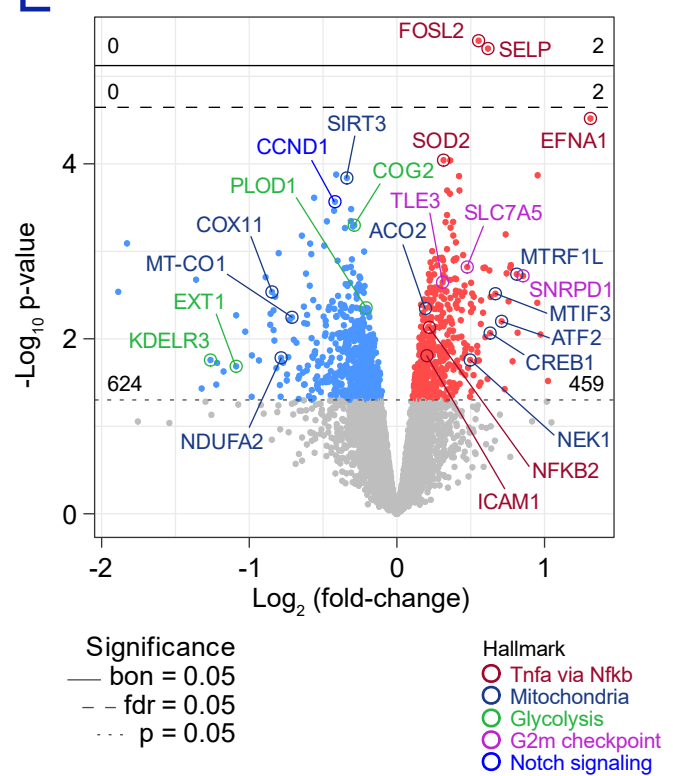

**G**

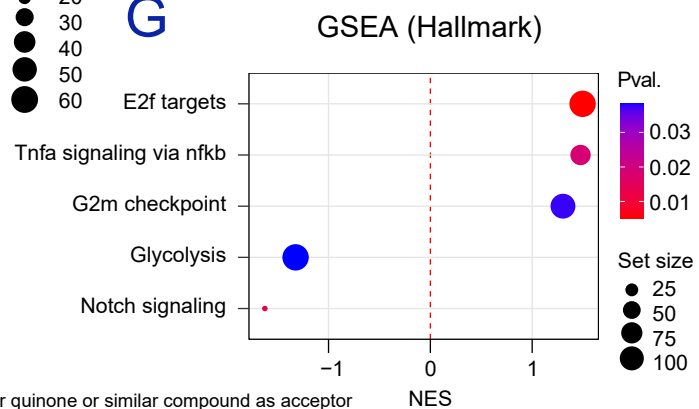

\*or quinone or similar compound as acceptor  
\*\*transporter activity

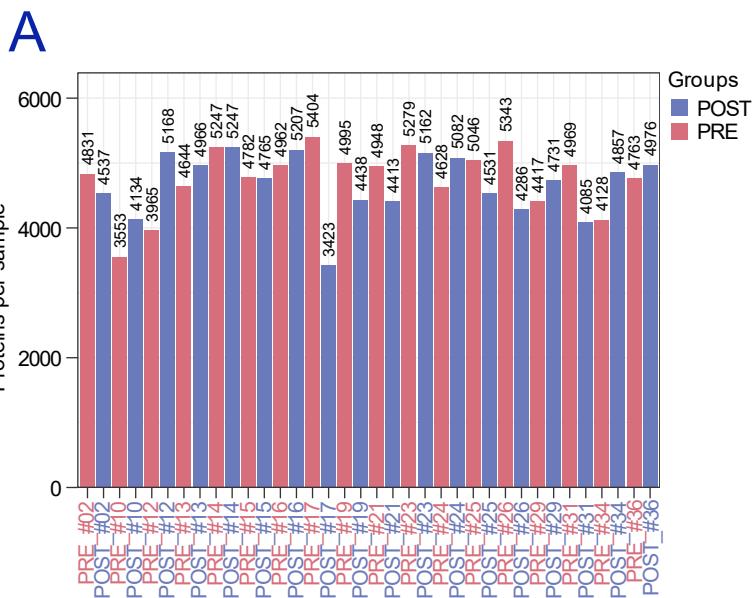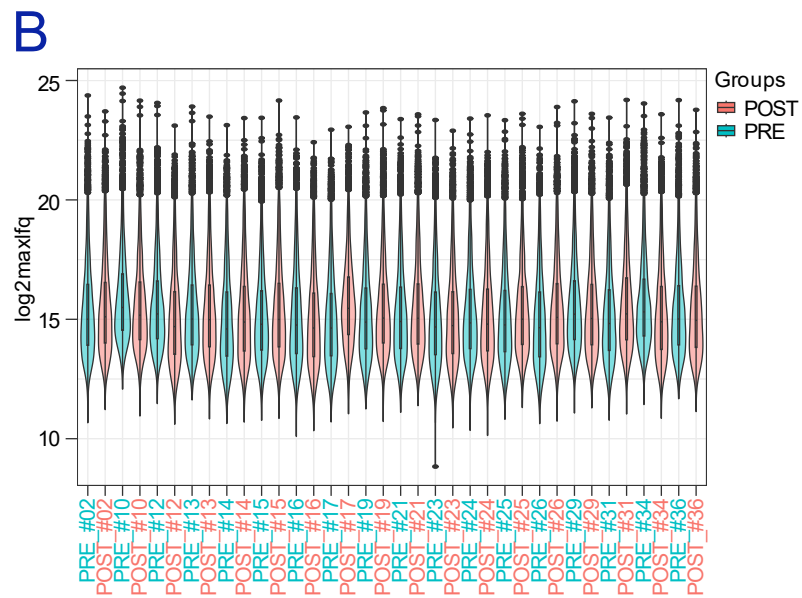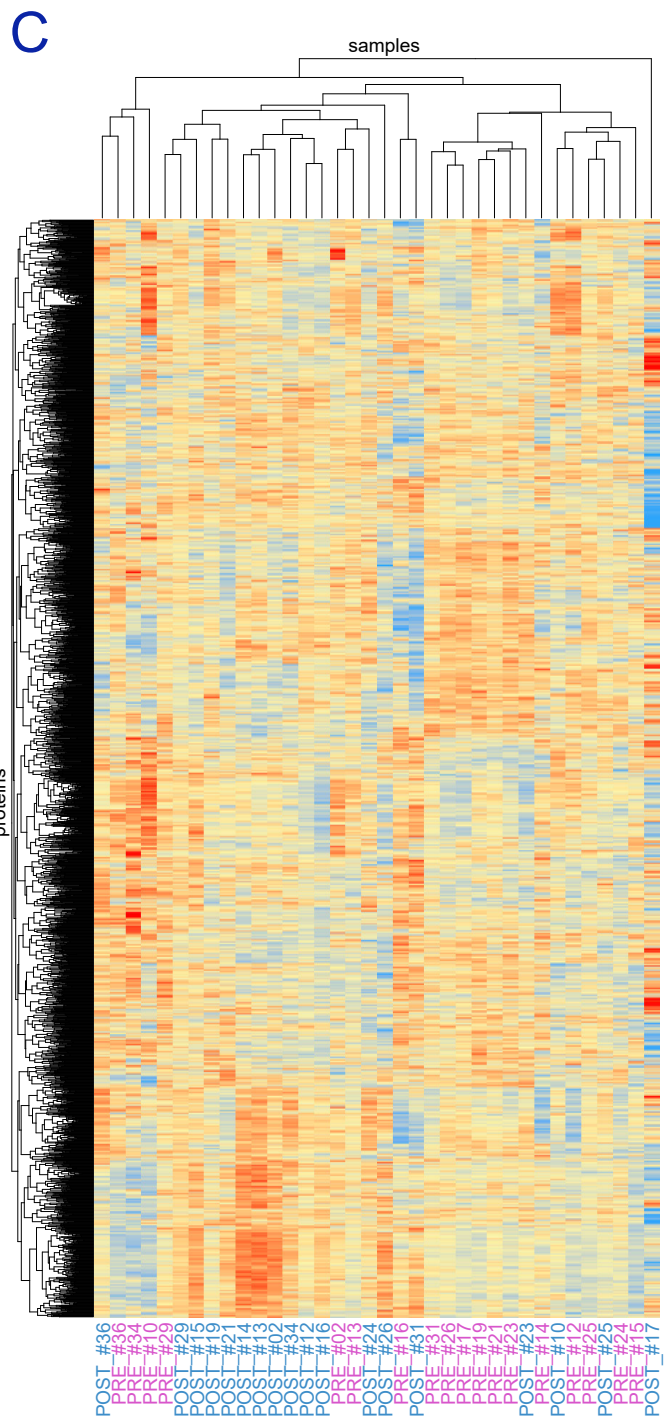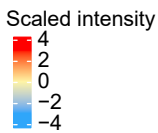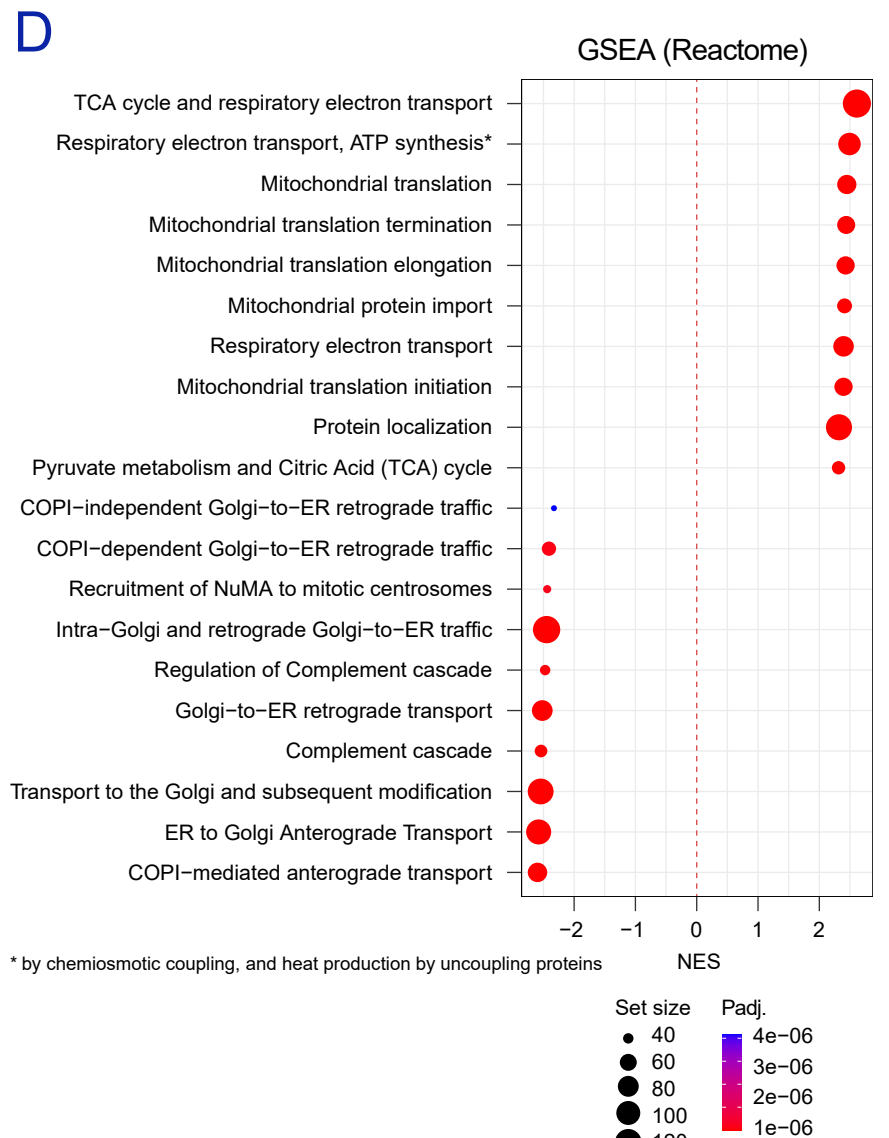

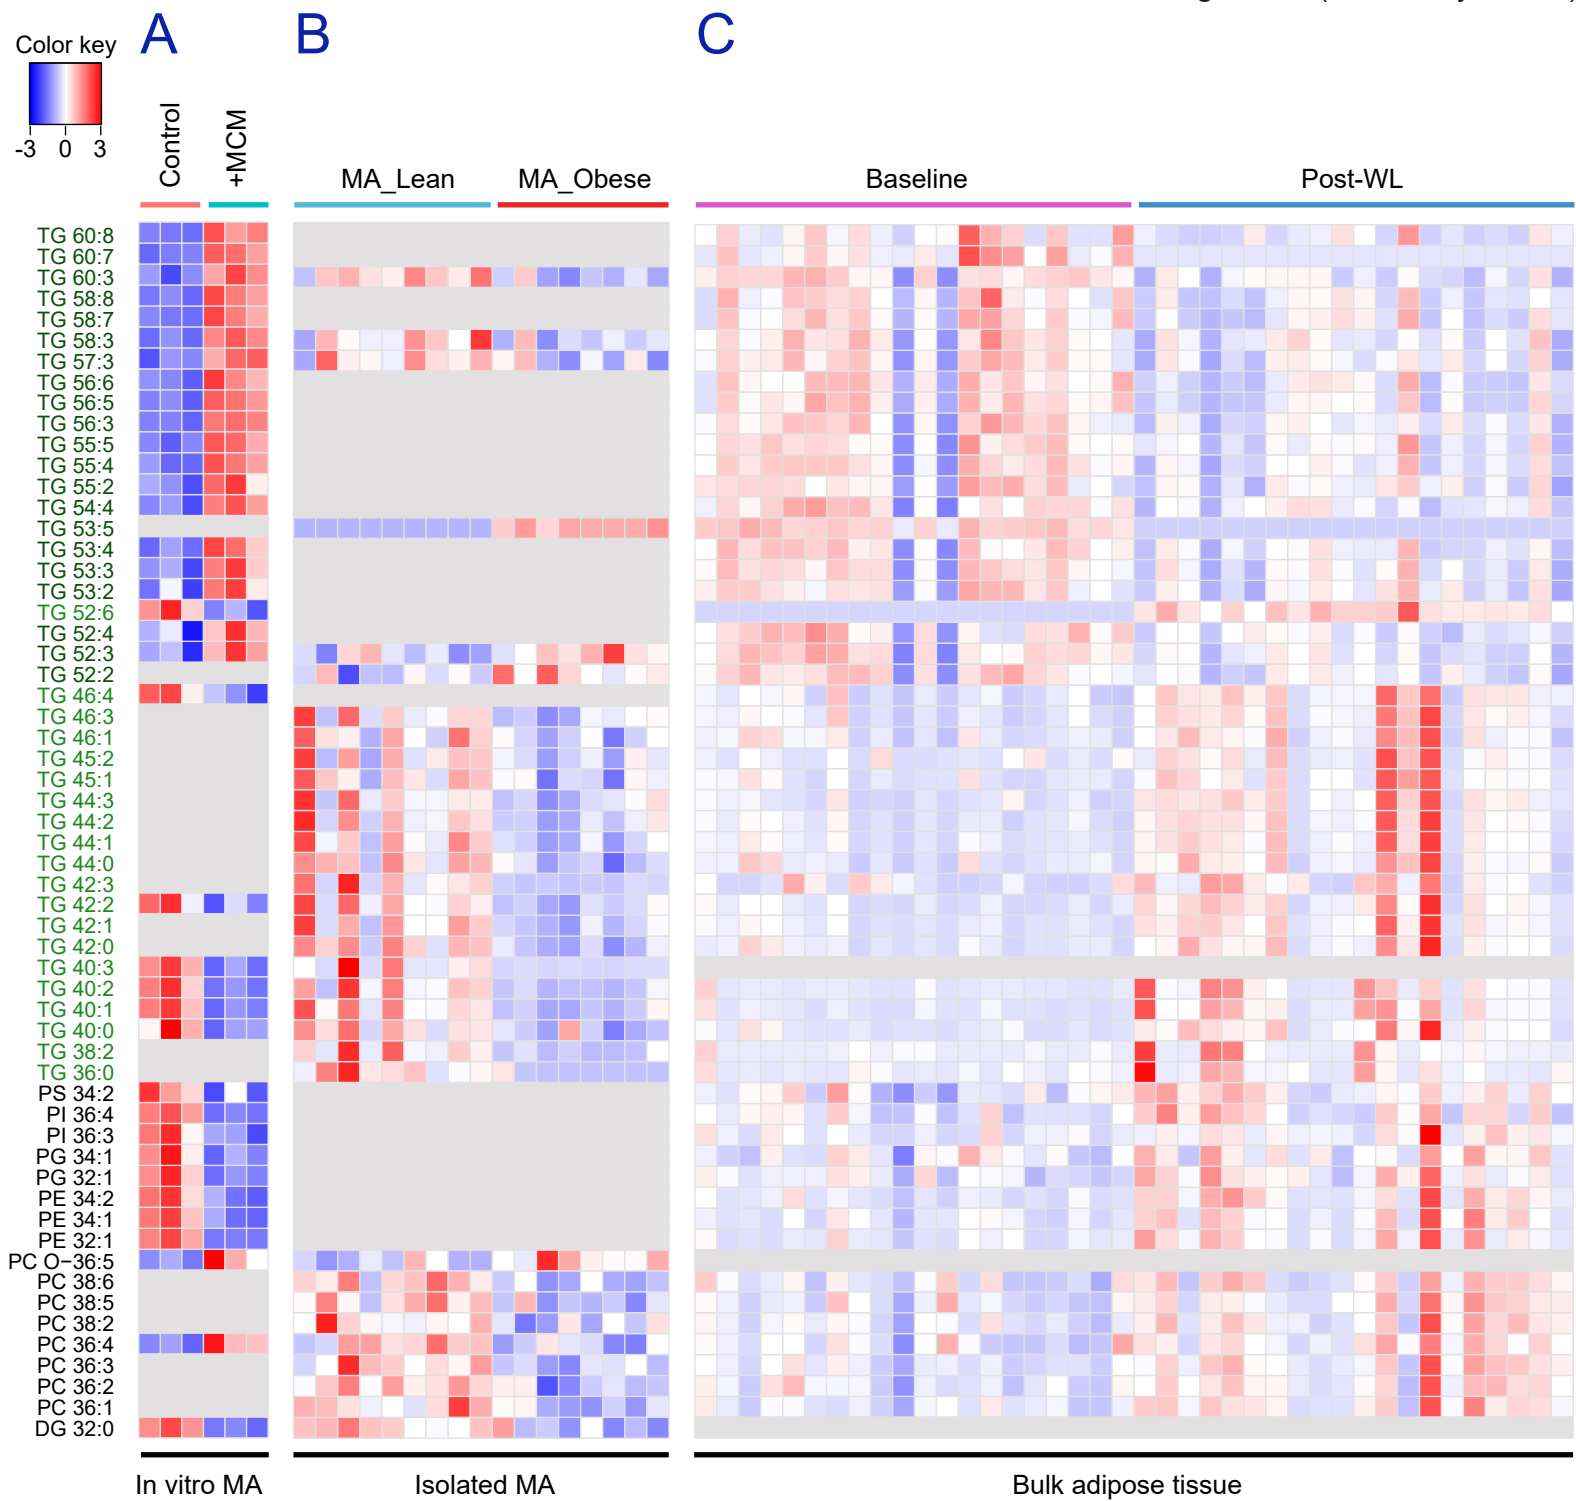

A

## Flowchart study design and main results in adipocytes/bulk adipose tissue

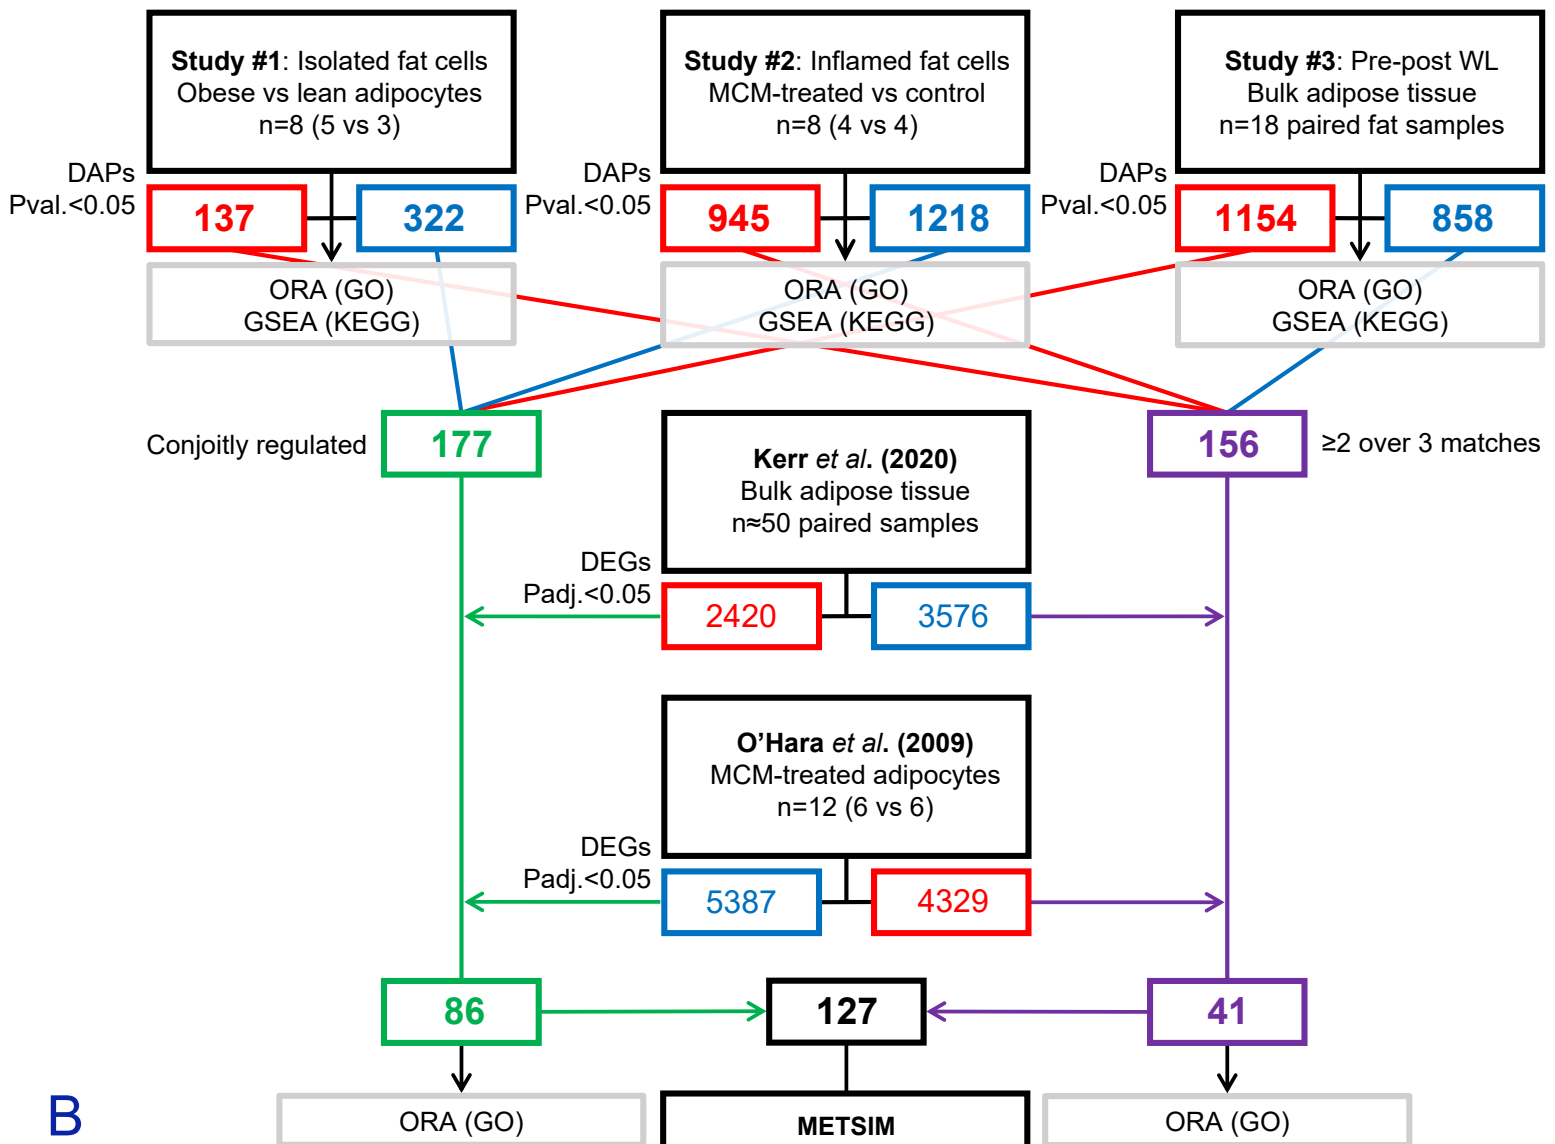

B

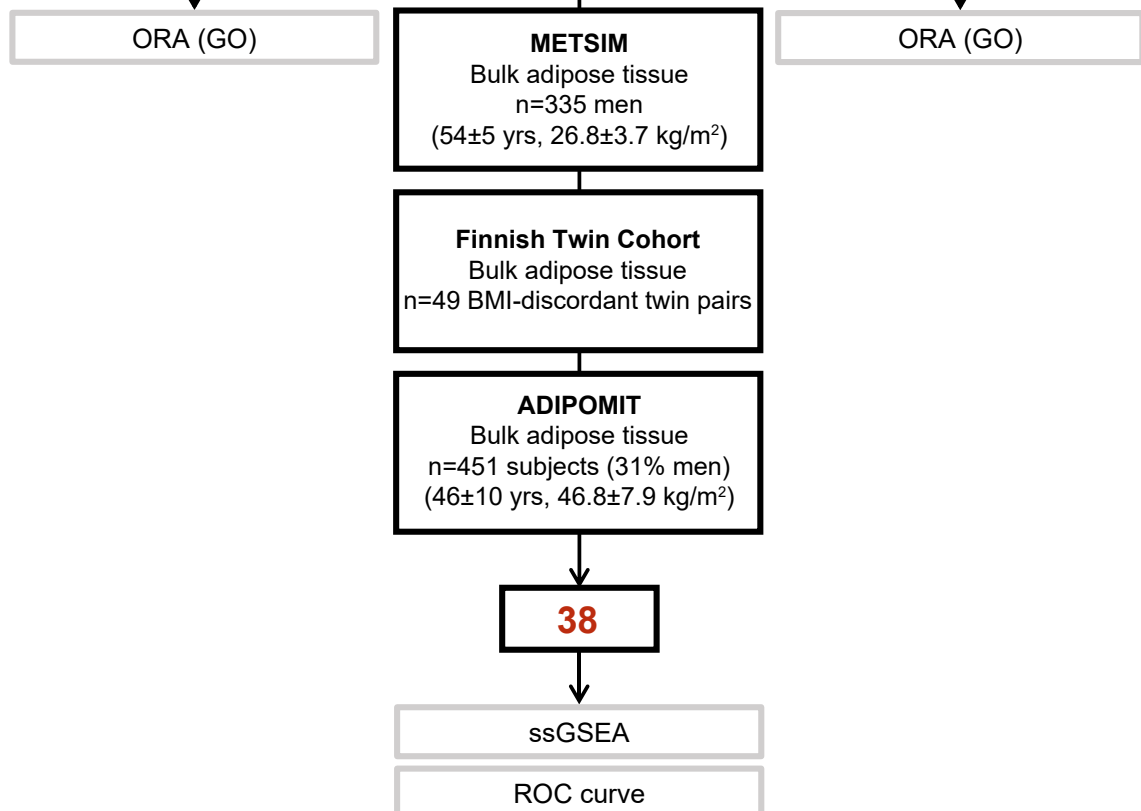

A

## Flowchart study design and main results in EC/adipocytes/bulk adipose tissue

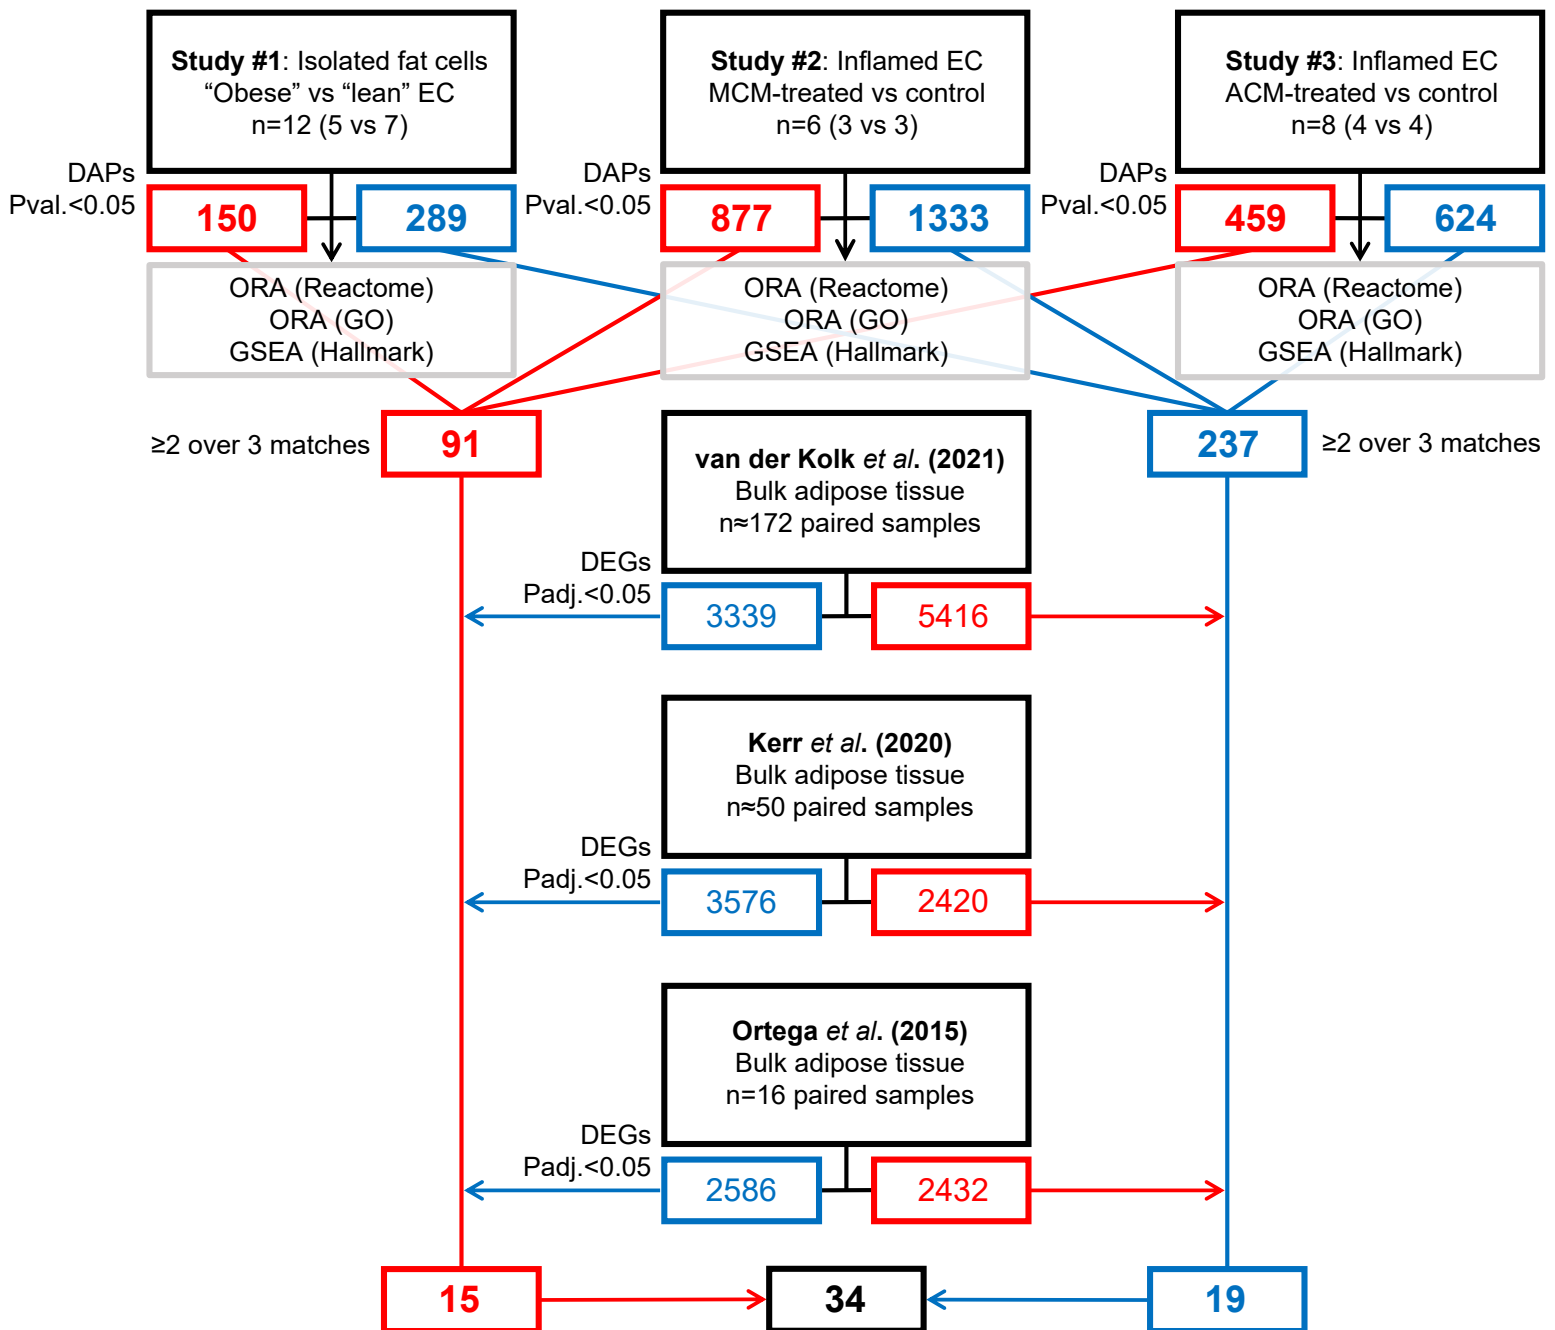

B

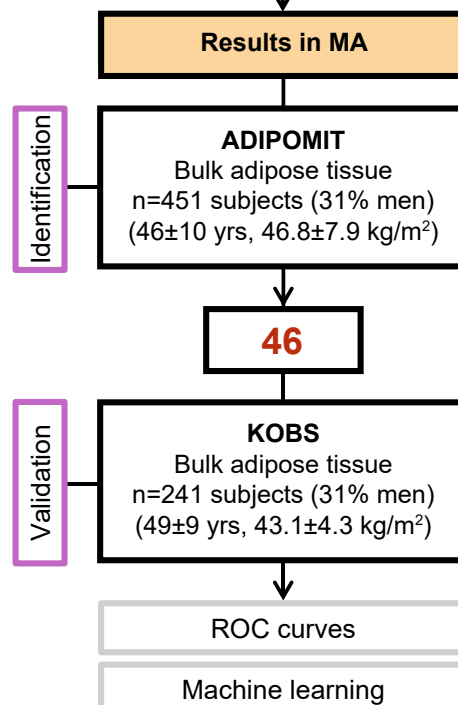

A

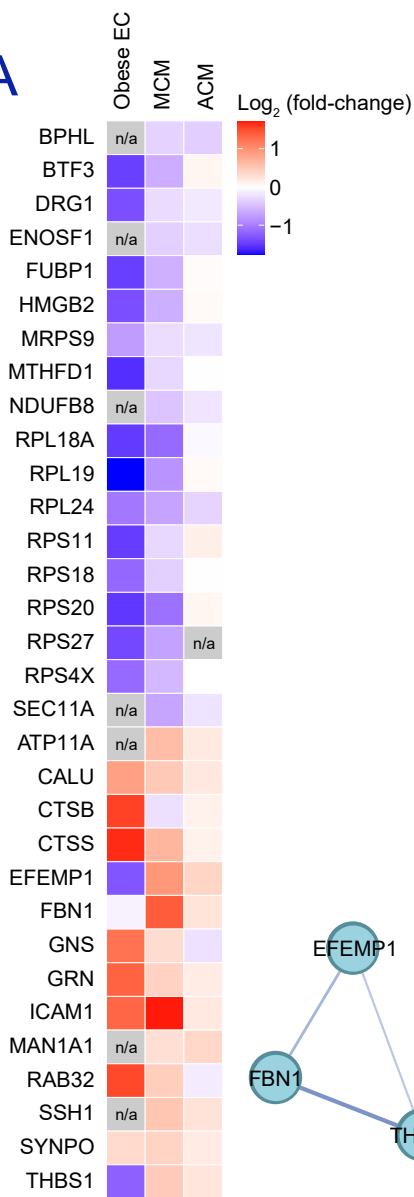

B

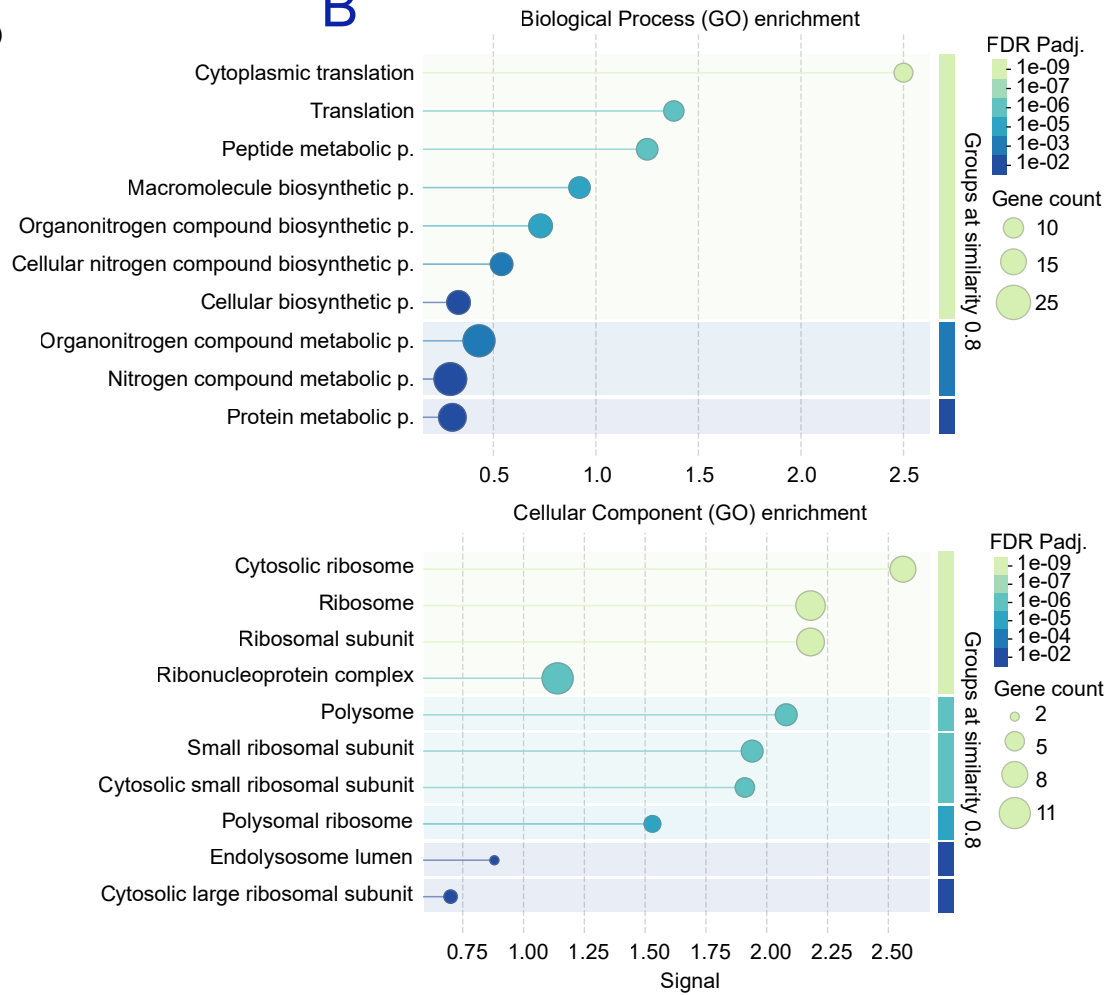

C

## MCL clustering (stochastic flow)

- Cytoplasmic translation
- Endolysosome lumen
- Post-embryonic eye morphogenesis (Elastic fibre formation)

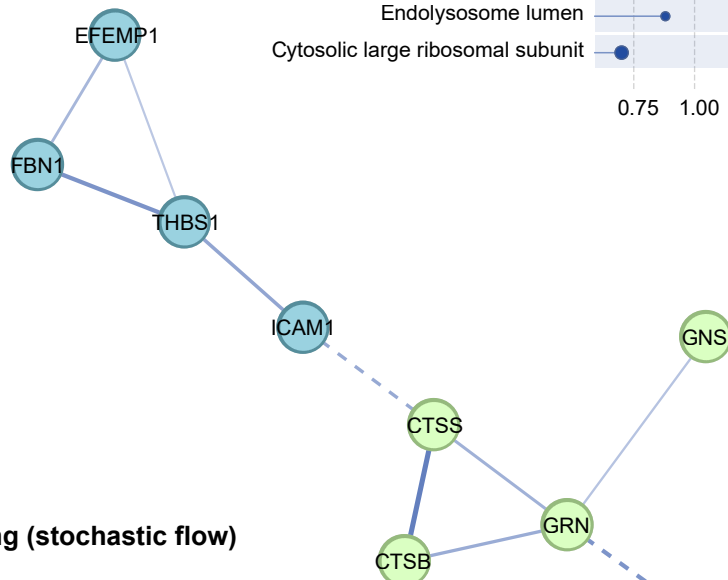

D

34 genes vs "healthy/unhealthy" obesity

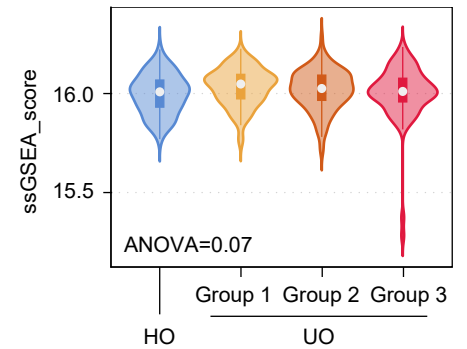

E

## Biomarkers adipocytes

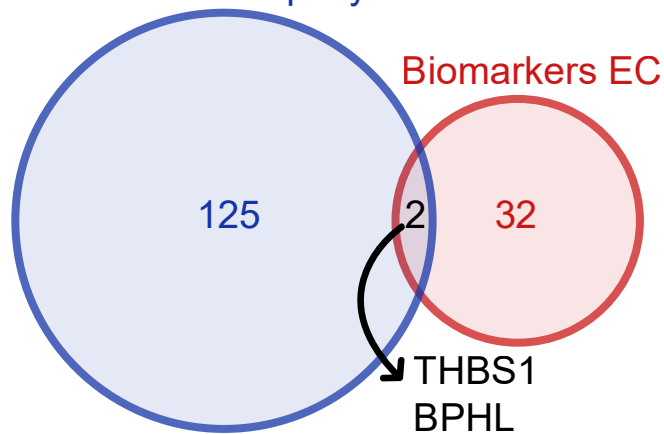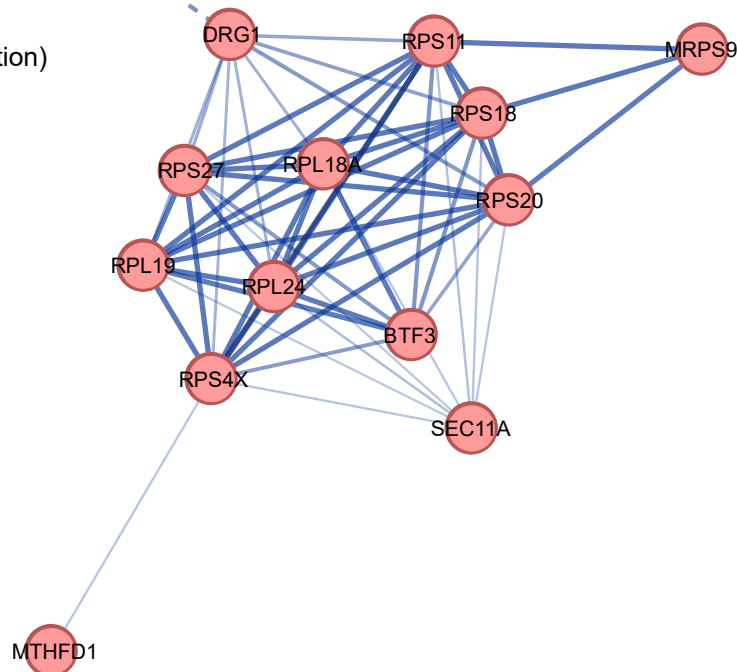

A

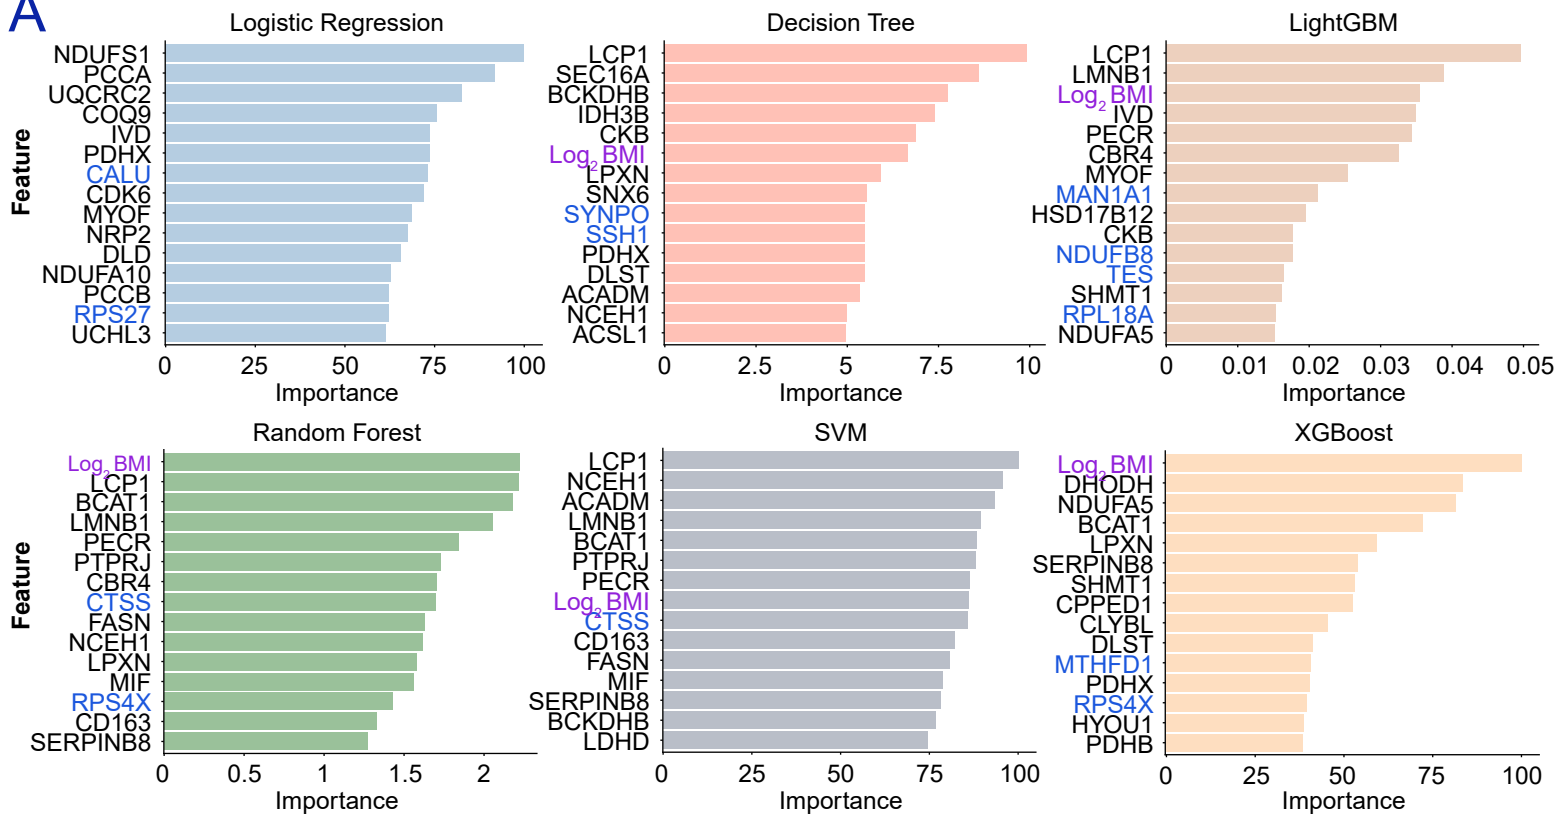

B

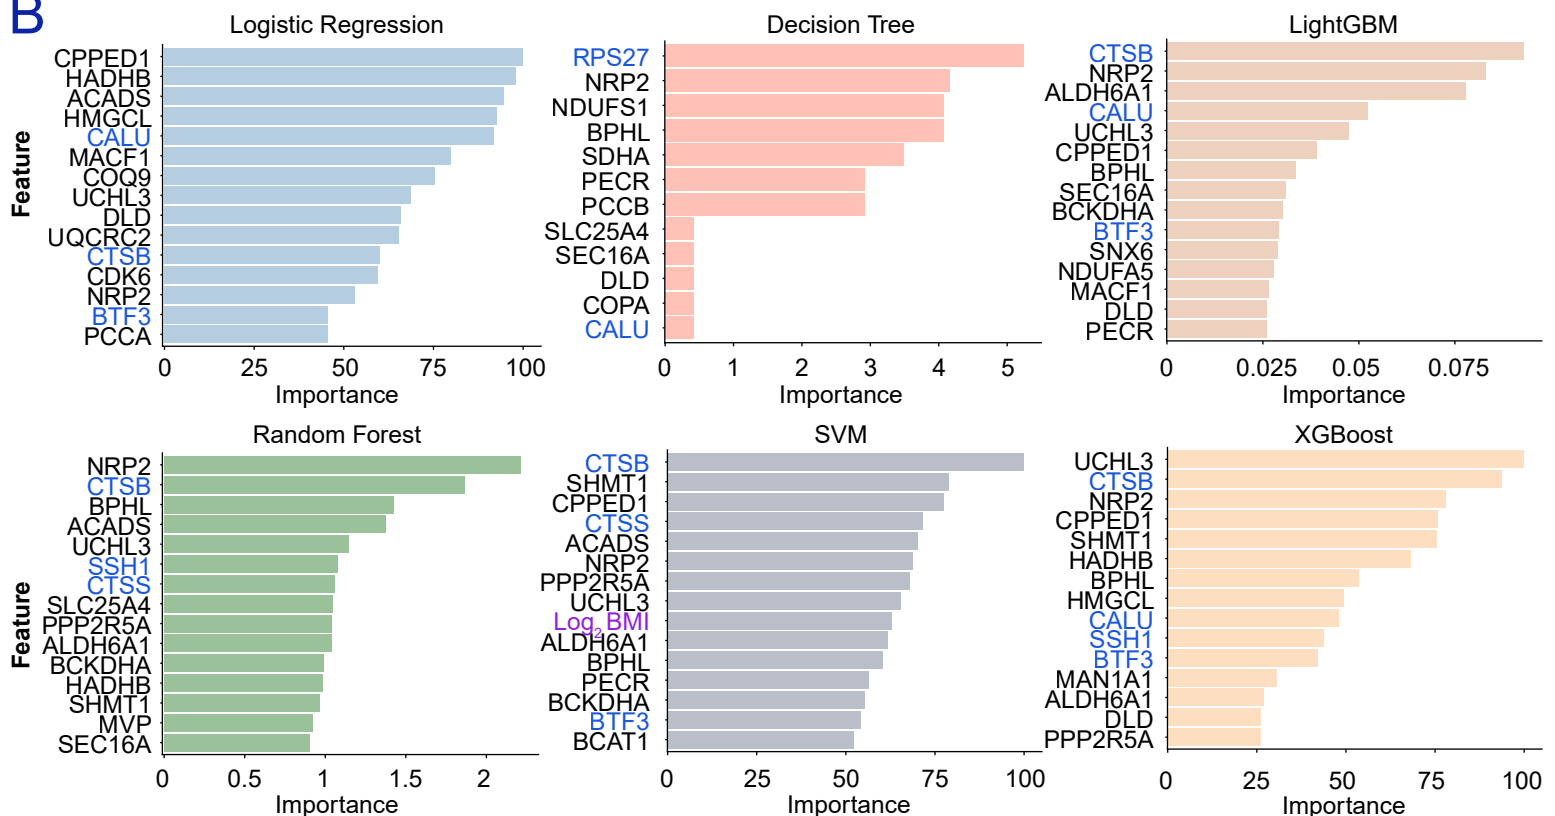

C

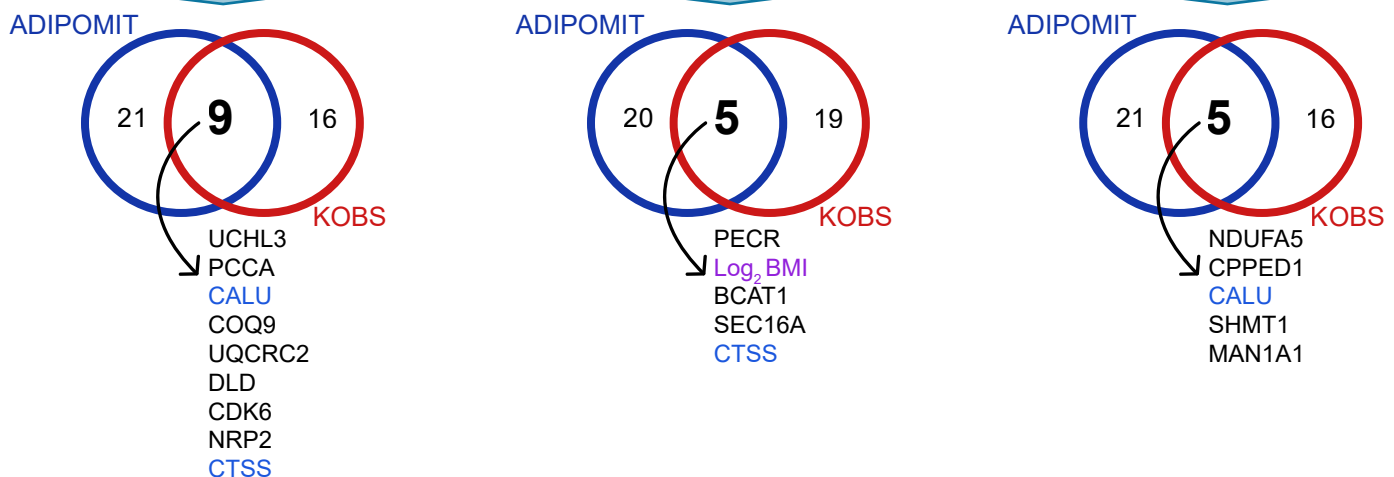

Supplement: Supplementary file 2 [file 471e2b46892af685629a6d96.pdf]
