# Supplementary material for: An adipocyte-endothelial framework to identify molecular signatures of metabolic vulnerability in obesity
Source: Research Square preprint supplement (doi:10.21203/rs.3.rs-9485802/v1), 2026-04-23
Supplement: Supplementary file 1 [file 20624c17c07538106eb1dcfb.xlsx]

## Sheet: Fig._1c
Figure 1c
ONTOLOGY	ID	Description	GeneRatio	BgRatio	pvalue	p.adjust	qvalue	geneID	Count	From
BP	GO:0045333	Cellular respiration	73/390	245/18805	2.26201e-64	8.00976e-61	6.90269e-61	CS/UQCRH/SUCLA2/SUCLG1/ETFB/DLAT/MDH2/ACO2/SUCLG2/PDHB/PDHA1/ETFA/NIPSNAP2/COQ9/IDH3G/UQCRQ/IDH3B/DLST/ATP5MG/SLC35A4/FH/IDH3A/NDUFV2/IDH2/NDUFAB1/UQCR10/PPIF/COX7A2/NDUFA11/DLD/UQCRFS1/SOD2/UQCRB/UQCRC1/UQCC2/ATP5F1D/ATP5F1A/CYCS/ATP5F1B/OGDH/NDUFS8/COX6C/ATP5ME/NNT/UQCRC2/NDUFB10/SDHB/ETFDH/NDUFS3/CYC1/COX4I1/NDUFA8/SDHA/ATP5PO/SDHC/NDUFV1/ATP5F1C/MT-ND5/MT-CO2/MT-ATP8/CISD1/ATP5PB/COX7A1/SHMT2…	73	Protein
BP	GO:0015980	Energy derivation by oxidation of organic compounds	82/390	352/18805	6.54109e-63	1.1581e-59	9.98033e-60	GYG1/UGP2/PYGL/COMT/CS/UQCRH/SUCLA2/SUCLG1/ACADM/ETFB/ADHFE1/DLAT/MDH2/ACO2/SUCLG2/PDHB/PDHA1/ETFA/NIPSNAP2/COQ9/IDH3G/UQCRQ/IDH3B/DLST/ATP5MG/SLC35A4/FH/IDH3A/NDUFV2/IDH2/NDUFAB1/UQCR10/PPIF/COX7A2/NDUFA11/DLD/ACADVL/UQCRFS1/SOD2/UQCRB/UQCRC1/UQCC2/ATP5F1D/ATP5F1A/CYCS/ATP5F1B/OGDH/NDUFS8/COX6C/ATP5ME/PYGM/NNT/UQCRC2/NDUFB10/SDHB/ETFDH/NDUFS3/GYS1/CYC1/COX4I1/NDUFA8/SDHA/ATP5PO/SDHC/NDUFV1/ATP5F…	82	Protein
BP	GO:0009060	Aerobic respiration	67/390	201/18805	9.98266e-63	1.17829e-59	1.01543e-59	CS/UQCRH/SUCLA2/SUCLG1/DLAT/MDH2/ACO2/SUCLG2/PDHB/PDHA1/NIPSNAP2/COQ9/IDH3G/UQCRQ/IDH3B/DLST/ATP5MG/FH/IDH3A/NDUFV2/IDH2/NDUFAB1/UQCR10/PPIF/COX7A2/NDUFA11/DLD/UQCRFS1/UQCRB/UQCRC1/UQCC2/ATP5F1D/ATP5F1A/CYCS/ATP5F1B/OGDH/NDUFS8/COX6C/ATP5ME/NNT/UQCRC2/NDUFB10/SDHB/NDUFS3/CYC1/COX4I1/NDUFA8/SDHA/ATP5PO/SDHC/NDUFV1/ATP5F1C/MT-ND5/MT-CO2/MT-ATP8/ATP5PB/COX7A1/SHMT2/STOML2/GHITM/NDUFA10/NDUFS2/MT-ND4…	67	Protein
BP	GO:0006091	Generation of precursor metabolites and energy	91/390	484/18805	3.00603e-61	2.66109e-58	2.29329e-58	GYG1/UGP2/PYGL/UCHL1/POR/COMT/CS/UQCRH/SUCLA2/SUCLG1/ACADM/ETFB/ADHFE1/HMGCL/ACAT1/DLAT/MDH2/ACO2/SUCLG2/PDHB/PDHA1/SLC25A4/ETFA/NIPSNAP2/COQ9/IDH3G/HK2/UQCRQ/IDH3B/DLST/ATP5MG/SLC35A4/FH/IDH3A/HK1/NDUFV2/IDH2/NDUFAB1/UQCR10/PPIF/OXCT1/COX7A2/NDUFA11/DLD/ACADVL/UQCRFS1/SOD2/UQCRB/UQCRC1/UQCC2/ATP5F1D/ATP5F1A/CYCS/ATP5F1B/OGDH/FECH/NDUFS8/COX6C/ATP5ME/PYGM/NNT/UQCRC2/NDUFB10/SDHB/ETFDH/NDUFS3/GYS1…	91	Protein
BP	GO:0006119	Oxidative phosphorylation	50/390	151/18805	1.35563e-46	9.60054e-44	8.2736e-44	UQCRH/NIPSNAP2/COQ9/UQCRQ/ATP5MG/NDUFV2/NDUFAB1/UQCR10/PPIF/COX7A2/NDUFA11/DLD/UQCRFS1/UQCRB/UQCRC1/UQCC2/ATP5F1D/ATP5F1A/CYCS/ATP5F1B/NDUFS8/COX6C/ATP5ME/UQCRC2/NDUFB10/SDHB/NDUFS3/CYC1/COX4I1/NDUFA8/SDHA/ATP5PO/SDHC/NDUFV1/ATP5F1C/MT-ND5/MT-CO2/MT-ATP8/ATP5PB/COX7A1/SHMT2/STOML2/GHITM/NDUFA10/NDUFS2/MT-ND4/NDUFB9/NDUFA5/NDUFB4/NDUFB3	50	Protein
BP	GO:0016054	Organic acid catabolic process	58/390	242/18805	5.2486e-45	2.65504e-42	2.28808e-42	DECR1/ALDH6A1/BCKDHA/PCCA/GCSH/GCDH/ACAA2/MCCC2/ACADM/HADHA/HADH/TST/ETFB/ADHFE1/DCXR/HMGCL/ECHS1/ACAT1/PCCB/HIBCH/AUH/LDHD/ETFA/BCKDHB/ECI1/PCK2/ACADS/DLST/HSD17B10/BCAT2/GLUD1/HADHB/MCCC1/HIBADH/ECH1/DBT/ECI2/ACADSB/DLD/ACADVL/ACAD8/ALDH5A1/CRAT/PCK1/IVD/GSTZ1/EHHADH/GPT2/SCP2/CPT2/ETFDH/ECHDC2/ACADL/GLUL/KYAT3/ACAA1/MCEE/SHMT1	58	Protein
BP	GO:0046395	Carboxylic acid catabolic process	58/390	242/18805	5.2486e-45	2.65504e-42	2.28808e-42	DECR1/ALDH6A1/BCKDHA/PCCA/GCSH/GCDH/ACAA2/MCCC2/ACADM/HADHA/HADH/TST/ETFB/ADHFE1/DCXR/HMGCL/ECHS1/ACAT1/PCCB/HIBCH/AUH/LDHD/ETFA/BCKDHB/ECI1/PCK2/ACADS/DLST/HSD17B10/BCAT2/GLUD1/HADHB/MCCC1/HIBADH/ECH1/DBT/ECI2/ACADSB/DLD/ACADVL/ACAD8/ALDH5A1/CRAT/PCK1/IVD/GSTZ1/EHHADH/GPT2/SCP2/CPT2/ETFDH/ECHDC2/ACADL/GLUL/KYAT3/ACAA1/MCEE/SHMT1	58	Protein
BP	GO:0044248	Cellular catabolic process	64/390	323/18805	3.67594e-44	1.62706e-41	1.40218e-41	CAPN1/ANXA2/DECR1/ALDH6A1/BCKDHA/PCCA/GCSH/GCDH/ACAA2/MCCC2/SUCLA2/SUCLG1/ACADM/HADHA/HADH/TST/ETFB/ADHFE1/DCXR/HMGCL/ECHS1/ACAT1/PCCB/SUCLG2/HIBCH/AUH/LDHD/ETFA/BCKDHB/ECI1/PCK2/ACADS/MME/DLST/HSD17B10/BCAT2/GLUD1/HADHB/MCCC1/HIBADH/ECH1/DBT/ECI2/ACADSB/DLD/ACADVL/ACAD8/ALDH5A1/CRAT/PCK1/IVD/GSTZ1/EHHADH/GPT2/SCP2/CPT2/ETFDH/ECHDC2/ACADL/GLUL/KYAT3/ACAA1/MCEE/SHMT1	64	Protein
BP	GO:0044282	Small molecule catabolic process	66/390	370/18805	1.66869e-42	6.56536e-40	5.65793e-40	AKR1C3/SULT1A1/NUDT5/DECR1/ALDH6A1/BCKDHA/PCCA/GCSH/GCDH/ACAA2/MCCC2/ACADM/HADHA/HADH/TST/ETFB/ADHFE1/DCXR/HMGCL/ECHS1/ACAT1/PCCB/HIBCH/AUH/LDHD/ETFA/BCKDHB/ECI1/PCK2/HK2/ACADS/DLST/HSD17B10/BCAT2/ALDH1B1/GLUD1/HADHB/MCCC1/HIBADH/HK1/ECH1/DBT/ECI2/ACADSB/OXCT1/DLD/ACADVL/ACAD8/ALDH5A1/CRAT/PCK1/IVD/GSTZ1/EHHADH/GPT2/SCP2/CPT2/ETFDH/ECHDC2/ACADL/GLUL/KYAT3/ACAA1/GPD2/MCEE/SHMT1	66	Protein
BP	GO:1901293	Nucleoside phosphate biosynthetic process	59/390	322/18805	1.17047e-38	4.14462e-36	3.57177e-36	UGP2/ADK/GMPPB/NME1/GCDH/PDHX/ACAT1/DLAT/PDHB/PDHA1/PDK1/ATP5MG/ATP5MJ/AK2/HK1/HSD17B12/NDUFV2/DHODH/ATP5MK/NDUFAB1/NDUFA11/DUT/DLD/ACSL1/ATP5F1D/ATP5F1A/AK3/ATP5F1B/MPC2/FASN/ACACA/NDUFS8/ATP5ME/NDUFB10/SDHB/NDUFS3/NADK2/PDK2/NDUFA8/SDHA/ATP5PO/SDHC/MMUT/NDUFV1/ATP5F1C/CBR4/MT-ND5/MT-ATP8/ATP5PB/STOML2/NDUFA10/PDK4/NDUFS2/MT-ND4/NDUFB9/SHMT1/NDUFA5/NDUFB4/NDUFB3	59	Protein
BP	GO:0072522	Purine-containing compound biosynthetic process	54/390	264/18805	5.1647e-38	1.66256e-35	1.43277e-35	ADK/NME1/GCDH/PDHX/ACAT1/DLAT/PDHB/PDHA1/PDK1/ATP5MG/ATP5MJ/AK2/HSD17B12/NDUFV2/ATP5MK/NDUFAB1/NDUFA11/DLD/ACSL1/ATP5F1D/ATP5F1A/AK3/ATP5F1B/MPC2/FASN/ACACA/NDUFS8/ATP5ME/NDUFB10/SDHB/NDUFS3/NADK2/PDK2/NDUFA8/SDHA/ATP5PO/SDHC/MMUT/NDUFV1/ATP5F1C/CBR4/MT-ND5/MT-ATP8/ATP5PB/STOML2/NDUFA10/PDK4/NDUFS2/MT-ND4/NDUFB9/SHMT1/NDUFA5/NDUFB4/NDUFB3	54	Protein
BP	GO:0022904	Respiratory electron transport chain	39/390	117/18805	1.34587e-36	3.97143e-34	3.42251e-34	UQCRH/ETFB/ETFA/COQ9/UQCRQ/NDUFV2/NDUFAB1/UQCR10/COX7A2/DLD/UQCRFS1/SOD2/UQCRB/UQCRC1/CYCS/NDUFS8/COX6C/UQCRC2/NDUFB10/SDHB/ETFDH/NDUFS3/CYC1/COX4I1/NDUFA8/SDHA/SDHC/NDUFV1/MT-ND5/MT-CO2/COX7A1/GHITM/NDUFA10/NDUFS2/MT-ND4/NDUFB9/NDUFA5/NDUFB4/NDUFB3	39	Protein
BP	GO:0022900	Electron transport chain	40/390	127/18805	2.18055e-36	5.93947e-34	5.11855e-34	POR/UQCRH/ETFB/ETFA/COQ9/UQCRQ/NDUFV2/NDUFAB1/UQCR10/COX7A2/DLD/UQCRFS1/SOD2/UQCRB/UQCRC1/CYCS/NDUFS8/COX6C/UQCRC2/NDUFB10/SDHB/ETFDH/NDUFS3/CYC1/COX4I1/NDUFA8/SDHA/SDHC/NDUFV1/MT-ND5/MT-CO2/COX7A1/GHITM/NDUFA10/NDUFS2/MT-ND4/NDUFB9/NDUFA5/NDUFB4/NDUFB3	40	Protein
BP	GO:0042773	Atp synthesis coupled electron transport	35/390	101/18805	1.28832e-33	2.88097e-31	2.48278e-31	UQCRH/COQ9/UQCRQ/NDUFV2/NDUFAB1/UQCR10/COX7A2/DLD/UQCRFS1/UQCRB/UQCRC1/CYCS/NDUFS8/COX6C/UQCRC2/NDUFB10/SDHB/NDUFS3/CYC1/COX4I1/NDUFA8/SDHA/SDHC/NDUFV1/MT-ND5/MT-CO2/COX7A1/GHITM/NDUFA10/NDUFS2/MT-ND4/NDUFB9/NDUFA5/NDUFB4/NDUFB3	35	Protein
BP	GO:0042775	Mitochondrial atp synthesis coupled electron transport	35/390	101/18805	1.28832e-33	2.88097e-31	2.48278e-31	UQCRH/COQ9/UQCRQ/NDUFV2/NDUFAB1/UQCR10/COX7A2/DLD/UQCRFS1/UQCRB/UQCRC1/CYCS/NDUFS8/COX6C/UQCRC2/NDUFB10/SDHB/NDUFS3/CYC1/COX4I1/NDUFA8/SDHA/SDHC/NDUFV1/MT-ND5/MT-CO2/COX7A1/GHITM/NDUFA10/NDUFS2/MT-ND4/NDUFB9/NDUFA5/NDUFB4/NDUFB3	35	Protein
BP	GO:0019646	Aerobic electron transport chain	34/390	93/18805	1.30177e-33	2.88097e-31	2.48278e-31	UQCRH/COQ9/UQCRQ/NDUFV2/NDUFAB1/UQCR10/COX7A2/DLD/UQCRFS1/UQCRB/UQCRC1/CYCS/NDUFS8/COX6C/UQCRC2/NDUFB10/SDHB/NDUFS3/CYC1/COX4I1/NDUFA8/SDHA/SDHC/NDUFV1/MT-ND5/MT-CO2/COX7A1/NDUFA10/NDUFS2/MT-ND4/NDUFB9/NDUFA5/NDUFB4/NDUFB3	34	Protein
BP	GO:0006631	Fatty acid metabolic process	59/390	413/18805	2.06256e-32	4.29619e-30	3.70239e-30	AKR1C3/CES1/GSTP1/MIF/COMT/C3/DECR1/PCCA/GCDH/ACAA2/ACADM/HADHA/HADH/ETFB/ECHS1/ACAT1/PCCB/PECR/AUH/PDK1/ETFA/ECI1/OXSM/PCK2/ACADS/HSD17B10/HADHB/HSD17B12/ECH1/ACSF2/ECI2/NDUFAB1/ACADSB/ACADVL/ACSL1/APOC3/CRAT/MGST3/PCK1/IVD/APOC1/EHHADH/SCP2/FASN/ACACA/CPT2/ETFDH/HSD17B8/ECHDC3/ECHDC2/PDK2/ACOT1/MMUT/ACADL/CBR4/GPAM/ACAA1/MCEE/PDK4	59	Protein
BP	GO:0015986	Proton motive force-driven atp synthesis	31/390	77/18805	2.70338e-32	5.31816e-30	4.5831e-30	ATP5MG/ATP5MJ/NDUFV2/ATP5MK/NDUFAB1/NDUFA11/ATP5F1D/ATP5F1A/ATP5F1B/NDUFS8/ATP5ME/NDUFB10/SDHB/NDUFS3/NDUFA8/SDHA/ATP5PO/SDHC/NDUFV1/ATP5F1C/MT-ND5/MT-ATP8/ATP5PB/STOML2/NDUFA10/NDUFS2/MT-ND4/NDUFB9/NDUFA5/NDUFB4/NDUFB3	31	Protein
BP	GO:0042776	Proton motive force-driven mitochondrial atp synthesis	29/390	68/18805	3.57416e-31	6.66111e-29	5.74044e-29	ATP5MG/NDUFV2/NDUFAB1/NDUFA11/ATP5F1D/ATP5F1A/ATP5F1B/NDUFS8/ATP5ME/NDUFB10/SDHB/NDUFS3/NDUFA8/SDHA/ATP5PO/SDHC/NDUFV1/ATP5F1C/MT-ND5/MT-ATP8/ATP5PB/STOML2/NDUFA10/NDUFS2/MT-ND4/NDUFB9/NDUFA5/NDUFB4/NDUFB3	29	Protein
BP	GO:0007005	Mitochondrion organization	59/390	445/18805	1.32241e-30	2.34133e-28	2.01772e-28	HSPA4/ACAA2/HMGCL/SLC25A5/SLC25A4/AGK/NIPSNAP2/HK2/LETM1/AIFM1/PHB1/HSD17B10/SLC25A6/PHB2/SSBP1/HSPD1/ATPAF2/NDUFAB1/APOO/PPIF/HSPA9/COX7A2/NDUFA11/CLPP/UQCRFS1/SOD2/HTRA2/PYROXD2/UQCC2/TFAM/ATP5F1D/FAM162A/NDUFS8/NDUFB10/AFG3L2/NDUFS3/IMMT/LONP1/CHCHD3/NDUFA8/NUBPL/UQCC1/MT-ND5/TMEM126A/VDAC2/TFRC/COX7A1/STOML2/GHITM/NDUFA10/NDUFS2/MT-ND4/NDUFB9/TIMM50/MTX2/NDUFA5/TIMM13/NDUFB4/NDUFB3	59	Protein
BP	GO:0009081	Branched-chain amino acid metabolic process	20/390	26/18805	2.74053e-29	4.62105e-27	3.98235e-27	ALDH6A1/BCKDHA/PCCA/MCCC2/HMGCL/ECHS1/ACAT1/PCCB/HIBCH/AUH/BCKDHB/HSD17B10/BCAT2/MCCC1/HIBADH/DBT/ACADSB/DLD/ACAD8/IVD	20	Protein
BP	GO:0009145	Purine nucleoside triphosphate biosynthetic process	33/390	112/18805	4.23e-29	6.80838e-27	5.86736e-27	ADK/NME1/ATP5MG/ATP5MJ/NDUFV2/ATP5MK/NDUFAB1/NDUFA11/ATP5F1D/ATP5F1A/ATP5F1B/NDUFS8/ATP5ME/NDUFB10/SDHB/NDUFS3/NDUFA8/SDHA/ATP5PO/SDHC/NDUFV1/ATP5F1C/MT-ND5/MT-ATP8/ATP5PB/STOML2/NDUFA10/NDUFS2/MT-ND4/NDUFB9/NDUFA5/NDUFB4/NDUFB3	33	Protein
BP	GO:1902600	Proton transmembrane transport	40/390	190/18805	8.08255e-29	1.24436e-26	1.07237e-26	UQCRH/SLC25A5/SLC25A4/LETM1/ATP5MG/PHB2/NDUFV2/UQCR10/PPIF/SLC25A3/UQCRFS1/UQCRC1/ATP5F1D/ATP5F1A/ATP5F1B/NDUFS8/ATP5ME/NNT/NDUFB10/NDUFS3/CYC1/COX4I1/NDUFA8/CYB5A/ATP5PO/NDUFV1/ATP5F1C/MT-ND5/MT-CO2/MT-ATP8/ATP5PB/COX7A1/GHITM/NDUFA10/NDUFS2/MT-ND4/NDUFB9/NDUFA5/NDUFB4/NDUFB3	40	Protein
BP	GO:0072329	Monocarboxylic acid catabolic process	34/390	124/18805	8.87597e-29	1.26808e-26	1.09281e-26	DECR1/PCCA/GCDH/ACAA2/ACADM/HADHA/HADH/ETFB/DCXR/ECHS1/ACAT1/PCCB/AUH/LDHD/ETFA/ECI1/PCK2/ACADS/HSD17B10/HADHB/ECH1/ECI2/ACADVL/CRAT/PCK1/IVD/EHHADH/SCP2/CPT2/ETFDH/ECHDC2/ACADL/ACAA1/MCEE	34	Protein
BP	GO:0009062	Fatty acid catabolic process	32/390	105/18805	8.95284e-29	1.26808e-26	1.09281e-26	DECR1/PCCA/GCDH/ACAA2/ACADM/HADHA/HADH/ETFB/ECHS1/ACAT1/PCCB/AUH/ETFA/ECI1/PCK2/ACADS/HSD17B10/HADHB/ECH1/ECI2/ACADVL/CRAT/PCK1/IVD/EHHADH/SCP2/CPT2/ETFDH/ECHDC2/ACADL/ACAA1/MCEE	32	Protein
BP	GO:0009142	Nucleoside triphosphate biosynthetic process	34/390	125/18805	1.19669e-28	1.6298e-26	1.40454e-26	ADK/NME1/ATP5MG/ATP5MJ/NDUFV2/ATP5MK/NDUFAB1/NDUFA11/ATP5F1D/ATP5F1A/AK3/ATP5F1B/NDUFS8/ATP5ME/NDUFB10/SDHB/NDUFS3/NDUFA8/SDHA/ATP5PO/SDHC/NDUFV1/ATP5F1C/MT-ND5/MT-ATP8/ATP5PB/STOML2/NDUFA10/NDUFS2/MT-ND4/NDUFB9/NDUFA5/NDUFB4/NDUFB3	34	Protein
BP	GO:0006754	Atp biosynthetic process	31/390	100/18805	3.6319e-28	4.76317e-26	4.10483e-26	ATP5MG/ATP5MJ/NDUFV2/ATP5MK/NDUFAB1/NDUFA11/ATP5F1D/ATP5F1A/ATP5F1B/NDUFS8/ATP5ME/NDUFB10/SDHB/NDUFS3/NDUFA8/SDHA/ATP5PO/SDHC/NDUFV1/ATP5F1C/MT-ND5/MT-ATP8/ATP5PB/STOML2/NDUFA10/NDUFS2/MT-ND4/NDUFB9/NDUFA5/NDUFB4/NDUFB3	31	Protein
BP	GO:0009206	Purine ribonucleoside triphosphate biosynthetic process	32/390	111/18805	6.51832e-28	8.24334e-26	7.10398e-26	NME1/ATP5MG/ATP5MJ/NDUFV2/ATP5MK/NDUFAB1/NDUFA11/ATP5F1D/ATP5F1A/ATP5F1B/NDUFS8/ATP5ME/NDUFB10/SDHB/NDUFS3/NDUFA8/SDHA/ATP5PO/SDHC/NDUFV1/ATP5F1C/MT-ND5/MT-ATP8/ATP5PB/STOML2/NDUFA10/NDUFS2/MT-ND4/NDUFB9/NDUFA5/NDUFB4/NDUFB3	32	Protein
BP	GO:0009083	Branched-chain amino acid catabolic process	18/390	22/18805	2.31266e-27	2.82383e-25	2.43353e-25	ALDH6A1/BCKDHA/MCCC2/HMGCL/ECHS1/ACAT1/HIBCH/AUH/BCKDHB/HSD17B10/BCAT2/MCCC1/HIBADH/DBT/ACADSB/DLD/ACAD8/IVD	18	Protein
BP	GO:0009201	Ribonucleoside triphosphate biosynthetic process	32/390	117/18805	4.16622e-27	4.91752e-25	4.23784e-25	NME1/ATP5MG/ATP5MJ/NDUFV2/ATP5MK/NDUFAB1/NDUFA11/ATP5F1D/ATP5F1A/ATP5F1B/NDUFS8/ATP5ME/NDUFB10/SDHB/NDUFS3/NDUFA8/SDHA/ATP5PO/SDHC/NDUFV1/ATP5F1C/MT-ND5/MT-ATP8/ATP5PB/STOML2/NDUFA10/NDUFS2/MT-ND4/NDUFB9/NDUFA5/NDUFB4/NDUFB3	32	Protein
BP	GO:0006635	Fatty acid beta-oxidation	27/390	74/18805	7.03109e-27	8.03132e-25	6.92127e-25	DECR1/GCDH/ACAA2/ACADM/HADHA/HADH/ETFB/ECHS1/ACAT1/AUH/ETFA/ECI1/ACADS/HSD17B10/HADHB/ECH1/ECI2/ACADVL/CRAT/IVD/EHHADH/SCP2/CPT2/ETFDH/ECHDC2/ACADL/ACAA1	27	Protein
BP	GO:0006520	Amino acid metabolic process	45/390	283/18805	7.80143e-27	8.63277e-25	7.43959e-25	PSAT1/ALDH1A1/ALDH6A1/BCKDHA/PCCA/GCSH/GCDH/MCCC2/ETFB/ADHFE1/HMGCL/ECHS1/ACAT1/PCCB/HIBCH/AUH/ETFA/BCKDHB/DLST/HSD17B10/BCAT2/GLUD1/FH/MCCC1/HIBADH/DBT/WARS1/BPHL/ACADSB/DLD/ACAD8/ALDH5A1/IVD/GSTZ1/GPT2/IARS2/MMUT/DARS2/SARS2/DGLUCY/GLUL/KYAT3/SHMT2/FARSB/SHMT1	45	Protein
BP	GO:0046390	Ribose phosphate biosynthetic process	37/390	180/18805	2.50015e-26	2.68273e-24	2.31194e-24	ADK/PYGL/NME1/ATP5MG/ATP5MJ/AK2/NDUFV2/DHODH/ATP5MK/NDUFAB1/NDUFA11/ATP5F1D/ATP5F1A/AK3/ATP5F1B/NDUFS8/ATP5ME/NDUFB10/SDHB/NDUFS3/NDUFA8/SDHA/ATP5PO/SDHC/NDUFV1/ATP5F1C/MT-ND5/MT-ATP8/ATP5PB/STOML2/NDUFA10/NDUFS2/MT-ND4/NDUFB9/NDUFA5/NDUFB4/NDUFB3	37	Protein
BP	GO:0009152	Purine ribonucleotide biosynthetic process	35/390	157/18805	3.11452e-26	3.24368e-24	2.79535e-24	ADK/NME1/ATP5MG/ATP5MJ/AK2/NDUFV2/ATP5MK/NDUFAB1/NDUFA11/ATP5F1D/ATP5F1A/AK3/ATP5F1B/NDUFS8/ATP5ME/NDUFB10/SDHB/NDUFS3/NDUFA8/SDHA/ATP5PO/SDHC/NDUFV1/ATP5F1C/MT-ND5/MT-ATP8/ATP5PB/STOML2/NDUFA10/NDUFS2/MT-ND4/NDUFB9/NDUFA5/NDUFB4/NDUFB3	35	Protein
BP	GO:0006163	Purine nucleotide metabolic process	54/390	448/18805	5.78804e-26	5.85584e-24	5.04647e-24	NQO1/SULT1A1/ADK/LDHB/UCHL1/NUDT5/NME1/DCXR/MDH2/PCK2/HK2/PC/ATP5MG/ATP5MJ/AK2/HK1/NDUFV2/IDH2/ATP5MK/NDUFAB1/NDUFA11/SLC25A11/ATP5F1D/ATP5F1A/AK3/ATP5F1B/OGDH/ME2/NDUFS8/ATP5ME/NNT/NDUFB10/SDHB/NDUFS3/NADK2/NDUFA8/SDHA/ATP5PO/SDHC/NDUFV1/ATP5F1C/GPD1L/MT-ND5/MT-ATP8/GPD2/ATP5PB/STOML2/NDUFA10/NDUFS2/MT-ND4/NDUFB9/NDUFA5/NDUFB4/NDUFB3	54	Protein
BP	GO:0009260	Ribonucleotide biosynthetic process	36/390	173/18805	7.71008e-26	7.58372e-24	6.53553e-24	ADK/NME1/ATP5MG/ATP5MJ/AK2/NDUFV2/DHODH/ATP5MK/NDUFAB1/NDUFA11/ATP5F1D/ATP5F1A/AK3/ATP5F1B/NDUFS8/ATP5ME/NDUFB10/SDHB/NDUFS3/NDUFA8/SDHA/ATP5PO/SDHC/NDUFV1/ATP5F1C/MT-ND5/MT-ATP8/ATP5PB/STOML2/NDUFA10/NDUFS2/MT-ND4/NDUFB9/NDUFA5/NDUFB4/NDUFB3	36	Protein
BP	GO:0006099	Tricarboxylic acid cycle	20/390	34/18805	1.42399e-25	1.3628e-23	1.17444e-23	CS/SUCLA2/SUCLG1/DLAT/MDH2/ACO2/SUCLG2/PDHB/PDHA1/IDH3G/IDH3B/DLST/FH/IDH3A/IDH2/OGDH/NNT/SDHB/SDHA/SDHC	20	Protein
BP	GO:0009063	Amino acid catabolic process	30/390	111/18805	2.60816e-25	2.43039e-23	2.09447e-23	ALDH6A1/BCKDHA/GCSH/MCCC2/ETFB/ADHFE1/HMGCL/ECHS1/ACAT1/HIBCH/AUH/ETFA/BCKDHB/DLST/HSD17B10/BCAT2/GLUD1/MCCC1/HIBADH/DBT/ACADSB/DLD/ACAD8/ALDH5A1/IVD/GSTZ1/GPT2/GLUL/KYAT3/SHMT1	30	Protein
BP	GO:0006637	Acyl-coa metabolic process	28/390	100/18805	3.61776e-24	3.20262e-22	2.75997e-22	GCDH/PDHX/SUCLA2/SUCLG1/ACAT1/DLAT/SUCLG2/PDHB/PDHA1/PDK1/OXSM/DLST/HSD17B12/ACSF2/DLD/ACSL1/OGDH/MPC2/FASN/ACACA/PDK2/ACOT1/MMUT/CBR4/GPAM/DGAT1/MCEE/PDK4	28	Protein
BP	GO:0035383	Thioester metabolic process	28/390	100/18805	3.61776e-24	3.20262e-22	2.75997e-22	GCDH/PDHX/SUCLA2/SUCLG1/ACAT1/DLAT/SUCLG2/PDHB/PDHA1/PDK1/OXSM/DLST/HSD17B12/ACSF2/DLD/ACSL1/OGDH/MPC2/FASN/ACACA/PDK2/ACOT1/MMUT/CBR4/GPAM/DGAT1/MCEE/PDK4	28	Protein
BP	GO:0009165	Nucleotide biosynthetic process	39/390	234/18805	3.85282e-24	3.32752e-22	2.8676e-22	ADK/NME1/ATP5MG/ATP5MJ/AK2/NDUFV2/DHODH/ATP5MK/NDUFAB1/NDUFA11/DUT/ATP5F1D/ATP5F1A/AK3/ATP5F1B/NDUFS8/ATP5ME/NDUFB10/SDHB/NDUFS3/NADK2/NDUFA8/SDHA/ATP5PO/SDHC/NDUFV1/ATP5F1C/MT-ND5/MT-ATP8/ATP5PB/STOML2/NDUFA10/NDUFS2/MT-ND4/NDUFB9/SHMT1/NDUFA5/NDUFB4/NDUFB3	39	Protein
BP	GO:0006164	Purine nucleotide biosynthetic process	36/390	198/18805	1.05872e-23	8.92602e-22	7.6923e-22	ADK/NME1/ATP5MG/ATP5MJ/AK2/NDUFV2/ATP5MK/NDUFAB1/NDUFA11/ATP5F1D/ATP5F1A/AK3/ATP5F1B/NDUFS8/ATP5ME/NDUFB10/SDHB/NDUFS3/NADK2/NDUFA8/SDHA/ATP5PO/SDHC/NDUFV1/ATP5F1C/MT-ND5/MT-ATP8/ATP5PB/STOML2/NDUFA10/NDUFS2/MT-ND4/NDUFB9/NDUFA5/NDUFB4/NDUFB3	36	Protein
BP	GO:0009144	Purine nucleoside triphosphate metabolic process	40/390	261/18805	2.54002e-23	2.09168e-21	1.80258e-21	ADK/UCHL1/NUDT5/NME1/HK2/ATP5MG/ATP5MJ/AK2/HK1/NDUFV2/ATP5MK/NDUFAB1/NDUFA11/ATP5F1D/ATP5F1A/AK3/ATP5F1B/OGDH/NDUFS8/ATP5ME/NDUFB10/SDHB/NDUFS3/NDUFA8/SDHA/ATP5PO/SDHC/NDUFV1/ATP5F1C/MT-ND5/MT-ATP8/ATP5PB/STOML2/NDUFA10/NDUFS2/MT-ND4/NDUFB9/NDUFA5/NDUFB4/NDUFB3	40	Protein
BP	GO:0009141	Nucleoside triphosphate metabolic process	41/390	277/18805	2.73946e-23	2.20464e-21	1.89993e-21	ADK/UCHL1/NUDT5/NME1/HK2/ATP5MG/ATP5MJ/AK2/HK1/NDUFV2/ATP5MK/NDUFAB1/NDUFA11/DUT/ATP5F1D/ATP5F1A/AK3/ATP5F1B/OGDH/NDUFS8/ATP5ME/NDUFB10/SDHB/NDUFS3/NDUFA8/SDHA/ATP5PO/SDHC/NDUFV1/ATP5F1C/MT-ND5/MT-ATP8/ATP5PB/STOML2/NDUFA10/NDUFS2/MT-ND4/NDUFB9/NDUFA5/NDUFB4/NDUFB3	41	Protein
BP	GO:0019395	Fatty acid oxidation	28/390	107/18805	2.85251e-23	2.24461e-21	1.93437e-21	DECR1/GCDH/ACAA2/ACADM/HADHA/HADH/ETFB/ECHS1/ACAT1/AUH/ETFA/ECI1/ACADS/HSD17B10/HADHB/ECH1/ECI2/ACADVL/CRAT/IVD/EHHADH/SCP2/CPT2/ETFDH/ECHDC2/ACADL/ACAA1/PDK4	28	Protein
BP	GO:0009205	Purine ribonucleoside triphosphate metabolic process	39/390	254/18805	8.6092e-23	6.62722e-21	5.71123e-21	UCHL1/NUDT5/NME1/HK2/ATP5MG/ATP5MJ/AK2/HK1/NDUFV2/ATP5MK/NDUFAB1/NDUFA11/ATP5F1D/ATP5F1A/AK3/ATP5F1B/OGDH/NDUFS8/ATP5ME/NDUFB10/SDHB/NDUFS3/NDUFA8/SDHA/ATP5PO/SDHC/NDUFV1/ATP5F1C/MT-ND5/MT-ATP8/ATP5PB/STOML2/NDUFA10/NDUFS2/MT-ND4/NDUFB9/NDUFA5/NDUFB4/NDUFB3	39	Protein
BP	GO:0034440	Lipid oxidation	28/390	114/18805	1.9146e-22	1.44247e-20	1.2431e-20	DECR1/GCDH/ACAA2/ACADM/HADHA/HADH/ETFB/ECHS1/ACAT1/AUH/ETFA/ECI1/ACADS/HSD17B10/HADHB/ECH1/ECI2/ACADVL/CRAT/IVD/EHHADH/SCP2/CPT2/ETFDH/ECHDC2/ACADL/ACAA1/PDK4	28	Protein
BP	GO:0046034	Atp metabolic process	37/390	230/18805	2.14293e-22	1.58086e-20	1.36236e-20	UCHL1/NUDT5/HK2/ATP5MG/ATP5MJ/AK2/HK1/NDUFV2/ATP5MK/NDUFAB1/NDUFA11/ATP5F1D/ATP5F1A/ATP5F1B/OGDH/NDUFS8/ATP5ME/NDUFB10/SDHB/NDUFS3/NDUFA8/SDHA/ATP5PO/SDHC/NDUFV1/ATP5F1C/MT-ND5/MT-ATP8/ATP5PB/STOML2/NDUFA10/NDUFS2/MT-ND4/NDUFB9/NDUFA5/NDUFB4/NDUFB3	37	Protein
BP	GO:0009199	Ribonucleoside triphosphate metabolic process	39/390	261/18805	2.38118e-22	1.72077e-20	1.48293e-20	UCHL1/NUDT5/NME1/HK2/ATP5MG/ATP5MJ/AK2/HK1/NDUFV2/ATP5MK/NDUFAB1/NDUFA11/ATP5F1D/ATP5F1A/AK3/ATP5F1B/OGDH/NDUFS8/ATP5ME/NDUFB10/SDHB/NDUFS3/NDUFA8/SDHA/ATP5PO/SDHC/NDUFV1/ATP5F1C/MT-ND5/MT-ATP8/ATP5PB/STOML2/NDUFA10/NDUFS2/MT-ND4/NDUFB9/NDUFA5/NDUFB4/NDUFB3	39	Protein
BP	GO:0019693	Ribose phosphate metabolic process	43/390	379/18805	8.76616e-20	6.20819e-18	5.35013e-18	SULT1A1/ADK/PYGL/UCHL1/NUDT5/NME1/HK2/ATP5MG/ATP5MJ/AK2/HK1/NDUFV2/DHODH/ATP5MK/NDUFAB1/NDUFA11/ATP5F1D/ATP5F1A/AK3/ATP5F1B/OGDH/NDUFS8/ATP5ME/NDUFB10/SDHB/NDUFS3/NDUFA8/SDHA/ATP5PO/SDHC/NDUFV1/ATP5F1C/MT-ND5/MT-ATP8/ATP5PB/STOML2/NDUFA10/NDUFS2/MT-ND4/NDUFB9/NDUFA5/NDUFB4/NDUFB3	43	Protein
BP	GO:0009150	Purine ribonucleotide metabolic process	41/390	350/18805	2.03966e-19	1.38893e-17	1.19696e-17	SULT1A1/ADK/UCHL1/NUDT5/NME1/HK2/ATP5MG/ATP5MJ/AK2/HK1/NDUFV2/ATP5MK/NDUFAB1/NDUFA11/ATP5F1D/ATP5F1A/AK3/ATP5F1B/OGDH/NDUFS8/ATP5ME/NDUFB10/SDHB/NDUFS3/NDUFA8/SDHA/ATP5PO/SDHC/NDUFV1/ATP5F1C/MT-ND5/MT-ATP8/ATP5PB/STOML2/NDUFA10/NDUFS2/MT-ND4/NDUFB9/NDUFA5/NDUFB4/NDUFB3	41	Protein
BP	GO:0016042	Lipid catabolic process	41/390	350/18805	2.03966e-19	1.38893e-17	1.19696e-17	PLPP1/AKR1C3/CES1/DECR1/PCCA/GCDH/ACAA2/ACADM/HADHA/HADH/ETFB/ECHS1/ACAT1/PCCB/AUH/ETFA/ECI1/PCK2/ACADS/HSD17B10/HADHB/ECH1/ECI2/HINT2/OXCT1/ACADVL/APOC3/CRAT/APOB/PCK1/IVD/APOC1/EHHADH/SCP2/CPT2/ETFDH/ECHDC2/ACADL/ACAA1/MCEE/MGST2	41	Protein
BP	GO:0009259	Ribonucleotide metabolic process	42/390	371/18805	2.62218e-19	1.75191e-17	1.50977e-17	SULT1A1/ADK/UCHL1/NUDT5/NME1/HK2/ATP5MG/ATP5MJ/AK2/HK1/NDUFV2/DHODH/ATP5MK/NDUFAB1/NDUFA11/ATP5F1D/ATP5F1A/AK3/ATP5F1B/OGDH/NDUFS8/ATP5ME/NDUFB10/SDHB/NDUFS3/NDUFA8/SDHA/ATP5PO/SDHC/NDUFV1/ATP5F1C/MT-ND5/MT-ATP8/ATP5PB/STOML2/NDUFA10/NDUFS2/MT-ND4/NDUFB9/NDUFA5/NDUFB4/NDUFB3	42	Protein
BP	GO:0006790	Sulfur compound metabolic process	39/390	329/18805	1.06972e-18	7.01457e-17	6.04505e-17	GSTT1/SULT1A1/GSTP1/GCDH/PDHX/MCCC2/SUCLA2/SUCLG1/TST/ACAT1/DLAT/SLC25A10/SUCLG2/PDHB/PDHA1/PDK1/OXSM/SUOX/DLST/MCCC1/HSD17B12/ACSF2/DLD/ACSL1/SOD2/OGDH/MPC2/GSTZ1/FASN/ACACA/PDK2/ACOT1/MMUT/CBR4/GPAM/DGAT1/MCEE/PDK4/MGST2	39	Protein
BP	GO:0033108	Mitochondrial respiratory chain complex assembly	25/390	122/18805	4.07962e-18	2.62654e-16	2.26351e-16	AIFM1/ATPAF2/NDUFAB1/COX7A2/NDUFA11/UQCRFS1/UQCC2/TFAM/ATP5F1D/NDUFS8/NDUFB10/NDUFS3/NDUFA8/NUBPL/UQCC1/MT-ND5/TMEM126A/COX7A1/NDUFA10/NDUFS2/MT-ND4/NDUFB9/NDUFA5/NDUFB4/NDUFB3	25	Protein
BP	GO:0030258	Lipid modification	30/390	194/18805	7.28419e-18	4.60595e-16	3.96934e-16	PLPP1/DECR1/GCDH/ACAA2/ACADM/HADHA/HADH/ETFB/ECHS1/ACAT1/AUH/ETFA/ECI1/AGK/ACADS/HSD17B10/HADHB/ECH1/ECI2/ACADVL/CRAT/IVD/EHHADH/SCP2/CPT2/ETFDH/ECHDC2/ACADL/ACAA1/PDK4	30	Protein
BP	GO:1901606	Alpha-amino acid catabolic process	22/390	98/18805	5.44614e-17	3.38329e-15	2.91567e-15	ALDH6A1/GCSH/MCCC2/ADHFE1/HMGCL/ACAT1/HIBCH/AUH/DLST/HSD17B10/BCAT2/GLUD1/MCCC1/HIBADH/ACADSB/ACAD8/IVD/GSTZ1/GPT2/GLUL/KYAT3/SHMT1	22	Protein
BP	GO:0043648	Dicarboxylic acid metabolic process	22/390	100/18805	8.64352e-17	5.27702e-15	4.54765e-15	SUCLA2/ADHFE1/MDH2/SUCLG2/PCK2/DLST/GLUD1/FH/FAHD2A/IDH2/DLD/ALDH5A1/PCK1/OGDH/ME2/GPT2/SDHA/DGLUCY/GLUL/KYAT3/SHMT1/L2HGDH	22	Protein
BP	GO:0043603	Amide metabolic process	44/390	480/18805	1.13529e-16	6.81365e-15	5.8719e-15	PLPP1/GSTT1/GSTP1/BIN1/GCDH/PDHX/MCCC2/SUCLA2/SUCLG1/ACAT1/DLAT/SUCLG2/PDHB/PDHA1/PDK1/AGK/OXSM/MME/DLST/FH/MCCC1/HSD17B12/ACSF2/DLD/ACSL1/SOD2/HTRA2/OGDH/MPC2/GSTZ1/FASN/ACACA/PDK2/ACOT1/MMUT/CBR4/GPAM/ABCA8/CTSZ/DGAT1/MCEE/PDK4/SHMT1/MGST2	44	Protein
BP	GO:0006839	Mitochondrial transport	28/390	183/18805	1.25591e-16	7.41198e-15	6.38753e-15	HSPA4/GRPEL1/ACAA2/TST/SLC25A1/SLC25A5/SLC25A4/AGK/HK2/LETM1/AIFM1/SLC25A6/TMEM14C/HSPD1/PPIF/HSPA9/SLC25A3/PMPCB/MPC2/CPT2/AFG3L2/SLC25A20/VDAC2/SLC25A24/GHITM/TIMM50/MTX2/TIMM13	28	Protein
BP	GO:0006120	Mitochondrial electron transport, nadh to ubiquinone	17/390	51/18805	1.33331e-16	7.49404e-15	6.45824e-15	COQ9/NDUFV2/NDUFAB1/DLD/NDUFS8/NDUFB10/NDUFS3/NDUFA8/NDUFV1/MT-ND5/NDUFA10/NDUFS2/MT-ND4/NDUFB9/NDUFA5/NDUFB4/NDUFB3	17	Protein
BP	GO:0035384	Thioester biosynthetic process	17/390	51/18805	1.33331e-16	7.49404e-15	6.45824e-15	GCDH/PDHX/ACAT1/DLAT/PDHB/PDHA1/PDK1/HSD17B12/DLD/ACSL1/MPC2/FASN/ACACA/PDK2/MMUT/CBR4/PDK4	17	Protein
BP	GO:0071616	Acyl-coa biosynthetic process	17/390	51/18805	1.33331e-16	7.49404e-15	6.45824e-15	GCDH/PDHX/ACAT1/DLAT/PDHB/PDHA1/PDK1/HSD17B12/DLD/ACSL1/MPC2/FASN/ACACA/PDK2/MMUT/CBR4/PDK4	17	Protein
BP	GO:1901605	Alpha-amino acid metabolic process	29/390	203/18805	2.34428e-16	1.29704e-14	1.11777e-14	PSAT1/ALDH6A1/GCSH/GCDH/MCCC2/ADHFE1/HMGCL/ACAT1/HIBCH/AUH/DLST/HSD17B10/BCAT2/GLUD1/FH/MCCC1/HIBADH/ACADSB/ACAD8/ALDH5A1/IVD/GSTZ1/GPT2/MMUT/DGLUCY/GLUL/KYAT3/SHMT2/SHMT1	29	Protein
BP	GO:0010257	Nadh dehydrogenase complex assembly	17/390	63/18805	7.28646e-15	3.90929e-13	3.36897e-13	AIFM1/NDUFAB1/NDUFA11/NDUFS8/NDUFB10/NDUFS3/NDUFA8/NUBPL/MT-ND5/TMEM126A/NDUFA10/NDUFS2/MT-ND4/NDUFB9/NDUFA5/NDUFB4/NDUFB3	17	Protein
BP	GO:0032981	Mitochondrial respiratory chain complex i assembly	17/390	63/18805	7.28646e-15	3.90929e-13	3.36897e-13	AIFM1/NDUFAB1/NDUFA11/NDUFS8/NDUFB10/NDUFS3/NDUFA8/NUBPL/MT-ND5/TMEM126A/NDUFA10/NDUFS2/MT-ND4/NDUFB9/NDUFA5/NDUFB4/NDUFB3	17	Protein
BP	GO:1990542	Mitochondrial transmembrane transport	20/390	98/18805	1.04144e-14	5.50411e-13	4.74335e-13	GRPEL1/TST/SLC25A1/SLC25A5/SLC25A4/LETM1/AIFM1/SLC25A6/HSPD1/HSPA9/SLC25A3/PMPCB/MPC2/CPT2/AFG3L2/SLC25A20/VDAC2/SLC25A24/GHITM/TIMM50	20	Protein
BP	GO:0033539	Fatty acid beta-oxidation using acyl-coa dehydrogenase	9/390	12/18805	1.34899e-13	7.02465e-12	6.05373e-12	GCDH/ACADM/ETFB/ETFA/ACADS/ACADVL/IVD/ETFDH/ACADL	9	Protein
BP	GO:0007006	Mitochondrial membrane organization	20/390	120/18805	5.91121e-13	3.03357e-11	2.61428e-11	HSPA4/ACAA2/SLC25A5/SLC25A4/AGK/HK2/LETM1/SLC25A6/APOO/PPIF/HSPA9/AFG3L2/IMMT/CHCHD3/TMEM126A/VDAC2/GHITM/TIMM50/MTX2/TIMM13	20	Protein
BP	GO:0006086	Pyruvate decarboxylation to acetyl-coa	9/390	14/18805	1.18322e-12	5.90109e-11	5.08547e-11	PDHX/DLAT/PDHB/PDHA1/PDK1/DLD/MPC2/PDK2/PDK4	9	Protein
BP	GO:0006122	Mitochondrial electron transport, ubiquinol to cytochrome c	9/390	14/18805	1.18322e-12	5.90109e-11	5.08547e-11	UQCRH/UQCRQ/UQCR10/UQCRFS1/UQCRB/UQCRC1/CYCS/UQCRC2/CYC1	9	Protein
BP	GO:0006085	Acetyl-coa biosynthetic process	10/390	21/18805	3.77816e-12	1.85812e-10	1.6013e-10	PDHX/ACAT1/DLAT/PDHB/PDHA1/PDK1/DLD/MPC2/PDK2/PDK4	10	Protein
BP	GO:0006084	Acetyl-coa metabolic process	12/390	36/18805	4.27652e-12	2.07441e-10	1.78769e-10	PDHX/ACAT1/DLAT/PDHB/PDHA1/PDK1/DLST/DLD/MPC2/ACACA/PDK2/PDK4	12	Protein
BP	GO:0046459	Short-chain fatty acid metabolic process	9/390	16/18805	6.51699e-12	3.11847e-10	2.68745e-10	PCCA/PCCB/OXSM/PCK2/ACADS/CRAT/PCK1/MMUT/MCEE	9	Protein
BP	GO:0046394	Carboxylic acid biosynthetic process	30/390	334/18805	1.73164e-11	8.17567e-10	7.04566e-10	AKR1C3/CES1/GSTP1/PSAT1/UGP2/MIF/ALDH1A1/SUCLA2/PECR/OXSM/HSD17B10/BCAT2/GLUD1/HSD17B12/NDUFAB1/ACADVL/APOC3/MGST3/APOC1/SCP2/FASN/ACACA/HSD17B8/ACADL/CBR4/GLUL/SHMT2/PDK4/SHMT1/MGST2	30	Protein
BP	GO:0016053	Organic acid biosynthetic process	30/390	337/18805	2.16622e-11	1.00929e-09	8.69788e-10	AKR1C3/CES1/GSTP1/PSAT1/UGP2/MIF/ALDH1A1/SUCLA2/PECR/OXSM/HSD17B10/BCAT2/GLUD1/HSD17B12/NDUFAB1/ACADVL/APOC3/MGST3/APOC1/SCP2/FASN/ACACA/HSD17B8/ACADL/CBR4/GLUL/SHMT2/PDK4/SHMT1/MGST2	30	Protein
BP	GO:0006066	Alcohol metabolic process	31/390	368/18805	4.07662e-11	1.87471e-09	1.6156e-09	PLPP1/AKR1C3/SULT1A1/CES1/MAPK1/RDH5/ALDH1A1/ACAA2/COQ3/ACO2/PECR/AGK/PCK2/IDH3G/IDH3B/ALDH1B1/IDH3A/IDH2/ACADVL/ADH1B/ADH1C/APOB/PCK1/FECH/APOC1/SCP2/TM7SF2/ACADL/CBR4/DGAT1/GPD2	31	Protein
BP	GO:0043604	Amide biosynthetic process	21/390	176/18805	1.12787e-10	5.12022e-09	4.41253e-09	GCDH/PDHX/ACAT1/DLAT/PDHB/PDHA1/PDK1/AGK/FH/HSD17B12/DLD/ACSL1/MPC2/FASN/ACACA/PDK2/MMUT/CBR4/ABCA8/PDK4/MGST2	21	Protein
BP	GO:0006090	Pyruvate metabolic process	18/390	127/18805	1.41174e-10	6.32781e-09	5.45321e-09	LDHB/UCHL1/PDHX/DLAT/PDHB/PDHA1/PDK1/PCK2/HK2/PC/HK1/DLD/PCK1/OGDH/MPC2/ME2/PDK2/PDK4	18	Protein
BP	GO:0072350	Tricarboxylic acid metabolic process	8/390	16/18805	3.54714e-10	1.57005e-08	1.35305e-08	CS/ACO2/IDH3G/IDH3B/GLUD1/IDH3A/IDH2/PCK1	8	Protein
BP	GO:0019626	Short-chain fatty acid catabolic process	6/390	7/18805	5.26912e-10	2.30345e-08	1.98508e-08	PCCA/PCCB/PCK2/ACADS/PCK1/MCEE	6	Protein
BP	GO:0006103	2-oxoglutarate metabolic process	8/390	18/18805	1.16292e-09	5.02182e-08	4.32773e-08	ADHFE1/DLST/IDH2/DLD/OGDH/GPT2/KYAT3/L2HGDH	8	Protein
BP	GO:0007007	Inner mitochondrial membrane organization	11/390	45/18805	1.4307e-09	6.10373e-08	5.2601e-08	AGK/LETM1/APOO/HSPA9/AFG3L2/IMMT/CHCHD3/TMEM126A/GHITM/MTX2/TIMM13	11	Protein
BP	GO:0170033	L-amino acid metabolic process	19/390	167/18805	1.98031e-09	8.24974e-08	7.1095e-08	PSAT1/GCDH/MCCC2/ADHFE1/HMGCL/AUH/DLST/BCAT2/GLUD1/MCCC1/ALDH5A1/IVD/GSTZ1/GPT2/DGLUCY/GLUL/KYAT3/SHMT2/SHMT1	19	Protein
BP	GO:0170039	Proteinogenic amino acid metabolic process	19/390	167/18805	1.98031e-09	8.24974e-08	7.1095e-08	PSAT1/GCSH/GCDH/MCCC2/ADHFE1/HMGCL/AUH/DLST/BCAT2/GLUD1/MCCC1/ALDH5A1/IVD/GSTZ1/GPT2/DGLUCY/GLUL/SHMT2/SHMT1	19	Protein
BP	GO:0006551	L-leucine metabolic process	6/390	8/18805	2.07076e-09	8.52623e-08	7.34777e-08	MCCC2/HMGCL/AUH/BCAT2/MCCC1/IVD	6	Protein
BP	GO:0009078	Pyruvate family amino acid metabolic process	7/390	13/18805	2.4109e-09	9.74666e-08	8.39952e-08	MCCC2/HMGCL/AUH/BCAT2/MCCC1/IVD/GPT2	7	Protein
BP	GO:0044272	Sulfur compound biosynthetic process	19/390	169/18805	2.42221e-09	9.74666e-08	8.39952e-08	GSTP1/GCDH/PDHX/ACAT1/DLAT/PDHB/PDHA1/PDK1/HSD17B12/DLD/ACSL1/MPC2/FASN/ACACA/PDK2/MMUT/CBR4/PDK4/MGST2	19	Protein
BP	GO:0170035	L-amino acid catabolic process	13/390	77/18805	5.95274e-09	2.34207e-07	2.01836e-07	MCCC2/ADHFE1/HMGCL/AUH/DLST/GLUD1/MCCC1/IVD/GSTZ1/GPT2/GLUL/KYAT3/SHMT1	13	Protein
BP	GO:0170040	Proteinogenic amino acid catabolic process	13/390	77/18805	5.95274e-09	2.34207e-07	2.01836e-07	GCSH/MCCC2/ADHFE1/HMGCL/AUH/DLST/GLUD1/MCCC1/IVD/GSTZ1/GPT2/GLUL/SHMT1	13	Protein
BP	GO:1990748	Cellular detoxification	16/390	125/18805	6.86139e-09	2.66991e-07	2.30089e-07	NQO1/HBG1/TXN/GSTT1/GSTP1/ALDH1A1/TXNRD1/HP/TXNRD2/SOD2/MTARC1/MGST3/GSTZ1/NNT/MTARC2/MGST2	16	Protein
BP	GO:0042180	Ketone metabolic process	21/390	227/18805	1.1983e-08	4.61214e-07	3.97467e-07	NQO1/AKR1C3/CES1/COQ8A/COQ3/PDK1/COQ9/HSD17B10/OXCT1/COQ6/ACADVL/APOC3/APOC1/SCP2/COQ5/PDK2/ACADL/CBR4/KYAT3/PDK4/COQ7	21	Protein
BP	GO:0072524	Pyridine-containing compound metabolic process	19/390	187/18805	1.30891e-08	4.98372e-07	4.29489e-07	NQO1/PSAT1/PNPO/LDHB/UCHL1/DCXR/MDH2/PCK2/HK2/PC/HK1/IDH2/SLC25A11/OGDH/ME2/NNT/NADK2/GPD1L/GPD2	19	Protein
BP	GO:0006104	Succinyl-coa metabolic process	6/390	10/18805	1.4992e-08	5.58809e-07	4.81573e-07	SUCLA2/SUCLG1/SUCLG2/DLST/OGDH/MMUT	6	Protein
BP	GO:0009080	Pyruvate family amino acid catabolic process	6/390	10/18805	1.4992e-08	5.58809e-07	4.81573e-07	MCCC2/HMGCL/AUH/MCCC1/IVD/GPT2	6	Protein
BP	GO:0097237	Cellular response to toxic substance	16/390	135/18805	2.10318e-08	7.75766e-07	6.68543e-07	NQO1/HBG1/TXN/GSTT1/GSTP1/ALDH1A1/TXNRD1/HP/TXNRD2/SOD2/MTARC1/MGST3/GSTZ1/NNT/MTARC2/MGST2	16	Protein
BP	GO:0006102	Isocitrate metabolic process	5/390	6/18805	2.2064e-08	7.97231e-07	6.87041e-07	ACO2/IDH3G/IDH3B/IDH3A/IDH2	5	Protein
BP	GO:0006552	L-leucine catabolic process	5/390	6/18805	2.2064e-08	7.97231e-07	6.87041e-07	MCCC2/HMGCL/AUH/MCCC1/IVD	5	Protein
BP	GO:0006577	Amino-acid betaine metabolic process	7/390	17/18805	2.543e-08	9.09571e-07	7.83854e-07	ACADM/TMLHE/ALDH7A1/CRAT/CPT2/ACADL/SHMT1	7	Protein
BP	GO:0072655	Establishment of protein localization to mitochondrion	15/390	127/18805	6.10654e-08	2.14715e-06	1.85038e-06	CSNK2A2/HSPA4/GRPEL1/AGK/HK2/AIFM1/HSPD1/PMPCA/HK1/HTRA2/PMPCB/TMEM126A/TIMM50/MTX2/TIMM13	15	Protein
BP	GO:0009636	Response to toxic substance	22/390	272/18805	6.12431e-08	2.14715e-06	1.85038e-06	NQO1/HBG1/TXN/GSTT1/CES1/GSTP1/COMT/ALDH1A1/TXNRD1/HP/AIFM1/BPHL/TXNRD2/SOD2/HTRA2/MTARC1/MGST3/FECH/GSTZ1/NNT/MTARC2/MGST2	22	Protein
BP	GO:0006743	Ubiquinone metabolic process	7/390	19/18805	6.35644e-08	2.20668e-06	1.90169e-06	NQO1/COQ8A/COQ3/COQ9/COQ6/COQ5/COQ7	7	Protein
BP	GO:0006573	Valine metabolic process	5/390	7/18805	7.59067e-08	2.60957e-06	2.24889e-06	ALDH6A1/HIBCH/BCAT2/HIBADH/ACAD8	5	Protein
BP	GO:0009437	Carnitine metabolic process	6/390	13/18805	1.16194e-07	3.95618e-06	3.40937e-06	ACADM/TMLHE/CRAT/CPT2/ACADL/SHMT1	6	Protein
BP	GO:0098869	Cellular oxidant detoxification	13/390	99/18805	1.32747e-07	4.47674e-06	3.85799e-06	NQO1/HBG1/TXN/GSTT1/GSTP1/TXNRD1/HP/TXNRD2/SOD2/MGST3/GSTZ1/NNT/MGST2	13	Protein
BP	GO:0070585	Protein localization to mitochondrion	15/390	135/18805	1.3848e-07	4.62601e-06	3.98662e-06	CSNK2A2/HSPA4/GRPEL1/AGK/HK2/AIFM1/HSPD1/PMPCA/HK1/HTRA2/PMPCB/TMEM126A/TIMM50/MTX2/TIMM13	15	Protein
BP	GO:1901661	Quinone metabolic process	7/390	22/18805	2.03874e-07	6.74691e-06	5.81438e-06	NQO1/COQ8A/COQ3/COQ9/COQ6/COQ5/COQ7	7	Protein
BP	GO:0019362	Pyridine nucleotide metabolic process	17/390	180/18805	2.22177e-07	7.21771e-06	6.22011e-06	NQO1/LDHB/UCHL1/DCXR/MDH2/PCK2/HK2/PC/HK1/IDH2/SLC25A11/OGDH/ME2/NNT/NADK2/GPD1L/GPD2	17	Protein
BP	GO:0046496	Nicotinamide nucleotide metabolic process	17/390	180/18805	2.22177e-07	7.21771e-06	6.22011e-06	NQO1/LDHB/UCHL1/DCXR/MDH2/PCK2/HK2/PC/HK1/IDH2/SLC25A11/OGDH/ME2/NNT/NADK2/GPD1L/GPD2	17	Protein
BP	GO:0072330	Monocarboxylic acid biosynthetic process	19/390	229/18805	3.32133e-07	1.06916e-05	9.2139e-06	AKR1C3/CES1/GSTP1/MIF/PECR/OXSM/HSD17B10/HSD17B12/NDUFAB1/ACADVL/APOC3/APOC1/SCP2/FASN/ACACA/HSD17B8/ACADL/CBR4/PDK4	19	Protein
BP	GO:0098754	Detoxification	16/390	168/18805	4.50751e-07	1.43794e-05	1.23919e-05	NQO1/HBG1/TXN/GSTT1/GSTP1/ALDH1A1/TXNRD1/HP/TXNRD2/SOD2/MTARC1/MGST3/GSTZ1/NNT/MTARC2/MGST2	16	Protein
BP	GO:0006633	Fatty acid biosynthetic process	16/390	170/18805	5.29303e-07	1.67345e-05	1.44215e-05	AKR1C3/GSTP1/MIF/PECR/OXSM/HSD17B12/NDUFAB1/ACADVL/APOC3/APOC1/FASN/ACACA/HSD17B8/ACADL/CBR4/PDK4	16	Protein
BP	GO:1901568	Fatty acid derivative metabolic process	11/390	79/18805	6.7743e-07	2.12281e-05	1.82941e-05	GCDH/HMGCL/ACAT1/PECR/HSD17B12/OXCT1/ACSL1/FASN/ACACA/CBR4/DGAT1	11	Protein
BP	GO:0006744	Ubiquinone biosynthetic process	6/390	17/18805	7.80995e-07	2.40479e-05	2.07241e-05	COQ8A/COQ3/COQ9/COQ6/COQ5/COQ7	6	Protein
BP	GO:1901663	Quinone biosynthetic process	6/390	17/18805	7.80995e-07	2.40479e-05	2.07241e-05	COQ8A/COQ3/COQ9/COQ6/COQ5/COQ7	6	Protein
BP	GO:0006549	Isoleucine metabolic process	4/390	5/18805	8.96148e-07	2.73557e-05	2.35747e-05	ACAT1/HSD17B10/BCAT2/ACADSB	4	Protein
BP	GO:0046949	Fatty-acyl-coa biosynthetic process	7/390	28/18805	1.27123e-06	3.84738e-05	3.31561e-05	GCDH/ACAT1/HSD17B12/ACSL1/FASN/ACACA/CBR4	7	Protein
BP	GO:0006734	Nadh metabolic process	8/390	40/18805	1.37074e-06	4.11339e-05	3.54486e-05	NQO1/MDH2/PCK2/HK2/PC/HK1/SLC25A11/GPD2	8	Protein
BP	GO:0035337	Fatty-acyl-coa metabolic process	8/390	41/18805	1.67247e-06	4.97666e-05	4.28881e-05	GCDH/ACAT1/HSD17B12/ACSL1/FASN/ACACA/CBR4/DGAT1	8	Protein
BP	GO:0008637	Apoptotic mitochondrial changes	12/390	107/18805	2.25153e-06	6.64389e-05	5.7256e-05	ACAA2/SLC25A5/SLC25A4/HK2/SLC25A6/HSPD1/PPIF/SOD2/FAM162A/VDAC2/GHITM/TIMM50	12	Protein
BP	GO:0006626	Protein targeting to mitochondrion	12/390	108/18805	2.48629e-06	7.276e-05	6.27034e-05	CSNK2A2/HSPA4/GRPEL1/AGK/AIFM1/HSPD1/PMPCA/HTRA2/PMPCB/TIMM50/MTX2/TIMM13	12	Protein
BP	GO:0034379	Very-low-density lipoprotein particle assembly	5/390	12/18805	2.6271e-06	7.62506e-05	6.57116e-05	APOC3/APOB/FECH/APOC1/DGAT1	5	Protein
BP	GO:0006006	Glucose metabolic process	16/390	193/18805	2.85905e-06	8.23082e-05	7.09319e-05	ACADM/DCXR/DLAT/SLC25A10/MDH2/PDHB/PDHA1/PDK1/PCK2/HK2/PC/HK1/SLC25A11/PCK1/PDK2/PDK4	16	Protein
BP	GO:0019674	Nad metabolic process	8/390	48/18805	5.81907e-06	0.000166172	0.000143205	NQO1/LDHB/MDH2/PCK2/SLC25A11/NADK2/GPD1L/GPD2	8	Protein
BP	GO:0006105	Succinate metabolic process	4/390	7/18805	6.06886e-06	0.000170554	0.000146981	SUCLA2/SUCLG2/ALDH5A1/SDHA	4	Protein
BP	GO:0006578	Amino-acid betaine biosynthetic process	4/390	7/18805	6.06886e-06	0.000170554	0.000146981	ACADM/TMLHE/ALDH7A1/SHMT1	4	Protein
BP	GO:0006116	Nadh oxidation	5/390	14/18805	6.41678e-06	0.000178912	0.000154183	NQO1/MDH2/PCK2/SLC25A11/GPD2	5	Protein
BP	GO:1902652	Secondary alcohol metabolic process	14/390	161/18805	6.8814e-06	0.000190368	0.000164056	CES1/MAPK1/ACAA2/ACO2/IDH3G/IDH3B/IDH3A/IDH2/ACADVL/APOB/FECH/APOC1/TM7SF2/ACADL	14	Protein
BP	GO:0006123	Mitochondrial electron transport, cytochrome c to oxygen	6/390	24/18805	7.51026e-06	0.000206154	0.00017766	COX7A2/CYCS/COX6C/COX4I1/MT-CO2/COX7A1	6	Protein
BP	GO:0042181	Ketone biosynthetic process	8/390	50/18805	7.9851e-06	0.000217502	0.00018744	AKR1C3/COQ8A/COQ3/COQ9/COQ6/SCP2/COQ5/COQ7	8	Protein
BP	GO:0005996	Monosaccharide metabolic process	18/390	260/18805	8.85443e-06	0.00023934	0.00020626	GMPPB/NUDT5/ACADM/DCXR/DLAT/SLC25A10/MDH2/PDHB/PDHA1/PDK1/PCK2/HK2/PC/HK1/SLC25A11/PCK1/PDK2/PDK4	18	Protein
BP	GO:0019318	Hexose metabolic process	17/390	237/18805	9.87835e-06	0.000264994	0.000228368	GMPPB/ACADM/DCXR/DLAT/SLC25A10/MDH2/PDHB/PDHA1/PDK1/PCK2/HK2/PC/HK1/SLC25A11/PCK1/PDK2/PDK4	17	Protein
BP	GO:1990544	Mitochondrial atp transmembrane transport	4/390	8/18805	1.19388e-05	0.000317858	0.000273925	SLC25A5/SLC25A4/SLC25A6/SLC25A24	4	Protein
BP	GO:1901570	Fatty acid derivative biosynthetic process	8/390	53/18805	1.24868e-05	0.000329967	0.000284361	GCDH/HMGCL/ACAT1/HSD17B12/ACSL1/FASN/ACACA/CBR4	8	Protein
BP	GO:0016226	Iron-sulfur cluster assembly	6/390	29/18805	2.42795e-05	0.00063216	0.000544785	GLRX3/NDUFAB1/HSPA9/NFU1/NUBPL/NFS1	6	Protein
BP	GO:0031163	Metallo-sulfur cluster assembly	6/390	29/18805	2.42795e-05	0.00063216	0.000544785	GLRX3/NDUFAB1/HSPA9/NFU1/NUBPL/NFS1	6	Protein
BP	GO:0065005	Protein-lipid complex assembly	6/390	30/18805	2.98221e-05	0.000770805	0.000664267	BIN1/APOC3/APOB/FECH/APOC1/DGAT1	6	Protein
BP	GO:0006575	Modified amino acid metabolic process	14/390	184/18805	3.12784e-05	0.000802585	0.000691656	GSTT1/GSTP1/ACADM/TMLHE/ALDH7A1/SOD2/CRAT/GSTZ1/CPT2/ACADL/SHMT2/SHMT1/CKB/MGST2	14	Protein
BP	GO:0006739	Nadp metabolic process	7/390	46/18805	4.16736e-05	0.00106163	0.000914893	NQO1/DCXR/PC/IDH2/ME2/NNT/NADK2	7	Protein
BP	GO:0051262	Protein tetramerization	10/390	100/18805	4.32101e-05	0.00109291	0.000941849	ACOT13/HSD17B10/SSBP1/SOD2/ACACA/HSD17B8/CBR4/SHMT2/FARSB/SHMT1	10	Protein
BP	GO:0042407	Cristae formation	5/390	20/18805	4.48418e-05	0.00112613	0.000970485	LETM1/APOO/AFG3L2/IMMT/CHCHD3	5	Protein
BP	GO:0034308	Primary alcohol metabolic process	10/390	103/18805	5.57376e-05	0.00138991	0.0011978	AKR1C3/SULT1A1/RDH5/ALDH1A1/PECR/ALDH1B1/ADH1B/ADH1C/CBR4/DGAT1	10	Protein
BP	GO:0051289	Protein homotetramerization	8/390	66/18805	6.4001e-05	0.00158481	0.00136576	ACOT13/HSD17B10/SSBP1/SOD2/ACACA/CBR4/SHMT2/SHMT1	8	Protein
BP	GO:0035795	Negative regulation of mitochondrial membrane permeability	5/390	22/18805	7.36061e-05	0.00180999	0.00155983	ACAA2/SLC25A5/SLC25A4/HK2/SLC25A6	5	Protein
BP	GO:0015866	Adp transport	4/390	12/18805	7.90318e-05	0.0019078	0.00164411	SLC25A5/SLC25A4/SLC25A6/SLC25A24	4	Protein
BP	GO:0033540	Fatty acid beta-oxidation using acyl-coa oxidase	4/390	12/18805	7.90318e-05	0.0019078	0.00164411	CRAT/EHHADH/SCP2/ACAA1	4	Protein
BP	GO:0008202	Steroid metabolic process	19/390	335/18805	7.91998e-05	0.0019078	0.00164411	AKR1C3/SULT1A1/CES1/MAPK1/RDH5/ACAA2/HSD17B10/HSD17B12/HINT2/ACADVL/APOB/FECH/APOC1/SCP2/BDH1/HSD17B8/TM7SF2/ACADL/ACAA1	19	Protein
BP	GO:0006121	Mitochondrial electron transport, succinate to ubiquinone	3/390	5/18805	8.58201e-05	0.00201251	0.00173435	SDHB/SDHA/SDHC	3	Protein
BP	GO:0019541	Propionate metabolic process	3/390	5/18805	8.58201e-05	0.00201251	0.00173435	PCK2/PCK1/MMUT	3	Protein
BP	GO:0045329	Carnitine biosynthetic process	3/390	5/18805	8.58201e-05	0.00201251	0.00173435	ACADM/TMLHE/SHMT1	3	Protein
BP	GO:0140021	Mitochondrial adp transmembrane transport	3/390	5/18805	8.58201e-05	0.00201251	0.00173435	SLC25A5/SLC25A4/SLC25A6	3	Protein
BP	GO:0043457	Regulation of cellular respiration	7/390	52/18805	9.36163e-05	0.00218089	0.00187946	SLC35A4/PPIF/COX7A2/UQCC2/CISD1/COX7A1/SHMT2	7	Protein
BP	GO:0001676	Long-chain fatty acid metabolic process	10/390	111/18805	0.000105176	0.00243418	0.00209774	AKR1C3/GSTP1/ACSF2/ACSL1/MGST3/SCP2/CPT2/ACOT1/ACADL/ACAA1	10	Protein
BP	GO:0034982	Mitochondrial protein processing	4/390	13/18805	0.000112292	0.00258199	0.00222512	PMPCA/PMPCB/AFG3L2/STOML2	4	Protein
BP	GO:0006851	Mitochondrial calcium ion transmembrane transport	5/390	24/18805	0.000114815	0.00262297	0.00226043	LETM1/HSPA9/PMPCB/AFG3L2/GHITM	5	Protein
BP	GO:1905709	Negative regulation of membrane permeability	5/390	25/18805	0.000141091	0.00320259	0.00275995	ACAA2/SLC25A5/SLC25A4/HK2/SLC25A6	5	Protein
BP	GO:1901289	Succinyl-coa catabolic process	3/390	6/18805	0.000168996	0.00381156	0.00328474	SUCLA2/SUCLG1/SUCLG2	3	Protein
BP	GO:0000423	Mitophagy	9/390	96/18805	0.000171168	0.00382453	0.00329592	CSNK2A2/SLC25A5/SLC25A4/NIPSNAP2/HK2/PHB2/HTRA2/NIPSNAP3A/NIPSNAP3B	9	Protein
BP	GO:0002082	Regulation of oxidative phosphorylation	5/390	26/18805	0.000171731	0.00382453	0.00329592	PPIF/COX7A2/UQCC2/COX7A1/SHMT2	5	Protein
BP	GO:0061077	Chaperone-mediated protein folding	8/390	76/18805	0.000175514	0.00388434	0.00334747	HSPB6/HSPB1/UNC45A/FKBP2/HSPE1/HSPA9/FKBP4/FKBP5	8	Protein
BP	GO:0072593	Reactive oxygen species metabolic process	15/390	245/18805	0.000194528	0.00427841	0.00368707	NQO1/HBG1/TXN/CRYAB/AKR1C3/ARF4/GSTP1/HP/DCXR/HK2/SOD2/NNT/NDUFS3/PDK4/COQ7	15	Protein
BP	GO:0034377	Plasma lipoprotein particle assembly	5/390	27/18805	0.0002072	0.00445168	0.00383639	APOC3/APOB/FECH/APOC1/DGAT1	5	Protein
BP	GO:0042026	Protein refolding	5/390	27/18805	0.0002072	0.00445168	0.00383639	CRYAB/HSPB6/HSPB1/HSPD1/HSPA9	5	Protein
BP	GO:0051791	Medium-chain fatty acid metabolic process	4/390	15/18805	0.000207435	0.00445168	0.00383639	CES1/ACADM/OXSM/CRAT	4	Protein
BP	GO:1901029	Negative regulation of mitochondrial outer membrane permeabilization involved in apoptotic signaling pathway	4/390	15/18805	0.000207435	0.00445168	0.00383639	ACAA2/SLC25A5/SLC25A4/SLC25A6	4	Protein
BP	GO:0046902	Regulation of mitochondrial membrane permeability	7/390	59/18805	0.000210817	0.00449701	0.00387545	ACAA2/SLC25A5/SLC25A4/HK2/SLC25A6/PPIF/VDAC2	7	Protein
BP	GO:0045454	Cell redox homeostasis	6/390	42/18805	0.000213607	0.00450229	0.00388	NQO1/TXN/GLRX3/TXNRD1/TXNRD2/NNT	6	Protein
BP	GO:1902686	Mitochondrial outer membrane permeabilization involved in programmed cell death	6/390	42/18805	0.000213607	0.00450229	0.00388	ACAA2/SLC25A5/SLC25A4/SLC25A6/PPIF/VDAC2	6	Protein
BP	GO:1990845	Adaptive thermogenesis	12/390	169/18805	0.000218628	0.00458083	0.00394769	ALDH1A1/DECR1/HADH/SLC25A5/SLC25A4/ACOT13/FH/ACSL1/CPT2/ACADL/HNRNPU/CKB	12	Protein
BP	GO:0043086	Negative regulation of catalytic activity	17/390	306/18805	0.000238079	0.00495905	0.00427363	CORO1C/MVP/GSTP1/BIN1/SERPINB1/HSPB1/UCHL1/SNX6/HP/TMLHE/WARS1/APOC3/NPM1/APOC1/RPL5/HNRNPU/SERPINH1	17	Protein
BP	GO:0000959	Mitochondrial rna metabolic process	7/390	61/18805	0.000260204	0.0053882	0.00464346	HSD17B10/C1QBP/MRPL12/TFAM/LRPPRC/DARS2/SARS2	7	Protein
BP	GO:0019432	Triglyceride biosynthetic process	6/390	44/18805	0.000277592	0.00568181	0.0048965	C3/PCK2/ACSL1/PCK1/GPAM/DGAT1	6	Protein
BP	GO:0035794	Positive regulation of mitochondrial membrane permeability	6/390	44/18805	0.000277592	0.00568181	0.0048965	ACAA2/SLC25A5/SLC25A4/SLC25A6/PPIF/VDAC2	6	Protein
BP	GO:1900024	Regulation of substrate adhesion-dependent cell spreading	7/390	62/18805	0.000288167	0.00586437	0.00505382	ACTN4/S100A10/CORO1C/ARPC2/MYADM/FGB/C1QBP	7	Protein
BP	GO:0010510	Regulation of acetyl-coa biosynthetic process from pyruvate	3/390	7/18805	0.000291191	0.00589144	0.00507715	PDK1/PDK2/PDK4	3	Protein
BP	GO:0006457	Protein folding	14/390	227/18805	0.000292825	0.00589144	0.00507715	CRYAB/HSPB6/HSPB1/HSPA4/UNC45A/FKBP2/GRPEL1/HSPE1/HSPD1/PPIF/HSPA9/MOGS/FKBP4/FKBP5	14	Protein
BP	GO:0140053	Mitochondrial gene expression	12/390	176/18805	0.000317786	0.00635751	0.00547881	HSD17B10/GFM1/C1QBP/MRPL12/UQCC2/TFAM/LRPPRC/TUFM/IARS2/DARS2/SARS2/SHMT2	12	Protein
BP	GO:0042398	Modified amino acid biosynthetic process	6/390	46/18805	0.000355729	0.00707661	0.00609851	ACADM/TMLHE/ALDH7A1/SHMT1/CKB/MGST2	6	Protein
BP	GO:0071384	Cellular response to corticosteroid stimulus	7/390	66/18805	0.000425119	0.00840975	0.00724739	AKR1C3/PCK2/AIFM1/ATP5F1A/PCK1/FECH/HNRNPU	7	Protein
BP	GO:0032543	Mitochondrial translation	10/390	132/18805	0.000433879	0.00853537	0.00735565	GFM1/C1QBP/MRPL12/UQCC2/LRPPRC/TUFM/IARS2/DARS2/SARS2/SHMT2	10	Protein
BP	GO:0006538	Glutamate catabolic process	3/390	8/18805	0.000458742	0.00892531	0.0076917	ADHFE1/GLUD1/GLUL	3	Protein
BP	GO:0050812	Regulation of acyl-coa biosynthetic process	3/390	8/18805	0.000458742	0.00892531	0.0076917	PDK1/PDK2/PDK4	3	Protein
BP	GO:0006641	Triglyceride metabolic process	9/390	110/18805	0.00047566	0.00920389	0.00793177	C3/PCK2/ACSL1/APOC3/APOB/PCK1/APOC1/GPAM/DGAT1	9	Protein
BP	GO:1905710	Positive regulation of membrane permeability	6/390	49/18805	0.000504051	0.00970024	0.00835952	ACAA2/SLC25A5/SLC25A4/SLC25A6/PPIF/VDAC2	6	Protein
BP	GO:0006094	Gluconeogenesis	8/390	89/18805	0.000520627	0.00996508	0.00858775	ACADM/SLC25A10/MDH2/PCK2/PC/SLC25A11/PCK1/PDK2	8	Protein
BP	GO:0097345	Mitochondrial outer membrane permeabilization	5/390	33/18805	0.000550034	0.0104445	0.00900095	ACAA2/SLC25A5/SLC25A4/SLC25A6/VDAC2	5	Protein
BP	GO:0006071	Glycerol metabolic process	4/390	19/18805	0.000551576	0.0104445	0.00900095	COQ3/PCK2/PCK1/GPD2	4	Protein
BP	GO:2001234	Negative regulation of apoptotic signaling pathway	14/390	243/18805	0.000580055	0.0109254	0.00941533	GSTP1/HSPB1/MIF/CSNK2A2/FGB/ACAA2/SLC25A5/SLC25A4/SLC25A6/PPIF/SOD2/HTRA2/VDAC2/GHITM	14	Protein
BP	GO:0006536	Glutamate metabolic process	5/390	34/18805	0.000634009	0.0117541	0.0101295	ADHFE1/GLUD1/ALDH5A1/DGLUCY/GLUL	5	Protein
BP	GO:0009112	Nucleobase metabolic process	5/390	34/18805	0.000634009	0.0117541	0.0101295	MAPK1/ADK/ALDH6A1/DHODH/SHMT1	5	Protein
BP	GO:0090151	Establishment of protein localization to mitochondrial membrane	5/390	34/18805	0.000634009	0.0117541	0.0101295	HSPA4/AGK/TMEM126A/MTX2/TIMM13	5	Protein
BP	GO:0019319	Hexose biosynthetic process	8/390	92/18805	0.000650276	0.0119929	0.0103353	ACADM/SLC25A10/MDH2/PCK2/PC/SLC25A11/PCK1/PDK2	8	Protein
BP	GO:0006108	Malate metabolic process	3/390	9/18805	0.000677545	0.0123669	0.0106576	MDH2/FH/ME2	3	Protein
BP	GO:0009157	Deoxyribonucleoside monophosphate biosynthetic process	3/390	9/18805	0.000677545	0.0123669	0.0106576	ADK/DUT/SHMT1	3	Protein
BP	GO:0051259	Protein complex oligomerization	15/390	276/18805	0.000685068	0.0124401	0.0107207	MIF/LETM1/ACOT13/HSD17B10/SSBP1/SOD2/ACACA/HSD17B8/CLYBL/CBR4/SHMT2/STOML2/FARSB/SHMT1/RBMX	15	Protein
BP	GO:0042572	Retinol metabolic process	6/390	52/18805	0.000696535	0.0125838	0.0108446	AKR1C3/RDH5/ALDH1A1/ADH1B/ADH1C/DGAT1	6	Protein
BP	GO:0000422	Autophagy of mitochondrion	9/390	116/18805	0.000700666	0.0125942	0.0108535	CSNK2A2/SLC25A5/SLC25A4/NIPSNAP2/HK2/PHB2/HTRA2/NIPSNAP3A/NIPSNAP3B	9	Protein
BP	GO:1903715	Regulation of aerobic respiration	5/390	35/18805	0.000727228	0.0130056	0.0112081	PPIF/COX7A2/UQCC2/COX7A1/SHMT2	5	Protein
BP	GO:0010821	Regulation of mitochondrion organization	9/390	117/18805	0.000745464	0.0132648	0.0114314	ACAA2/SLC25A5/SLC25A4/SLC25A6/SSBP1/PPIF/FAM162A/TFRC/GHITM	9	Protein
BP	GO:0046364	Monosaccharide biosynthetic process	8/390	94/18805	0.000750323	0.0132845	0.0114484	ACADM/SLC25A10/MDH2/PCK2/PC/SLC25A11/PCK1/PDK2	8	Protein
BP	GO:0046460	Neutral lipid biosynthetic process	6/390	53/18805	0.000771928	0.013465	0.0116039	C3/PCK2/ACSL1/PCK1/GPAM/DGAT1	6	Protein
BP	GO:0046463	Acylglycerol biosynthetic process	6/390	53/18805	0.000771928	0.013465	0.0116039	C3/PCK2/ACSL1/PCK1/GPAM/DGAT1	6	Protein
BP	GO:0170038	Proteinogenic amino acid biosynthetic process	6/390	53/18805	0.000771928	0.013465	0.0116039	PSAT1/BCAT2/GLUD1/GLUL/SHMT2/SHMT1	6	Protein
BP	GO:0008652	Amino acid biosynthetic process	7/390	73/18805	0.000785869	0.013641	0.0117556	PSAT1/ALDH1A1/BCAT2/GLUD1/GLUL/SHMT2/SHMT1	7	Protein
BP	GO:0072527	Pyrimidine-containing compound metabolic process	7/390	75/18805	0.000924108	0.0158848	0.0136893	MAPK1/NME1/ALDH6A1/DHODH/DUT/AK3/SHMT1	7	Protein
BP	GO:0090559	Regulation of membrane permeability	7/390	75/18805	0.000924108	0.0158848	0.0136893	ACAA2/SLC25A5/SLC25A4/HK2/SLC25A6/PPIF/VDAC2	7	Protein
BP	GO:0046890	Regulation of lipid biosynthetic process	12/390	199/18805	0.000950038	0.0161475	0.0139156	AKR1C3/CES1/MAPK1/C3/ACADVL/APOC3/APOB/PCK1/APOC1/SCP2/ACADL/PDK4	12	Protein
BP	GO:0035694	Mitochondrial protein catabolic process	3/390	10/18805	0.00095307	0.0161475	0.0139156	CLPP/HTRA2/LONP1	3	Protein
BP	GO:1902224	Ketone body metabolic process	3/390	10/18805	0.00095307	0.0161475	0.0139156	HMGCL/ACAT1/OXCT1	3	Protein
BP	GO:0019400	Alditol metabolic process	4/390	22/18805	0.000991043	0.0167109	0.0144012	COQ3/PCK2/PCK1/GPD2	4	Protein
BP	GO:0006081	Aldehyde metabolic process	7/390	76/18805	0.00100005	0.0167829	0.0144632	AKR1C3/PNPO/ALDH1A1/SLC25A10/IDH2/ALDH7A1/PCK1	7	Protein
BP	GO:0042542	Response to hydrogen peroxide	8/390	99/18805	0.00105531	0.0176266	0.0151903	NQO1/TXN/CRYAB/HP/AIFM1/PPIF/SOD2/MT-ND5	8	Protein
BP	GO:0044743	Protein transmembrane import into intracellular organelle	5/390	38/18805	0.00106867	0.017766	0.0153104	USP9X/GRPEL1/AIFM1/HSPD1/TIMM50	5	Protein
BP	GO:0006721	Terpenoid metabolic process	8/390	100/18805	0.00112676	0.0186443	0.0160673	AKR1C3/RDH5/ALDH1A1/PECR/HTRA2/ADH1B/ADH1C/DGAT1	8	Protein
BP	GO:0071825	Protein-lipid complex organization	6/390	57/18805	0.00113834	0.0187481	0.0161568	BIN1/APOC3/APOB/FECH/APOC1/DGAT1	6	Protein
BP	GO:0006107	Oxaloacetate metabolic process	3/390	11/18805	0.00129038	0.0208642	0.0179804	PCK2/FAHD2A/PCK1	3	Protein
BP	GO:0009188	Ribonucleoside diphosphate biosynthetic process	3/390	11/18805	0.00129038	0.0208642	0.0179804	AK2/DHODH/AK3	3	Protein
BP	GO:0044571	[2fe-2s] cluster assembly	3/390	11/18805	0.00129038	0.0208642	0.0179804	GLRX3/NDUFAB1/NFS1	3	Protein
BP	GO:2000169	Regulation of peptidyl-cysteine s-nitrosylation	3/390	11/18805	0.00129038	0.0208642	0.0179804	TXN/TBC1D24/DMD	3	Protein
BP	GO:1902110	Positive regulation of mitochondrial membrane permeability involved in apoptotic process	5/390	40/18805	0.00135429	0.0217979	0.0187851	ACAA2/SLC25A5/SLC25A4/SLC25A6/VDAC2	5	Protein
BP	GO:0070482	Response to oxygen levels	17/390	358/18805	0.0013856	0.0221241	0.0190662	CRYAB/COMT/ACAA2/PDK1/HK2/AIFM1/PHB2/TXNRD2/SOD2/TFAM/FAM162A/LONP1/MT-ND5/MT-CO2/TFRC/NDUFS2/MT-ND4	17	Protein
BP	GO:0015867	Atp transport	4/390	24/18805	0.0013933	0.0221241	0.0190662	SLC25A5/SLC25A4/SLC25A6/SLC25A24	4	Protein
BP	GO:1901028	Regulation of mitochondrial outer membrane permeabilization involved in apoptotic signaling pathway	4/390	24/18805	0.0013933	0.0221241	0.0190662	ACAA2/SLC25A5/SLC25A4/SLC25A6	4	Protein
BP	GO:0051260	Protein homooligomerization	12/390	210/18805	0.00150705	0.0238235	0.0205307	MIF/LETM1/ACOT13/HSD17B10/SSBP1/SOD2/ACACA/CLYBL/CBR4/SHMT2/SHMT1/RBMX	12	Protein
BP	GO:0006418	Trna aminoacylation for protein translation	5/390	41/18805	0.00151651	0.0238665	0.0205678	WARS1/IARS2/DARS2/SARS2/FARSB	5	Protein
BP	GO:0071383	Cellular response to steroid hormone stimulus	12/390	211/18805	0.00156883	0.0244912	0.0211062	PLPP1/AKR1C3/MAPK1/PCK2/AIFM1/PHB1/PHB2/ATP5F1A/PCK1/FECH/HNRNPU/FKBP4	12	Protein
BP	GO:2000377	Regulation of reactive oxygen species metabolic process	10/390	156/18805	0.00157413	0.0244912	0.0211062	CRYAB/AKR1C3/ARF4/GSTP1/HP/DCXR/HK2/SOD2/NNT/COQ7	10	Protein
BP	GO:0042445	Hormone metabolic process	13/390	240/18805	0.00157696	0.0244912	0.0211062	AKR1C3/SULT1A1/RDH5/ALDH1A1/MME/HSD17B10/HSD17B12/ADH1B/ADH1C/SCP2/HSD17B8/CTSZ/DGAT1	13	Protein
BP	GO:1900026	Positive regulation of substrate adhesion-dependent cell spreading	5/390	43/18805	0.00188319	0.0291195	0.0250947	S100A10/ARPC2/MYADM/FGB/C1QBP	5	Protein
BP	GO:0045717	Negative regulation of fatty acid biosynthetic process	4/390	26/18805	0.00189728	0.0292099	0.0251727	ACADVL/APOC3/APOC1/ACADL	4	Protein
BP	GO:1901607	Alpha-amino acid biosynthetic process	6/390	64/18805	0.00208342	0.0318848	0.0274778	PSAT1/BCAT2/GLUD1/GLUL/SHMT2/SHMT1	6	Protein
BP	GO:0043039	Trna aminoacylation	5/390	44/18805	0.00208903	0.0318848	0.0274778	WARS1/IARS2/DARS2/SARS2/FARSB	5	Protein
BP	GO:0006544	Glycine metabolic process	3/390	13/18805	0.00216873	0.0323566	0.0278844	GCSH/SHMT2/SHMT1	3	Protein
BP	GO:0006563	L-serine metabolic process	3/390	13/18805	0.00216873	0.0323566	0.0278844	PSAT1/SHMT2/SHMT1	3	Protein
BP	GO:0017062	Respiratory chain complex iii assembly	3/390	13/18805	0.00216873	0.0323566	0.0278844	UQCRFS1/UQCC2/UQCC1	3	Protein
BP	GO:0034551	Mitochondrial respiratory chain complex iii assembly	3/390	13/18805	0.00216873	0.0323566	0.0278844	UQCRFS1/UQCC2/UQCC1	3	Protein
BP	GO:0031639	Plasminogen activation	4/390	27/18805	0.00219121	0.0323566	0.0278844	S100A10/ANXA2/FGB/CTSZ	4	Protein
BP	GO:0070129	Regulation of mitochondrial translation	4/390	27/18805	0.00219121	0.0323566	0.0278844	C1QBP/UQCC2/LRPPRC/SHMT2	4	Protein
BP	GO:1901679	Nucleotide transmembrane transport	4/390	27/18805	0.00219121	0.0323566	0.0278844	SLC25A5/SLC25A4/SLC25A6/SLC25A24	4	Protein
BP	GO:1901655	Cellular response to ketone	8/390	111/18805	0.00219721	0.0323566	0.0278844	AKR1C3/GNG2/PCK2/AIFM1/ATP5F1A/PCK1/FECH/ACACA	8	Protein
BP	GO:0005977	Glycogen metabolic process	7/390	87/18805	0.00220218	0.0323566	0.0278844	GYG1/UGP2/PYGL/COMT/ACADM/PYGM/GYS1	7	Protein
BP	GO:0006639	Acylglycerol metabolic process	9/390	137/18805	0.00225477	0.0329923	0.0284323	C3/PCK2/ACSL1/APOC3/APOB/PCK1/APOC1/GPAM/DGAT1	9	Protein
BP	GO:0019216	Regulation of lipid metabolic process	16/390	343/18805	0.00226776	0.0330458	0.0284784	PLPP1/AKR1C3/CES1/MAPK1/C3/PDK1/PHB2/ACADVL/APOC3/APOB/PCK1/APOC1/SCP2/PDK2/ACADL/PDK4	16	Protein
BP	GO:0043038	Amino acid activation	5/390	45/18805	0.00231082	0.0335353	0.0289002	WARS1/IARS2/DARS2/SARS2/FARSB	5	Protein
BP	GO:0006638	Neutral lipid metabolic process	9/390	138/18805	0.00236909	0.0342406	0.029508	C3/PCK2/ACSL1/APOC3/APOB/PCK1/APOC1/GPAM/DGAT1	9	Protein
BP	GO:0120254	Olefinic compound metabolic process	10/390	165/18805	0.00238147	0.0342796	0.0295417	AKR1C3/GSTP1/RDH5/ALDH1A1/ADH1B/ADH1C/MGST3/SCP2/ACAA1/DGAT1	10	Protein
BP	GO:1905954	Positive regulation of lipid localization	8/390	113/18805	0.00245743	0.0352299	0.0303605	CES1/MIF/C3/ANXA2/ACSL1/APOB/SCP2/ABCA8	8	Protein
BP	GO:0016101	Diterpenoid metabolic process	7/390	89/18805	0.00250704	0.0355388	0.0306268	AKR1C3/RDH5/ALDH1A1/PECR/ADH1B/ADH1C/DGAT1	7	Protein
BP	GO:0044042	Glucan metabolic process	7/390	89/18805	0.00250704	0.0355388	0.0306268	GYG1/UGP2/PYGL/COMT/ACADM/PYGM/GYS1	7	Protein
BP	GO:0006515	Protein quality control for misfolded or incompletely synthesized proteins	4/390	28/18805	0.00251508	0.0355388	0.0306268	CLPP/AFG3L2/LONP1/TMEM126A	4	Protein
BP	GO:0062012	Regulation of small molecule metabolic process	16/390	347/18805	0.00254468	0.0355388	0.0306268	AKR1C3/CES1/MAPK1/UCHL1/ACADM/PDK1/FH/ACADVL/APOC3/APOB/APOC1/ME2/CLYBL/PDK2/ACADL/PDK4	16	Protein
BP	GO:0021762	Substantia nigra development	5/390	46/18805	0.00254924	0.0355388	0.0306268	NDRG2/GLUD1/NDUFS3/ATP5PB/CKB	5	Protein
BP	GO:0031638	Zymogen activation	5/390	46/18805	0.00254924	0.0355388	0.0306268	S100A10/ANXA2/FGB/HP/CTSZ	5	Protein
BP	GO:1901524	Regulation of mitophagy	5/390	46/18805	0.00254924	0.0355388	0.0306268	CSNK2A2/SLC25A5/SLC25A4/HK2/HTRA2	5	Protein
BP	GO:0051348	Negative regulation of transferase activity	10/390	167/18805	0.0025996	0.0360538	0.0310706	CORO1C/MVP/GSTP1/HSPB1/UCHL1/SNX6/WARS1/NPM1/RPL5/HNRNPU	10	Protein
BP	GO:0001666	Response to hypoxia	15/390	316/18805	0.00260654	0.0360538	0.0310706	CRYAB/COMT/ACAA2/PDK1/HK2/AIFM1/PHB2/SOD2/TFAM/FAM162A/LONP1/MT-ND5/MT-CO2/TFRC/MT-ND4	15	Protein
BP	GO:0009133	Nucleoside diphosphate biosynthetic process	3/390	14/18805	0.00271803	0.0374496	0.0322735	AK2/DHODH/AK3	3	Protein
BP	GO:0044273	Sulfur compound catabolic process	5/390	47/18805	0.00280502	0.0384983	0.0331772	SUCLA2/SUCLG1/TST/ACAT1/SUCLG2	5	Protein
BP	GO:0006694	Steroid biosynthetic process	10/390	169/18805	0.00283345	0.0387384	0.0333842	AKR1C3/CES1/MAPK1/ACAA2/HSD17B12/HINT2/APOB/SCP2/HSD17B8/TM7SF2	10	Protein
BP	GO:0010565	Regulation of ketone metabolic process	9/390	142/18805	0.00287324	0.0390301	0.0336355	AKR1C3/CES1/PDK1/ACADVL/APOC3/APOC1/PDK2/ACADL/PDK4	9	Protein
BP	GO:0016485	Protein processing	12/390	227/18805	0.00287683	0.0390301	0.0336355	S100A10/ANXA2/FGB/HP/MME/PMPCA/HTRA2/PMPCB/AFG3L2/CPM/CTSZ/STOML2	12	Protein
BP	GO:0043467	Regulation of generation of precursor metabolites and energy	9/390	143/18805	0.00301164	0.0407032	0.0350774	UCHL1/SLC35A4/PPIF/COX7A2/UQCC2/CISD1/COX7A1/SHMT2/GHITM	9	Protein
BP	GO:1902108	Regulation of mitochondrial membrane permeability involved in apoptotic process	5/390	48/18805	0.00307884	0.0414532	0.0357237	ACAA2/SLC25A5/SLC25A4/SLC25A6/VDAC2	5	Protein
BP	GO:0033673	Negative regulation of kinase activity	9/390	144/18805	0.00315525	0.042321	0.0364716	CORO1C/MVP/GSTP1/HSPB1/UCHL1/SNX6/WARS1/NPM1/HNRNPU	9	Protein
BP	GO:0071549	Cellular response to dexamethasone stimulus	4/390	30/18805	0.00325849	0.0434282	0.0374258	PCK2/ATP5F1A/PCK1/FECH	4	Protein
BP	GO:0000302	Response to reactive oxygen species	11/390	201/18805	0.00326233	0.0434282	0.0374258	NQO1/TXN/CRYAB/GSTP1/HP/AIFM1/PPIF/TXNRD2/SOD2/PDK2/MT-ND5	11	Protein
BP	GO:0009263	Deoxyribonucleotide biosynthetic process	3/390	15/18805	0.00334568	0.0435553	0.0375353	ADK/DUT/SHMT1	3	Protein
BP	GO:0009265	2'-deoxyribonucleotide biosynthetic process	3/390	15/18805	0.00334568	0.0435553	0.0375353	ADK/DUT/SHMT1	3	Protein
BP	GO:0017014	Protein nitrosylation	3/390	15/18805	0.00334568	0.0435553	0.0375353	TXN/TBC1D24/DMD	3	Protein
BP	GO:0018119	Peptidyl-cysteine s-nitrosylation	3/390	15/18805	0.00334568	0.0435553	0.0375353	TXN/TBC1D24/DMD	3	Protein
BP	GO:0021859	Pyramidal neuron differentiation	3/390	15/18805	0.00334568	0.0435553	0.0375353	TUBA1A/UQCRQ/OGDH	3	Protein
BP	GO:0046385	Deoxyribose phosphate biosynthetic process	3/390	15/18805	0.00334568	0.0435553	0.0375353	ADK/DUT/SHMT1	3	Protein
BP	GO:0090181	Regulation of cholesterol metabolic process	5/390	49/18805	0.00337143	0.0437298	0.0376857	CES1/MAPK1/ACADVL/APOB/ACADL	5	Protein
BP	GO:0008064	Regulation of actin polymerization or depolymerization	9/390	146/18805	0.00345863	0.0446971	0.0385193	COTL1/DSTN/BIN1/ARPC2/SCIN/CFL2/SPTAN1/MYADM/TWF2	9	Protein
BP	GO:0170034	L-amino acid biosynthetic process	5/390	50/18805	0.00368349	0.04743	0.0408744	PSAT1/BCAT2/GLUD1/GLUL/SHMT2	5	Protein
BP	GO:0036293	Response to decreased oxygen levels	15/390	330/18805	0.00390889	0.048709	0.0419766	CRYAB/COMT/ACAA2/PDK1/HK2/AIFM1/PHB2/SOD2/TFAM/FAM162A/LONP1/MT-ND5/MT-CO2/TFRC/MT-ND4	15	Protein
BP	GO:0006720	Isoprenoid metabolic process	8/390	122/18805	0.00394049	0.048709	0.0419766	AKR1C3/RDH5/ALDH1A1/PECR/HTRA2/ADH1B/ADH1C/DGAT1	8	Protein
BP	GO:0030832	Regulation of actin filament length	9/390	149/18805	0.00395617	0.048709	0.0419766	COTL1/DSTN/BIN1/ARPC2/SCIN/CFL2/SPTAN1/MYADM/TWF2	9	Protein
BP	GO:0006692	Prostanoid metabolic process	5/390	51/18805	0.00401572	0.048709	0.0419766	AKR1C3/GSTP1/MIF/COMT/MGST3	5	Protein
BP	GO:0032365	Intracellular lipid transport	5/390	51/18805	0.00401572	0.048709	0.0419766	CES1/ANXA2/SCP2/CPT2/SLC25A20	5	Protein
BP	GO:0170036	Import into the mitochondrion	5/390	51/18805	0.00401572	0.048709	0.0419766	GRPEL1/TST/HSPA9/AFG3L2/TIMM50	5	Protein
BP	GO:1903146	Regulation of autophagy of mitochondrion	5/390	51/18805	0.00401572	0.048709	0.0419766	CSNK2A2/SLC25A5/SLC25A4/HK2/HTRA2	5	Protein
BP	GO:0032272	Negative regulation of protein polymerization	6/390	73/18805	0.00404993	0.048709	0.0419766	SCIN/SPTAN1/MYADM/VDAC2/TWF2/FKBP4	6	Protein
BP	GO:0071806	Protein transmembrane transport	6/390	73/18805	0.00404993	0.048709	0.0419766	USP9X/GRPEL1/AIFM1/HSPD1/SEC61A1/TIMM50	6	Protein
BP	GO:0006206	Pyrimidine nucleobase metabolic process	3/390	16/18805	0.00405497	0.048709	0.0419766	MAPK1/ALDH6A1/DHODH	3	Protein
BP	GO:0009130	Pyrimidine nucleoside monophosphate biosynthetic process	3/390	16/18805	0.00405497	0.048709	0.0419766	DHODH/DUT/SHMT1	3	Protein
BP	GO:0051290	Protein heterotetramerization	3/390	16/18805	0.00405497	0.048709	0.0419766	HSD17B8/CBR4/FARSB	3	Protein
BP	GO:0016051	Carbohydrate biosynthetic process	11/390	207/18805	0.00407539	0.048709	0.0419766	GYG1/UGP2/ACADM/SLC25A10/MDH2/PCK2/PC/SLC25A11/PCK1/GYS1/PDK2	11	Protein
BP	GO:0006101	Citrate metabolic process	2/390	5/18805	0.00411599	0.048709	0.0419766	CS/ACO2	2	Protein
BP	GO:0006114	Glycerol biosynthetic process	2/390	5/18805	0.00411599	0.048709	0.0419766	PCK2/PCK1	2	Protein
BP	GO:0006172	Adp biosynthetic process	2/390	5/18805	0.00411599	0.048709	0.0419766	AK2/AK3	2	Protein
BP	GO:0006545	Glycine biosynthetic process	2/390	5/18805	0.00411599	0.048709	0.0419766	SHMT2/SHMT1	2	Protein
BP	GO:0010915	Regulation of very-low-density lipoprotein particle clearance	2/390	5/18805	0.00411599	0.048709	0.0419766	APOC3/APOC1	2	Protein
BP	GO:0019401	Alditol biosynthetic process	2/390	5/18805	0.00411599	0.048709	0.0419766	PCK2/PCK1	2	Protein
BP	GO:0032379	Positive regulation of intracellular lipid transport	2/390	5/18805	0.00411599	0.048709	0.0419766	ANXA2/SCP2	2	Protein
BP	GO:0051410	Detoxification of nitrogen compound	2/390	5/18805	0.00411599	0.048709	0.0419766	MTARC1/MTARC2	2	Protein
BP	GO:0070458	Cellular detoxification of nitrogen compound	2/390	5/18805	0.00411599	0.048709	0.0419766	MTARC1/MTARC2	2	Protein
BP	GO:0072656	Maintenance of protein location in mitochondrion	2/390	5/18805	0.00411599	0.048709	0.0419766	HK2/HK1	2	Protein
BP	GO:0008203	Cholesterol metabolic process	9/390	150/18805	0.00413391	0.048709	0.0419766	CES1/MAPK1/ACAA2/ACADVL/APOB/FECH/APOC1/TM7SF2/ACADL	9	Protein
BP	GO:0009069	Serine family amino acid metabolic process	4/390	32/18805	0.0041389	0.048709	0.0419766	PSAT1/GCSH/SHMT2/SHMT1	4	Protein
BP	GO:0030301	Cholesterol transport	8/390	123/18805	0.00414047	0.048709	0.0419766	CES1/COMT/ANXA2/APOC3/APOB/APOC1/SCP2/ABCA8	8	Protein
BP	GO:0072594	Establishment of protein localization to organelle	19/390	467/18805	0.00424513	0.0497748	0.0428952	USP9X/CSNK2A2/HSPA4/GRPEL1/AGK/HK2/AIFM1/PHB2/HSPD1/PMPCA/HK1/HTRA2/NPM1/PMPCB/TMEM126A/SEC61A1/TIMM50/MTX2/TIMM13	19	Protein
CC	GO:1990204	Oxidoreductase complex	54/395	153/19880	5.23192e-53	2.13462e-50	1.69073e-50	LDHB/BCKDHA/GCSH/UQCRH/PDHX/HADHA/DLAT/PDHB/PDHA1/PDK1/BCKDHB/IDH3G/UQCRQ/IDH3B/DLST/HADHB/IDH3A/DBT/NDUFV2/NDUFAB1/UQCR10/COX7A2/NDUFA11/DLD/UQCRFS1/UQCRB/UQCRC1/MTARC1/OGDH/NDUFS8/COX6C/UQCRC2/NDUFB10/SDHB/HSD17B8/NDUFS3/CYC1/PDK2/COX4I1/NDUFA8/SDHA/SDHC/NDUFV1/CBR4/MT-ND5/MT-CO2/COX7A1/NDUFA10/NDUFS2/MT-ND4/NDUFB9/NDUFA5/NDUFB4/NDUFB3	54	Protein
CC	GO:0098803	Respiratory chain complex	44/395	109/19880	2.42857e-46	4.95429e-44	3.92406e-44	UQCRH/UQCRQ/ATP5MG/ATP5MJ/NDUFV2/ATP5MK/NDUFAB1/UQCR10/COX7A2/NDUFA11/UQCRFS1/UQCRB/UQCRC1/ATP5F1D/ATP5F1A/ATP5F1B/NDUFS8/COX6C/ATP5ME/NNT/UQCRC2/NDUFB10/SDHB/NDUFS3/CYC1/COX4I1/NDUFA8/SDHA/ATP5PO/SDHC/NDUFV1/ATP5F1C/MT-ND5/MT-CO2/MT-ATP8/ATP5PB/COX7A1/NDUFA10/NDUFS2/MT-ND4/NDUFB9/NDUFA5/NDUFB4/NDUFB3	44	Protein
CC	GO:0045239	Tricarboxylic acid cycle heteromeric enzyme complex	12/395	17/19880	1.81509e-17	2.46852e-15	1.9552e-15	BCKDHA/SUCLA2/SUCLG1/SUCLG2/BCKDHB/IDH3G/IDH3B/DLST/IDH3A/DBT/DLD/OGDH	12	Protein
CC	GO:0009295	Nucleoid	17/395	49/19880	3.02859e-17	2.47133e-15	1.95743e-15	HADHA/SLC25A5/HSD17B10/HADHB/SSBP1/DBT/HSPA9/ACADVL/SOD2/UQCC2/TFAM/ATP5F1B/LRPPRC/LONP1/TUFM/VDAC2/SHMT2	17	Protein
CC	GO:0042645	Mitochondrial nucleoid	17/395	49/19880	3.02859e-17	2.47133e-15	1.95743e-15	HADHA/SLC25A5/HSD17B10/HADHB/SSBP1/DBT/HSPA9/ACADVL/SOD2/UQCC2/TFAM/ATP5F1B/LRPPRC/LONP1/TUFM/VDAC2/SHMT2	17	Protein
CC	GO:0045240	Alpha-ketoacid dehydrogenase complex	12/395	19/19880	1.42589e-16	9.69602e-15	7.67977e-15	BCKDHA/PDHX/DLAT/PDHB/PDHA1/PDK1/BCKDHB/DLST/DBT/DLD/OGDH/PDK2	12	Protein
CC	GO:0030964	Nadh dehydrogenase complex	16/395	46/19880	2.51232e-16	1.28128e-14	1.01484e-14	NDUFV2/NDUFAB1/NDUFA11/NDUFS8/NDUFB10/NDUFS3/NDUFA8/NDUFV1/MT-ND5/NDUFA10/NDUFS2/MT-ND4/NDUFB9/NDUFA5/NDUFB4/NDUFB3	16	Protein
CC	GO:0045271	Respiratory chain complex i	16/395	46/19880	2.51232e-16	1.28128e-14	1.01484e-14	NDUFV2/NDUFAB1/NDUFA11/NDUFS8/NDUFB10/NDUFS3/NDUFA8/NDUFV1/MT-ND5/NDUFA10/NDUFS2/MT-ND4/NDUFB9/NDUFA5/NDUFB4/NDUFB3	16	Protein
CC	GO:0045259	Proton-transporting atp synthase complex	11/395	17/19880	1.84581e-15	8.36768e-14	6.62765e-14	ATP5MG/ATP5MJ/ATP5MK/ATP5F1D/ATP5F1A/ATP5F1B/ATP5ME/ATP5PO/ATP5F1C/MT-ATP8/ATP5PB	11	Protein
CC	GO:0098798	Mitochondrial protein-containing complex	25/395	178/19880	1.67023e-14	6.81455e-13	5.39749e-13	GRPEL1/HADHA/SLC25A5/SLC25A4/AGK/PHB1/HSD17B10/SLC25A6/HADHB/PHB2/PMPCA/NDUFAB1/APOO/PPIF/HSPA9/MRPL12/PMPCB/MPC2/AFG3L2/IMMT/CHCHD3/TIMM50/NFS1/MTX2/TIMM13	25	Protein
CC	GO:1902495	Transmembrane transporter complex	40/395	498/19880	6.34047e-14	2.35174e-12	1.8627e-12	UQCRH/UQCRQ/ATP5MG/ATP5MJ/NDUFV2/ATP5MK/NDUFAB1/UQCR10/COX7A2/NDUFA11/UQCRFS1/UQCRB/UQCRC1/ATP5F1D/ATP5F1A/ATP5F1B/NDUFS8/COX6C/ATP5ME/UQCRC2/NDUFB10/NDUFS3/CYC1/COX4I1/NDUFA8/ATP5PO/NDUFV1/ATP5F1C/MT-ND5/MT-CO2/MT-ATP8/ATP5PB/COX7A1/NDUFA10/NDUFS2/MT-ND4/NDUFB9/NDUFA5/NDUFB4/NDUFB3	40	Protein
CC	GO:0070069	Cytochrome complex	13/395	41/19880	6.58341e-13	2.23836e-11	1.7729e-11	UQCRH/UQCRQ/UQCR10/COX7A2/UQCRFS1/UQCRB/UQCRC1/COX6C/UQCRC2/CYC1/COX4I1/MT-CO2/COX7A1	13	Protein
CC	GO:0045254	Pyruvate dehydrogenase complex	7/395	8/19880	9.1225e-12	2.86306e-10	2.2677e-10	PDHX/DLAT/PDHB/PDHA1/PDK1/DLD/PDK2	7	Protein
CC	GO:0098800	Inner mitochondrial membrane protein complex	13/395	51/19880	1.48653e-11	4.33217e-10	3.43131e-10	GRPEL1/AGK/PHB1/SLC25A6/PHB2/APOO/HSPA9/MPC2/AFG3L2/IMMT/CHCHD3/TIMM50/MTX2	13	Protein
CC	GO:0045275	Respiratory chain complex iii	8/395	13/19880	2.67146e-11	7.26636e-10	5.75535e-10	UQCRH/UQCRQ/UQCR10/UQCRFS1/UQCRB/UQCRC1/UQCRC2/CYC1	8	Protein
CC	GO:0005741	Mitochondrial outer membrane	22/395	228/19880	1.12716e-09	2.84612e-08	2.25428e-08	AGK/NIPSNAP2/HK2/HADHB/PHB2/HK1/HINT2/BPHL/APOO/HSPA9/ACSL1/MTARC1/MGST3/MTARC2/IMMT/CHCHD3/TUFM/CYB5A/GPAM/VDAC2/CISD1/MTX2	22	Protein
CC	GO:0016469	Proton-transporting two-sector atpase complex	11/395	46/19880	1.18588e-09	2.84612e-08	2.25428e-08	ATP5MG/ATP5MJ/ATP5MK/ATP5F1D/ATP5F1A/ATP5F1B/ATP5ME/ATP5PO/ATP5F1C/MT-ATP8/ATP5PB	11	Protein
CC	GO:0031968	Organelle outer membrane	23/395	257/19880	2.04974e-09	4.64608e-08	3.67994e-08	AGK/NIPSNAP2/HK2/HADHB/PHB2/HK1/HINT2/BPHL/APOO/HSPA9/ACSL1/MTARC1/MGST3/MTARC2/LRPPRC/IMMT/CHCHD3/TUFM/CYB5A/GPAM/VDAC2/CISD1/MTX2	23	Protein
CC	GO:0019867	Outer membrane	23/395	259/19880	2.38158e-09	5.11413e-08	4.05067e-08	AGK/NIPSNAP2/HK2/HADHB/PHB2/HK1/HINT2/BPHL/APOO/HSPA9/ACSL1/MTARC1/MGST3/MTARC2/LRPPRC/IMMT/CHCHD3/TUFM/CYB5A/GPAM/VDAC2/CISD1/MTX2	23	Protein
CC	GO:0031970	Organelle envelope lumen	14/395	97/19880	7.44599e-09	1.51898e-07	1.20311e-07	TUBB/AGK/AIFM1/SUOX/AK2/HTRA2/UQCC2/CYCS/COX6C/IMMT/COX4I1/NDUFA8/STOML2/TIMM13	14	Protein
CC	GO:0005758	Mitochondrial intermembrane space	13/395	87/19880	1.67295e-08	3.2503e-07	2.57441e-07	AGK/AIFM1/SUOX/AK2/HTRA2/UQCC2/CYCS/COX6C/IMMT/COX4I1/NDUFA8/STOML2/TIMM13	13	Protein
CC	GO:0110142	Ubiquinone biosynthesis complex	5/395	6/19880	1.78269e-08	3.30608e-07	2.61859e-07	COQ3/COQ9/COQ6/COQ5/COQ7	5	Protein
CC	GO:0045252	Oxoglutarate dehydrogenase complex	6/395	11/19880	2.51633e-08	4.46375e-07	3.53553e-07	BCKDHA/BCKDHB/DLST/DBT/DLD/OGDH	6	Protein
CC	GO:0031314	Extrinsic component of mitochondrial inner membrane	4/395	6/19880	2.23128e-06	3.79318e-05	3.0044e-05	COQ3/COQ6/COQ5/COQ7	4	Protein
CC	GO:0034774	Secretory granule lumen	21/395	324/19880	2.3374e-06	3.81463e-05	3.02139e-05	COTL1/GYG1/ACTN4/ACTN1/S100A11/MVP/GSTP1/MAPK1/SERPINB1/PYGL/MIF/GNS/C3/SPTAN1/TUBB/ANXA2/FGB/CPPED1/HP/CTSZ/ACAA1	21	Protein
CC	GO:0060205	Cytoplasmic vesicle lumen	21/395	329/19880	2.97506e-06	4.66856e-05	3.69775e-05	COTL1/GYG1/ACTN4/ACTN1/S100A11/MVP/GSTP1/MAPK1/SERPINB1/PYGL/MIF/GNS/C3/SPTAN1/TUBB/ANXA2/FGB/CPPED1/HP/CTSZ/ACAA1	21	Protein
CC	GO:0031983	Vesicle lumen	21/395	330/19880	3.12017e-06	4.71492e-05	3.73447e-05	COTL1/GYG1/ACTN4/ACTN1/S100A11/MVP/GSTP1/MAPK1/SERPINB1/PYGL/MIF/GNS/C3/SPTAN1/TUBB/ANXA2/FGB/CPPED1/HP/CTSZ/ACAA1	21	Protein
CC	GO:0001401	Sam complex	5/395	13/19880	3.40776e-06	4.79436e-05	3.79739e-05	APOO/HSPA9/IMMT/CHCHD3/MTX2	5	Protein
CC	GO:0140275	Mib complex	5/395	13/19880	3.40776e-06	4.79436e-05	3.79739e-05	APOO/HSPA9/IMMT/CHCHD3/MTX2	5	Protein
CC	GO:0005777	Peroxisome	12/395	147/19880	3.85581e-05	0.000507474	0.000401947	HMGCL/PECR/HSDL2/ECH1/ECI2/IDH2/ACSL1/CRAT/EHHADH/SCP2/MTARC2/ACAA1	12	Protein
CC	GO:0042579	Microbody	12/395	147/19880	3.85581e-05	0.000507474	0.000401947	HMGCL/PECR/HSDL2/ECH1/ECI2/IDH2/ACSL1/CRAT/EHHADH/SCP2/MTARC2/ACAA1	12	Protein
CC	GO:0005742	Mitochondrial outer membrane translocase complex	5/395	22/19880	6.016e-05	0.000767041	0.000607537	APOO/HSPA9/IMMT/CHCHD3/MTX2	5	Protein
CC	GO:0005782	Peroxisomal matrix	7/395	52/19880	7.17774e-05	0.000861328	0.000682218	HMGCL/ECH1/ECI2/CRAT/EHHADH/SCP2/ACAA1	7	Protein
CC	GO:0031907	Microbody lumen	7/395	52/19880	7.17774e-05	0.000861328	0.000682218	HMGCL/ECH1/ECI2/CRAT/EHHADH/SCP2/ACAA1	7	Protein
CC	GO:0098799	Outer mitochondrial membrane protein complex	5/395	23/19880	7.56237e-05	0.000869054	0.000688337	APOO/HSPA9/IMMT/CHCHD3/MTX2	5	Protein
CC	GO:0030018	Z disc	11/395	134/19880	7.66932e-05	0.000869054	0.000688337	CRYAB/MYL9/ACTN4/ACTN1/BIN1/HSPB1/GLRX3/CFL2/ANK2/DMD/PPP2R5A	11	Protein
CC	GO:0045121	Membrane raft	17/395	291/19880	7.88113e-05	0.000869054	0.000688337	MYOF/PLPP1/S100A10/CORO1C/MAPK1/LDHB/MAPK3/TUBB/ANXA2/MYADM/MME/HK1/ATP5F1A/DMD/VDAC2/STOML2/SERPINH1	17	Protein
CC	GO:0098857	Membrane microdomain	17/395	293/19880	8.56971e-05	0.000920117	0.000728782	MYOF/PLPP1/S100A10/CORO1C/MAPK1/LDHB/MAPK3/TUBB/ANXA2/MYADM/MME/HK1/ATP5F1A/DMD/VDAC2/STOML2/SERPINH1	17	Protein
CC	GO:0031312	Extrinsic component of organelle membrane	5/395	25/19880	0.000115564	0.00117876	0.000933639	BIN1/COQ3/COQ6/COQ5/COQ7	5	Protein
CC	GO:0045277	Respiratory chain complex iv	5/395	25/19880	0.000115564	0.00117876	0.000933639	COX7A2/COX6C/COX4I1/MT-CO2/COX7A1	5	Protein
CC	GO:1904813	Ficolin-1-rich granule lumen	10/395	124/19880	0.000186951	0.00186039	0.00147353	COTL1/GYG1/MVP/CAPN1/GSTP1/MAPK1/PYGL/MIF/GNS/CTSZ	10	Protein
CC	GO:0031674	I band	11/395	150/19880	0.000209463	0.00203478	0.00161166	CRYAB/MYL9/ACTN4/ACTN1/BIN1/HSPB1/GLRX3/CFL2/ANK2/DMD/PPP2R5A	11	Protein
CC	GO:0005744	Tim23 mitochondrial import inner membrane translocase complex	4/395	16/19880	0.000231169	0.00219342	0.0017373	GRPEL1/SLC25A6/HSPA9/TIMM50	4	Protein
CC	GO:0005757	Mitochondrial permeability transition pore complex	3/395	7/19880	0.000256757	0.00238083	0.00188575	SLC25A5/SLC25A4/PPIF	3	Protein
CC	GO:0031143	Pseudopodium	4/395	18/19880	0.000376628	0.00341476	0.00270467	ACTN4/ACTN1/MAPK1/MAPK3	4	Protein
CC	GO:0044284	Mitochondrial crista junction	3/395	8/19880	0.000404758	0.00359002	0.00284349	APOO/IMMT/CHCHD3	3	Protein
CC	GO:0061617	Micos complex	3/395	9/19880	0.0005982	0.00519288	0.00411304	APOO/IMMT/CHCHD3	3	Protein
CC	GO:0034361	Very-low-density lipoprotein particle	4/395	21/19880	0.00070273	0.0058513	0.00463454	APOO/APOC3/APOB/APOC1	4	Protein
CC	GO:0034385	Triglyceride-rich plasma lipoprotein particle	4/395	21/19880	0.00070273	0.0058513	0.00463454	APOO/APOC3/APOB/APOC1	4	Protein
CC	GO:0032994	Protein-lipid complex	5/395	40/19880	0.00112109	0.00914808	0.00724577	BIN1/APOO/APOC3/APOB/APOC1	5	Protein
CC	GO:0101002	Ficolin-1-rich granule	11/395	185/19880	0.00122302	0.00978416	0.00774958	COTL1/GYG1/MVP/CAPN1/GSTP1/MAPK1/PYGL/MIF/GNS/COPB1/CTSZ	11	Protein
CC	GO:0030016	Myofibril	13/395	244/19880	0.00125413	0.0098401	0.00779389	CRYAB/MYL9/ACTN4/CORO1C/ACTN1/BIN1/HSPB1/GLRX3/CFL2/ANK2/DMD/PPP2R5A/TWF2	13	Protein
CC	GO:0046930	Pore complex	4/395	26/19880	0.0016231	0.0123045	0.0097458	SLC25A5/SLC25A4/PPIF/VDAC2	4	Protein
CC	GO:0042470	Melanosome	8/395	111/19880	0.00168621	0.0123045	0.0097458	NAP1L1/RAB9A/ANXA2/ANXA11/BSG/FASN/TFRC/SLC3A2	8	Protein
CC	GO:0048770	Pigment granule	8/395	111/19880	0.00168621	0.0123045	0.0097458	NAP1L1/RAB9A/ANXA2/ANXA11/BSG/FASN/TFRC/SLC3A2	8	Protein
CC	GO:0030017	Sarcomere	12/395	222/19880	0.00168885	0.0123045	0.0097458	CRYAB/MYL9/ACTN4/CORO1C/ACTN1/BIN1/HSPB1/GLRX3/CFL2/ANK2/DMD/PPP2R5A	12	Protein
CC	GO:0043292	Contractile muscle fiber	13/395	254/19880	0.00179468	0.0128461	0.0101748	CRYAB/MYL9/ACTN4/CORO1C/ACTN1/BIN1/HSPB1/GLRX3/CFL2/ANK2/DMD/PPP2R5A/TWF2	13	Protein
CC	GO:0042627	Chylomicron	3/395	13/19880	0.00191972	0.0135042	0.0106961	APOC3/APOB/APOC1	3	Protein
CC	GO:0030055	Cell-substrate junction	18/395	434/19880	0.00280958	0.019429	0.0153888	ACTN4/CORO1C/FHL1/ANXA5/ITGB5/ACTN1/CAPN1/MAPK1/HSPB1/ARPC2/MAPK3/MME/BSG/HSPA9/NPM1/DMD/RPL5/RPL7	18	Protein
CC	GO:0032432	Actin filament bundle	7/395	95/19880	0.00286288	0.0194676	0.0154193	CRYAB/MYL9/ACTN4/LIMCH1/ACTN1/PLS3/FSCN1	7	Protein
CC	GO:1905369	Endopeptidase complex	7/395	98/19880	0.003408	0.0227945	0.0180545	CAPN1/HSPB1/USP14/PMPCA/HTRA2/PMPCB/PSMD4	7	Protein
CC	GO:0034363	Intermediate-density lipoprotein particle	2/395	5/19880	0.00378464	0.0241271	0.0191099	APOC3/APOB	2	Protein
CC	GO:0099128	Mitochondrial [2fe-2s] assembly complex	2/395	5/19880	0.00378464	0.0241271	0.0191099	NDUFAB1/NFS1	2	Protein
CC	GO:1990221	L-cysteine desulfurase complex	2/395	5/19880	0.00378464	0.0241271	0.0191099	NDUFAB1/NFS1	2	Protein
CC	GO:1905368	Peptidase complex	8/395	129/19880	0.00428374	0.0268887	0.0212973	CAPN1/HSPB1/USP14/PMPCA/HTRA2/PMPCB/AFG3L2/PSMD4	8	Protein
CC	GO:0005925	Focal adhesion	17/395	424/19880	0.00508543	0.031089	0.0246242	ACTN4/CORO1C/FHL1/ANXA5/ITGB5/ACTN1/CAPN1/MAPK1/HSPB1/ARPC2/MAPK3/MME/BSG/HSPA9/NPM1/RPL5/RPL7	17	Protein
CC	GO:0030864	Cortical actin cytoskeleton	6/395	80/19880	0.00517344	0.031089	0.0246242	COTL1/DSTN/ACTN4/ACTN1/SPTAN1/MYADM	6	Protein
CC	GO:0034703	Cation channel complex	11/395	223/19880	0.00518151	0.031089	0.0246242	ATP5MG/ATP5MJ/ATP5MK/ATP5F1D/ATP5F1A/ATP5F1B/ATP5ME/ATP5PO/ATP5F1C/MT-ATP8/ATP5PB	11	Protein
CC	GO:0070937	Crd-mediated mrna stability complex	2/395	6/19880	0.0056025	0.0331278	0.026239	CSDE1/HNRNPU	2	Protein
CC	GO:1990229	Iron-sulfur cluster assembly complex	3/395	19/19880	0.00595449	0.0342332	0.0271145	GLRX3/NDUFAB1/NFS1	3	Protein
CC	GO:0034358	Plasma lipoprotein particle	4/395	37/19880	0.00604115	0.0342332	0.0271145	APOO/APOC3/APOB/APOC1	4	Protein
CC	GO:1990777	Lipoprotein particle	4/395	37/19880	0.00604115	0.0342332	0.0271145	APOO/APOC3/APOB/APOC1	4	Protein
CC	GO:0005769	Early endosome	17/395	440/19880	0.00726449	0.0406016	0.0321586	ANKFY1/MAPK1/SERPINB1/MAPK3/EEA1/ANXA2/SNX6/NME1/MME/PHB1/ANK2/HSPD1/APOC3/APOB/HLA-B/HLA-A/TFRC	17	Protein
CC	GO:0098842	Postsynaptic early endosome	2/395	7/19880	0.00774079	0.0421099	0.0333533	EEA1/SNX6	2	Protein
CC	GO:1990228	Sulfurtransferase complex	2/395	7/19880	0.00774079	0.0421099	0.0333533	NDUFAB1/NFS1	2	Protein
MF	GO:0009055	Electron transfer activity	32/389	116/18639	3.72423e-27	2.44741e-24	1.77288e-24	UQCRH/ETFB/ETFA/IDH3B/NDUFV2/UQCR10/UQCRFS1/UQCRC1/CYCS/ME2/NDUFS8/NDUFB10/SDHB/ETFDH/NDUFS3/CYC1/COX4I1/NDUFA8/SDHA/CYB5A/SDHC/NDUFV1/MT-ND5/MT-CO2/COX7A1/NDUFA10/NDUFS2/MT-ND4/NDUFB9/NDUFA5/NDUFB4/NDUFB3	32	Protein
MF	GO:0015078	Proton transmembrane transporter activity	38/389	185/18639	6.57906e-27	2.44741e-24	1.77288e-24	UQCRH/SLC25A5/SLC25A4/LETM1/ATP5MG/NDUFV2/UQCR10/SLC25A3/UQCRFS1/UQCRC1/ATP5F1D/ATP5F1A/ATP5F1B/NDUFS8/ATP5ME/NNT/NDUFB10/NDUFS3/CYC1/COX4I1/NDUFA8/CYB5A/ATP5PO/NDUFV1/ATP5F1C/MT-ND5/MT-CO2/MT-ATP8/ATP5PB/COX7A1/GHITM/NDUFA10/NDUFS2/MT-ND4/NDUFB9/NDUFA5/NDUFB4/NDUFB3	38	Protein
MF	GO:0015453	Oxidoreduction-driven active transmembrane transporter activity	24/389	68/18639	1.49421e-23	3.70564e-21	2.68434e-21	UQCRH/NDUFV2/UQCR10/UQCRFS1/UQCRC1/NDUFS8/NNT/NDUFB10/NDUFS3/CYC1/COX4I1/NDUFA8/CYB5A/NDUFV1/MT-ND5/MT-CO2/COX7A1/NDUFA10/NDUFS2/MT-ND4/NDUFB9/NDUFA5/NDUFB4/NDUFB3	24	Protein
MF	GO:0016614	Oxidoreductase activity, acting on ch-oh group of donors	28/389	132/18639	1.65836e-20	3.08456e-18	2.23443e-18	AKR1C3/LDHB/RDH5/HADHA/HADH/ADHFE1/DCXR/MDH2/LDHD/IDH3G/IDH3B/HSD17B10/HADHB/IDH3A/HIBADH/HSD17B12/IDH2/ADH1B/ADH1C/ME2/EHHADH/FASN/BDH1/HSD17B8/GPD1L/CBR4/GPD2/L2HGDH	28	Protein
MF	GO:0016616	Oxidoreductase activity, acting on the ch-oh group of donors, nad or nadp as acceptor	26/389	122/18639	3.511e-19	5.22437e-17	3.78449e-17	AKR1C3/LDHB/RDH5/HADHA/HADH/ADHFE1/DCXR/MDH2/LDHD/IDH3G/IDH3B/HSD17B10/HADHB/IDH3A/HIBADH/HSD17B12/IDH2/ADH1B/ADH1C/ME2/EHHADH/FASN/BDH1/HSD17B8/GPD1L/CBR4	26	Protein
MF	GO:0022853	Active monoatomic ion transmembrane transporter activity	25/389	118/18639	2.00581e-18	2.4872e-16	1.80171e-16	UQCRH/NDUFV2/UQCR10/UQCRFS1/UQCRC1/ATP5F1B/NDUFS8/NNT/NDUFB10/NDUFS3/CYC1/COX4I1/NDUFA8/CYB5A/NDUFV1/MT-ND5/MT-CO2/COX7A1/NDUFA10/NDUFS2/MT-ND4/NDUFB9/NDUFA5/NDUFB4/NDUFB3	25	Protein
MF	GO:0051287	Nad binding	18/389	54/18639	1.86274e-17	1.97982e-15	1.43417e-15	LDHB/ALDH1A1/HADHA/HADH/IDH3G/IDH3B/ALDH1B1/GLUD1/IDH3A/HIBADH/IDH2/ME2/EHHADH/NNT/HSD17B8/NDUFV1/GPD1L/NDUFS2	18	Protein
MF	GO:0016655	Oxidoreductase activity, acting on nad(p)h, quinone or similar compound as acceptor	18/389	58/18639	8.01305e-17	6.87373e-15	4.97927e-15	NQO1/AKR1C3/DCXR/NDUFV2/NDUFS8/NDUFB10/NDUFS3/NDUFA8/NDUFV1/CBR4/MT-ND5/NDUFA10/NDUFS2/MT-ND4/NDUFB9/NDUFA5/NDUFB4/NDUFB3	18	Protein
MF	GO:0016651	Oxidoreductase activity, acting on nad(p)h	21/389	88/18639	8.315e-17	6.87373e-15	4.97927e-15	NQO1/AKR1C3/POR/DCXR/AIFM1/NDUFV2/NDUFS8/NNT/NDUFB10/NDUFS3/NDUFA8/NDUFV1/CBR4/MT-ND5/NDUFA10/NDUFS2/MT-ND4/NDUFB9/NDUFA5/NDUFB4/NDUFB3	21	Protein
MF	GO:0016874	Ligase activity	27/389	167/18639	1.23628e-16	9.19792e-15	6.66289e-15	PCCA/MCCC2/SUCLA2/SUCLG1/PCCB/SUCLG2/PC/ATP5MG/MCCC1/WARS1/ACSF2/ACSL1/ATP5F1D/ATP5F1A/AK3/ATP5F1B/ACACA/ATP5ME/IARS2/ATP5PO/DARS2/SARS2/ATP5F1C/GLUL/MT-ATP8/ATP5PB/FARSB	27	Protein
MF	GO:0016627	Oxidoreductase activity, acting on the ch-ch group of donors	18/389	60/18639	1.5857e-16	1.07251e-14	7.76915e-15	AKR1C3/DECR1/GCDH/ACADM/PECR/ACADS/DHODH/ACADSB/ACADVL/ACAD8/CRAT/IVD/FASN/SDHB/TM7SF2/SDHA/ACADL/ACAA1	18	Protein
MF	GO:0003954	Nadh dehydrogenase activity	16/389	44/18639	2.333e-16	1.44646e-14	1.0478e-14	NQO1/AIFM1/NDUFV2/NDUFS8/NDUFB10/NDUFS3/NDUFA8/NDUFV1/MT-ND5/NDUFA10/NDUFS2/MT-ND4/NDUFB9/NDUFA5/NDUFB4/NDUFB3	16	Protein
MF	GO:0015399	Primary active transmembrane transporter activity	26/389	166/18639	1.02163e-15	5.84689e-14	4.23544e-14	UQCRH/NDUFV2/UQCR10/UQCRFS1/UQCRC1/ATP5F1B/NDUFS8/NNT/NDUFB10/NDUFS3/CYC1/COX4I1/NDUFA8/CYB5A/NDUFV1/MT-ND5/MT-CO2/ABCA8/COX7A1/NDUFA10/NDUFS2/MT-ND4/NDUFB9/NDUFA5/NDUFB4/NDUFB3	26	Protein
MF	GO:0016620	Oxidoreductase activity, acting on the aldehyde or oxo group of donors, nad or nadp as acceptor	15/389	40/18639	1.1881e-15	6.31389e-14	4.57373e-14	AKR1C3/ALDH1A1/ALDH6A1/BCKDHA/PDHX/DLAT/PDHB/PDHA1/BCKDHB/ALDH1B1/DBT/ALDH7A1/DLD/ALDH5A1/OGDH	15	Protein
MF	GO:0016903	Oxidoreductase activity, acting on the aldehyde or oxo group of donors	15/389	46/18639	1.34869e-14	6.68951e-13	4.84582e-13	AKR1C3/ALDH1A1/ALDH6A1/BCKDHA/PDHX/DLAT/PDHB/PDHA1/BCKDHB/ALDH1B1/DBT/ALDH7A1/DLD/ALDH5A1/OGDH	15	Protein
MF	GO:0008137	Nadh dehydrogenase (ubiquinone) activity	14/389	41/18639	4.98198e-14	2.31662e-12	1.67814e-12	NDUFV2/NDUFS8/NDUFB10/NDUFS3/NDUFA8/NDUFV1/MT-ND5/NDUFA10/NDUFS2/MT-ND4/NDUFB9/NDUFA5/NDUFB4/NDUFB3	14	Protein
MF	GO:0050660	Flavin adenine dinucleotide binding	18/389	86/18639	1.5939e-13	6.97568e-12	5.05312e-12	POR/TXNRD1/GCDH/ACADM/LDHD/ETFA/ACADS/AIFM1/ACADSB/TXNRD2/DLD/COQ6/ACADVL/ACAD8/IVD/ETFDH/SDHA/ACADL	18	Protein
MF	GO:0022804	Active transmembrane transporter activity	37/389	457/18639	1.9001e-12	7.85376e-11	5.6892e-11	UQCRH/SLC16A7/SLC25A1/SLC25A10/SLC25A5/SLC25A4/LETM1/SLC25A6/NDUFV2/UQCR10/SLC25A11/SLC25A3/UQCRFS1/UQCRC1/ATP5F1B/NDUFS8/NNT/NDUFB10/NDUFS3/CYC1/COX4I1/NDUFA8/CYB5A/NDUFV1/MT-ND5/MT-CO2/ABCA8/SLC25A24/COX7A1/GHITM/NDUFA10/NDUFS2/MT-ND4/NDUFB9/NDUFA5/NDUFB4/NDUFB3	37	Protein
MF	GO:0003995	Acyl-coa dehydrogenase activity	8/389	12/18639	1.54224e-11	5.73712e-10	4.15592e-10	GCDH/ACADM/ACADS/ACADSB/ACADVL/ACAD8/IVD/ACADL	8	Protein
MF	GO:0052890	Oxidoreductase activity, acting on the ch-ch group of donors, with a flavin as acceptor	8/389	12/18639	1.54224e-11	5.73712e-10	4.15592e-10	GCDH/ACADM/ACADS/ACADSB/ACADVL/ACAD8/IVD/ACADL	8	Protein
MF	GO:0046933	Proton-transporting atp synthase activity, rotational mechanism	9/389	18/18639	2.82183e-11	9.99734e-10	7.24199e-10	ATP5MG/ATP5F1D/ATP5F1A/ATP5F1B/ATP5ME/ATP5PO/ATP5F1C/MT-ATP8/ATP5PB	9	Protein
MF	GO:0016829	Lyase activity	23/389	200/18639	3.49018e-11	1.18031e-09	8.5501e-10	BCKDHA/HADHA/HMGCL/ECHS1/ACO2/AUH/PCK2/FH/HADHB/MGST3/PCK1/FECH/ME2/EHHADH/FASN/CLYBL/ECHDC3/ECHDC2/DGLUCY/KYAT3/SHMT2/SHMT1/MGST2	23	Protein
MF	GO:0051540	Metal cluster binding	15/389	77/18639	5.16234e-11	1.66991e-09	1.20967e-09	GSTP1/GLRX3/ACO2/NDUFV2/UQCRFS1/FECH/NDUFS8/SDHB/ETFDH/NFU1/NDUFV1/NUBPL/CISD1/NDUFS2/NFS1	15	Protein
MF	GO:0051536	Iron-sulfur cluster binding	14/389	76/18639	5.00766e-10	1.55238e-08	1.12453e-08	GLRX3/ACO2/NDUFV2/UQCRFS1/FECH/NDUFS8/SDHB/ETFDH/NFU1/NDUFV1/NUBPL/CISD1/NDUFS2/NFS1	14	Protein
MF	GO:0003988	Acetyl-coa c-acyltransferase activity	6/389	7/18639	5.47096e-10	1.56554e-08	1.13406e-08	ACAA2/HADHA/ACAT1/HADHB/SCP2/ACAA1	6	Protein
MF	GO:0016885	Ligase activity, forming carbon-carbon bonds	6/389	7/18639	5.47096e-10	1.56554e-08	1.13406e-08	PCCA/MCCC2/PCCB/PC/MCCC1/ACACA	6	Protein
MF	GO:0030170	Pyridoxal phosphate binding	12/389	56/18639	1.40774e-09	3.87909e-08	2.80998e-08	PSAT1/PNPO/PYGL/MTARC1/GPT2/PYGM/MTARC2/KYAT3/CISD1/SHMT2/SHMT1/NFS1	12	Protein
MF	GO:0070279	Vitamin b6 binding	12/389	57/18639	1.74992e-09	4.64979e-08	3.36827e-08	PSAT1/PNPO/PYGL/MTARC1/GPT2/PYGM/MTARC2/KYAT3/CISD1/SHMT2/SHMT1/NFS1	12	Protein
MF	GO:0015252	Proton channel activity	9/389	27/18639	2.30309e-09	5.90862e-08	4.28016e-08	ATP5MG/ATP5F1D/ATP5F1A/ATP5F1B/ATP5ME/ATP5PO/ATP5F1C/MT-ATP8/ATP5PB	9	Protein
MF	GO:0019842	Vitamin binding	18/389	150/18639	2.46471e-09	6.11249e-08	4.42784e-08	PSAT1/PNPO/PYGL/PCCA/PC/MCCC1/MTARC1/OGDH/GPT2/FASN/PYGM/MTARC2/MMUT/KYAT3/CISD1/SHMT2/SHMT1/NFS1	18	Protein
MF	GO:0003857	3-hydroxyacyl-coa dehydrogenase activity	5/389	6/18639	2.27661e-08	4.70499e-07	3.40826e-07	HADHA/HADH/HSD17B10/HADHB/EHHADH	5	Protein
MF	GO:0003985	Acetyl-coa c-acetyltransferase activity	5/389	6/18639	2.27661e-08	4.70499e-07	3.40826e-07	ACAA2/HADHA/ACAT1/HADHB/ACAA1	5	Protein
MF	GO:0004738	Pyruvate dehydrogenase activity	5/389	6/18639	2.27661e-08	4.70499e-07	3.40826e-07	PDHX/DLAT/PDHB/PDHA1/DLD	5	Protein
MF	GO:0016421	Coa carboxylase activity	5/389	6/18639	2.27661e-08	4.70499e-07	3.40826e-07	PCCA/MCCC2/PCCB/MCCC1/ACACA	5	Protein
MF	GO:0034603	Pyruvate dehydrogenase [nad(p)+] activity	5/389	6/18639	2.27661e-08	4.70499e-07	3.40826e-07	PDHX/DLAT/PDHB/PDHA1/DLD	5	Protein
MF	GO:0034604	Pyruvate dehydrogenase (nad+) activity	5/389	6/18639	2.27661e-08	4.70499e-07	3.40826e-07	PDHX/DLAT/PDHB/PDHA1/DLD	5	Protein
MF	GO:0004300	Enoyl-coa hydratase activity	6/389	12/18639	6.6081e-08	1.32876e-06	9.62546e-07	HADHA/ECHS1/AUH/HADHB/EHHADH/ECHDC3	6	Protein
MF	GO:0008121	Ubiquinol-cytochrome-c reductase activity	5/389	7/18639	7.83136e-08	1.49398e-06	1.08223e-06	UQCRH/UQCR10/UQCRFS1/UQCRC1/CYC1	5	Protein
MF	GO:0016453	C-acetyltransferase activity	5/389	7/18639	7.83136e-08	1.49398e-06	1.08223e-06	ACAA2/HADHA/ACAT1/HADHB/ACAA1	5	Protein
MF	GO:0016624	Oxidoreductase activity, acting on the aldehyde or oxo group of donors, disulfide as acceptor	5/389	8/18639	2.05253e-07	3.81771e-06	2.76552e-06	BCKDHA/PDHB/PDHA1/BCKDHB/OGDH	5	Protein
MF	GO:0016209	Antioxidant activity	12/389	86/18639	2.19453e-07	3.98228e-06	2.88473e-06	NQO1/HBG1/TXN/GSTT1/GSTP1/TXNRD1/HP/TXNRD2/SOD2/MGST3/GSTZ1/MGST2	12	Protein
MF	GO:0016863	Intramolecular oxidoreductase activity, transposing c=c bonds	6/389	15/18639	3.39394e-07	6.01211e-06	4.35513e-06	MIF/ECHS1/ECI1/ECH1/ECI2/EHHADH	6	Protein
MF	GO:0016679	Oxidoreductase activity, acting on diphenols and related substances as donors	5/389	9/18639	4.539e-07	7.85352e-06	5.68903e-06	UQCRH/UQCR10/UQCRFS1/UQCRC1/CYC1	5	Protein
MF	GO:0016836	Hydro-lyase activity	10/389	61/18639	4.88071e-07	8.25283e-06	5.97828e-06	HADHA/ECHS1/ACO2/AUH/FH/HADHB/EHHADH/FASN/ECHDC3/DGLUCY	10	Protein
MF	GO:0000062	Fatty-acyl-coa binding	6/389	16/18639	5.33491e-07	8.82038e-06	6.38941e-06	GCDH/HADHA/ECI2/ACADVL/SCP2/ACADL	6	Protein
MF	GO:0048038	Quinone binding	6/389	17/18639	8.10008e-07	1.28223e-05	9.28833e-06	SDHB/ETFDH/HSD17B8/CBR4/NDUFS2/MT-ND4	6	Protein
MF	GO:1901567	Fatty acid derivative binding	6/389	17/18639	8.10008e-07	1.28223e-05	9.28833e-06	GCDH/HADHA/ECI2/ACADVL/SCP2/ACADL	6	Protein
MF	GO:0004448	Isocitrate dehydrogenase [nad(p)+] activity	4/389	5/18639	9.18885e-07	1.42427e-05	1.03173e-05	IDH3G/IDH3B/IDH3A/IDH2	4	Protein
MF	GO:0033218	Amide binding	19/389	247/18639	1.15511e-06	1.75388e-05	1.2705e-05	CRYAB/FKBP2/PCCA/GCDH/HADHA/ACAT1/PC/PHB2/MCCC1/ECI2/PPIF/ACADVL/SCP2/FASN/ACADL/VDAC2/FKBP4/MGST2/FKBP5	19	Protein
MF	GO:0005536	D-glucose binding	5/389	11/18639	1.60774e-06	2.39232e-05	1.73298e-05	UGP2/PYGL/HK2/HK1/GYS1	5	Protein
MF	GO:0120227	Acyl-coa binding	6/389	19/18639	1.714e-06	2.50042e-05	1.81129e-05	GCDH/HADHA/ECI2/ACADVL/SCP2/ACADL	6	Protein
MF	GO:0016408	C-acyltransferase activity	6/389	20/18639	2.40562e-06	3.44189e-05	2.49327e-05	ACAA2/HADHA/ACAT1/HADHB/SCP2/ACAA1	6	Protein
MF	GO:0051539	4 iron, 4 sulfur cluster binding	8/389	45/18639	3.67458e-06	5.15827e-05	3.73661e-05	ACO2/NDUFS8/SDHB/ETFDH/NFU1/NDUFV1/NUBPL/NDUFS2	8	Protein
MF	GO:0016835	Carbon-oxygen lyase activity	10/389	79/18639	5.58582e-06	7.5561e-05	5.47357e-05	HADHA/ECHS1/ACO2/AUH/FH/HADHB/EHHADH/FASN/ECHDC3/DGLUCY	10	Protein
MF	GO:0033293	Monocarboxylic acid binding	10/389	79/18639	5.58582e-06	7.5561e-05	5.47357e-05	AKR1C3/GSTP1/PYGL/PCCA/PC/MCCC1/DBT/NDUFAB1/APOC1/SCP2	10	Protein
MF	GO:0016853	Isomerase activity	15/389	180/18639	5.8993e-06	7.83764e-05	5.67752e-05	MIF/FKBP2/ECHS1/ECI1/FAHD2A/HSPD1/ECH1/ECI2/PPIF/GSTZ1/EHHADH/MMUT/MCEE/FKBP4/FKBP5	15	Protein
MF	GO:0051082	Unfolded protein binding	12/389	121/18639	8.7224e-06	0.00011385	8.24722e-05	CRYAB/HSPB6/HSPB1/NAP1L4/GRPEL1/HSPE1/HSPD1/HSPA9/HTRA2/NPM1/AFG3L2/SERPINH1	12	Protein
MF	GO:0016830	Carbon-carbon lyase activity	8/389	51/18639	9.73208e-06	0.000124839	9.04324e-05	BCKDHA/HMGCL/PCK2/PCK1/ME2/CLYBL/SHMT2/SHMT1	8	Protein
MF	GO:0051537	2 iron, 2 sulfur cluster binding	6/389	28/18639	2.03e-05	0.000254952	0.000184685	NDUFV2/UQCRFS1/FECH/SDHB/NFU1/CISD1	6	Protein
MF	GO:1901681	Sulfur compound binding	18/389	275/18639	2.05606e-05	0.000254952	0.000184685	SULT1A1/GSTP1/GNS/PCCA/GCDH/HADHA/ACAT1/PC/MCCC1/HSD17B12/DBT/ECI2/ACADVL/APOB/OGDH/SCP2/ACADL/MGST2	18	Protein
MF	GO:0005200	Structural constituent of cytoskeleton	11/389	112/18639	2.26195e-05	0.000275884	0.000199848	MYL9/ARPC2/TUBA1B/TUBA1A/SPTAN1/TUBB/TUBB6/TUBB2A/ANK2/LMNB2/DMD	11	Protein
MF	GO:0016747	Acyltransferase activity, transferring groups other than amino-acyl groups	16/389	229/18639	2.67952e-05	0.000321543	0.000232923	ACAA2/HADHA/ACAT1/DLAT/OXSM/DLST/HADHB/DBT/CRAT/SCP2/FASN/CPT2/GLUL/GPAM/ACAA1/DGAT1	16	Protein
MF	GO:0016790	Thiolester hydrolase activity	7/389	44/18639	3.21729e-05	0.000379946	0.00027523	ACAA2/HIBCH/ACOT13/LYPLAL1/FASN/ABHD10/ACOT1	7	Protein
MF	GO:0015217	Adp transmembrane transporter activity	4/389	11/18639	5.48881e-05	0.000628257	0.000455104	SLC25A5/SLC25A4/SLC25A6/SLC25A24	4	Protein
MF	GO:0016668	Oxidoreductase activity, acting on a sulfur group of donors, nad(p) as acceptor	4/389	11/18639	5.48881e-05	0.000628257	0.000455104	TXN/TXNRD1/TXNRD2/DLD	4	Protein
MF	GO:0004740	Pyruvate dehydrogenase (acetyl-transferring) kinase activity	3/389	5/18639	8.74384e-05	0.000942814	0.000682967	PDK1/PDK2/PDK4	3	Protein
MF	GO:0005471	Atp:adp antiporter activity	3/389	5/18639	8.74384e-05	0.000942814	0.000682967	SLC25A5/SLC25A4/SLC25A6	3	Protein
MF	GO:0009374	Biotin binding	3/389	5/18639	8.74384e-05	0.000942814	0.000682967	PCCA/PC/MCCC1	3	Protein
MF	GO:0016635	Oxidoreductase activity, acting on the ch-ch group of donors, quinone or related compound as acceptor	3/389	5/18639	8.74384e-05	0.000942814	0.000682967	DHODH/SDHB/SDHA	3	Protein
MF	GO:0004022	Alcohol dehydrogenase (nad+) activity	5/389	23/18639	9.52267e-05	0.000997868	0.000722847	AKR1C3/RDH5/ADHFE1/ADH1B/ADH1C	5	Protein
MF	GO:0004602	Glutathione peroxidase activity	5/389	23/18639	9.52267e-05	0.000997868	0.000722847	GSTT1/GSTP1/MGST3/GSTZ1/MGST2	5	Protein
MF	GO:0000287	Magnesium ion binding	15/389	230/18639	0.000103811	0.00107271	0.000777065	COMT/NUDT5/NME1/SUCLA2/HMGCL/SUCLG2/IDH3G/IDH3B/IDH3A/IDH2/PPA2/DUT/PCK1/CLYBL/FARSB	15	Protein
MF	GO:0016860	Intramolecular oxidoreductase activity	7/389	53/18639	0.000110153	0.00112265	0.00081324	MIF/ECHS1/ECI1/FAHD2A/ECH1/ECI2/EHHADH	7	Protein
MF	GO:0051015	Actin filament binding	14/389	209/18639	0.000132534	0.00133251	0.000965257	COTL1/DSTN/ACTN4/CORO1C/ACTN1/BIN1/ARPC2/SCIN/ARPC1A/CFL2/SPTAN1/PLS3/FSCN1/TWF2	14	Protein
MF	GO:0008483	Transaminase activity	5/389	25/18639	0.000145282	0.0014412	0.00104399	PSAT1/BCAT2/GPT2/KYAT3/CISD1	5	Protein
MF	GO:0005347	Atp transmembrane transporter activity	4/389	14/18639	0.000158417	0.00153126	0.00110923	SLC25A5/SLC25A4/SLC25A6/SLC25A24	4	Protein
MF	GO:0031406	Carboxylic acid binding	13/389	187/18639	0.000158477	0.00153126	0.00110923	AKR1C3/GSTP1/PYGL/PCCA/PC/GLUD1/MCCC1/DBT/NDUFAB1/PCK1/APOC1/SCP2/SHMT1	13	Protein
MF	GO:0043546	Molybdopterin cofactor binding	3/389	6/18639	0.000172166	0.0016177	0.00117185	SUOX/MTARC1/MTARC2	3	Protein
MF	GO:0048039	Ubiquinone binding	3/389	6/18639	0.000172166	0.0016177	0.00117185	SDHB/ETFDH/MT-ND4	3	Protein
MF	GO:0004601	Peroxidase activity	7/389	57/18639	0.000175899	0.0016177	0.00117185	HBG1/GSTT1/GSTP1/TXNRD1/MGST3/GSTZ1/MGST2	7	Protein
MF	GO:0043177	Organic acid binding	13/389	189/18639	0.000176121	0.0016177	0.00117185	AKR1C3/GSTP1/PYGL/PCCA/PC/GLUD1/MCCC1/DBT/NDUFAB1/PCK1/APOC1/SCP2/SHMT1	13	Protein
MF	GO:0016407	Acetyltransferase activity	9/389	96/18639	0.000179312	0.00162693	0.00117853	ACAA2/HADHA/ACAT1/DLAT/HADHB/DBT/CRAT/FASN/ACAA1	9	Protein
MF	GO:0004129	Cytochrome-c oxidase activity	4/389	15/18639	0.000212476	0.00188931	0.0013686	COX4I1/CYB5A/MT-CO2/COX7A1	4	Protein
MF	GO:0004364	Glutathione transferase activity	5/389	27/18639	0.000213309	0.00188931	0.0013686	GSTT1/GSTP1/MGST3/GSTZ1/MGST2	5	Protein
MF	GO:0016684	Oxidoreductase activity, acting on peroxide as acceptor	7/389	59/18639	0.000219009	0.00191697	0.00138864	HBG1/GSTT1/GSTP1/TXNRD1/MGST3/GSTZ1/MGST2	7	Protein
MF	GO:0016675	Oxidoreductase activity, acting on a heme group of donors	4/389	16/18639	0.000278653	0.00238297	0.0017262	COX4I1/CYB5A/MT-CO2/COX7A1	4	Protein
MF	GO:0055102	Lipase inhibitor activity	4/389	16/18639	0.000278653	0.00238297	0.0017262	ANXA5/ANXA2/APOC3/APOC1	4	Protein
MF	GO:0003997	Acyl-coa oxidase activity	3/389	7/18639	0.000296624	0.00245209	0.00177627	CRAT/ACADL/ACAA1	3	Protein
MF	GO:0004176	Atp-dependent peptidase activity	3/389	7/18639	0.000296624	0.00245209	0.00177627	CLPP/AFG3L2/LONP1	3	Protein
MF	GO:0004791	Thioredoxin-disulfide reductase (nadph) activity	3/389	7/18639	0.000296624	0.00245209	0.00177627	TXN/TXNRD1/TXNRD2	3	Protein
MF	GO:0016769	Transferase activity, transferring nitrogenous groups	5/389	30/18639	0.000357673	0.00289852	0.00209966	PSAT1/BCAT2/GPT2/KYAT3/CISD1	5	Protein
MF	GO:0070403	Nad+ binding	4/389	17/18639	0.000358419	0.00289852	0.00209966	HADHA/HADH/GLUD1/EHHADH	4	Protein
MF	GO:0016878	Acid-thiol ligase activity	5/389	31/18639	0.00041922	0.00335376	0.00242944	SUCLA2/SUCLG1/SUCLG2/ACSF2/ACSL1	5	Protein
MF	GO:0016742	Hydroxymethyl-, formyl- and related transferase activity	3/389	8/18639	0.000467256	0.00365935	0.0026508	GCSH/SHMT2/SHMT1	3	Protein
MF	GO:0047035	Testosterone dehydrogenase (nad+) activity	3/389	8/18639	0.000467256	0.00365935	0.0026508	AKR1C3/HSD17B10/HSD17B8	3	Protein
MF	GO:0033764	Steroid dehydrogenase activity, acting on the ch-oh group of donors, nad or nadp as acceptor	5/389	32/18639	0.000488427	0.00378531	0.00274205	AKR1C3/RDH5/HSD17B10/HSD17B12/HSD17B8	5	Protein
MF	GO:0004303	Estradiol 17-beta-dehydrogenase [nad(p)+] activity	4/389	19/18639	0.000564747	0.00425274	0.00308065	AKR1C3/HSD17B10/HSD17B12/HSD17B8	4	Protein
MF	GO:0005346	Purine ribonucleotide transmembrane transporter activity	4/389	19/18639	0.000564747	0.00425274	0.00308065	SLC25A5/SLC25A4/SLC25A6/SLC25A24	4	Protein
MF	GO:0016628	Oxidoreductase activity, acting on the ch-ch group of donors, nad or nadp as acceptor	5/389	33/18639	0.000565888	0.00425274	0.00308065	AKR1C3/DECR1/PECR/FASN/TM7SF2	5	Protein
MF	GO:0072341	Modified amino acid binding	8/389	91/18639	0.000629634	0.00468448	0.0033934	ANXA5/SCIN/ANXA2/ANXA11/MME/FASN/MMUT/MGST2	8	Protein
MF	GO:0044594	17-beta-hydroxysteroid dehydrogenase (nad+) activity	3/389	9/18639	0.000690051	0.00496752	0.00359843	AKR1C3/HSD17B10/HSD17B8	3	Protein
MF	GO:0047044	Androstan-3-alpha,17-beta-diol dehydrogenase (nad+) activity	3/389	9/18639	0.000690051	0.00496752	0.00359843	AKR1C3/RDH5/HSD17B10	3	Protein
MF	GO:0047134	Protein-disulfide reductase [nad(p)h] activity	3/389	9/18639	0.000690051	0.00496752	0.00359843	TXN/TXNRD1/TXNRD2	3	Protein
MF	GO:0004745	All-trans-retinol dehydrogenase (nad+) activity	4/389	20/18639	0.000694384	0.00496752	0.00359843	AKR1C3/RDH5/ADH1B/ADH1C	4	Protein
MF	GO:0018455	Alcohol dehydrogenase [nad(p)+] activity	6/389	52/18639	0.000719642	0.00509918	0.0036938	AKR1C3/RDH5/ADHFE1/DCXR/ADH1B/ADH1C	6	Protein
MF	GO:0016229	Steroid dehydrogenase activity	5/389	35/18639	0.000748032	0.00525034	0.0038033	AKR1C3/RDH5/HSD17B10/HSD17B12/HSD17B8	5	Protein
MF	GO:0016667	Oxidoreductase activity, acting on a sulfur group of donors	6/389	54/18639	0.000881591	0.00607318	0.00439936	TXN/GLRX/TXNRD1/SUOX/TXNRD2/DLD	6	Protein
MF	GO:0050661	Nadp binding	6/389	54/18639	0.000881591	0.00607318	0.00439936	POR/DECR1/HIBADH/NNT/TM7SF2/CBR4	6	Protein
MF	GO:0003725	Double-stranded rna binding	7/389	75/18639	0.000958327	0.00650542	0.00471247	ACTN1/TUBA1B/HSPD1/EIF4A1/HNRNPU/TFRC/SLC3A2	7	Protein
MF	GO:0005528	Fk506 binding	3/389	10/18639	0.000970567	0.00650542	0.00471247	FKBP2/FKBP4/FKBP5	3	Protein
MF	GO:0016634	Oxidoreductase activity, acting on the ch-ch group of donors, oxygen as acceptor	3/389	10/18639	0.000970567	0.00650542	0.00471247	CRAT/ACADL/ACAA1	3	Protein
MF	GO:0043531	Adp binding	5/389	38/18639	0.00109889	0.00729976	0.00528789	COQ8A/GLUD1/ATP5F1D/ATP5F1A/LONP1	5	Protein
MF	GO:0000295	Adenine nucleotide transmembrane transporter activity	4/389	23/18639	0.0012079	0.00795293	0.00576103	SLC25A5/SLC25A4/SLC25A6/SLC25A24	4	Protein
MF	GO:0019107	Myristoyltransferase activity	3/389	11/18639	0.00131395	0.00857523	0.00621182	HADHB/SCP2/ACAA1	3	Protein
MF	GO:0004812	Aminoacyl-trna ligase activity	5/389	41/18639	0.0015589	0.00991303	0.00718092	WARS1/IARS2/DARS2/SARS2/FARSB	5	Protein
MF	GO:0016875	Ligase activity, forming carbon-oxygen bonds	5/389	41/18639	0.0015589	0.00991303	0.00718092	WARS1/IARS2/DARS2/SARS2/FARSB	5	Protein
MF	GO:0016877	Ligase activity, forming carbon-sulfur bonds	5/389	41/18639	0.0015589	0.00991303	0.00718092	SUCLA2/SUCLG1/SUCLG2/ACSF2/ACSL1	5	Protein
MF	GO:0047617	Fatty acyl-coa hydrolase activity	4/389	25/18639	0.00166975	0.0105279	0.00762635	ACAA2/HIBCH/ACOT13/ACOT1	4	Protein
MF	GO:0004859	Phospholipase inhibitor activity	3/389	12/18639	0.00172494	0.0106946	0.00774708	ANXA5/ANXA2/APOC1	3	Protein
MF	GO:0005527	Macrolide binding	3/389	12/18639	0.00172494	0.0106946	0.00774708	FKBP2/FKBP4/FKBP5	3	Protein
MF	GO:0016859	Cis-trans isomerase activity	5/389	42/18639	0.00173971	0.0106971	0.00774886	FKBP2/PPIF/GSTZ1/FKBP4/FKBP5	5	Protein
MF	GO:0015216	Purine nucleotide transmembrane transporter activity	4/389	26/18639	0.0019412	0.0117419	0.00850571	SLC25A5/SLC25A4/SLC25A6/SLC25A24	4	Protein
MF	GO:0016289	Acyl-coa hydrolase activity	4/389	26/18639	0.0019412	0.0117419	0.00850571	ACAA2/HIBCH/ACOT13/ACOT1	4	Protein
MF	GO:0015297	Antiporter activity	9/389	135/18639	0.00212704	0.0127622	0.00924486	SLC25A1/SLC25A10/SLC25A5/SLC25A4/LETM1/SLC25A6/SLC25A11/SLC25A24/GHITM	9	Protein
MF	GO:0160215	Deacylase activity	6/389	65/18639	0.00232754	0.0138535	0.0100354	CES1/ACAA2/HIBCH/ACOT13/MACROD1/ACOT1	6	Protein
MF	GO:0005525	Gtp binding	17/389	378/18639	0.00261529	0.0154427	0.0111865	ARF4/TUBA1B/TUBA1A/GMPPB/RAB9A/TUBB/TUBB6/TUBB2A/NME1/SUCLG2/PCK2/GLUD1/GFM1/AK3/PCK1/TUFM/FKBP4	17	Protein
MF	GO:0030283	Testosterone dehydrogenase [nad(p)+] activity	3/389	14/18639	0.00276685	0.0160823	0.0116499	AKR1C3/HSD17B10/HSD17B8	3	Protein
MF	GO:0044548	S100 protein binding	3/389	14/18639	0.00276685	0.0160823	0.0116499	S100A11/ANXA2/ANXA11	3	Protein
MF	GO:0005504	Fatty acid binding	5/389	47/18639	0.00288161	0.0166195	0.0120391	GSTP1/DBT/NDUFAB1/APOC1/SCP2	5	Protein
MF	GO:0030145	Manganese ion binding	6/389	68/18639	0.00292758	0.0166741	0.0120786	GYG1/NPEPL1/HMGCL/PCK2/SOD2/PCK1	6	Protein
MF	GO:0016417	S-acyltransferase activity	4/389	29/18639	0.0029359	0.0166741	0.0120786	DLAT/DLST/FASN/GLUL	4	Protein
MF	GO:0052689	Carboxylic ester hydrolase activity	7/389	92/18639	0.00313016	0.0176427	0.0127802	CES1/BPHL/MACROD1/LYPLAL1/IARS2/ABHD10/ACOT1	7	Protein
MF	GO:0015215	Nucleotide transmembrane transporter activity	4/389	30/18639	0.00333255	0.0186422	0.0135043	SLC25A5/SLC25A4/SLC25A6/SLC25A24	4	Protein
MF	GO:0010181	Fmn binding	3/389	15/18639	0.00340545	0.0187678	0.0135952	PNPO/POR/NDUFV1	3	Protein
MF	GO:0016846	Carbon-sulfur lyase activity	3/389	15/18639	0.00340545	0.0187678	0.0135952	MGST3/KYAT3/MGST2	3	Protein
MF	GO:0015605	Organophosphate ester transmembrane transporter activity	5/389	50/18639	0.00378289	0.0206686	0.0149721	SLC25A5/SLC25A4/SLC35A4/SLC25A6/SLC25A24	5	Protein
MF	GO:0043021	Ribonucleoprotein complex binding	10/389	177/18639	0.004118	0.0206686	0.0149721	UCHL1/NME1/CSDE1/LETM1/NDUFAB1/C1QBP/NPM1/HNRNPU/SEC61A1/TIMM50	10	Protein
MF	GO:0003955	Nad(p)h dehydrogenase (quinone) activity	2/389	5/18639	0.00416705	0.0206686	0.0149721	NQO1/CBR4	2	Protein
MF	GO:0004340	Glucokinase activity	2/389	5/18639	0.00416705	0.0206686	0.0149721	HK2/HK1	2	Protein
MF	GO:0004396	Hexokinase activity	2/389	5/18639	0.00416705	0.0206686	0.0149721	HK2/HK1	2	Protein
MF	GO:0004464	Leukotriene-c4 synthase activity	2/389	5/18639	0.00416705	0.0206686	0.0149721	MGST3/MGST2	2	Protein
MF	GO:0004645	1,4-alpha-oligoglucan phosphorylase activity	2/389	5/18639	0.00416705	0.0206686	0.0149721	PYGL/PYGM	2	Protein
MF	GO:0004784	Superoxide dismutase activity	2/389	5/18639	0.00416705	0.0206686	0.0149721	NQO1/SOD2	2	Protein
MF	GO:0008410	Coa-transferase activity	2/389	5/18639	0.00416705	0.0206686	0.0149721	OXCT1/ACAA1	2	Protein
MF	GO:0008865	Fructokinase activity	2/389	5/18639	0.00416705	0.0206686	0.0149721	HK2/HK1	2	Protein
MF	GO:0015207	Adenine transmembrane transporter activity	2/389	5/18639	0.00416705	0.0206686	0.0149721	SLC25A5/SLC25A4	2	Protein
MF	GO:0016406	Carnitine o-acyltransferase activity	2/389	5/18639	0.00416705	0.0206686	0.0149721	CRAT/CPT2	2	Protein
MF	GO:0016721	Oxidoreductase activity, acting on superoxide radicals as acceptor	2/389	5/18639	0.00416705	0.0206686	0.0149721	NQO1/SOD2	2	Protein
MF	GO:0017077	Oxidative phosphorylation uncoupler activity	2/389	5/18639	0.00416705	0.0206686	0.0149721	SLC25A5/SLC25A4	2	Protein
MF	GO:0046912	Acyltransferase activity, acyl groups converted into alkyl on transfer	2/389	5/18639	0.00416705	0.0206686	0.0149721	CS/CLYBL	2	Protein
MF	GO:0048029	Monosaccharide binding	6/389	74/18639	0.00446521	0.0220008	0.0159372	UGP2/PYGL/HK2/BSG/HK1/GYS1	6	Protein
MF	GO:0019001	Guanyl nucleotide binding	17/389	400/18639	0.004622	0.0224756	0.0162812	ARF4/TUBA1B/TUBA1A/GMPPB/RAB9A/TUBB/TUBB6/TUBB2A/NME1/SUCLG2/PCK2/GLUD1/GFM1/AK3/PCK1/TUFM/FKBP4	17	Protein
MF	GO:0032561	Guanyl ribonucleotide binding	17/389	400/18639	0.004622	0.0224756	0.0162812	ARF4/TUBA1B/TUBA1A/GMPPB/RAB9A/TUBB/TUBB6/TUBB2A/NME1/SUCLG2/PCK2/GLUD1/GFM1/AK3/PCK1/TUFM/FKBP4	17	Protein
MF	GO:0044183	Protein folding chaperone	6/389	75/18639	0.00477015	0.0230454	0.0166939	HSPB6/HSPB1/HSPA4/HSPE1/HSPD1/HSPA9	6	Protein
MF	GO:1901505	Carbohydrate derivative transmembrane transporter activity	5/389	53/18639	0.00486999	0.023376	0.0169334	SLC25A5/SLC25A4/SLC35A4/SLC25A6/SLC25A24	5	Protein
MF	GO:0004029	Aldehyde dehydrogenase (nad+) activity	3/389	17/18639	0.00493457	0.0235341	0.0170479	ALDH1A1/ALDH1B1/ALDH7A1	3	Protein
MF	GO:0016831	Carboxy-lyase activity	4/389	34/18639	0.00528255	0.0250332	0.0181339	BCKDHA/PCK2/PCK1/ME2	4	Protein
MF	GO:0008374	O-acyltransferase activity	5/389	55/18639	0.00570743	0.0268077	0.0194193	ACAT1/CRAT/CPT2/GPAM/DGAT1	5	Protein
MF	GO:0003779	Actin binding	18/389	443/18639	0.00572906	0.0268077	0.0194193	TAGLN/COTL1/DSTN/ACTN4/CORO1C/LIMCH1/ACTN1/BIN1/ARPC2/SCIN/ARPC1A/CFL2/SPTAN1/PLS3/FSCN1/DMD/HNRNPU/TWF2	18	Protein
MF	GO:0004030	Aldehyde dehydrogenase [nad(p)+] activity	3/389	18/18639	0.00583083	0.0271134	0.0196407	ALDH1A1/ALDH1B1/ALDH7A1	3	Protein
MF	GO:0004457	Lactate dehydrogenase activity	2/389	6/18639	0.00616449	0.028311	0.0205082	LDHB/LDHD	2	Protein
MF	GO:0050833	Pyruvate transmembrane transporter activity	2/389	6/18639	0.00616449	0.028311	0.0205082	SLC16A7/MPC2	2	Protein
MF	GO:0140838	Rna polymerase ii ctd heptapeptide repeat peptidyl-prolyl isomerase activity	4/389	36/18639	0.00649436	0.0292836	0.0212128	FKBP2/PPIF/FKBP4/FKBP5	4	Protein
MF	GO:0140839	Rna polymerase ii ctd heptapeptide repeat p3 isomerase activity	4/389	36/18639	0.00649436	0.0292836	0.0212128	FKBP2/PPIF/FKBP4/FKBP5	4	Protein
MF	GO:0140840	Rna polymerase ii ctd heptapeptide repeat p6 isomerase activity	4/389	36/18639	0.00649436	0.0292836	0.0212128	FKBP2/PPIF/FKBP4/FKBP5	4	Protein
MF	GO:0015932	Nucleobase-containing compound transmembrane transporter activity	5/389	57/18639	0.00664153	0.0297669	0.0215629	SLC25A5/SLC25A4/SLC35A4/SLC25A6/SLC25A24	5	Protein
MF	GO:0051087	Protein-folding chaperone binding	8/389	134/18639	0.00714715	0.0318412	0.0230655	HSPB6/BIN1/FGB/GRPEL1/HSPE1/HSPD1/HLA-B/TFRC	8	Protein
MF	GO:0001786	Phosphatidylserine binding	5/389	59/18639	0.00767775	0.0340015	0.0246304	ANXA5/SCIN/ANXA2/ANXA11/MME	5	Protein
MF	GO:0042288	Mhc class i protein binding	3/389	20/18639	0.0078989	0.0347739	0.0251899	TUBB/ATP5F1A/ATP5F1B	3	Protein
MF	GO:0016833	Oxo-acid-lyase activity	2/389	7/18639	0.00851163	0.0366049	0.0265163	HMGCL/CLYBL	2	Protein
MF	GO:0016862	Intramolecular oxidoreductase activity, interconverting keto- and enol-groups	2/389	7/18639	0.00851163	0.0366049	0.0265163	MIF/FAHD2A	2	Protein
MF	GO:0046977	Tap binding	2/389	7/18639	0.00851163	0.0366049	0.0265163	HLA-B/HLA-A	2	Protein
MF	GO:0140608	Cysteine-type endopeptidase activator activity	2/389	7/18639	0.00851163	0.0366049	0.0265163	HSPD1/TIMM50	2	Protein
MF	GO:0003755	Peptidyl-prolyl cis-trans isomerase activity	4/389	39/18639	0.00863607	0.0369267	0.0267494	FKBP2/PPIF/FKBP4/FKBP5	4	Protein
MF	GO:0016765	Transferase activity, transferring alkyl or aryl (other than methyl) groups	5/389	61/18639	0.00882139	0.0375035	0.0271672	GSTT1/GSTP1/MGST3/GSTZ1/MGST2	5	Protein
MF	GO:0043022	Ribosome binding	7/389	112/18639	0.00910417	0.0384858	0.0278788	UCHL1/NME1/LETM1/NDUFAB1/C1QBP/NPM1/SEC61A1	7	Protein
MF	GO:0015036	Disulfide oxidoreductase activity	4/389	40/18639	0.00944094	0.039461	0.0285852	TXN/GLRX/TXNRD1/TXNRD2	4	Protein
MF	GO:0071949	Fad binding	4/389	40/18639	0.00944094	0.039461	0.0285852	TXNRD1/LDHD/AIFM1/COQ6	4	Protein
MF	GO:0001758	Retinal dehydrogenase activity	2/389	8/18639	0.0111931	0.0455063	0.0329644	AKR1C3/ALDH1A1	2	Protein
MF	GO:0003959	Nadph dehydrogenase activity	2/389	8/18639	0.0111931	0.0455063	0.0329644	NQO1/CBR4	2	Protein
MF	GO:0016615	Malate dehydrogenase activity	2/389	8/18639	0.0111931	0.0455063	0.0329644	MDH2/ME2	2	Protein
MF	GO:0018812	3-hydroxyacyl-coa dehydratase activity	2/389	8/18639	0.0111931	0.0455063	0.0329644	HADHA/EHHADH	2	Protein
MF	GO:0047023	Androsterone dehydrogenase [nad(p)+] activity	2/389	8/18639	0.0111931	0.0455063	0.0329644	AKR1C3/RDH5	2	Protein

## Sheet: Fig._1d
Figure 1d
KEGG ID	Description	setSize	enrichmentScore	NES	pvalue	p.adjust	qvalue	core_enrichment	From
hsa04814	Motor proteins	36	0.627184	2.28952	1.69315e-06	3.64678e-05	2.79678e-05	MYL9/DYNC1LI2/TUBA1B/TUBA1A/TUBB/TUBB6/TUBB2A/TUBB4B/DYNC1I2/DCTN2/DYNLRB1/DYNC1H1/DCTN3/TUBA1C/CAPZA1/MYH9/DCTN4/DCTN1/DYNLL1/ACTR1A	protein
hsa05132	Salmonella infection	66	0.547002	2.26387	5.61796e-08	1.96629e-06	1.50798e-06	TXN/MYL9/S100A10/DYNC1LI2/MAPK1/RAB5A/ARPC2/TUBA1B/TUBA1A/MAPK3/ARPC1A/RAB9A/TUBB/TUBB6/ANXA2/TUBB2A/FLNA/TUBB4B/DYNC1I2/DCTN2/DYNLRB1/DYNC1H1/DCTN3/PFN1/ACTR3/ARPC5L	protein
hsa04666	Fc gamma R-mediated phagocytosis	22	0.694499	2.24117	1.16176e-05	0.000203308	0.000155921	PLPP1/BIN1/MAPK1/ARPC2/MAPK3/SCIN/ARPC1A/CFL1/CFL2	protein
hsa04520	Adherens junction	20	0.710579	2.19061	5.90359e-05	0.000751366	0.000576236	MYL9/ACTN4/ACTN1/MAPK1/MAPK3/CSNK2A2	protein
hsa04530	Tight junction	36	0.596967	2.17921	1.02902e-05	0.000192084	0.000147312	MYL9/ACTN4/ACTN1/ARPC2/TUBA1B/TUBA1A/ARPC1A/HSPA4/ACTR3/ARPC5L/F11R/TUBA1C/ACTR2/MYH9/RAP2C/PPP2R1A/MSN/CDC42/MYH14/MYH10/ARPC3/ARPC1B/RHOA/PPP2R2A	protein
hsa04540	Gap junction	21	0.670147	2.12978	0.000119295	0.00128471	0.000985266	MAPK1/TUBA1B/TUBA1A/MAPK3/TUBB/TUBB6/TUBB2A/TUBB4B	protein
hsa04810	Regulation of actin cytoskeleton	48	0.525947	2.00559	1.98886e-05	0.000309378	0.000237267	MYL9/ACTN4/ITGB5/ACTN1/MAPK1/ARPC2/MAPK3/SCIN/ARPC1A/CFL1/CFL2	protein
hsa05130	Pathogenic Escherichia coli infection	38	0.541286	1.99645	6.24333e-05	0.000760058	0.000582901	MAPK1/ARPC2/TUBA1B/TUBA1A/MAPK3/ARPC1A/TUBB/TUBB6/TUBB2A/TUBB4B/PTPN11/ACTR3/ARPC5L/TUBA1C/SEC24C/GAPDH/ACTR2/MYH9	protein
hsa04510	Focal adhesion	47	0.523069	1.99176	3.1428e-05	0.00046315	0.000355197	MYL9/ACTN4/ITGB5/ACTN1/MAPK1/MAPK3/FLNA/LAMB2/TLN2/CRK/CAV1/LAMA4/LAMC1/RAP1B/ITGAV/GRB2/CAPN2/VCL/MAP2K1	protein
hsa04962	Vasopressin-regulated water reabsorption	17	0.65092	1.98332	0.00157978	0.011342	0.0086984	DYNC1LI2/RAB5A/RAB11B/DYNC1I2/DCTN2/DYNC1H1/NSF/DCTN4/DCTN1/DYNLL1/ARHGDIA/STX4/RAB5C	protein
hsa05140	Leishmaniasis	7	0.835323	1.96014	0.00258976	0.0164803	0.012639	MAPK1/MAPK3/C3	protein
hsa05133	Pertussis	14	0.681115	1.95064	0.00251258	0.016361	0.0125475	MAPK1/MAPK3/CFL1/CFL2/C3	protein
hsa05142	Chagas disease	13	0.676867	1.87085	0.00633414	0.0361951	0.0277586	MAPK1/MAPK3/C3	protein
hsa04144	Endocytosis	57	0.446646	1.79697	0.000147673	0.00153142	0.00117447	ARF4/BIN1/RAB5A/ARPC2/EEA1/ARPC1A/PDCD6IP/SNX6/CLTC/RAB11B/EPS15/VPS29/EHD4/ACTR3/ARPC5L/ARF3/CAV1/HSPA1A/VPS35/SNX1/HSPA8/ACTR2/CAPZA1	protein
hsa05146	Amoebiasis	25	0.533442	1.78686	0.0023259	0.0158842	0.0121819	ACTN4/ACTN1/HSPB1/RAB5A/PRDX1/LAMB2	protein
hsa04360	Axon guidance	22	0.552304	1.7823	0.00250655	0.016361	0.0125475	MYL9/MAPK1/MAPK3/CFL1/CFL2	protein
hsa04270	Vascular smooth muscle contraction	21	0.559753	1.77894	0.00437564	0.0260676	0.0199917	MYL9/MAPK1/MAPK3	protein
hsa04670	Leukocyte transendothelial migration	20	0.573081	1.76672	0.00542245	0.0316309	0.0242583	MYL9/ACTN4/ACTN1/PTPN11/F11R	protein
hsa04611	Platelet activation	25	0.526916	1.765	0.00286784	0.017737	0.0136028	MAPK1/MAPK3/FGB/FGG/TLN2/RAP1B/APBB1IP	protein
hsa00541	Biosynthesis of various nucleotide sugars	5	0.862561	1.74061	0.00812564	0.0434163	0.0332967	UGP2/GMPPB/UGDH	protein
hsa05100	Bacterial invasion of epithelial cells	23	0.518888	1.70669	0.00810214	0.0434163	0.0332967	ARPC2/ARPC1A/CLTC/ACTR3/ARPC5L/CRK/CAV1/ACTR2/VCL/CDC42/SEPTIN2/ARPC3/ARPC1B/RHOA/RHOG	protein
hsa04145	Phagosome	43	0.451387	1.69551	0.00120097	0.00982902	0.00753804	ITGB5/DYNC1LI2/RAB5A/TUBA1B/TUBA1A/EEA1/C3/TUBB/TUBB6/TUBB2A/TUBB4B/DYNC1I2/DYNC1H1	protein
hsa05131	Shigellosis	48	0.380038	1.44919	0.00752134	0.0421195	0.0323022	MYL9/ACTN4/ACTN1/CAPN1/MAPK1/ARPC2/MAPK3/ARPC1A/C3/RRAGB/UBE2V1/PFN1/ACTR3/ARPC5L/TLN2/CRK	protein
hsa05010	Alzheimer disease	119	-0.477079	-1.46074	0.00291394	0.017737	0.0136028	VDAC3/APOE/NDUFA9/VDAC1/NDUFB3/PSMD4/NDUFB4/NDUFA5/NDUFB9/MT-ND4/NDUFS2/NDUFA10/COX7A1/ATP5PB/MT-ATP8/VDAC2/NDUFS1/MT-CO2/MT-ND5/NDUFA2/ATP5F1C/NDUFV1/SDHC/ATP5PO/SDHA/NDUFA8/COX4I1/CYC1/NDUFS3/SDHB/NDUFB10/UQCRC2/COX6C/NDUFS8/ATP5F1B/CYCS/ATP5F1A/ATP5F1D/UQCRC1/UQCRB/UQCRFS1/NDUFA11/COX7A2/PPIF/UQCR10/NDUFAB1/NDUFV2/SLC25A6/HSD17B10/MME/UQCRQ/SLC25A4/SLC25A5/UQCRH	protein
hsa05020	Prion disease	116	-0.484331	-1.48276	0.00124783	0.00982902	0.00753804	NDUFA9/VDAC1/NDUFB3/PSMD4/NDUFB4/NDUFA5/NDUFB9/MT-ND4/NDUFS2/NDUFA10/COX7A1/ATP5PB/MT-ATP8/VDAC2/NDUFS1/MT-CO2/MT-ND5/NDUFA2/ATP5F1C/NDUFV1/SDHC/ATP5PO/SDHA/NDUFA8/COX4I1/CYC1/NDUFS3/SDHB/NDUFB10/UQCRC2/COX6C/NDUFS8/ATP5F1B/CYCS/ATP5F1A/ATP5F1D/UQCRC1/UQCRB/UQCRFS1/NDUFA11/COX7A2/PPIF/UQCR10/NDUFAB1/NDUFV2/SLC25A6/UQCRQ/SLC25A4/SLC25A5/UQCRH	protein
hsa05012	Parkinson disease	119	-0.489145	-1.49768	0.00133757	0.00988574	0.00758154	TRAP1/NDUFA12/NDUFS6/CAMK2D/NDUFS7/NDUFB7/MT-CO1/ATP5PD/VDAC3/MAOA/NDUFA9/VDAC1/NDUFB3/PSMD4/NDUFB4/NDUFA5/NDUFB9/MT-ND4/NDUFS2/NDUFA10/COX7A1/ATP5PB/MT-ATP8/VDAC2/NDUFS1/MT-CO2/MT-ND5/NDUFA2/ATP5F1C/NDUFV1/SDHC/ATP5PO/SDHA/NDUFA8/COX4I1/CYC1/NDUFS3/SDHB/NDUFB10/UQCRC2/COX6C/NDUFS8/ATP5F1B/CYCS/ATP5F1A/ATP5F1D/UQCRC1/HTRA2/UQCRB/UQCRFS1/NDUFA11/COX7A2/PPIF/UQCR10/NDUFAB1/NDUFV2/SLC25A6/UQCRQ/SLC2…	protein
hsa04723	Retrograde endocannabinoid signaling	38	-0.564384	-1.54906	0.00821808	0.0434163	0.0332967	NDUFA12/NDUFS6/NDUFS7/NDUFB7/NDUFA9/NDUFB3/NDUFB4/NDUFA5/NDUFB9/MT-ND4/NDUFS2/NDUFA10/NDUFS1/MT-ND5/NDUFA2/NDUFV1/NDUFA8/NDUFS3/NDUFB10/NDUFS8/NDUFA11/NDUFAB1/NDUFV2/GNG12	protein
hsa05016	Huntington disease	115	-0.507808	-1.55253	0.000249276	0.00249276	0.00191174	NDUFA9/VDAC1/NDUFB3/PSMD4/NDUFB4/NDUFA5/NDUFB9/MT-ND4/NDUFS2/NDUFA10/COX7A1/ATP5PB/MT-ATP8/VDAC2/NDUFS1/MT-CO2/MT-ND5/NDUFA2/ATP5F1C/NDUFV1/SDHC/ATP5PO/SDHA/NDUFA8/COX4I1/CYC1/NDUFS3/SDHB/NDUFB10/UQCRC2/COX6C/NDUFS8/ATP5F1B/CYCS/ATP5F1A/ATP5F1D/TFAM/UQCRC1/UQCRB/SOD2/UQCRFS1/NDUFA11/COX7A2/PPIF/UQCR10/NDUFAB1/NDUFV2/SLC25A6/UQCRQ/SLC25A4/SLC25A5/UQCRH	protein
hsa03010	Ribosome	45	-0.596024	-1.67586	0.00123606	0.00982902	0.00753804	RPL3/RPLP2/RPS16/RPS18/RPS5/RPL27A/RPS12/RPSA/RPS3/RPL9/RACK1/RPLP0/RPS3A/RPS15A/RPS28/RPL12/RPL18/RPL4/RPL13/RPS4X/RPS21/RPL18A/RPL17/RPS8/RPL8/RPL22/RPL27/RPL6/RPL13A/RPL7A/RPL14/RPL10A/RPS24/RPL7/RPL5/RPL36/RPL15/MRPL12	protein
hsa05208	Chemical carcinogenesis - reactive oxygen species	85	-0.5619	-1.68501	4.74074e-05	0.000656378	0.000503387	NDUFA9/VDAC1/NDUFB3/NDUFB4/MGST2/NDUFA5/NDUFB9/MT-ND4/NDUFS2/NDUFA10/COX7A1/ATP5PB/MT-ATP8/VDAC2/NDUFS1/MT-CO2/MT-ND5/NDUFA2/ATP5F1C/NDUFV1/SDHC/ATP5PO/SDHA/NDUFA8/COX4I1/CYC1/NDUFS3/SDHB/NDUFB10/UQCRC2/COX6C/NDUFS8/ATP5F1B/MGST3/ATP5F1A/ATP5F1D/UQCRC1/UQCRB/SOD2/UQCRFS1/NDUFA11/COX7A2/PPIF/UQCR10/NDUFAB1/NDUFV2/SLC25A6/UQCRQ/SLC25A4/SLC25A5/UQCRH	protein
hsa00062	Fatty acid elongation	11	-0.775388	-1.70849	0.00231882	0.0158842	0.0121819	ACOT1/HSD17B12/HADHB/ECHS1/HADH/HADHA/ACAA2	protein
hsa00010	Glycolysis / Gluconeogenesis	32	-0.638546	-1.71026	0.00126373	0.00982902	0.00753804	PCK1/ADH1C/ADH1B/DLD/ALDH7A1/HK1/ALDH1B1/HK2/PCK2/PDHA1/PDHB/DLAT	protein
hsa00410	beta-Alanine metabolism	16	-0.737159	-1.76289	0.00134164	0.00988574	0.00758154	EHHADH/ALDH7A1/ALDH1B1/ACADS/HIBCH/ECHS1/HADHA/ALDH6A1	protein
hsa04260	Cardiac muscle contraction	22	-0.709184	-1.77027	0.000391067	0.00364996	0.00279922	MT-CO1/ATP1A1/COX7A1/MT-CO2/COX4I1/CYC1/UQCRC2/COX6C/UQCRC1/UQCRB/UQCRFS1/COX7A2/UQCR10/UQCRQ/UQCRH	protein
hsa00380	Tryptophan metabolism	17	-0.737566	-1.7806	0.000637323	0.00557658	0.00427677	MAOA/ALDH2/KYAT3/EHHADH/DLD/ALDH7A1/ALDH1B1/DLST/ACAT1/ECHS1/HADH/HADHA/GCDH	protein
hsa00630	Glyoxylate and dicarboxylate metabolism	19	-0.727397	-1.78082	0.000466323	0.00421195	0.00323022	GRHPR/SHMT1/MCEE/SHMT2/GLUL/MMUT/DLD/PCCB/ACO2/MDH2/ACAT1/GCSH/CS/PCCA	protein
hsa04146	Peroxisome	24	-0.70303	-1.78295	0.000303912	0.00293433	0.00225038	ACOX1/ACAA1/PRDX5/HSD17B4/GSTK1/SCP2/EHHADH/CRAT/SOD2/ACSL1/IDH2/ECI2/ECH1/PECR/HMGCL	protein
hsa00650	Butanoate metabolism	11	-0.843063	-1.8576	9.80258e-05	0.00109789	0.00084199	BDH1/EHHADH/ALDH5A1/OXCT1/ACADS/ACAT1/ECHS1/HMGCL/HADH/HADHA	protein
hsa00640	Propanoate metabolism	26	-0.723096	-1.86568	4.92283e-05	0.000656378	0.000503387	ACACA/EHHADH/DLD/DBT/ACADS/BCKDHB/HIBCH/SUCLG2/PCCB/ECHS1/HADHA/SUCLG1/SUCLA2/PCCA/BCKDHA/ALDH6A1	protein
hsa00620	Pyruvate metabolism	32	-0.707493	-1.89493	1.72045e-05	0.000283369	0.000217321	ACACA/ME2/PCK1/ADH1C/ADH1B/DLD/ALDH7A1/FH/ALDH1B1/PC/PCK2/LDHD/PDHA1/PDHB/MDH2/DLAT/ACAT1	protein
hsa01100	Metabolic pathways	358	-0.599849	-1.89966	1e-10	9.32422e-09	7.15091e-09	ACOX1/GOT1/NDUFB3/NDUFB4/COQ7/MGST2/L2HGDH/CKB/NDUFA5/GRHPR/NFS1/AK4/SHMT1/NDUFB9/MT-ND4/NDUFS2/NDUFA10/MCEE/SHMT2/COX7A1/ATP5PB/GPD2/DGAT1/TK2/ACAA1/MT-ATP8/CDIPT/GPAM/NDUFS1/KYAT3/MT-CO2/MT-ND5/HSD17B4/GLUL/LAP3/GSTK1/NDUFA2/DGLUCY/CBR4/GPD1L/ATP5F1C/NDUFV1/MOGS/ACADL/MMUT/ACOT1/SDHC/ATP5PO/PAICS/SDHA/NDUFA8/COX4I1/TM7SF2/NADK2/CYC1/GYS1/NDUFS3/HSD17B8/COQ5/SDHB/NDUFB10/UQCRC2/NNT/PYGM/ATP5ME/C…	protein
hsa00310	Lysine degradation	16	-0.795826	-1.90319	9.38572e-05	0.001095	0.000839775	EHHADH/DLD/ALDH7A1/ALDH1B1/DLST/TMLHE/ACAT1/ECHS1/HADH/HADHA/GCDH	protein
hsa00785	Lipoic acid metabolism	10	-0.892319	-1.91994	3.88029e-06	7.76058e-05	5.95172e-05	DLD/DBT/DLST/BCKDHB/PDHA1/PDHB/DLAT/GCSH/BCKDHA	protein
hsa04932	Non-alcoholic fatty liver disease	45	-0.705651	-1.9841	3.65722e-07	8.53352e-06	6.5445e-06	ADIPOQ/NDUFA12/NDUFS6/NDUFS7/NDUFB7/MT-CO1/NDUFA9/NDUFB3/NDUFB4/NDUFA5/NDUFB9/NDUFS2/NDUFA10/COX7A1/NDUFS1/MT-CO2/NDUFA2/NDUFV1/SDHC/SDHA/NDUFA8/COX4I1/CYC1/NDUFS3/SDHB/NDUFB10/UQCRC2/COX6C/NDUFS8/CYCS/UQCRC1/UQCRB/UQCRFS1/NDUFA11/COX7A2/UQCR10/NDUFAB1/NDUFV2/UQCRQ/UQCRH	protein
hsa00071	Fatty acid degradation	29	-0.769638	-2.01275	2.57638e-07	6.55805e-06	5.02948e-06	CPT2/EHHADH/ADH1C/ADH1B/ACSL1/ACADVL/ALDH7A1/ACADSB/ECI2/HADHB/ALDH1B1/ACADS/ECI1/ACAT1/ECHS1/HADH/HADHA/ACADM/ACAA2/GCDH	protein
hsa01212	Fatty acid metabolism	31	-0.761283	-2.02382	1.43229e-07	4.01041e-06	3.07565e-06	ACAA1/HSD17B4/CBR4/ACADL/HSD17B8/CPT2/ACACA/FASN/SCP2/EHHADH/ACSL1/ACADVL/ACADSB/HSD17B12/HADHB/ACADS/OXSM/ACAT1/ECHS1/HADH/HADHA/ACADM/ACAA2	protein
hsa00190	Oxidative phosphorylation	60	-0.705549	-2.03868	1.51783e-09	6.07133e-08	4.65621e-08	NDUFA9/NDUFB3/NDUFB4/NDUFA5/NDUFB9/MT-ND4/NDUFS2/NDUFA10/COX7A1/ATP5PB/MT-ATP8/NDUFS1/MT-CO2/MT-ND5/NDUFA2/ATP5F1C/NDUFV1/SDHC/ATP5PO/SDHA/NDUFA8/COX4I1/CYC1/NDUFS3/SDHB/NDUFB10/UQCRC2/ATP5ME/COX6C/NDUFS8/ATP5F1B/CYCS/ATP5F1A/ATP5F1D/UQCRC1/UQCRB/UQCRFS1/PPA2/NDUFA11/COX7A2/UQCR10/NDUFAB1/NDUFV2/ATP5MG/UQCRQ/UQCRH	protein
hsa01200	Carbon metabolism	70	-0.698781	-2.05634	2.47171e-10	1.38416e-08	1.06153e-08	MMUT/SDHC/SDHA/SDHB/GPT2/ME2/OGDH/DLD/IDH2/HK1/IDH3A/FH/GLUD1/PC/DLST/IDH3B/ACADS/HK2/IDH3G/HIBCH/PDHA1/PDHB/SUCLG2/PCCB/ACO2/MDH2/DLAT/ACAT1/ECHS1/SUCLG1/SUCLA2/GCSH/CS/PCCA/ALDH6A1	protein
hsa04714	Thermogenesis	71	-0.70013	-2.06017	1.33203e-10	9.32422e-09	7.15091e-09	NDUFA12/NDUFS6/NDUFS7/PNPLA2/NDUFB7/MT-CO1/ATP5PD/NDUFA9/NDUFB3/NDUFB4/NDUFA5/NDUFB9/MT-ND4/NDUFS2/NDUFA10/COX7A1/ATP5PB/MT-ATP8/NDUFS1/MT-CO2/MT-ND5/NDUFA2/ATP5F1C/NDUFV1/SLC25A20/SDHC/ATP5PO/SDHA/NDUFA8/COX4I1/CYC1/NDUFS3/SDHB/NDUFB10/UQCRC2/ATP5ME/CPT2/COX6C/NDUFS8/ATP5F1B/ATP5F1A/ATP5F1D/UQCRC1/UQCRB/UQCRFS1/ACSL1/NDUFA11/COX7A2/UQCR10/NDUFAB1/NDUFV2/ATP5MG/UQCRQ/UQCRH	protein
hsa05415	Diabetic cardiomyopathy	78	-0.69713	-2.0731	1e-10	9.32422e-09	7.15091e-09	NDUFA12/NDUFS6/CAMK2D/NDUFS7/NDUFB7/MT-CO1/ATP5PD/VDAC3/NDUFA9/VDAC1/NDUFB3/NDUFB4/NDUFA5/NDUFB9/MT-ND4/NDUFS2/PDK4/NDUFA10/COX7A1/ATP5PB/MT-ATP8/VDAC2/NDUFS1/MT-CO2/MT-ND5/NDUFA2/ATP5F1C/NDUFV1/SDHC/ATP5PO/SDHA/NDUFA8/COX4I1/PDK2/CYC1/GYS1/NDUFS3/SDHB/NDUFB10/UQCRC2/CPT2/COX6C/NDUFS8/MPC2/ATP5F1B/ATP5F1A/ATP5F1D/UQCRC1/UQCRB/UQCRFS1/NDUFA11/COX7A2/PPIF/UQCR10/NDUFAB1/NDUFV2/SLC25A6/UQCRQ/SLC25A4…	protein
hsa01210	2-Oxocarboxylic acid metabolism	23	-0.823533	-2.07687	7.90891e-08	2.46055e-06	1.88704e-06	GPT2/OGDH/DLD/IDH2/DBT/IDH3A/BCAT2/DLST/IDH3B/IDH3G/BCKDHB/PDHA1/PDHB/ACO2/DLAT/CS/BCKDHA	protein
hsa00020	Citrate cycle (TCA cycle)	27	-0.835099	-2.16257	8.6794e-10	4.05039e-08	3.10631e-08	SDHC/SDHA/SDHB/OGDH/PCK1/DLD/IDH2/IDH3A/FH/PC/DLST/IDH3B/IDH3G/PCK2/PDHA1/PDHB/SUCLG2/ACO2/MDH2/DLAT/SUCLG1/SUCLA2/CS	protein
hsa00280	Valine, leucine and isoleucine degradation	36	-0.833707	-2.27567	1e-10	9.32422e-09	7.15091e-09	EHHADH/IVD/ACAD8/DLD/ALDH7A1/OXCT1/ACADSB/DBT/HIBADH/MCCC1/HADHB/ALDH1B1/BCAT2/HSD17B10/ACADS/BCKDHB/AUH/HIBCH/PCCB/ACAT1/ECHS1/HMGCL/HADH/HADHA/ACADM/MCCC2/ACAA2/PCCA/BCKDHA/ALDH6A1	protein

## Sheet: Fig._2c
Figure 2c
ID	Description	setSize	enrichmentScore	NES	pvalue	p.adjust	qvalue	core_enrichment
HALLMARK_OXIDATIVE_PHOSPHORYLATION	Oxidative phosphorylation	132	0.549571	2.36131	1e-10	1.25e-09	8.68421e-10	NDUFAB1/MGST3/HADHB/ATP6V1E1/DLD/CYB5R3/HADHA/ATP6V1F/ACAT1/ACAA2/OGDH/PDHB/MDH2/ATP6V1H/COX5A/CYC1/ATP6V1G1/GPX4/DLST/DECR1/CPT1A/ECHS1/COX5B/ETFA/ECI1/UQCRFS1/NNT/SLC25A11/CASP7/CYCS/NDUFA8/UQCRH/CS/RETSAT/PRDX3/ATP5MF/DLAT/ATP6V1C1/IMMT/ACO2/PDP1/SUCLA2/ECH1/PMPCA/ATP5PD/SUCLG1/IDH1/GLUD1/ETFB/MTX2/CYB5A/BAX/GRPEL1
HALLMARK_APICAL_JUNCTION	Apical junction	62	0.586341	2.21907	2.96471e-07	2.96471e-06	2.05969e-06	ACTN1/ITGB1/ACTG1/ICAM1/MYH9/PECAM1/MYL9/MYL12B/GNAI2/RRAS/CTNNA1/CNN2/ACTN4/VASP/MSN/CAP1/ARPC2/THY1/TGFBI/ACTB/HADH/MYH10/FLNC/VCAN/RSU1/ZYX/VWF/VCL/NEXN/JUP/PARVA
HALLMARK_ADIPOGENESIS	Adipogenesis	83	0.534732	2.15097	3.55882e-07	2.96569e-06	2.06037e-06	NDUFAB1/DHRS7/MGST3/DLD/ACAA2/MDH2/CYC1/GPX4/CMBL/DECR1/ECHS1/APOE/ALDH2/CS/RETSAT/PRDX3/ESYT1/CAVIN1/DLAT/REEP5/HADH/IMMT/ACO2/TST/PFKL/ECH1/SUCLG1/GBE1/MTCH2/IDH1/ETFB/GRPEL1/SNCG/SQOR/IDH3A/IDH3G
HALLMARK_COMPLEMENT	Complement	60	0.550244	2.06954	1.57536e-05	0.000112526	7.81758e-05	CTSB/CTSS/GNAI2/GNB2/DOCK4/CTSD/CASP7/CASP10/PDGFB/PSMB9/CDH13/LGALS3/HSPA1A/MMP14/PDP1/RHOG/COL4A2/F5/PRCP/CD59/GNB4/CALM1/EHD1/LIPA/LGMN/F2/CSRP1/SERPINB2/LTA4H/TFPI2
HALLMARK_COAGULATION	Coagulation	44	0.573919	2.02112	5.94149e-05	0.000371343	0.000257986	CTSB/ITGB3/PECAM1/HTRA1/PRSS23/CPN1/GSN/GNB2/PDGFB/CRIP2/RAC1/MMP14/ANXA1/MMP1/CAPN2/SPARC/VWF/WDR1/ISCU/ITGA2/LGMN/F2/CSRP1/SERPINB2/LTA4H/TFPI2
HALLMARK_INTERFERON_GAMMA_RESPONSE	Interferon gamma response	46	0.543431	1.93308	0.000133605	0.000668024	0.000464101	ICAM1/B2M/HLA-A/TAPBP/ISOC1/TAP1/RIGI/ISG15/WARS1/CASP7/VAMP5/TRIM25/PSMB9/PML
HALLMARK_EPITHELIAL_MESENCHYMAL_TRANSITION	Epithelial mesenchymal transition	79	0.453566	1.80327	0.000165321	0.000751461	0.000522068	ITGB1/ITGB3/FLNA/MYL9/PLOD1/VIM/HTRA1/PLOD3/COLGALT1/DAB2/ACTA2/NT5E/TNC/LGALS1/ITGAV/CAP2/RHOB/COL1A2/THY1/TGFBI/MMP14/COL4A2/CALD1/CALU/VCAN/PVR/CD44/MMP1/TPM4/SPARC
HALLMARK_INTERFERON_ALPHA_RESPONSE	Interferon alpha response	24	0.516767	1.62492	0.0213856	0.0712853	0.0495245	GBP2/B2M/TAP1/ISG15/WARS1/TRIM25/PSMB9
HALLMARK_MYOGENESIS	Myogenesis	39	0.453959	1.56808	0.01811	0.0646786	0.0449346	ITGB1/MYO1C/MYH9/AK1/TPM3/GSN/PDLIM7/GAA/CDH13/COL4A2/FHL1/EIF4A2/APP/SPARC
HALLMARK_HEDGEHOG_SIGNALING	Hedgehog signaling	8	0.693103	1.559	0.058305	0.153434	0.106596	MYH9/THY1/PML/DPYSL2
HALLMARK_FATTY_ACID_METABOLISM	Fatty acid metabolism	80	0.371412	1.48181	0.0117278	0.0451071	0.0313376	HADHB/DLD/ACAA2/SUCLG2/PDHB/MDH2/DLST/DECR1/CPT1A/ECHS1/ECI1/S100A10/LGALS1/HSD17B4/RETSAT/HMGCL/MAOA/HADH/MIX23/ACO2/SUCLA2/ECH1/RDH11
HALLMARK_KRAS_SIGNALING_UP	Kras signaling up	23	0.469239	1.46499	0.0479437	0.141315	0.0981765	CTSS/PECAM1/ERO1A/ALDH1A3/ADGRL4/AKAP12/JUP/FUCA1/ITGA2
HALLMARK_UV_RESPONSE_DN	Uv response dn	37	0.41148	1.40033	0.048047	0.141315	0.0981765	ANXA4/ATP2B4/ITGB3/RBPMS/DAB2/TGFBR2/CAP2/ANXA2/COL1A2
HALLMARK_XENOBIOTIC_METABOLISM	Xenobiotic metabolism	70	0.348128	1.35077	0.0555209	0.153434	0.106596	DHRS7/SLC12A4/LONP1/BLVRB/COMT/DDAH2/APOE/ALDH2/RETSAT/CYFIP2/MAOA/ACO2/CASP6/PTGR1/ECH1/CNDP2/UPP1/IDH1/CYB5A/HMOX1/JUP/HSD17B2/ATP2A2/DHRS1/VTN/EPHA2/CAT/FBLN1
HALLMARK_MTORC1_SIGNALING	Mtorc1 signaling	124	-0.458346	-1.64135	0.000465729	0.00194054	0.00134816	TCEA1/PITPNB/HMGCS1/HPRT1/GPI/ASNS/ETF1/HK2/ENO1/PSAT1/TPI1/CACYBP/DDX39A/DHCR24/RPA1/EIF2S2/ACACA/PSMD13/CCT6A/TFRC/MTHFD2/IDI1/NUP205/CYP51A1/ABCF2/PSME3/DHFR/UCHL5/RRM2/LDHA/SHMT2/MCM4/PSMG1/MCM2
HALLMARK_MYC_TARGETS_V2	Myc targets v2	31	-0.665897	-1.9323	0.000127133	0.000668024	0.000464101	HSPE1/SORD/SRM/MYBBP1A/FARSA/NPM1/BYSL/MRTO4/NIP7/GRWD1/IPO4/HK2/MPHOSPH10/CBX3/PA2G4/PUS1/NOP2/GNL3/MCM4/DCTPP1/MCM5
HALLMARK_MYC_TARGETS_V1	Myc targets v1	177	-0.606455	-2.23839	1e-10	1.25e-09	8.68421e-10	PSMC6/PSMD1/NPM1/SNRPA/SRSF3/SF3B3/LSM2/SNRPD3/XRCC6/HNRNPU/PABPC4/RPS5/EPRS1/PSMA7/G3BP1/CCT5/SRSF1/RPL18/FBL/H2AZ1/EIF3J/HNRNPD/GSPT1/EIF4H/HNRNPA1/RPL22/TRA2B/HPRT1/TRIM28/UBE2E1/CCT3/AP3S1/PCBP1/ETF1/PSMD7/HNRNPC/CAD/CLNS1A/SNRPB2/PPM1G/SF3A1/EIF4A1/NAP1L1/CCT7/EXOSC7/SSB/EIF1AX/PABPC1/SNRPD1/CBX3/RPL14/KPNB1/PA2G4/PTGES3/RPS2/EIF4G2/EIF3B/SERBP1/EIF2S2/NCBP1/RACK1/HSP90AB1/RPS10/RPS3/RPLP0/B…
HALLMARK_G2M_CHECKPOINT	G2m checkpoint	76	-0.69224	-2.31653	1e-10	1.25e-09	8.68421e-10	HNRNPU/JPT1/TOP1/DKC1/G3BP1/SRSF1/SRSF10/STMN1/H2AZ1/HMGB3/HNRNPD/GSPT1/SMAD3/TRA2B/CUL4A/NUMA1/RBM14/CDC27/ILF3/H2BC12/DDX39A/NUP98/HSPA8/SFPQ/SNRPD1/TOP2A/SMC1A/KPNB1/BUB3/SYNCRIP/PBK/DR1/NCL/MKI67/NUP50/PDS5B/UCK2/MAD2L1/MCM6/KPNA2/MCM5/NASP/SMC4/SMC2/MCM3/MCM2
HALLMARK_E2F_TARGETS	E2f targets	89	-0.720123	-2.46818	1e-10	1.25e-09	8.68421e-10	SRSF1/MSH2/STMN1/H2AZ1/HMGB3/CBX5/HNRNPD/GSPT1/TRA2B/TRIP13/ILF3/NAP1L1/DDX39A/TOP2A/SMC1A/NUDT21/PA2G4/RPA1/TFRC/MTHFD2/NUP205/RBBP7/SYNCRIP/PAICS/LYAR/IPO7/ANP32E/RANBP1/MKI67/RRM2/NCAPD2/PDS5B/DNMT1/CSE1L/MCM4/MAD2L1/MCM6/SSRP1/PCNA/KPNA2/DCTPP1/MCM5/PHF5A/DUT/NASP/RAN/SMC4/MCM7/HMGB2/MCM3/MCM2

## Sheet: Fig._2d
Figure 2d
Obese_EC_Up / Obese_MA_Down			Obese_EC_Up / Obese_MA_Up			Obese_EC_Down / Obese_MA_Up			Obese_EC_Down / Obese_MA_Down
total	elements	Pathway	total	elements	Pathway	total	elements	Pathway	total	elements	Pathway
23	DECR1	OXPHOS/Adipogenesis	8	LAMTOR2		0	---		18	RPL10A
	CHCHD3			DYNC1LI2						RPL7A
	NDUFAB1	OXPHOS/Adipogenesis		MYL9						ACACA
	LONP1			CSTB						RPL15
	OGDH	OXPHOS/Adipogenesis		GPX4	OXPHOS/Adipogenesis					COPS8
	ACAT1	OXPHOS		ACTN1						DUT	E2f targets
	MGST3	OXPHOS/Adipogenesis		FLNA						RPL7
	LETM1			S100A11						RBMX
	HADHB	FA beta-oxidation								RPL13A
	DLST									PAICS
	PPA2									LRPPRC
	DLD	OXPHOS/Adipogenesis								FKBP5
	HLA-A									TFRC	E2f targets
	CYC1									RPL6
	HADHA	FA beta-oxidation								RPS24
	KYAT3									RPL27
	HK1									RPL14	Myc targets v1
	SUCLG2	FA metabolism								SHMT2	Mtorc1 signaling
	MDH2	OXPHOS/Adipogenesis
	GATD3B
	SSBP1
	PDHB
	ACAA2	OXPHOS/Adipogenesis

## Sheet: Fig._3c
Figure 3c
ONTOLOGY	ID	Description	GeneRatio	BgRatio	pvalue	p.adjust	qvalue	geneID	Count	From
BP	GO:0045333	Cellular respiration	83/664	243/18870	2.70132e-59	1.37497e-55	1.19797e-55	ACO2/ATP5F1B/ATP5ME/ATP5PF/CISD1/COA6/COQ9/COX4I1/COX5A/COX5B/COX6B1/COX6C/COX7A2/CS/CYCS/DHTKD1/DLAT/DLD/DLST/ETFA/ETFB/ETFDH/FH/IDH2/IDH3A/IDH3B/IDH3G/IREB2/ISCU/LYRM7/MDH2/ME3/MRPS36/MTLN/NDUFA10/NDUFA11/NDUFA12/NDUFA13/NDUFA5/NDUFA6/NDUFA7/NDUFA9/NDUFAB1/NDUFB10/NDUFB11/NDUFB3/NDUFB6/NDUFB8/NDUFB9/NDUFS1/NDUFS2/NDUFS4/NDUFS6/NDUFS8/NDUFV1/NDUFV2/NIPSNAP2/NNT/OGDH/OXA1L/PDHA1/PDHB/PNPT1/PPIF/S…	83	Protein
BP	GO:0015980	Energy derivation by oxidation of organic compounds	89/664	337/18870	7.73648e-53	1.96894e-49	1.71546e-49	ACADM/ACADVL/ACO2/ATP5F1B/ATP5ME/ATP5PF/CISD1/COA6/COQ9/COX4I1/COX5A/COX5B/COX6B1/COX6C/COX7A2/CS/CYCS/DHTKD1/DLAT/DLD/DLST/ETFA/ETFB/ETFDH/FH/GFPT2/IDH2/IDH3A/IDH3B/IDH3G/IREB2/ISCU/LEP/LYRM7/MDH2/ME3/MRPS36/MTLN/NDUFA10/NDUFA11/NDUFA12/NDUFA13/NDUFA5/NDUFA6/NDUFA7/NDUFA9/NDUFAB1/NDUFB10/NDUFB11/NDUFB3/NDUFB6/NDUFB8/NDUFB9/NDUFS1/NDUFS2/NDUFS4/NDUFS6/NDUFS8/NDUFV1/NDUFV2/NIPSNAP2/NNT/OGDH/OXA1L/…	89	Protein
BP	GO:0009060	Aerobic respiration	70/664	197/18870	2.28052e-51	3.86928e-48	3.37117e-48	ACO2/ATP5F1B/ATP5ME/ATP5PF/COA6/COQ9/COX4I1/COX5A/COX5B/COX6B1/COX6C/COX7A2/CS/CYCS/DHTKD1/DLAT/DLD/DLST/FH/IDH2/IDH3A/IDH3B/IDH3G/IREB2/ISCU/MDH2/ME3/MRPS36/NDUFA10/NDUFA11/NDUFA12/NDUFA13/NDUFA5/NDUFA6/NDUFA7/NDUFA9/NDUFAB1/NDUFB10/NDUFB11/NDUFB3/NDUFB6/NDUFB8/NDUFB9/NDUFS1/NDUFS2/NDUFS4/NDUFS6/NDUFS8/NDUFV1/NDUFV2/NIPSNAP2/NNT/OGDH/OXA1L/PDHA1/PDHB/PPIF/SDHA/SDHB/STOML2/SUCLA2/SUCLG1/SUCLG2/UQ…	70	Protein
BP	GO:0016054	Organic acid catabolic process	72/664	252/18870	2.55757e-45	2.60361e-42	2.26843e-42	AASS/ABCD2/ABHD2/ACAA2/ACACB/ACAD10/ACAD8/ACADM/ACADS/ACADSB/ACADVL/ACAT1/ACOT8/ACOX1/ACSF3/ADIPOQ/ALDH1L1/ALDH1L2/ALDH4A1/ALDH5A1/ALDH6A1/AMACR/AUH/BCAT2/BCKDHA/BCKDHB/CPT2/CRAT/DBT/DCXR/DDAH2/DECR1/DLD/DLST/ECH1/ECHS1/ETFA/ETFB/ETFDH/GCAT/GCDH/GCSH/GLUD1/GLUD2/GLUL/GPT2/HADH/HADHA/HADHB/HIBADH/HIBCH/HMGCL/HSD17B10/HSD17B4/IVD/LDHD/LEP/LPIN1/MCAT/MCCC1/MCCC2/MLYCD/MTHFS/MTLN/PCCA/PCCB/PCK1/SCP2/…	72	Protein
BP	GO:0046395	Carboxylic acid catabolic process	72/664	252/18870	2.55757e-45	2.60361e-42	2.26843e-42	AASS/ABCD2/ABHD2/ACAA2/ACACB/ACAD10/ACAD8/ACADM/ACADS/ACADSB/ACADVL/ACAT1/ACOT8/ACOX1/ACSF3/ADIPOQ/ALDH1L1/ALDH1L2/ALDH4A1/ALDH5A1/ALDH6A1/AMACR/AUH/BCAT2/BCKDHA/BCKDHB/CPT2/CRAT/DBT/DCXR/DDAH2/DECR1/DLD/DLST/ECH1/ECHS1/ETFA/ETFB/ETFDH/GCAT/GCDH/GCSH/GLUD1/GLUD2/GLUL/GPT2/HADH/HADHA/HADHB/HIBADH/HIBCH/HMGCL/HSD17B10/HSD17B4/IVD/LDHD/LEP/LPIN1/MCAT/MCCC1/MCCC2/MLYCD/MTHFS/MTLN/PCCA/PCCB/PCK1/SCP2/…	72	Protein
BP	GO:0044282	Small molecule catabolic process	80/664	375/18870	5.30968e-40	4.50438e-37	3.92451e-37	AASS/ABCD2/ABHD2/ACAA2/ACACB/ACAD10/ACAD8/ACADM/ACADS/ACADSB/ACADVL/ACAT1/ACOT8/ACOX1/ACSF3/ADIPOQ/ALDH1L1/ALDH1L2/ALDH2/ALDH4A1/ALDH5A1/ALDH6A1/AMACR/APOE/AUH/BCAT2/BCKDHA/BCKDHB/CDA/CPT2/CRAT/DBT/DCXR/DDAH2/DECR1/DLD/DLST/ECH1/ECHS1/ENO2/ETFA/ETFB/ETFDH/GCAT/GCDH/GCSH/GLUD1/GLUD2/GLUL/GPT2/HADH/HADHA/HADHB/HIBADH/HIBCH/HK2/HMGCL/HSD17B10/HSD17B4/IVD/LDHD/LEP/LPIN1/MCAT/MCCC1/MCCC2/MLYCD/MTHFS/M…	80	Protein
BP	GO:0022904	Respiratory electron transport chain	46/664	124/18870	5.50134e-35	4.00026e-32	3.48528e-32	COA6/COQ9/COX4I1/COX5A/COX5B/COX6B1/COX6C/COX7A2/CYCS/DLD/ETFA/ETFB/ETFDH/ISCU/NDUFA10/NDUFA12/NDUFA5/NDUFA6/NDUFA7/NDUFA9/NDUFAB1/NDUFB10/NDUFB3/NDUFB6/NDUFB8/NDUFB9/NDUFS1/NDUFS2/NDUFS4/NDUFS6/NDUFS8/NDUFV1/NDUFV2/SCO2/SDHA/SDHB/SLC25A12/SLC25A18/SLC25A22/UQCR10/UQCRB/UQCRC1/UQCRC2/UQCRFS1/UQCRH/UQCRQ	46	Protein
BP	GO:0006119	Oxidative phosphorylation	48/664	148/18870	2.64758e-33	1.68452e-30	1.46766e-30	ATP5F1B/ATP5ME/ATP5PF/COA6/COQ9/COX4I1/COX5A/COX5B/COX6B1/COX6C/COX7A2/CYCS/DLD/ISCU/NDUFA10/NDUFA11/NDUFA12/NDUFA13/NDUFA5/NDUFA6/NDUFA7/NDUFA9/NDUFAB1/NDUFB10/NDUFB11/NDUFB3/NDUFB6/NDUFB8/NDUFB9/NDUFS1/NDUFS2/NDUFS4/NDUFS6/NDUFS8/NDUFV1/NDUFV2/NIPSNAP2/PPIF/SDHA/SDHB/STOML2/UQCR10/UQCRB/UQCRC1/UQCRC2/UQCRFS1/UQCRH/UQCRQ	48	Protein
BP	GO:0022900	Electron transport chain	51/664	176/18870	1.26976e-32	7.1812e-30	6.25672e-30	AKR1B1/ALDH2/ALDH4A1/COA6/COQ9/COX4I1/COX5A/COX5B/COX6B1/COX6C/COX7A2/CYCS/DLD/ETFA/ETFB/ETFDH/FDX2/IDH3B/ISCU/NDUFA10/NDUFA12/NDUFA5/NDUFA6/NDUFA7/NDUFA9/NDUFAB1/NDUFB10/NDUFB3/NDUFB6/NDUFB8/NDUFB9/NDUFS1/NDUFS2/NDUFS4/NDUFS6/NDUFS8/NDUFV1/NDUFV2/SCO2/SDHA/SDHB/SLC25A12/SLC25A18/SLC25A22/UQCR10/UQCRB/UQCRC1/UQCRC2/UQCRFS1/UQCRH/UQCRQ	51	Protein
BP	GO:0006163	Purine nucleotide metabolic process	78/664	463/18870	1.73084e-31	8.80996e-29	7.67581e-29	AASS/ACACB/ACAT1/ACOT2/ACOT8/ACOT9/ACSF2/ACSF3/ACSL1/ACSS1/ADCY3/AK2/AK3/ALDH1L1/ALDH1L2/AMPD3/ATP5F1B/ATP5ME/ATP5PF/DCXR/DLAT/DLD/DLST/GCDH/GPAM/HSD17B4/IDH2/MCCC2/MDH2/MLYCD/MMUT/NAMPT/NDUFA10/NDUFA11/NDUFA12/NDUFA13/NDUFA5/NDUFA6/NDUFA7/NDUFA9/NDUFAB1/NDUFB10/NDUFB11/NDUFB3/NDUFB6/NDUFB8/NDUFB9/NDUFS1/NDUFS2/NDUFS4/NDUFS6/NDUFS8/NDUFV1/NDUFV2/NME3/NNT/NPR1/OGDH/PC/PDE1A/PDE8A/PDHA1/PDHB/PDHX/P…	78	Protein
BP	GO:0072521	Purine-containing compound metabolic process	80/664	493/18870	4.05754e-31	1.87753e-28	1.63583e-28	AASS/ACACB/ACAT1/ACOT2/ACOT8/ACOT9/ACSF2/ACSF3/ACSL1/ACSS1/ADCY3/AK2/AK3/ALDH1L1/ALDH1L2/AMPD3/ATP5F1B/ATP5ME/ATP5PF/DCXR/DLAT/DLD/DLST/GCDH/GPAM/HSD17B4/IDH2/KDM1A/MCCC2/MDH2/MLYCD/MMUT/NAMPT/NDUFA10/NDUFA11/NDUFA12/NDUFA13/NDUFA5/NDUFA6/NDUFA7/NDUFA9/NDUFAB1/NDUFB10/NDUFB11/NDUFB3/NDUFB6/NDUFB8/NDUFB9/NDUFS1/NDUFS2/NDUFS4/NDUFS6/NDUFS8/NDUFV1/NDUFV2/NME3/NNT/NPR1/OGDH/PC/PDE1A/PDE8A/PDHA1/PDHB/…	80	Protein
BP	GO:0042773	Atp synthesis coupled electron transport	39/664	102/18870	2.02966e-30	7.94691e-28	6.92386e-28	COA6/COQ9/COX4I1/COX5A/COX5B/COX6B1/COX6C/COX7A2/CYCS/DLD/ISCU/NDUFA10/NDUFA12/NDUFA5/NDUFA6/NDUFA7/NDUFA9/NDUFAB1/NDUFB10/NDUFB3/NDUFB6/NDUFB8/NDUFB9/NDUFS1/NDUFS2/NDUFS4/NDUFS6/NDUFS8/NDUFV1/NDUFV2/SDHA/SDHB/UQCR10/UQCRB/UQCRC1/UQCRC2/UQCRFS1/UQCRH/UQCRQ	39	Protein
BP	GO:0042775	Mitochondrial atp synthesis coupled electron transport	39/664	102/18870	2.02966e-30	7.94691e-28	6.92386e-28	COA6/COQ9/COX4I1/COX5A/COX5B/COX6B1/COX6C/COX7A2/CYCS/DLD/ISCU/NDUFA10/NDUFA12/NDUFA5/NDUFA6/NDUFA7/NDUFA9/NDUFAB1/NDUFB10/NDUFB3/NDUFB6/NDUFB8/NDUFB9/NDUFS1/NDUFS2/NDUFS4/NDUFS6/NDUFS8/NDUFV1/NDUFV2/SDHA/SDHB/UQCR10/UQCRB/UQCRC1/UQCRC2/UQCRFS1/UQCRH/UQCRQ	39	Protein
BP	GO:0009062	Fatty acid catabolic process	39/664	106/18870	1.15298e-29	4.1919e-27	3.65225e-27	ABCD2/ABHD2/ACAA2/ACACB/ACAD10/ACADM/ACADS/ACADVL/ACAT1/ACOT8/ACOX1/ADIPOQ/ALDH1L2/AMACR/AUH/CPT2/CRAT/DECR1/ECH1/ECHS1/ETFA/ETFB/ETFDH/GCDH/HADH/HADHA/HADHB/HSD17B10/HSD17B4/IVD/LEP/LPIN1/MCAT/MLYCD/MTLN/PCCA/PCCB/PCK1/SCP2	39	Protein
BP	GO:0019646	Aerobic electron transport chain	37/664	94/18870	1.82675e-29	5.95016e-27	5.18416e-27	COQ9/COX4I1/COX5A/COX5B/COX6B1/COX6C/COX7A2/CYCS/DLD/ISCU/NDUFA10/NDUFA5/NDUFA6/NDUFA7/NDUFA9/NDUFAB1/NDUFB10/NDUFB3/NDUFB6/NDUFB8/NDUFB9/NDUFS1/NDUFS2/NDUFS4/NDUFS6/NDUFS8/NDUFV1/NDUFV2/SDHA/SDHB/UQCR10/UQCRB/UQCRC1/UQCRC2/UQCRFS1/UQCRH/UQCRQ	37	Protein
BP	GO:0006635	Fatty acid beta-oxidation	34/664	76/18870	1.87038e-29	5.95016e-27	5.18416e-27	ABCD2/ACAA2/ACACB/ACAD10/ACADM/ACADS/ACADVL/ACAT1/ACOT8/ACOX1/ADIPOQ/ALDH1L2/AMACR/AUH/CPT2/CRAT/DECR1/ECH1/ECHS1/ETFA/ETFB/ETFDH/GCDH/HADH/HADHA/HADHB/HSD17B10/HSD17B4/IVD/LEP/MCAT/MLYCD/MTLN/SCP2	34	Protein
BP	GO:0072329	Monocarboxylic acid catabolic process	42/664	131/18870	4.85459e-29	1.39958e-26	1.2194e-26	ABCD2/ABHD2/ACAA2/ACACB/ACAD10/ACADM/ACADS/ACADVL/ACAT1/ACOT8/ACOX1/ADIPOQ/ALDH1L2/AMACR/AUH/CPT2/CRAT/DCXR/DECR1/ECH1/ECHS1/ETFA/ETFB/ETFDH/GCDH/HADH/HADHA/HADHB/HSD17B10/HSD17B4/IVD/LDHD/LEP/LPIN1/MCAT/MLYCD/MTLN/PCCA/PCCB/PCK1/SCP2/SLC16A3	42	Protein
BP	GO:0019693	Ribose phosphate metabolic process	69/664	393/18870	4.94938e-29	1.39958e-26	1.2194e-26	AASS/ACACB/ACAT1/ACOT2/ACOT8/ACOT9/ACSF2/ACSF3/ACSL1/ACSS1/ADCY3/AK2/AK3/AMPD3/ATP5F1B/ATP5ME/ATP5PF/CDA/DLAT/DLD/DLST/GCDH/GPAM/HSD17B4/MCCC2/MLYCD/MMUT/NDUFA10/NDUFA11/NDUFA12/NDUFA13/NDUFA5/NDUFA6/NDUFA7/NDUFA9/NDUFAB1/NDUFB10/NDUFB11/NDUFB3/NDUFB6/NDUFB8/NDUFB9/NDUFS1/NDUFS2/NDUFS4/NDUFS6/NDUFS8/NDUFV1/NDUFV2/NME3/NPR1/OGDH/PDE1A/PDE8A/PDHA1/PDHB/PDHX/PDK1/PRPS1/PRPS2/SDHA/SDHB/SLC25A1/STOML2…	69	Protein
BP	GO:0009165	Nucleotide biosynthetic process	59/664	295/18870	4.85324e-28	1.30016e-25	1.13278e-25	ACACB/ACAT1/ACSF3/ACSL1/ACSS1/ADCY3/AK2/AK3/AMPD3/ATP5F1B/ATP5ME/ATP5PF/CDA/CMPK2/DLAT/DLD/DUT/GCDH/MLYCD/MMUT/NAMPT/NDUFA10/NDUFA11/NDUFA12/NDUFA13/NDUFA5/NDUFA6/NDUFA7/NDUFA9/NDUFAB1/NDUFB10/NDUFB11/NDUFB3/NDUFB6/NDUFB8/NDUFB9/NDUFS1/NDUFS2/NDUFS4/NDUFS6/NDUFS8/NDUFV1/NDUFV2/NME3/NPR1/PDHA1/PDHB/PDHX/PDK1/PRPS1/PRPS2/SDHA/SDHB/SHMT1/SLC25A1/SLC4A7/STOML2/TK2/UPP1	59	Protein
BP	GO:0009259	Ribonucleotide metabolic process	67/664	385/18870	5.6712e-28	1.42766e-25	1.24387e-25	AASS/ACACB/ACAT1/ACOT2/ACOT8/ACOT9/ACSF2/ACSF3/ACSL1/ACSS1/ADCY3/AK2/AK3/AMPD3/ATP5F1B/ATP5ME/ATP5PF/CDA/DLAT/DLD/DLST/GCDH/GPAM/HSD17B4/MCCC2/MLYCD/MMUT/NDUFA10/NDUFA11/NDUFA12/NDUFA13/NDUFA5/NDUFA6/NDUFA7/NDUFA9/NDUFAB1/NDUFB10/NDUFB11/NDUFB3/NDUFB6/NDUFB8/NDUFB9/NDUFS1/NDUFS2/NDUFS4/NDUFS6/NDUFS8/NDUFV1/NDUFV2/NME3/NPR1/OGDH/PDE1A/PDE8A/PDHA1/PDHB/PDHX/PDK1/SDHA/SDHB/SLC25A1/STOML2/SUCLA2/SUCL…	67	Protein
BP	GO:0046390	Ribose phosphate biosynthetic process	53/664	235/18870	5.89017e-28	1.42766e-25	1.24387e-25	ACACB/ACAT1/ACSF3/ACSL1/ACSS1/ADCY3/AK2/AK3/AMPD3/ATP5F1B/ATP5ME/ATP5PF/CDA/DLAT/DLD/GCDH/MLYCD/MMUT/NDUFA10/NDUFA11/NDUFA12/NDUFA13/NDUFA5/NDUFA6/NDUFA7/NDUFA9/NDUFAB1/NDUFB10/NDUFB11/NDUFB3/NDUFB6/NDUFB8/NDUFB9/NDUFS1/NDUFS2/NDUFS4/NDUFS6/NDUFS8/NDUFV1/NDUFV2/NME3/NPR1/PDHA1/PDHB/PDHX/PDK1/PRPS1/PRPS2/SDHA/SDHB/SLC25A1/STOML2/UPP1	53	Protein
BP	GO:1901293	Nucleoside phosphate biosynthetic process	59/664	297/18870	7.08856e-28	1.64004e-25	1.4289e-25	ACACB/ACAT1/ACSF3/ACSL1/ACSS1/ADCY3/AK2/AK3/AMPD3/ATP5F1B/ATP5ME/ATP5PF/CDA/CMPK2/DLAT/DLD/DUT/GCDH/MLYCD/MMUT/NAMPT/NDUFA10/NDUFA11/NDUFA12/NDUFA13/NDUFA5/NDUFA6/NDUFA7/NDUFA9/NDUFAB1/NDUFB10/NDUFB11/NDUFB3/NDUFB6/NDUFB8/NDUFB9/NDUFS1/NDUFS2/NDUFS4/NDUFS6/NDUFS8/NDUFV1/NDUFV2/NME3/NPR1/PDHA1/PDHB/PDHX/PDK1/PRPS1/PRPS2/SDHA/SDHB/SHMT1/SLC25A1/SLC4A7/STOML2/TK2/UPP1	59	Protein
BP	GO:0009150	Purine ribonucleotide metabolic process	65/664	365/18870	9.41433e-28	2.08343e-25	1.81522e-25	AASS/ACACB/ACAT1/ACOT2/ACOT8/ACOT9/ACSF2/ACSF3/ACSL1/ACSS1/ADCY3/AK2/AK3/AMPD3/ATP5F1B/ATP5ME/ATP5PF/DLAT/DLD/DLST/GCDH/GPAM/HSD17B4/MCCC2/MLYCD/MMUT/NDUFA10/NDUFA11/NDUFA12/NDUFA13/NDUFA5/NDUFA6/NDUFA7/NDUFA9/NDUFAB1/NDUFB10/NDUFB11/NDUFB3/NDUFB6/NDUFB8/NDUFB9/NDUFS1/NDUFS2/NDUFS4/NDUFS6/NDUFS8/NDUFV1/NDUFV2/NME3/NPR1/OGDH/PDE1A/PDE8A/PDHA1/PDHB/PDHX/PDK1/SDHA/SDHB/SLC25A1/STOML2/SUCLA2/SUCLG1/S…	65	Protein
BP	GO:0032543	Mitochondrial translation	40/664	130/18870	6.22261e-27	1.31971e-24	1.14982e-24	C1QBP/CHCHD1/COA3/DAP3/DARS2/GFM1/IARS2/LARS2/MRPL1/MRPL11/MRPL13/MRPL15/MRPL19/MRPL22/MRPL23/MRPL24/MRPL27/MRPL3/MRPL32/MRPL39/MRPL40/MRPL45/MRPL47/MRPL53/MRPS14/MRPS18A/MRPS18B/MRPS2/MRPS24/MRPS26/MRPS30/MRPS7/MRPS9/MTIF3/NDUFA7/PTCD3/TACO1/TSFM/TUFM/WARS2	40	Protein
BP	GO:0009260	Ribonucleotide biosynthetic process	51/664	228/18870	9.29488e-27	1.89244e-24	1.64881e-24	ACACB/ACAT1/ACSF3/ACSL1/ACSS1/ADCY3/AK2/AK3/AMPD3/ATP5F1B/ATP5ME/ATP5PF/CDA/DLAT/DLD/GCDH/MLYCD/MMUT/NDUFA10/NDUFA11/NDUFA12/NDUFA13/NDUFA5/NDUFA6/NDUFA7/NDUFA9/NDUFAB1/NDUFB10/NDUFB11/NDUFB3/NDUFB6/NDUFB8/NDUFB9/NDUFS1/NDUFS2/NDUFS4/NDUFS6/NDUFS8/NDUFV1/NDUFV2/NME3/NPR1/PDHA1/PDHB/PDHX/PDK1/SDHA/SDHB/SLC25A1/STOML2/UPP1	51	Protein
BP	GO:0009152	Purine ribonucleotide biosynthetic process	49/664	213/18870	2.44985e-26	4.79606e-24	4.17864e-24	ACACB/ACAT1/ACSF3/ACSL1/ACSS1/ADCY3/AK2/AK3/AMPD3/ATP5F1B/ATP5ME/ATP5PF/DLAT/DLD/GCDH/MLYCD/MMUT/NDUFA10/NDUFA11/NDUFA12/NDUFA13/NDUFA5/NDUFA6/NDUFA7/NDUFA9/NDUFAB1/NDUFB10/NDUFB11/NDUFB3/NDUFB6/NDUFB8/NDUFB9/NDUFS1/NDUFS2/NDUFS4/NDUFS6/NDUFS8/NDUFV1/NDUFV2/NME3/NPR1/PDHA1/PDHB/PDHX/PDK1/SDHA/SDHB/SLC25A1/STOML2	49	Protein
BP	GO:0009081	Branched-chain amino acid metabolic process	21/664	27/18870	5.31391e-26	9.95167e-24	8.67054e-24	ACAD8/ACADSB/ACAT1/ALDH6A1/AUH/BCAT1/BCAT2/BCKDHA/BCKDHB/DBT/DLD/ECHS1/HIBADH/HIBCH/HMGCL/HSD17B10/IVD/MCCC1/MCCC2/PCCA/PCCB	21	Protein
BP	GO:0072522	Purine-containing compound biosynthetic process	54/664	267/18870	5.47439e-26	9.95167e-24	8.67054e-24	ACACB/ACAT1/ACSF3/ACSL1/ACSS1/ADCY3/AK2/AK3/AMPD3/ATP5F1B/ATP5ME/ATP5PF/DLAT/DLD/GCDH/MLYCD/MMUT/NAMPT/NDUFA10/NDUFA11/NDUFA12/NDUFA13/NDUFA5/NDUFA6/NDUFA7/NDUFA9/NDUFAB1/NDUFB10/NDUFB11/NDUFB3/NDUFB6/NDUFB8/NDUFB9/NDUFS1/NDUFS2/NDUFS4/NDUFS6/NDUFS8/NDUFV1/NDUFV2/NME3/NPR1/PDHA1/PDHB/PDHX/PDK1/PRPS1/PRPS2/SDHA/SDHB/SHMT1/SLC25A1/SLC4A7/STOML2	54	Protein
BP	GO:0006164	Purine nucleotide biosynthetic process	53/664	258/18870	7.2265e-26	1.26838e-23	1.10509e-23	ACACB/ACAT1/ACSF3/ACSL1/ACSS1/ADCY3/AK2/AK3/AMPD3/ATP5F1B/ATP5ME/ATP5PF/DLAT/DLD/GCDH/MLYCD/MMUT/NAMPT/NDUFA10/NDUFA11/NDUFA12/NDUFA13/NDUFA5/NDUFA6/NDUFA7/NDUFA9/NDUFAB1/NDUFB10/NDUFB11/NDUFB3/NDUFB6/NDUFB8/NDUFB9/NDUFS1/NDUFS2/NDUFS4/NDUFS6/NDUFS8/NDUFV1/NDUFV2/NME3/NPR1/PDHA1/PDHB/PDHX/PDK1/PRPS1/PRPS2/SDHA/SDHB/SLC25A1/SLC4A7/STOML2	53	Protein
BP	GO:0140053	Mitochondrial gene expression	43/664	163/18870	7.88067e-26	1.33709e-23	1.16496e-23	C1QBP/CHCHD1/COA3/DAP3/DARS2/ELAC2/GFM1/HSD17B10/IARS2/LARS2/MRPL1/MRPL11/MRPL13/MRPL15/MRPL19/MRPL22/MRPL23/MRPL24/MRPL27/MRPL3/MRPL32/MRPL39/MRPL40/MRPL45/MRPL47/MRPL53/MRPS14/MRPS18A/MRPS18B/MRPS2/MRPS24/MRPS26/MRPS30/MRPS7/MRPS9/MTIF3/NDUFA7/PNPT1/PTCD3/TACO1/TSFM/TUFM/WARS2	43	Protein
BP	GO:0033108	Mitochondrial respiratory chain complex assembly	35/664	101/18870	1.04437e-25	1.71479e-23	1.49403e-23	AIFM1/BCS1L/COA3/COX20/ECSIT/LYRM2/LYRM7/NDUFA10/NDUFA11/NDUFA12/NDUFA13/NDUFA5/NDUFA6/NDUFA9/NDUFAB1/NDUFAF2/NDUFAF5/NDUFB10/NDUFB11/NDUFB3/NDUFB6/NDUFB8/NDUFB9/NDUFS1/NDUFS2/NDUFS4/NDUFS8/NUBPL/OMA1/OXA1L/SCO2/TACO1/TMEM126A/UQCC4/UQCRFS1	35	Protein
BP	GO:0006631	Fatty acid metabolic process	65/664	401/18870	2.36908e-25	3.76833e-23	3.28321e-23	ABCD2/ABHD2/ACAA2/ACACB/ACAD10/ACADM/ACADS/ACADSB/ACADVL/ACAT1/ACOT2/ACOT8/ACOX1/ACSF2/ACSF3/ACSL1/ACSS1/ADIPOQ/AKR1B1/ALDH1L2/AMACR/AUH/CBR4/CD36/CPT2/CRAT/CYP2U1/DECR1/ECH1/ECHS1/ETFA/ETFB/ETFDH/FASN/GCDH/GPAM/HADH/HADHA/HADHB/HSD17B10/HSD17B4/HSD17B8/IVD/LEP/LPIN1/MCAT/MGLL/MID1IP1/MLYCD/MMUT/MTLN/NDUFAB1/PCCA/PCCB/PCK1/PDK1/PECR/PNPLA8/PTGES2/SCD/SCP2/THNSL2/TNFRSF1A/TNXB/TREX1	65	Protein
BP	GO:0006099	Tricarboxylic acid cycle	22/664	33/18870	1.00421e-24	1.54892e-22	1.34952e-22	ACO2/CS/DHTKD1/DLAT/DLST/FH/IDH2/IDH3A/IDH3B/IDH3G/IREB2/MDH2/MRPS36/NNT/OGDH/PDHA1/PDHB/SDHA/SDHB/SUCLA2/SUCLG1/SUCLG2	22	Protein
BP	GO:0009083	Branched-chain amino acid catabolic process	18/664	21/18870	6.58488e-24	9.85795e-22	8.58888e-22	ACAD8/ACADSB/ACAT1/ALDH6A1/AUH/BCAT2/BCKDHA/BCKDHB/DBT/DLD/ECHS1/HIBADH/HIBCH/HMGCL/HSD17B10/IVD/MCCC1/MCCC2	18	Protein
BP	GO:0019395	Fatty acid oxidation	34/664	107/18870	1.37172e-23	1.99487e-21	1.73806e-21	ABCD2/ACAA2/ACACB/ACAD10/ACADM/ACADS/ACADVL/ACAT1/ACOT8/ACOX1/ADIPOQ/ALDH1L2/AMACR/AUH/CPT2/CRAT/DECR1/ECH1/ECHS1/ETFA/ETFB/ETFDH/GCDH/HADH/HADHA/HADHB/HSD17B10/HSD17B4/IVD/LEP/MCAT/MLYCD/MTLN/SCP2	34	Protein
BP	GO:0042776	Proton motive force-driven mitochondrial atp synthesis	28/664	67/18870	1.83653e-23	2.59664e-21	2.26236e-21	ATP5F1B/ATP5ME/ATP5PF/NDUFA10/NDUFA11/NDUFA12/NDUFA13/NDUFA5/NDUFA6/NDUFA7/NDUFA9/NDUFAB1/NDUFB10/NDUFB11/NDUFB3/NDUFB6/NDUFB8/NDUFB9/NDUFS1/NDUFS2/NDUFS4/NDUFS6/NDUFS8/NDUFV1/NDUFV2/SDHA/SDHB/STOML2	28	Protein
BP	GO:0034440	Lipid oxidation	34/664	114/18870	1.40941e-22	1.93889e-20	1.68928e-20	ABCD2/ACAA2/ACACB/ACAD10/ACADM/ACADS/ACADVL/ACAT1/ACOT8/ACOX1/ADIPOQ/ALDH1L2/AMACR/AUH/CPT2/CRAT/DECR1/ECH1/ECHS1/ETFA/ETFB/ETFDH/GCDH/HADH/HADHA/HADHB/HSD17B10/HSD17B4/IVD/LEP/MCAT/MLYCD/MTLN/SCP2	34	Protein
BP	GO:0010257	Nadh dehydrogenase complex assembly	26/664	60/18870	2.25613e-22	2.94454e-20	2.56547e-20	BCS1L/ECSIT/LYRM2/NDUFA10/NDUFA11/NDUFA12/NDUFA13/NDUFA5/NDUFA6/NDUFA9/NDUFAB1/NDUFAF2/NDUFAF5/NDUFB10/NDUFB11/NDUFB3/NDUFB6/NDUFB8/NDUFB9/NDUFS1/NDUFS2/NDUFS4/NDUFS8/NUBPL/OXA1L/TMEM126A	26	Protein
BP	GO:0032981	Mitochondrial respiratory chain complex i assembly	26/664	60/18870	2.25613e-22	2.94454e-20	2.56547e-20	BCS1L/ECSIT/LYRM2/NDUFA10/NDUFA11/NDUFA12/NDUFA13/NDUFA5/NDUFA6/NDUFA9/NDUFAB1/NDUFAF2/NDUFAF5/NDUFB10/NDUFB11/NDUFB3/NDUFB6/NDUFB8/NDUFB9/NDUFS1/NDUFS2/NDUFS4/NDUFS8/NUBPL/OXA1L/TMEM126A	26	Protein
BP	GO:0044242	Cellular lipid catabolic process	45/664	223/18870	8.66471e-22	1.10258e-19	9.60642e-20	ABCD2/ABHD2/ACAA2/ACACB/ACAD10/ACADM/ACADS/ACADVL/ACAT1/ACOT8/ACOX1/ADIPOQ/ALDH1L2/AMACR/AUH/CPS1/CPT2/CRAT/DECR1/ECH1/ECHS1/ETFA/ETFB/ETFDH/GCDH/HADH/HADHA/HADHB/HSD17B10/HSD17B4/IVD/LEP/LPIN1/MCAT/MGLL/MLYCD/MTLN/PCCA/PCCB/PCK1/PLD1/PNPLA2/PNPLA8/SCARB1/SCP2	45	Protein
BP	GO:0015986	Proton motive force-driven atp synthesis	28/664	76/18870	1.15769e-21	1.43723e-19	1.2522e-19	ATP5F1B/ATP5ME/ATP5PF/NDUFA10/NDUFA11/NDUFA12/NDUFA13/NDUFA5/NDUFA6/NDUFA7/NDUFA9/NDUFAB1/NDUFB10/NDUFB11/NDUFB3/NDUFB6/NDUFB8/NDUFB9/NDUFS1/NDUFS2/NDUFS4/NDUFS6/NDUFS8/NDUFV1/NDUFV2/SDHA/SDHB/STOML2	28	Protein
BP	GO:0009063	Amino acid catabolic process	33/664	113/18870	1.25285e-21	1.51833e-19	1.32287e-19	AASS/ACAD8/ACADSB/ACAT1/ALDH4A1/ALDH5A1/ALDH6A1/AUH/BCAT2/BCKDHA/BCKDHB/DBT/DDAH2/DLD/DLST/ECHS1/ETFA/ETFB/GCAT/GCSH/GLUD1/GLUD2/GLUL/GPT2/HIBADH/HIBCH/HMGCL/HSD17B10/IVD/MCCC1/MCCC2/SHMT1/THNSL2	33	Protein
BP	GO:0016042	Lipid catabolic process	54/664	334/18870	3.71894e-21	4.40219e-19	3.83547e-19	ABCD2/ABHD15/ABHD2/ACAA2/ACACB/ACAD10/ACADM/ACADS/ACADVL/ACAT1/ACOT8/ACOX1/ADIPOQ/ALDH1L2/AMACR/APOE/AUH/CPS1/CPT2/CRAT/DECR1/ECH1/ECHS1/ETFA/ETFB/ETFDH/GCDH/HADH/HADHA/HADHB/HINT2/HSD17B10/HSD17B4/IVD/LEP/LPIN1/MCAT/MGLL/MLYCD/MTLN/OXCT1/PCCA/PCCB/PCK1/PDE3B/PLA2G2A/PLD1/PLIN1/PNPLA2/PNPLA8/RARRES2/SCARB1/SCP2/TBL1XR1	54	Protein
BP	GO:0006520	Amino acid metabolic process	49/664	291/18870	4.57731e-20	5.29512e-18	4.61345e-18	AASS/ACAD8/ACADSB/ACAT1/ALDH4A1/ALDH5A1/ALDH6A1/AUH/BCAT1/BCAT2/BCKDHA/BCKDHB/BPHL/CPS1/DARS2/DBT/DDAH2/DGLUCY/DLD/DLST/ECHS1/ETFA/ETFB/GCAT/GCDH/GCSH/GFPT2/GLUD1/GLUD2/GLUL/GPT2/HIBADH/HIBCH/HMGCL/HSD17B10/IARS2/IVD/LARS2/MCCC1/MCCC2/MMUT/MTHFS/PCCA/PCCB/PLOD2/SHMT1/SLC25A12/THNSL2/WARS2	49	Protein
BP	GO:0009142	Nucleoside triphosphate biosynthetic process	31/664	127/18870	6.71241e-18	7.59248e-16	6.61506e-16	AK3/ATP5F1B/ATP5ME/ATP5PF/CMPK2/NDUFA10/NDUFA11/NDUFA12/NDUFA13/NDUFA5/NDUFA6/NDUFA7/NDUFA9/NDUFAB1/NDUFB10/NDUFB11/NDUFB3/NDUFB6/NDUFB8/NDUFB9/NDUFS1/NDUFS2/NDUFS4/NDUFS6/NDUFS8/NDUFV1/NDUFV2/NME3/SDHA/SDHB/STOML2	31	Protein
BP	GO:0006120	Mitochondrial electron transport, nadh to ubiquinone	21/664	51/18870	9.28596e-18	1.01333e-15	8.82878e-16	COQ9/DLD/ISCU/NDUFA10/NDUFA5/NDUFA6/NDUFA7/NDUFA9/NDUFAB1/NDUFB10/NDUFB3/NDUFB6/NDUFB8/NDUFB9/NDUFS1/NDUFS2/NDUFS4/NDUFS6/NDUFS8/NDUFV1/NDUFV2	21	Protein
BP	GO:0006754	Atp biosynthetic process	28/664	102/18870	9.35687e-18	1.01333e-15	8.82878e-16	ATP5F1B/ATP5ME/ATP5PF/NDUFA10/NDUFA11/NDUFA12/NDUFA13/NDUFA5/NDUFA6/NDUFA7/NDUFA9/NDUFAB1/NDUFB10/NDUFB11/NDUFB3/NDUFB6/NDUFB8/NDUFB9/NDUFS1/NDUFS2/NDUFS4/NDUFS6/NDUFS8/NDUFV1/NDUFV2/SDHA/SDHB/STOML2	28	Protein
BP	GO:0009206	Purine ribonucleoside triphosphate biosynthetic process	29/664	113/18870	1.81183e-17	1.85606e-15	1.61712e-15	ATP5F1B/ATP5ME/ATP5PF/NDUFA10/NDUFA11/NDUFA12/NDUFA13/NDUFA5/NDUFA6/NDUFA7/NDUFA9/NDUFAB1/NDUFB10/NDUFB11/NDUFB3/NDUFB6/NDUFB8/NDUFB9/NDUFS1/NDUFS2/NDUFS4/NDUFS6/NDUFS8/NDUFV1/NDUFV2/NME3/SDHA/SDHB/STOML2	29	Protein
BP	GO:0006637	Acyl-coa metabolic process	27/664	96/18870	1.82324e-17	1.85606e-15	1.61712e-15	AASS/ACACB/ACAT1/ACOT2/ACOT8/ACOT9/ACSF2/ACSF3/ACSL1/ACSS1/DLAT/DLD/DLST/GCDH/GPAM/HSD17B4/MLYCD/MMUT/OGDH/PDHA1/PDHB/PDHX/PDK1/SLC25A1/SUCLA2/SUCLG1/SUCLG2	27	Protein
BP	GO:0035383	Thioester metabolic process	27/664	96/18870	1.82324e-17	1.85606e-15	1.61712e-15	AASS/ACACB/ACAT1/ACOT2/ACOT8/ACOT9/ACSF2/ACSF3/ACSL1/ACSS1/DLAT/DLD/DLST/GCDH/GPAM/HSD17B4/MLYCD/MMUT/OGDH/PDHA1/PDHB/PDHX/PDK1/SLC25A1/SUCLA2/SUCLG1/SUCLG2	27	Protein
BP	GO:0009145	Purine nucleoside triphosphate biosynthetic process	29/664	114/18870	2.35074e-17	2.34613e-15	2.0441e-15	ATP5F1B/ATP5ME/ATP5PF/NDUFA10/NDUFA11/NDUFA12/NDUFA13/NDUFA5/NDUFA6/NDUFA7/NDUFA9/NDUFAB1/NDUFB10/NDUFB11/NDUFB3/NDUFB6/NDUFB8/NDUFB9/NDUFS1/NDUFS2/NDUFS4/NDUFS6/NDUFS8/NDUFV1/NDUFV2/NME3/SDHA/SDHB/STOML2	29	Protein
BP	GO:0006790	Sulfur compound metabolic process	47/664	317/18870	5.1915e-17	5.08168e-15	4.42749e-15	AASS/ABCB7/ACACB/ACAT1/ACOT2/ACOT8/ACOT9/ACSF2/ACSF3/ACSL1/ACSS1/ANGPT1/CHST2/CIAO2B/CPS1/DLAT/DLD/DLST/EXT1/FDX2/GCDH/GGT7/GPAM/HSD17B4/IBA57/ISCU/MCCC1/MLYCD/MMUT/NDUFAB1/NFS1/NFU1/NUBPL/OGDH/PDHA1/PDHB/PDHX/PDK1/SLC25A1/SLC25A10/SLC5A6/STAT5A/SUCLA2/SUCLG1/SUCLG2/SUOX/TST	47	Protein
BP	GO:0009201	Ribonucleoside triphosphate biosynthetic process	29/664	119/18870	8.27667e-17	7.94873e-15	6.92544e-15	ATP5F1B/ATP5ME/ATP5PF/NDUFA10/NDUFA11/NDUFA12/NDUFA13/NDUFA5/NDUFA6/NDUFA7/NDUFA9/NDUFAB1/NDUFB10/NDUFB11/NDUFB3/NDUFB6/NDUFB8/NDUFB9/NDUFS1/NDUFS2/NDUFS4/NDUFS6/NDUFS8/NDUFV1/NDUFV2/NME3/SDHA/SDHB/STOML2	29	Protein
BP	GO:0006839	Mitochondrial transport	36/664	190/18870	9.5624e-17	9.01344e-15	7.85309e-15	ABCB10/ACAA2/AIFM1/BCS1L/CPT2/DNAJC19/GDAP1/HK2/HSPD1/HTRA2/MIPEP/MTCH2/MTX1/MUL1/NDUFA13/OXA1L/PITRM1/PMPCA/PMPCB/PPIF/PSEN1/RHOT1/SLC25A10/SLC25A4/SPG7/TIMM10/TIMM13/TIMM29/TIMM44/TIMM50/TIMM8A/TIMM8B/TIMM9/TOMM22/TOMM40/VDAC2	36	Protein
BP	GO:0030258	Lipid modification	35/664	192/18870	8.98625e-16	8.31637e-14	7.24576e-14	ABCD2/ACAA2/ACACB/ACAD10/ACADM/ACADS/ACADVL/ACAT1/ACOT8/ACOX1/ADIPOQ/ALDH1L2/AMACR/AUH/CPT2/CRAT/DECR1/ECH1/ECHS1/ETFA/ETFB/ETFDH/GCDH/HADH/HADHA/HADHB/HSD17B10/HSD17B4/IVD/LEP/MCAT/MLYCD/MTLN/PLPP3/SCP2	35	Protein
BP	GO:1901606	Alpha-amino acid catabolic process	25/664	93/18870	9.2775e-16	8.43259e-14	7.34701e-14	AASS/ACAD8/ACADSB/ACAT1/ALDH4A1/ALDH6A1/AUH/BCAT2/DDAH2/DLST/GCAT/GCSH/GLUD1/GLUD2/GLUL/GPT2/HIBADH/HIBCH/HMGCL/HSD17B10/IVD/MCCC1/MCCC2/SHMT1/THNSL2	25	Protein
BP	GO:0043648	Dicarboxylic acid metabolic process	25/664	94/18870	1.22269e-15	1.09184e-13	9.51285e-14	ACOT8/ACSF3/ALDH1L1/ALDH1L2/ALDH4A1/ALDH5A1/D2HGDH/DGLUCY/DLST/FH/GLUD1/GLUD2/GLUL/GPT2/IDH2/MDH2/ME3/MRPS36/MTHFS/OGDH/PCK1/SDHA/SHMT1/SUCLA2/SUCLG2	25	Protein
BP	GO:0009141	Nucleoside triphosphate metabolic process	34/664	184/18870	1.52352e-15	1.33702e-13	1.1649e-13	AK2/AK3/ATP5F1B/ATP5ME/ATP5PF/CMPK2/DUT/NDUFA10/NDUFA11/NDUFA12/NDUFA13/NDUFA5/NDUFA6/NDUFA7/NDUFA9/NDUFAB1/NDUFB10/NDUFB11/NDUFB3/NDUFB6/NDUFB8/NDUFB9/NDUFS1/NDUFS2/NDUFS4/NDUFS6/NDUFS8/NDUFV1/NDUFV2/NME3/SAMHD1/SDHA/SDHB/STOML2	34	Protein
BP	GO:0033865	Nucleoside bisphosphate metabolic process	28/664	125/18870	2.93921e-15	2.45255e-13	2.13682e-13	AASS/ACACB/ACAT1/ACOT2/ACOT8/ACOT9/ACSF2/ACSF3/ACSL1/ACSS1/DLAT/DLD/DLST/GCDH/GPAM/HSD17B4/MCCC2/MLYCD/MMUT/OGDH/PDHA1/PDHB/PDHX/PDK1/SLC25A1/SUCLA2/SUCLG1/SUCLG2	28	Protein
BP	GO:0033875	Ribonucleoside bisphosphate metabolic process	28/664	125/18870	2.93921e-15	2.45255e-13	2.13682e-13	AASS/ACACB/ACAT1/ACOT2/ACOT8/ACOT9/ACSF2/ACSF3/ACSL1/ACSS1/DLAT/DLD/DLST/GCDH/GPAM/HSD17B4/MCCC2/MLYCD/MMUT/OGDH/PDHA1/PDHB/PDHX/PDK1/SLC25A1/SUCLA2/SUCLG1/SUCLG2	28	Protein
BP	GO:0034032	Purine nucleoside bisphosphate metabolic process	28/664	125/18870	2.93921e-15	2.45255e-13	2.13682e-13	AASS/ACACB/ACAT1/ACOT2/ACOT8/ACOT9/ACSF2/ACSF3/ACSL1/ACSS1/DLAT/DLD/DLST/GCDH/GPAM/HSD17B4/MCCC2/MLYCD/MMUT/OGDH/PDHA1/PDHB/PDHX/PDK1/SLC25A1/SUCLA2/SUCLG1/SUCLG2	28	Protein
BP	GO:0009144	Purine nucleoside triphosphate metabolic process	32/664	167/18870	3.56583e-15	2.92743e-13	2.55057e-13	AK2/AK3/ATP5F1B/ATP5ME/ATP5PF/NDUFA10/NDUFA11/NDUFA12/NDUFA13/NDUFA5/NDUFA6/NDUFA7/NDUFA9/NDUFAB1/NDUFB10/NDUFB11/NDUFB3/NDUFB6/NDUFB8/NDUFB9/NDUFS1/NDUFS2/NDUFS4/NDUFS6/NDUFS8/NDUFV1/NDUFV2/NME3/SAMHD1/SDHA/SDHB/STOML2	32	Protein
BP	GO:0046034	Atp metabolic process	29/664	137/18870	4.5962e-15	3.71344e-13	3.23539e-13	AK2/ATP5F1B/ATP5ME/ATP5PF/NDUFA10/NDUFA11/NDUFA12/NDUFA13/NDUFA5/NDUFA6/NDUFA7/NDUFA9/NDUFAB1/NDUFB10/NDUFB11/NDUFB3/NDUFB6/NDUFB8/NDUFB9/NDUFS1/NDUFS2/NDUFS4/NDUFS6/NDUFS8/NDUFV1/NDUFV2/SDHA/SDHB/STOML2	29	Protein
BP	GO:0007006	Mitochondrial membrane organization	27/664	120/18870	8.21078e-15	6.53014e-13	5.68948e-13	ACAA2/AFG3L2/BCS1L/CHCHD6/HK2/LETM1/MICOS10/MTCH2/MTX1/MUL1/NDUFA13/OMA1/OXA1L/PPIF/RHOT1/SLC25A4/SPG7/TIMM10/TIMM13/TIMM29/TIMM50/TIMM8A/TIMM8B/TIMM9/TOMM22/TOMM40/VDAC2	27	Protein
BP	GO:0009205	Purine ribonucleoside triphosphate metabolic process	31/664	161/18870	8.40339e-15	6.5805e-13	5.73336e-13	AK2/AK3/ATP5F1B/ATP5ME/ATP5PF/NDUFA10/NDUFA11/NDUFA12/NDUFA13/NDUFA5/NDUFA6/NDUFA7/NDUFA9/NDUFAB1/NDUFB10/NDUFB11/NDUFB3/NDUFB6/NDUFB8/NDUFB9/NDUFS1/NDUFS2/NDUFS4/NDUFS6/NDUFS8/NDUFV1/NDUFV2/NME3/SDHA/SDHB/STOML2	31	Protein
BP	GO:1901605	Alpha-amino acid metabolic process	35/664	207/18870	9.81086e-15	7.56625e-13	6.59221e-13	AASS/ACAD8/ACADSB/ACAT1/ALDH4A1/ALDH5A1/ALDH6A1/AUH/BCAT1/BCAT2/CPS1/DDAH2/DGLUCY/DLST/GCAT/GCDH/GCSH/GFPT2/GLUD1/GLUD2/GLUL/GPT2/HIBADH/HIBCH/HMGCL/HSD17B10/IVD/MCCC1/MCCC2/MMUT/MTHFS/PLOD2/SHMT1/SLC25A12/THNSL2	35	Protein
BP	GO:0009199	Ribonucleoside triphosphate metabolic process	31/664	168/18870	2.86049e-14	2.17312e-12	1.89336e-12	AK2/AK3/ATP5F1B/ATP5ME/ATP5PF/NDUFA10/NDUFA11/NDUFA12/NDUFA13/NDUFA5/NDUFA6/NDUFA7/NDUFA9/NDUFAB1/NDUFB10/NDUFB11/NDUFB3/NDUFB6/NDUFB8/NDUFB9/NDUFS1/NDUFS2/NDUFS4/NDUFS6/NDUFS8/NDUFV1/NDUFV2/NME3/SDHA/SDHB/STOML2	31	Protein
BP	GO:0070585	Protein localization to mitochondrion	26/664	131/18870	5.96007e-13	4.46129e-11	3.88696e-11	AIFM1/BCS1L/DNAJC19/GDAP1/HK2/HSPD1/HTRA2/ISG15/MIPEP/MTCH2/MTX1/NDUFA13/OXA1L/PITRM1/PMPCA/PMPCB/TIMM10/TIMM13/TIMM29/TIMM44/TIMM50/TIMM8A/TIMM8B/TIMM9/TOMM22/TOMM40	26	Protein
BP	GO:0072655	Establishment of protein localization to mitochondrion	25/664	124/18870	1.14924e-12	8.47772e-11	7.38633e-11	AIFM1/BCS1L/DNAJC19/GDAP1/HK2/HSPD1/HTRA2/MIPEP/MTCH2/MTX1/NDUFA13/OXA1L/PITRM1/PMPCA/PMPCB/TIMM10/TIMM13/TIMM29/TIMM44/TIMM50/TIMM8A/TIMM8B/TIMM9/TOMM22/TOMM40	25	Protein
BP	GO:0006626	Protein targeting to mitochondrion	22/664	106/18870	1.42557e-11	1.03659e-09	9.03146e-10	AIFM1/DNAJC19/GDAP1/HSPD1/HTRA2/MIPEP/MTCH2/MTX1/NDUFA13/PITRM1/PMPCA/PMPCB/TIMM10/TIMM13/TIMM29/TIMM44/TIMM50/TIMM8A/TIMM8B/TIMM9/TOMM22/TOMM40	22	Protein
BP	GO:0033539	Fatty acid beta-oxidation using acyl-coa dehydrogenase	9/664	12/18870	1.56968e-11	1.1253e-09	9.80436e-10	ACAD10/ACADM/ACADS/ACADVL/ETFA/ETFB/ETFDH/GCDH/IVD	9	Protein
BP	GO:0035384	Thioester biosynthetic process	15/664	47/18870	3.54762e-11	2.47361e-09	2.15517e-09	ACACB/ACAT1/ACSF3/ACSL1/ACSS1/DLAT/DLD/GCDH/MLYCD/MMUT/PDHA1/PDHB/PDHX/PDK1/SLC25A1	15	Protein
BP	GO:0071616	Acyl-coa biosynthetic process	15/664	47/18870	3.54762e-11	2.47361e-09	2.15517e-09	ACACB/ACAT1/ACSF3/ACSL1/ACSS1/DLAT/DLD/GCDH/MLYCD/MMUT/PDHA1/PDHB/PDHX/PDK1/SLC25A1	15	Protein
BP	GO:0046394	Carboxylic acid biosynthetic process	38/664	334/18870	1.97435e-10	1.35803e-08	1.18321e-08	AASS/ABCD2/ABHD2/ACACB/ACADVL/ACOT8/ACSF3/ACSS1/AKR1B1/AMACR/BCAT1/BCAT2/CBR4/CPS1/CYP7B1/FASN/GGT7/GLUD1/GLUD2/GLUL/HSD17B10/HSD17B8/MCAT/MGLL/MID1IP1/MLYCD/NDUFAB1/PECR/PKLR/PLOD2/PNPLA8/PTGES2/RDH10/SCD/SCP2/SHMT1/SUCLA2/THNSL2	38	Protein
BP	GO:0016053	Organic acid biosynthetic process	38/664	337/18870	2.56216e-10	1.73886e-08	1.515e-08	AASS/ABCD2/ABHD2/ACACB/ACADVL/ACOT8/ACSF3/ACSS1/AKR1B1/AMACR/BCAT1/BCAT2/CBR4/CPS1/CYP7B1/FASN/GGT7/GLUD1/GLUD2/GLUL/HSD17B10/HSD17B8/MCAT/MGLL/MID1IP1/MLYCD/NDUFAB1/PECR/PKLR/PLOD2/PNPLA8/PTGES2/RDH10/SCD/SCP2/SHMT1/SUCLA2/THNSL2	38	Protein
BP	GO:0090151	Establishment of protein localization to mitochondrial membrane	13/664	38/18870	2.71636e-10	1.81925e-08	1.58505e-08	BCS1L/MTCH2/MTX1/NDUFA13/OXA1L/TIMM10/TIMM13/TIMM29/TIMM8A/TIMM8B/TIMM9/TOMM22/TOMM40	13	Protein
BP	GO:0072350	Tricarboxylic acid metabolic process	9/664	15/18870	3.24689e-10	2.14632e-08	1.87001e-08	ACO2/CS/GLUD1/IDH2/IDH3A/IDH3B/IDH3G/IREB2/PCK1	9	Protein
BP	GO:0006551	Leucine metabolic process	7/664	8/18870	5.02487e-10	3.27905e-08	2.85692e-08	AUH/BCAT1/BCAT2/HMGCL/IVD/MCCC1/MCCC2	7	Protein
BP	GO:0007007	Inner mitochondrial membrane organization	13/664	40/18870	5.65679e-10	3.64469e-08	3.17549e-08	AFG3L2/CHCHD6/LETM1/MICOS10/MTX1/NDUFA13/OMA1/TIMM10/TIMM13/TIMM29/TIMM8A/TIMM8B/TIMM9	13	Protein
BP	GO:0006084	Acetyl-coa metabolic process	12/664	33/18870	5.88172e-10	3.74225e-08	3.26049e-08	AASS/ACACB/ACAT1/ACSS1/DLAT/DLD/DLST/MLYCD/PDHA1/PDHB/PDHX/PDK1	12	Protein
BP	GO:0033866	Nucleoside bisphosphate biosynthetic process	15/664	58/18870	9.80161e-10	6.01087e-08	5.23706e-08	ACACB/ACAT1/ACSF3/ACSL1/ACSS1/DLAT/DLD/GCDH/MLYCD/MMUT/PDHA1/PDHB/PDHX/PDK1/SLC25A1	15	Protein
BP	GO:0034030	Ribonucleoside bisphosphate biosynthetic process	15/664	58/18870	9.80161e-10	6.01087e-08	5.23706e-08	ACACB/ACAT1/ACSF3/ACSL1/ACSS1/DLAT/DLD/GCDH/MLYCD/MMUT/PDHA1/PDHB/PDHX/PDK1/SLC25A1	15	Protein
BP	GO:0034033	Purine nucleoside bisphosphate biosynthetic process	15/664	58/18870	9.80161e-10	6.01087e-08	5.23706e-08	ACACB/ACAT1/ACSF3/ACSL1/ACSS1/DLAT/DLD/GCDH/MLYCD/MMUT/PDHA1/PDHB/PDHX/PDK1/SLC25A1	15	Protein
BP	GO:0006085	Acetyl-coa biosynthetic process	9/664	18/18870	2.86807e-09	1.73791e-07	1.51418e-07	ACAT1/ACSS1/DLAT/DLD/MLYCD/PDHA1/PDHB/PDHX/PDK1	9	Protein
BP	GO:0019318	Hexose metabolic process	29/664	233/18870	3.68e-09	2.20367e-07	1.91998e-07	ACACB/ACADM/ADIPOQ/AKR1B1/DCXR/DLAT/ENO2/GALK2/GPT2/HK2/LEP/MAN2A1/MAN2A2/MDH2/MLYCD/OAS1/OMA1/PC/PCK1/PDHA1/PDHB/PDK1/RBP4/SELENOS/SLC25A1/SLC25A10/SLC25A11/SLC25A12/SORBS1	29	Protein
BP	GO:0006122	Mitochondrial electron transport, ubiquinol to cytochrome c	8/664	14/18870	5.61348e-09	3.3224e-07	2.89469e-07	CYCS/UQCR10/UQCRB/UQCRC1/UQCRC2/UQCRFS1/UQCRH/UQCRQ	8	Protein
BP	GO:0006573	Valine metabolic process	6/664	7/18870	1.26125e-08	7.37901e-07	6.42907e-07	ACAD8/ALDH6A1/BCAT1/BCAT2/HIBADH/HIBCH	6	Protein
BP	GO:0005996	Monosaccharide metabolic process	30/664	261/18870	1.29045e-08	7.46405e-07	6.50317e-07	ACACB/ACADM/ADIPOQ/AKR1B1/DCXR/DLAT/ENO2/GALK2/GPT2/HK2/LEP/MAN2A1/MAN2A2/MDH2/MLYCD/OAS1/OMA1/PC/PCK1/PDHA1/PDHB/PDK1/RBP4/SELENOS/SLC25A1/SLC25A10/SLC25A11/SLC25A12/SLC2A1/SORBS1	30	Protein
BP	GO:0051204	Protein insertion into mitochondrial membrane	11/664	35/18870	1.82129e-08	1.04161e-06	9.07521e-07	MTCH2/MTX1/NDUFA13/TIMM10/TIMM13/TIMM29/TIMM8A/TIMM8B/TIMM9/TOMM22/TOMM40	11	Protein
BP	GO:0006006	Glucose metabolic process	25/664	193/18870	1.96687e-08	1.11237e-06	9.6917e-07	ACACB/ACADM/ADIPOQ/DCXR/DLAT/ENO2/GPT2/HK2/LEP/MDH2/MLYCD/OAS1/OMA1/PC/PCK1/PDHA1/PDHB/PDK1/RBP4/SELENOS/SLC25A1/SLC25A10/SLC25A11/SLC25A12/SORBS1	25	Protein
BP	GO:0046459	Short-chain fatty acid metabolic process	8/664	16/18870	2.25966e-08	1.26392e-06	1.10121e-06	ACADS/ACSS1/CRAT/MMUT/PCCA/PCCB/PCK1/THNSL2	8	Protein
BP	GO:1902600	Proton transmembrane transport	22/664	160/18870	4.71956e-08	2.61115e-06	2.275e-06	ATP5F1B/ATP5ME/ATP5PF/ATP6V1G2/COX4I1/COX5A/COX5B/COX6B1/LETM1/NNT/PPIF/SLC11A2/SLC25A12/SLC25A18/SLC25A22/SLC25A4/SLC2A10/TMCO3/UQCR10/UQCRC1/UQCRFS1/UQCRH	22	Protein
BP	GO:0043649	Dicarboxylic acid catabolic process	8/664	18/18870	7.21658e-08	3.94972e-06	3.44125e-06	ACOT8/ACSF3/ALDH1L1/ALDH1L2/GLUD1/GLUD2/GLUL/MTHFS	8	Protein
BP	GO:0034982	Mitochondrial protein processing	7/664	13/18870	9.23501e-08	4.94802e-06	4.31104e-06	AFG3L2/MIPEP/OMA1/PMPCA/PMPCB/SPG7/STOML2	7	Protein
BP	GO:0045039	Protein insertion into mitochondrial inner membrane	7/664	13/18870	9.23501e-08	4.94802e-06	4.31104e-06	NDUFA13/TIMM10/TIMM13/TIMM29/TIMM8A/TIMM8B/TIMM9	7	Protein
BP	GO:0072330	Monocarboxylic acid biosynthetic process	26/664	226/18870	1.1812e-07	6.26283e-06	5.45658e-06	ABCD2/ABHD2/ACACB/ACADVL/ACOT8/ACSF3/ACSS1/AMACR/CBR4/CYP7B1/FASN/HSD17B10/HSD17B8/MCAT/MGLL/MID1IP1/MLYCD/NDUFAB1/PECR/PKLR/PNPLA8/PTGES2/RDH10/SCD/SCP2/THNSL2	26	Protein
BP	GO:1990542	Mitochondrial transmembrane transport	13/664	60/18870	1.27003e-07	6.6644e-06	5.80646e-06	AFG3L2/CPT2/DNAJC19/PNPT1/SFXN1/SFXN3/SLC25A12/SLC25A18/SLC25A22/TIMM44/TIMM50/TOMM40/TST	13	Protein
BP	GO:0006090	Pyruvate metabolic process	18/664	118/18870	1.59457e-07	8.28199e-06	7.2158e-06	DHTKD1/DLAT/DLD/ENO2/FAHD1/HK2/ME3/OGDH/PC/PCK1/PDHA1/PDHB/PDHX/PDK1/PKLR/PSEN1/SLC16A3/TREX1	18	Protein
BP	GO:0033013	Tetrapyrrole metabolic process	13/664	62/18870	1.9142e-07	9.84169e-06	8.57472e-06	ABCB10/ABCB7/ALAS1/BLVRB/CLYBL/FECH/IBA57/IREB2/MMAA/MMAB/PPOX/SLC11A2/SUCLA2	13	Protein
BP	GO:0006102	Isocitrate metabolic process	5/664	6/18870	3.09725e-07	1.56089e-05	1.35995e-05	ACO2/IDH2/IDH3A/IDH3B/IDH3G	5	Protein
BP	GO:0006552	Leucine catabolic process	5/664	6/18870	3.09725e-07	1.56089e-05	1.35995e-05	AUH/HMGCL/IVD/MCCC1/MCCC2	5	Protein
BP	GO:0006104	Succinyl-coa metabolic process	6/664	10/18870	3.45478e-07	1.724e-05	1.50206e-05	DLST/MMUT/OGDH/SUCLA2/SUCLG1/SUCLG2	6	Protein
BP	GO:0051205	Protein insertion into membrane	14/664	77/18870	4.2108e-07	2.08087e-05	1.81299e-05	BCS1L/EMC10/MTCH2/MTX1/NDUFA13/OXA1L/TIMM10/TIMM13/TIMM29/TIMM8A/TIMM8B/TIMM9/TOMM22/TOMM40	14	Protein
BP	GO:0016226	Iron-sulfur cluster assembly	9/664	30/18870	5.77495e-07	2.79948e-05	2.43908e-05	ABCB7/CIAO2B/FDX2/IBA57/ISCU/NDUFAB1/NFS1/NFU1/NUBPL	9	Protein
BP	GO:0031163	Metallo-sulfur cluster assembly	9/664	30/18870	5.77495e-07	2.79948e-05	2.43908e-05	ABCB7/CIAO2B/FDX2/IBA57/ISCU/NDUFAB1/NFS1/NFU1/NUBPL	9	Protein
BP	GO:0006086	Acetyl-coa biosynthetic process from pyruvate	6/664	11/18870	7.37383e-07	3.54083e-05	3.085e-05	DLAT/DLD/PDHA1/PDHB/PDHX/PDK1	6	Protein
BP	GO:0019319	Hexose biosynthetic process	15/664	93/18870	8.22003e-07	3.91027e-05	3.40688e-05	ACADM/ADIPOQ/AKR1B1/ENO2/GPT2/LEP/MDH2/PC/PCK1/RBP4/SELENOS/SLC25A1/SLC25A10/SLC25A11/SLC25A12	15	Protein
BP	GO:0030198	Extracellular matrix organization	30/664	321/18870	1.22616e-06	5.77883e-05	5.03489e-05	ADAMTS15/ADAMTS5/ADAMTSL1/COL11A1/COL7A1/COMP/CTSS/DPT/ECM2/ELN/ENG/EXT1/FBLN1/GAS6/GREM1/HAS1/ITGB3/LAMA2/LCP1/LOXL2/LOXL3/MMP2/NFKB2/QSOX1/RUNX1/SLC2A10/SULF1/TNFRSF1A/TNXB/VHL	30	Protein
BP	GO:0043062	Extracellular structure organization	30/664	322/18870	1.30808e-06	6.10839e-05	5.32202e-05	ADAMTS15/ADAMTS5/ADAMTSL1/COL11A1/COL7A1/COMP/CTSS/DPT/ECM2/ELN/ENG/EXT1/FBLN1/GAS6/GREM1/HAS1/ITGB3/LAMA2/LCP1/LOXL2/LOXL3/MMP2/NFKB2/QSOX1/RUNX1/SLC2A10/SULF1/TNFRSF1A/TNXB/VHL	30	Protein
BP	GO:0045229	External encapsulating structure organization	30/664	323/18870	1.39504e-06	6.45523e-05	5.62422e-05	ADAMTS15/ADAMTS5/ADAMTSL1/COL11A1/COL7A1/COMP/CTSS/DPT/ECM2/ELN/ENG/EXT1/FBLN1/GAS6/GREM1/HAS1/ITGB3/LAMA2/LCP1/LOXL2/LOXL3/MMP2/NFKB2/QSOX1/RUNX1/SLC2A10/SULF1/TNFRSF1A/TNXB/VHL	30	Protein
BP	GO:0072528	Pyrimidine-containing compound biosynthetic process	10/664	43/18870	1.82313e-06	8.36013e-05	7.28389e-05	CDA/CMPK2/CPS1/DUT/NME3/PRPS1/SHMT1/SLC4A7/TK2/UPP1	10	Protein
BP	GO:0035456	Response to interferon-beta	9/664	34/18870	1.86622e-06	8.4813e-05	7.38945e-05	BST2/HTRA2/IKBKE/NDUFA13/OAS1/PLSCR1/PNPT1/STING1/TREX1	9	Protein
BP	GO:0120162	Positive regulation of cold-induced thermogenesis	15/664	101/18870	2.41362e-06	0.000107743	9.38731e-05	ACSL1/ADIPOQ/CD36/CPT2/DECR1/FH/G0S2/HADH/KDM1A/KDM3A/LEP/LPIN1/OMA1/SCD/ZNF516	15	Protein
BP	GO:0006779	Porphyrin-containing compound biosynthetic process	9/664	35/18870	2.43428e-06	0.000107743	9.38731e-05	ABCB10/ABCB7/ALAS1/FECH/IBA57/IREB2/PPOX/SLC11A2/SUCLA2	9	Protein
BP	GO:0033014	Tetrapyrrole biosynthetic process	9/664	35/18870	2.43428e-06	0.000107743	9.38731e-05	ABCB10/ABCB7/ALAS1/FECH/IBA57/IREB2/PPOX/SLC11A2/SUCLA2	9	Protein
BP	GO:0046364	Monosaccharide biosynthetic process	15/664	102/18870	2.73927e-06	0.000120197	0.000104724	ACADM/ADIPOQ/AKR1B1/ENO2/GPT2/LEP/MDH2/PC/PCK1/RBP4/SELENOS/SLC25A1/SLC25A10/SLC25A11/SLC25A12	15	Protein
BP	GO:0006094	Gluconeogenesis	14/664	90/18870	2.97253e-06	0.000129318	0.00011267	ACADM/ADIPOQ/ENO2/GPT2/LEP/MDH2/PC/PCK1/RBP4/SELENOS/SLC25A1/SLC25A10/SLC25A11/SLC25A12	14	Protein
BP	GO:0044272	Sulfur compound biosynthetic process	19/664	161/18870	4.03908e-06	0.000174228	0.000151799	ACACB/ACAT1/ACSF3/ACSL1/ACSS1/ANGPT1/CHST2/DLAT/DLD/EXT1/GCDH/GGT7/MLYCD/MMUT/PDHA1/PDHB/PDHX/PDK1/SLC25A1	19	Protein
BP	GO:0140374	Antiviral innate immune response	10/664	48/18870	5.30638e-06	0.00022697	0.000197751	AKAP1/ATAD3A/CLPB/IFIT1/IFIT2/IFIT3/MX1/OAS1/RIGI/STING1	10	Protein
BP	GO:0120161	Regulation of cold-induced thermogenesis	18/664	150/18870	5.69012e-06	0.000241356	0.000210285	ACOT13/ACSL1/ADAMTS5/ADIPOQ/BMAL1/CD36/CPT2/DECR1/FH/G0S2/HADH/KDM1A/KDM3A/LEP/LPIN1/OMA1/SCD/ZNF516	18	Protein
BP	GO:0106106	Cold-induced thermogenesis	18/664	151/18870	6.25235e-06	0.000263012	0.000229153	ACOT13/ACSL1/ADAMTS5/ADIPOQ/BMAL1/CD36/CPT2/DECR1/FH/G0S2/HADH/KDM1A/KDM3A/LEP/LPIN1/OMA1/SCD/ZNF516	18	Protein
BP	GO:0006105	Succinate metabolic process	4/664	5/18870	7.38641e-06	0.000308171	0.000268498	ALDH5A1/SDHA/SUCLA2/SUCLG2	4	Protein
BP	GO:0006633	Fatty acid biosynthetic process	19/664	168/18870	7.56224e-06	0.000310418	0.000270456	ABCD2/ABHD2/ACACB/ACADVL/ACSF3/ACSS1/CBR4/FASN/HSD17B8/MCAT/MGLL/MID1IP1/MLYCD/NDUFAB1/PECR/PNPLA8/PTGES2/SCD/THNSL2	19	Protein
BP	GO:1990845	Adaptive thermogenesis	19/664	168/18870	7.56224e-06	0.000310418	0.000270456	ACOT13/ACSL1/ADAMTS5/ADIPOQ/BMAL1/CD36/CPT2/DECR1/FH/G0S2/HADH/KDM1A/KDM3A/LEP/LPIN1/OMA1/SCD/SLC25A4/ZNF516	19	Protein
BP	GO:0051607	Defense response to virus	29/664	334/18870	7.84404e-06	0.000319409	0.00027829	AKAP1/ATAD3A/BST2/C1QBP/CLPB/DDX60/DDX60L/DTX3L/GPAM/IFIT1/IFIT2/IFIT3/IFIT5/IKBKE/IRF9/ISG15/MUL1/MX1/MX2/OAS1/OAS2/OAS3/OASL/PLSCR1/RIGI/SAMHD1/STING1/TREX1/TSPAN6	29	Protein
BP	GO:0017004	Cytochrome complex assembly	9/664	40/18870	8.05413e-06	0.000325361	0.000283476	BCS1L/COA3/COA6/COX20/LYRM7/SCO2/TACO1/UQCC4/UQCRFS1	9	Protein
BP	GO:0140546	Defense response to symbiont	29/664	335/18870	8.30801e-06	0.000332975	0.000290109	AKAP1/ATAD3A/BST2/C1QBP/CLPB/DDX60/DDX60L/DTX3L/GPAM/IFIT1/IFIT2/IFIT3/IFIT5/IKBKE/IRF9/ISG15/MUL1/MX1/MX2/OAS1/OAS2/OAS3/OASL/PLSCR1/RIGI/SAMHD1/STING1/TREX1/TSPAN6	29	Protein
BP	GO:0006783	Heme biosynthetic process	8/664	31/18870	8.67061e-06	0.000344792	0.000300405	ABCB10/ABCB7/ALAS1/FECH/IBA57/IREB2/PPOX/SLC11A2	8	Protein
BP	GO:0006103	2-oxoglutarate metabolic process	6/664	16/18870	1.09887e-05	0.000433585	0.000377767	D2HGDH/DLST/GPT2/IDH2/MRPS36/OGDH	6	Protein
BP	GO:0006778	Porphyrin-containing compound metabolic process	10/664	53/18870	1.35001e-05	0.000526414	0.000458646	ABCB10/ABCB7/ALAS1/BLVRB/FECH/IBA57/IREB2/PPOX/SLC11A2/SUCLA2	10	Protein
BP	GO:0034340	Response to type i interferon	13/664	89/18870	1.35482e-05	0.000526414	0.000458646	IFIT1/IKBKE/IRAK1/ISG15/MUL1/MX1/OAS1/OAS2/OAS3/SAMHD1/STING1/TREX1/WNT5A	13	Protein
BP	GO:0006221	Pyrimidine nucleotide biosynthetic process	8/664	33/18870	1.43394e-05	0.000552936	0.000481754	CDA/CMPK2/DUT/NME3/PRPS1/SHMT1/SLC4A7/UPP1	8	Protein
BP	GO:0009123	Nucleoside monophosphate metabolic process	12/664	77/18870	1.47721e-05	0.000565337	0.000492558	AK2/AK3/AMPD3/CDA/CMPK2/DUT/PRPS1/PRPS2/SHMT1/TJP2/TK2/UPP1	12	Protein
BP	GO:0006123	Mitochondrial electron transport, cytochrome c to oxygen	7/664	25/18870	1.78804e-05	0.000679189	0.000591754	COX4I1/COX5A/COX5B/COX6B1/COX6C/COX7A2/CYCS	7	Protein
BP	GO:0060338	Regulation of type i interferon-mediated signaling pathway	9/664	44/18870	1.84143e-05	0.000694289	0.000604909	IKBKE/ISG15/MUL1/OAS1/OAS3/SAMHD1/STING1/TREX1/WNT5A	9	Protein
BP	GO:0045071	Negative regulation of viral genome replication	10/664	55/18870	1.90072e-05	0.000711371	0.000619792	BST2/IFIT1/IFIT5/ISG15/MX1/OAS1/OAS2/OAS3/OASL/PLSCR1	10	Protein
BP	GO:0006066	Alcohol metabolic process	30/664	373/18870	2.42227e-05	0.000899952	0.000784096	ACAA2/ACADVL/ACO2/ACSS1/ADH1B/AKR1B1/ALDH2/APOE/CBR4/CYP7B1/DHDDS/FDXR/FECH/FGF2/IDH2/IDH3A/IDH3B/IDH3G/LEP/PCK1/PECR/PLPP3/PNPLA2/PTK2B/RBP4/RDH10/RDH13/SCARB1/SPR/VLDLR	30	Protein
BP	GO:0001659	Temperature homeostasis	19/664	183/18870	2.57105e-05	0.000941485	0.000820282	ACADVL/ACOT13/ACSL1/ADAMTS5/ADIPOQ/BMAL1/CD36/CPT2/DECR1/FH/G0S2/HADH/KDM1A/KDM3A/LEP/LPIN1/OMA1/SCD/ZNF516	19	Protein
BP	GO:0060759	Regulation of response to cytokine stimulus	19/664	183/18870	2.57105e-05	0.000941485	0.000820282	ADIPOQ/ANGPT1/GAS6/IKBKE/IL1RN/IRAK1/ISG15/MAPK7/MUL1/OAS1/OAS3/PARP14/RIGI/SAMHD1/SLIT3/STING1/TNFRSF1A/TREX1/WNT5A	19	Protein
BP	GO:0042168	Heme metabolic process	9/664	46/18870	2.68749e-05	0.000977096	0.000851309	ABCB10/ABCB7/ALAS1/BLVRB/FECH/IBA57/IREB2/PPOX/SLC11A2	9	Protein
BP	GO:0071357	Cellular response to type i interferon	12/664	83/18870	3.21228e-05	0.00115961	0.00101033	IFIT1/IKBKE/IRAK1/ISG15/MUL1/OAS1/OAS2/OAS3/SAMHD1/STING1/TREX1/WNT5A	12	Protein
BP	GO:0033540	Fatty acid beta-oxidation using acyl-coa oxidase	5/664	12/18870	3.42605e-05	0.00120266	0.00104784	ACOT8/ACOX1/AMACR/CRAT/SCP2	5	Protein
BP	GO:0033869	Nucleoside bisphosphate catabolic process	5/664	12/18870	3.42605e-05	0.00120266	0.00104784	ACAT1/MLYCD/SUCLA2/SUCLG1/SUCLG2	5	Protein
BP	GO:0034031	Ribonucleoside bisphosphate catabolic process	5/664	12/18870	3.42605e-05	0.00120266	0.00104784	ACAT1/MLYCD/SUCLA2/SUCLG1/SUCLG2	5	Protein
BP	GO:0034034	Purine nucleoside bisphosphate catabolic process	5/664	12/18870	3.42605e-05	0.00120266	0.00104784	ACAT1/MLYCD/SUCLA2/SUCLG1/SUCLG2	5	Protein
BP	GO:1905039	Carboxylic acid transmembrane transport	17/664	156/18870	3.65258e-05	0.0012734	0.00110947	ABCD2/ACSL1/CD36/CPT2/PSEN1/SFXN1/SFXN3/SLC16A3/SLC25A1/SLC25A10/SLC25A11/SLC25A12/SLC25A18/SLC25A22/SLC2A1/SLC5A6/SLC7A1	17	Protein
BP	GO:0072594	Establishment of protein localization to organelle	34/664	459/18870	3.88748e-05	0.00134607	0.00117279	AIFM1/ANGPT1/BCS1L/CD36/DNAJC19/GDAP1/H1-5/HK2/HSPD1/HTRA2/LEP/MIPEP/MTCH2/MTX1/NDUFA13/OXA1L/PITRM1/PMPCA/PMPCB/PSEN1/SPG11/STK3/TIMM10/TIMM13/TIMM29/TIMM44/TIMM50/TIMM8A/TIMM8B/TIMM9/TOMM22/TOMM40/TXNIP/WBP2	34	Protein
BP	GO:1903825	Organic acid transmembrane transport	17/664	157/18870	3.96489e-05	0.0013636	0.00118806	ABCD2/ACSL1/CD36/CPT2/PSEN1/SFXN1/SFXN3/SLC16A3/SLC25A1/SLC25A10/SLC25A11/SLC25A12/SLC25A18/SLC25A22/SLC2A1/SLC5A6/SLC7A1	17	Protein
BP	GO:0072527	Pyrimidine-containing compound metabolic process	12/664	85/18870	4.09311e-05	0.00139825	0.00121825	AK3/ALDH6A1/CDA/CMPK2/CPS1/DUT/NME3/PRPS1/SHMT1/SLC4A7/TK2/UPP1	12	Protein
BP	GO:0006767	Water-soluble vitamin metabolic process	10/664	60/18870	4.18253e-05	0.00141927	0.00123656	AKR1B1/ALDH1L2/CLYBL/MCCC1/MMAA/MMAB/MTHFS/SHMT1/SLC2A1/SLC5A6	10	Protein
BP	GO:0006549	Isoleucine metabolic process	4/664	7/18870	4.88562e-05	0.00162535	0.00141611	ACADSB/ACAT1/BCAT2/HSD17B10	4	Protein
BP	GO:0019626	Short-chain fatty acid catabolic process	4/664	7/18870	4.88562e-05	0.00162535	0.00141611	ACADS/PCCA/PCCB/PCK1	4	Protein
BP	GO:0070106	Interleukin-27-mediated signaling pathway	4/664	7/18870	4.88562e-05	0.00162535	0.00141611	MX1/OAS1/OAS2/OASL	4	Protein
BP	GO:0009261	Ribonucleotide catabolic process	9/664	51/18870	6.34423e-05	0.00209689	0.00182695	ACAT1/AMPD3/MLYCD/PDE1A/PDE8A/SUCLA2/SUCLG1/SUCLG2/UPP1	9	Protein
BP	GO:0051262	Protein tetramerization	12/664	90/18870	7.26177e-05	0.00238467	0.00207768	ACACB/ACOT13/CBR4/CRYZ/GOLGA2/HSD17B10/HSD17B8/OXA1L/SAMHD1/SHMT1/SSBP1/STK3	12	Protein
BP	GO:0060339	Negative regulation of type i interferon-mediated signaling pathway	6/664	22/18870	8.54598e-05	0.0027691	0.00241262	ISG15/MUL1/OAS1/OAS3/SAMHD1/TREX1	6	Protein
BP	GO:0009166	Nucleotide catabolic process	11/664	78/18870	8.59564e-05	0.0027691	0.00241262	ACAT1/AMPD3/DUT/MLYCD/PDE1A/PDE8A/SAMHD1/SUCLA2/SUCLG1/SUCLG2/UPP1	11	Protein
BP	GO:1901568	Fatty acid derivative metabolic process	11/664	78/18870	8.59564e-05	0.0027691	0.00241262	ACAT1/ACSF3/ACSL1/ACSS3/GCDH/GGT7/HMGCL/HSD17B4/OXCT1/PECR/SLC25A1	11	Protein
BP	GO:0006195	Purine nucleotide catabolic process	9/664	54/18870	0.000100952	0.00321155	0.00279811	ACAT1/AMPD3/MLYCD/PDE1A/PDE8A/SAMHD1/SUCLA2/SUCLG1/SUCLG2	9	Protein
BP	GO:0006220	Pyrimidine nucleotide metabolic process	9/664	54/18870	0.000100952	0.00321155	0.00279811	AK3/CDA/CMPK2/DUT/NME3/PRPS1/SHMT1/SLC4A7/UPP1	9	Protein
BP	GO:0009124	Nucleoside monophosphate biosynthetic process	8/664	43/18870	0.000109797	0.00347124	0.00302436	AMPD3/CDA/DUT/PRPS1/PRPS2/SHMT1/TK2/UPP1	8	Protein
BP	GO:0060761	Negative regulation of response to cytokine stimulus	12/664	94/18870	0.00011142	0.00350079	0.00305011	ADIPOQ/GAS6/IL1RN/ISG15/MAPK7/MUL1/OAS1/OAS3/PARP14/SAMHD1/SLIT3/TREX1	12	Protein
BP	GO:0001959	Regulation of cytokine-mediated signaling pathway	17/664	171/18870	0.000115914	0.00361966	0.00315368	ADIPOQ/ANGPT1/GAS6/IKBKE/IL1RN/IRAK1/ISG15/MUL1/OAS1/OAS3/PARP14/SAMHD1/SLIT3/STING1/TNFRSF1A/TREX1/WNT5A	17	Protein
BP	GO:0042440	Pigment metabolic process	11/664	81/18870	0.000121797	0.00378017	0.00329353	ABCB10/ABCB7/ALAS1/BLVRB/FECH/IBA57/IREB2/PPOX/SLC11A2/VHL/WNT5A	11	Protein
BP	GO:0002063	Chondrocyte development	7/664	33/18870	0.000124377	0.00381372	0.00332276	BMPR2/COL11A1/COMP/EXT1/RFLNB/RUNX2/SULF1	7	Protein
BP	GO:0006536	Glutamate metabolic process	7/664	33/18870	0.000124377	0.00381372	0.00332276	ALDH4A1/ALDH5A1/DGLUCY/GLUD1/GLUD2/GLUL/MTHFS	7	Protein
BP	GO:0006739	Nadp metabolic process	8/664	44/18870	0.000130105	0.00396547	0.00345497	ALDH1L1/ALDH1L2/DCXR/IDH2/NNT/PC/PRPS2/RPE	8	Protein
BP	GO:0060337	Type i interferon-mediated signaling pathway	11/664	82/18870	0.000136271	0.0041287	0.00359719	IKBKE/IRAK1/ISG15/MUL1/OAS1/OAS2/OAS3/SAMHD1/STING1/TREX1/WNT5A	11	Protein
BP	GO:0009154	Purine ribonucleotide catabolic process	8/664	45/18870	0.000153413	0.00462053	0.00402571	ACAT1/AMPD3/MLYCD/PDE1A/PDE8A/SUCLA2/SUCLG1/SUCLG2	8	Protein
BP	GO:0046148	Pigment biosynthetic process	9/664	57/18870	0.000155485	0.0046554	0.00405608	ABCB10/ABCB7/ALAS1/FECH/IBA57/IREB2/PPOX/SLC11A2/WNT5A	9	Protein
BP	GO:0006108	Malate metabolic process	4/664	9/18870	0.000166214	0.00489035	0.00426079	D2HGDH/FH/MDH2/ME3	4	Protein
BP	GO:0046950	Cellular ketone body metabolic process	4/664	9/18870	0.000166214	0.00489035	0.00426079	ACAT1/ACSS3/HMGCL/OXCT1	4	Protein
BP	GO:0060700	Regulation of ribonuclease activity	4/664	9/18870	0.000166214	0.00489035	0.00426079	OAS1/OAS2/OAS3/OASL	4	Protein
BP	GO:0009615	Response to virus	31/664	436/18870	0.000176863	0.00517375	0.0045077	AKAP1/ATAD3A/BST2/C1QBP/CLPB/DCLK1/DDX60/DDX60L/DTX3L/EXT1/GPAM/IFIT1/IFIT2/IFIT3/IFIT5/IKBKE/IRF9/ISG15/MUL1/MX1/MX2/OAS1/OAS2/OAS3/OASL/PLSCR1/RIGI/SAMHD1/STING1/TREX1/TSPAN6	31	Protein
BP	GO:0051591	Response to camp	11/664	85/18870	0.000188779	0.00549077	0.00478391	ADIPOQ/BCKDHB/CPS1/KDM1A/NDUFS4/PCK1/PKLR/PNPT1/PTK2B/THBD/ZFP36L1	11	Protein
BP	GO:0051289	Protein homotetramerization	9/664	59/18870	0.000204012	0.00586679	0.00511153	ACACB/ACOT13/CBR4/CRYZ/GOLGA2/HSD17B10/SAMHD1/SHMT1/SSBP1	9	Protein
BP	GO:0072523	Purine-containing compound catabolic process	9/664	59/18870	0.000204012	0.00586679	0.00511153	ACAT1/AMPD3/MLYCD/PDE1A/PDE8A/SAMHD1/SUCLA2/SUCLG1/SUCLG2	9	Protein
BP	GO:0016051	Carbohydrate biosynthetic process	19/664	214/18870	0.000211092	0.00603628	0.0052592	ACADM/ADIPOQ/AKR1B1/ENO2/EXT1/GPT2/HAS1/LEP/MDH2/PC/PCK1/PTK2B/RBP4/SELENOS/SLC25A1/SLC25A10/SLC25A11/SLC25A12/SORBS1	19	Protein
BP	GO:0006744	Ubiquinone biosynthetic process	5/664	17/18870	0.000231184	0.00653736	0.00569577	COQ5/COQ8B/COQ9/FDXR/NDUFA9	5	Protein
BP	GO:1901663	Quinone biosynthetic process	5/664	17/18870	0.000231184	0.00653736	0.00569577	COQ5/COQ8B/COQ9/FDXR/NDUFA9	5	Protein
BP	GO:1901292	Nucleoside phosphate catabolic process	11/664	87/18870	0.000232571	0.00654024	0.00569828	ACAT1/AMPD3/DUT/MLYCD/PDE1A/PDE8A/SAMHD1/SUCLA2/SUCLG1/SUCLG2/UPP1	11	Protein
BP	GO:1902224	Ketone body metabolic process	4/664	10/18870	0.000269316	0.00753197	0.00656234	ACAT1/ACSS3/HMGCL/OXCT1	4	Protein
BP	GO:0001960	Negative regulation of cytokine-mediated signaling pathway	11/664	89/18870	0.000284653	0.00791741	0.00689816	ADIPOQ/GAS6/IL1RN/ISG15/MUL1/OAS1/OAS3/PARP14/SAMHD1/SLIT3/TREX1	11	Protein
BP	GO:0035458	Cellular response to interferon-beta	6/664	27/18870	0.000291809	0.00802868	0.00699511	HTRA2/NDUFA13/OAS1/PNPT1/STING1/TREX1	6	Protein
BP	GO:0039529	Rig-i signaling pathway	6/664	27/18870	0.000291809	0.00802868	0.00699511	C1QBP/CLPB/DDX60/OAS3/OASL/RIGI	6	Protein
BP	GO:0042407	Cristae formation	5/664	18/18870	0.000310876	0.00850731	0.00741212	AFG3L2/CHCHD6/LETM1/MICOS10/OMA1	5	Protein
BP	GO:0042398	Cellular modified amino acid biosynthetic process	6/664	28/18870	0.000360437	0.00981082	0.00854782	ACADM/CKMT1A/CKMT2/MTHFS/PLOD2/PLSCR1	6	Protein
BP	GO:1901661	Quinone metabolic process	7/664	39/18870	0.000372895	0.0100959	0.00879623	AKR1B1/CBR4/COQ5/COQ8B/COQ9/FDXR/NDUFA9	7	Protein
BP	GO:0140888	Interferon-mediated signaling pathway	12/664	107/18870	0.000382099	0.0102904	0.00896564	IKBKE/IRAK1/ISG15/MUL1/OAS1/OAS2/OAS3/PARP14/SAMHD1/STING1/TREX1/WNT5A	12	Protein
BP	GO:0006743	Ubiquinone metabolic process	5/664	19/18870	0.000409756	0.010524	0.00916921	COQ5/COQ8B/COQ9/FDXR/NDUFA9	5	Protein
BP	GO:0006101	Citrate metabolic process	3/664	5/18870	0.000411325	0.010524	0.00916921	ACO2/CS/IREB2	3	Protein
BP	GO:0019541	Propionate metabolic process	3/664	5/18870	0.000411325	0.010524	0.00916921	ACSS1/MMUT/PCK1	3	Protein
BP	GO:0044572	[4fe-4s] cluster assembly	3/664	5/18870	0.000411325	0.010524	0.00916921	FDX2/ISCU/NFS1	3	Protein
BP	GO:0051410	Detoxification of nitrogen compound	3/664	5/18870	0.000411325	0.010524	0.00916921	GSTM3/MTARC1/MTARC2	3	Protein
BP	GO:0070458	Cellular detoxification of nitrogen compound	3/664	5/18870	0.000411325	0.010524	0.00916921	GSTM3/MTARC1/MTARC2	3	Protein
BP	GO:0034115	Negative regulation of heterotypic cell-cell adhesion	4/664	11/18870	0.00041145	0.010524	0.00916921	ADIPOQ/IL1RN/MAPK7/MBP	4	Protein
BP	GO:0044571	[2fe-2s] cluster assembly	4/664	11/18870	0.00041145	0.010524	0.00916921	FDX2/ISCU/NDUFAB1/NFS1	4	Protein
BP	GO:0046501	Protoporphyrinogen ix metabolic process	4/664	11/18870	0.00041145	0.010524	0.00916921	ALAS1/FECH/IREB2/PPOX	4	Protein
BP	GO:0070587	Regulation of cell-cell adhesion involved in gastrulation	4/664	11/18870	0.00041145	0.010524	0.00916921	ADIPOQ/IL1RN/MAPK7/MBP	4	Protein
BP	GO:0042180	Cellular ketone metabolic process	19/664	226/18870	0.00042113	0.0107178	0.00933801	ABCD2/ACACB/ACADVL/ADIPOQ/AKR1B1/CBR4/COQ5/COQ8B/COQ9/FDXR/HSD17B10/MID1IP1/MLYCD/MTLN/NDUFA9/OXCT1/PDK1/RDH10/TREX1	19	Protein
BP	GO:0006605	Protein targeting	25/664	339/18870	0.000426811	0.0108083	0.00941689	AIFM1/CEMIP/DNAJC19/GDAP1/HSPD1/HTRA2/KIF13B/MIPEP/MTCH2/MTX1/NDUFA13/PITRM1/PMPCA/PMPCB/SDCBP/TIMM10/TIMM13/TIMM29/TIMM44/TIMM50/TIMM8A/TIMM8B/TIMM9/TOMM22/TOMM40	25	Protein
BP	GO:1901570	Fatty acid derivative biosynthetic process	8/664	52/18870	0.000431424	0.0108107	0.00941894	ACAT1/ACSF3/ACSL1/ACSS3/GCDH/GGT7/HMGCL/SLC25A1	8	Protein
BP	GO:0006730	One-carbon metabolic process	7/664	40/18870	0.000438438	0.0108107	0.00941894	ALDH1L1/ALDH1L2/CA5B/MTHFS/SFXN1/SFXN3/SHMT1	7	Protein
BP	GO:0009064	Glutamine family amino acid metabolic process	10/664	79/18870	0.00043909	0.0108107	0.00941894	ALDH4A1/ALDH5A1/CPS1/DDAH2/DGLUCY/GFPT2/GLUD1/GLUD2/GLUL/MTHFS	10	Protein
BP	GO:0019362	Pyridine nucleotide metabolic process	10/664	79/18870	0.00043909	0.0108107	0.00941894	ALDH1L1/ALDH1L2/DCXR/IDH2/MDH2/NAMPT/NNT/PC/PRPS2/RPE	10	Protein
BP	GO:0046496	Nicotinamide nucleotide metabolic process	10/664	79/18870	0.00043909	0.0108107	0.00941894	ALDH1L1/ALDH1L2/DCXR/IDH2/MDH2/NAMPT/NNT/PC/PRPS2/RPE	10	Protein
BP	GO:0016485	Protein processing	20/664	245/18870	0.000439647	0.0108107	0.00941894	AFG3L2/CASP9/CLEC3B/COMP/CPM/CTSS/HTRA2/MIPEP/OMA1/PITRM1/PLAUR/PMPCA/PMPCB/PSEN1/RUNX1/SERPINE1/SPG7/STOML2/THBD/XPNPEP3	20	Protein
BP	GO:0008637	Apoptotic mitochondrial changes	12/664	110/18870	0.000492824	0.01206	0.0105074	ACAA2/HK2/HSPD1/IFIT2/MUL1/NDUFS1/PLAUR/PPIF/RHOT1/SLC25A4/TIMM50/VDAC2	12	Protein
BP	GO:0015711	Organic anion transport	30/664	443/18870	0.000507044	0.0122958	0.0107129	ABCD2/ACSL1/APOE/CD36/CPT2/CRABP2/CYB5R1/LEP/MFSD10/PLA2G2A/PLIN2/PNPLA8/PSEN1/SFXN1/SFXN3/SLC16A3/SLC25A1/SLC25A10/SLC25A11/SLC25A12/SLC25A18/SLC25A22/SLC25A4/SLC2A1/SLC2A10/SLC2A4/SLC43A3/SLC4A7/SLC5A6/SLC7A1	30	Protein
BP	GO:0070482	Response to oxygen levels	25/664	343/18870	0.000507291	0.0122958	0.0107129	ACAA2/ADIPOQ/AIFM1/ARNT2/CASP9/FOSL2/HK2/IRAK1/ITPR1/LEP/LOXL2/LPAR1/MMP2/NDUFS2/PCK1/PDK1/PKLR/PLOD2/PTK2B/SLC11A2/SLC2A1/SLC2A4/TXN2/VHL/ZFP36L1	25	Protein
BP	GO:1902001	Fatty acid transmembrane transport	5/664	20/18870	0.000530626	0.0128004	0.0111525	ABCD2/ACSL1/CD36/CPT2/SLC2A1	5	Protein
BP	GO:0008535	Respiratory chain complex iv assembly	6/664	30/18870	0.000535092	0.0128473	0.0111934	BCS1L/COA3/COA6/COX20/SCO2/TACO1	6	Protein
BP	GO:0015909	Long-chain fatty acid transport	9/664	67/18870	0.000540893	0.0128805	0.0112224	ABCD2/ACSL1/APOE/CD36/CPT2/PLA2G2A/PLIN2/PNPLA8/SLC2A1	9	Protein
BP	GO:0046683	Response to organophosphorus	13/664	127/18870	0.00054154	0.0128805	0.0112224	ADIPOQ/BCKDHB/CPS1/KDM1A/LPAR1/NDUFS4/PANX1/PCK1/PKLR/PNPT1/PTK2B/THBD/ZFP36L1	13	Protein
BP	GO:0010883	Regulation of lipid storage	8/664	54/18870	0.000560818	0.013277	0.0115678	ACACB/CD36/IKBKE/ITGB3/LEP/PLIN2/PNPLA2/SCARB1	8	Protein
BP	GO:0017062	Respiratory chain complex iii assembly	4/664	12/18870	0.000600045	0.0140102	0.0122066	BCS1L/LYRM7/UQCC4/UQCRFS1	4	Protein
BP	GO:0034551	Mitochondrial respiratory chain complex iii assembly	4/664	12/18870	0.000600045	0.0140102	0.0122066	BCS1L/LYRM7/UQCC4/UQCRFS1	4	Protein
BP	GO:0070586	Cell-cell adhesion involved in gastrulation	4/664	12/18870	0.000600045	0.0140102	0.0122066	ADIPOQ/IL1RN/MAPK7/MBP	4	Protein
BP	GO:0006919	Activation of cysteine-type endopeptidase activity involved in apoptotic process	9/664	68/18870	0.00060429	0.0140449	0.0122368	AIFM1/ANP32B/BCL2L13/CASP9/CYCS/F2R/HSPD1/HSPE1/MUL1	9	Protein
BP	GO:0008053	Mitochondrial fusion	6/664	31/18870	0.000643982	0.0148994	0.0129813	AFG3L2/GDAP1/MTCH2/MUL1/OMA1/STOML2	6	Protein
BP	GO:0046434	Organophosphate catabolic process	14/664	146/18870	0.000651734	0.0150105	0.0130781	ACAT1/AMPD3/DUT/MLYCD/PDE1A/PDE8A/PLD1/PNPLA8/SAMHD1/SCARB1/SUCLA2/SUCLG1/SUCLG2/UPP1	14	Protein
BP	GO:1901607	Alpha-amino acid biosynthetic process	9/664	69/18870	0.000673638	0.0154451	0.0134568	AASS/BCAT1/BCAT2/CPS1/GLUD1/GLUD2/GLUL/PLOD2/SHMT1	9	Protein
BP	GO:0045069	Regulation of viral genome replication	10/664	85/18870	0.000789972	0.0177289	0.0154466	BST2/IFIT1/IFIT5/ISG15/MX1/OAS1/OAS2/OAS3/OASL/PLSCR1	10	Protein
BP	GO:0072524	Pyridine-containing compound metabolic process	10/664	85/18870	0.000789972	0.0177289	0.0154466	ALDH1L1/ALDH1L2/DCXR/IDH2/MDH2/NAMPT/NNT/PC/PRPS2/RPE	10	Protein
BP	GO:0001667	Ameboidal-type cell migration	32/664	497/18870	0.00079056	0.0177289	0.0154466	ADGRA2/ANGPT1/APOE/ARHGDIB/ATP5F1B/BMPR2/C1QBP/CD248/CDH13/CENPV/EFNB1/EMC10/FGF2/FN1/GLIPR2/GLUL/GREM1/HAS1/HDAC5/ITGB3/JCAD/LAMTOR2/LOXL2/LPXN/MEGF8/PLPP3/PTK2B/SCARB1/STAT5A/TPBG/VHL/WNT5A	32	Protein
BP	GO:0002062	Chondrocyte differentiation	12/664	116/18870	0.000796392	0.0177289	0.0154466	BMPR2/CCN4/COL11A1/COMP/EXT1/FOSL2/GREM1/LOXL2/RFLNB/RUNX1/RUNX2/SULF1	12	Protein
BP	GO:0015908	Fatty acid transport	12/664	116/18870	0.000796392	0.0177289	0.0154466	ABCD2/ACSL1/APOE/CD36/CPT2/CRABP2/LEP/PLA2G2A/PLIN2/PNPLA8/SLC2A1/SLC43A3	12	Protein
BP	GO:0000965	Mitochondrial rna 3'-end processing	3/664	6/18870	0.00080111	0.0177289	0.0154466	ELAC2/HSD17B10/PNPT1	3	Protein
BP	GO:0046073	Dtmp metabolic process	3/664	6/18870	0.00080111	0.0177289	0.0154466	DUT/SHMT1/UPP1	3	Protein
BP	GO:1901289	Succinyl-coa catabolic process	3/664	6/18870	0.00080111	0.0177289	0.0154466	SUCLA2/SUCLG1/SUCLG2	3	Protein
BP	GO:0036293	Response to decreased oxygen levels	23/664	315/18870	0.000816916	0.0180004	0.0156831	ACAA2/ADIPOQ/AIFM1/ARNT2/CASP9/FOSL2/HK2/IRAK1/ITPR1/LEP/LOXL2/MMP2/PCK1/PDK1/PKLR/PLOD2/PTK2B/SLC11A2/SLC2A1/SLC2A4/TXN2/VHL/ZFP36L1	23	Protein
BP	GO:1902652	Secondary alcohol metabolic process	14/664	150/18870	0.000851957	0.0186916	0.0162854	ACAA2/ACADVL/ACO2/APOE/CYP7B1/FDXR/FECH/IDH2/IDH3A/IDH3B/IDH3G/LEP/SCARB1/VLDLR	14	Protein
BP	GO:0001666	Response to hypoxia	22/664	298/18870	0.000910177	0.0198765	0.0173177	ACAA2/ADIPOQ/ARNT2/CASP9/FOSL2/HK2/IRAK1/ITPR1/LEP/LOXL2/MMP2/PCK1/PDK1/PKLR/PLOD2/PTK2B/SLC11A2/SLC2A1/SLC2A4/TXN2/VHL/ZFP36L1	22	Protein
BP	GO:1902686	Mitochondrial outer membrane permeabilization involved in programmed cell death	7/664	45/18870	0.000916713	0.0198765	0.0173177	ACAA2/MUL1/PPIF/RHOT1/SLC25A4/SPG7/VDAC2	7	Protein
BP	GO:0014823	Response to activity	9/664	72/18870	0.000921584	0.0198765	0.0173177	ADIPOQ/HADH/HDAC5/ITGB3/LEP/MMP2/PCK1/SCO2/UQCRC1	9	Protein
BP	GO:0032481	Positive regulation of type i interferon production	9/664	72/18870	0.000921584	0.0198765	0.0173177	HSPD1/IKBKE/IRAK1/ISG15/OAS1/OAS2/OAS3/RIGI/STING1	9	Protein
BP	GO:0009161	Ribonucleoside monophosphate metabolic process	8/664	59/18870	0.00102473	0.022008	0.0191748	AK2/AK3/AMPD3/CDA/PRPS1/PRPS2/TJP2/UPP1	8	Protein
BP	GO:0006740	Nadph regeneration	5/664	23/18870	0.00105526	0.0225684	0.019663	ALDH1L1/ALDH1L2/NNT/PRPS2/RPE	5	Protein
BP	GO:0071472	Cellular response to salt stress	4/664	14/18870	0.00114712	0.0244303	0.0212853	AKR1B1/LETM1/PCK1/ZFP36L1	4	Protein
BP	GO:0035794	Positive regulation of mitochondrial membrane permeability	7/664	47/18870	0.00119568	0.0253584	0.0220939	ACAA2/MUL1/PPIF/RHOT1/SLC25A4/SPG7/VDAC2	7	Protein
BP	GO:0090559	Regulation of membrane permeability	9/664	75/18870	0.00123893	0.0261665	0.022798	ACAA2/HK2/MUL1/PPIF/RHOT1/SLC25A4/SPG7/TJP2/VDAC2	9	Protein
BP	GO:0009112	Nucleobase metabolic process	6/664	35/18870	0.00126002	0.0265021	0.0230903	ALDH6A1/CDA/CPS1/KDM1A/PRPS1/SHMT1	6	Protein
BP	GO:0006641	Triglyceride metabolic process	11/664	106/18870	0.00126624	0.0265232	0.0231088	ACSL1/APOE/CPS1/GPAM/LPIN1/MGLL/PCK1/PNPLA2/SCARB1/TBL1XR1/TNXB	11	Protein
BP	GO:0046902	Regulation of mitochondrial membrane permeability	8/664	61/18870	0.00127974	0.0265873	0.0231645	ACAA2/HK2/MUL1/PPIF/RHOT1/SLC25A4/SPG7/VDAC2	8	Protein
BP	GO:0050994	Regulation of lipid catabolic process	8/664	61/18870	0.00127974	0.0265873	0.0231645	ABCD2/ACACB/MLYCD/MTLN/PDE3B/PNPLA2/RARRES2/SCARB1	8	Protein
BP	GO:0009651	Response to salt stress	5/664	24/18870	0.00129476	0.0267899	0.0233411	AKR1B1/LETM1/PCK1/PTK2B/ZFP36L1	5	Protein
BP	GO:0006627	Protein processing involved in protein targeting to mitochondrion	3/664	7/18870	0.0013653	0.0279092	0.0243163	MIPEP/PMPCA/PMPCB	3	Protein
BP	GO:0008655	Pyrimidine-containing compound salvage	3/664	7/18870	0.0013653	0.0279092	0.0243163	CDA/TK2/UPP1	3	Protein
BP	GO:0009221	Pyrimidine deoxyribonucleotide biosynthetic process	3/664	7/18870	0.0013653	0.0279092	0.0243163	CMPK2/DUT/SHMT1	3	Protein
BP	GO:0006869	Lipid transport	29/664	453/18870	0.00149028	0.0303291	0.0264247	ABCD2/ACSL1/ADIPOQ/APOE/APOL3/CD36/CPT2/CRABP2/GRAMD1A/GULP1/ITGB3/KDM5B/LEP/PLA2G2A/PLIN2/PLSCR1/PNPLA8/RBP4/SCARB1/SCP2/SLC25A10/SLC25A11/SLC2A1/SLC43A3/SPG11/SPNS1/STARD5/TNFAIP8L3/VLDLR	29	Protein
BP	GO:0008652	Amino acid biosynthetic process	9/664	77/18870	0.0014956	0.0303291	0.0264247	AASS/BCAT1/BCAT2/CPS1/GLUD1/GLUD2/GLUL/PLOD2/SHMT1	9	Protein
BP	GO:0007008	Outer mitochondrial membrane organization	4/664	15/18870	0.001521	0.0306003	0.026661	MTCH2/MTX1/TOMM22/TOMM40	4	Protein
BP	GO:0045040	Protein insertion into mitochondrial outer membrane	4/664	15/18870	0.001521	0.0306003	0.026661	MTCH2/MTX1/TOMM22/TOMM40	4	Protein
BP	GO:0043457	Regulation of cellular respiration	7/664	49/18870	0.0015371	0.0308025	0.0268372	CISD1/COX7A2/ISCU/PNPT1/PPIF/TRAP1/TREX1	7	Protein
BP	GO:0030100	Regulation of endocytosis	21/664	291/18870	0.00156242	0.0311069	0.0271024	ADIPOQ/ANGPT1/APOE/ARFGAP1/ATAD1/CD36/CDH13/DKK1/GAS6/GREM1/ITGB3/LPAR1/PACSIN3/PLSCR1/PPP3CB/PPP3CC/SCARB1/SDCBP/SERPINE1/TF/WNT5A	21	Protein
BP	GO:0046942	Carboxylic acid transport	24/664	351/18870	0.00156451	0.0311069	0.0271024	ABCD2/ACSL1/APOE/CD36/CPT2/CRABP2/LEP/PLA2G2A/PLIN2/PNPLA8/PSEN1/SFXN1/SFXN3/SLC16A3/SLC25A1/SLC25A10/SLC25A11/SLC25A12/SLC25A18/SLC25A22/SLC2A1/SLC43A3/SLC5A6/SLC7A1	24	Protein
BP	GO:0033617	Mitochondrial cytochrome c oxidase assembly	5/664	25/18870	0.0015721	0.0311362	0.0271279	BCS1L/COA3/COX20/SCO2/TACO1	5	Protein
BP	GO:0048525	Negative regulation of viral process	10/664	93/18870	0.00158768	0.0312502	0.0272272	BST2/IFIT1/IFIT5/ISG15/MX1/OAS1/OAS2/OAS3/OASL/PLSCR1	10	Protein
BP	GO:0006766	Vitamin metabolic process	11/664	109/18870	0.00159014	0.0312502	0.0272272	AKR1B1/ALDH1L2/CLYBL/MCCC1/MMAA/MMAB/MTHFS/RDH10/SHMT1/SLC2A1/SLC5A6	11	Protein
BP	GO:1901136	Carbohydrate derivative catabolic process	15/664	178/18870	0.00160354	0.0313924	0.0273511	ABHD10/ACAT1/AMPD3/CDA/CEMIP/DUT/FGF2/MLYCD/PDE1A/PDE8A/SAMHD1/SUCLA2/SUCLG1/SUCLG2/UPP1	15	Protein
BP	GO:0015849	Organic acid transport	24/664	352/18870	0.00162495	0.0316897	0.0276101	ABCD2/ACSL1/APOE/CD36/CPT2/CRABP2/LEP/PLA2G2A/PLIN2/PNPLA8/PSEN1/SFXN1/SFXN3/SLC16A3/SLC25A1/SLC25A10/SLC25A11/SLC25A12/SLC25A18/SLC25A22/SLC2A1/SLC43A3/SLC5A6/SLC7A1	24	Protein
BP	GO:0007369	Gastrulation	16/664	197/18870	0.00167153	0.0324736	0.0282931	ADIPOQ/BMPR2/COL11A1/COL7A1/DKK1/DLD/EXT1/FN1/IL1RN/ITGB3/MAPK7/MBP/MEGF8/MMP2/PLPP3/WNT5A	16	Protein
BP	GO:0051259	Protein complex oligomerization	19/664	255/18870	0.00178156	0.0344797	0.0300409	ACACB/ACOT13/CBR4/CLYBL/COMP/CRYZ/GOLGA2/HSD17B10/HSD17B8/ISG15/LETM1/OXA1L/PNPT1/SAMHD1/SHMT1/SSBP1/STING1/STK3/STOML2	19	Protein
BP	GO:0043280	Positive regulation of cysteine-type endopeptidase activity involved in apoptotic process	11/664	111/18870	0.00184151	0.0355049	0.0309341	AIFM1/ANP32B/BCL2L13/CASP9/CYCS/F2R/HSPD1/HSPE1/HTRA2/MUL1/NDUFA13	11	Protein
BP	GO:0030199	Collagen fibril organization	8/664	65/18870	0.00194011	0.0372267	0.0324343	COL11A1/COMP/DPT/EXT1/GREM1/LOXL2/LOXL3/TNXB	8	Protein
BP	GO:1905710	Positive regulation of membrane permeability	7/664	51/18870	0.00195	0.0372267	0.0324343	ACAA2/MUL1/PPIF/RHOT1/SLC25A4/SPG7/VDAC2	7	Protein
BP	GO:0044273	Sulfur compound catabolic process	6/664	38/18870	0.00196007	0.0372267	0.0324343	ACAT1/MLYCD/SUCLA2/SUCLG1/SUCLG2/TST	6	Protein
BP	GO:0044743	Protein transmembrane import into intracellular organelle	6/664	38/18870	0.00196007	0.0372267	0.0324343	AIFM1/DNAJC19/HSPD1/TIMM44/TIMM50/TOMM40	6	Protein
BP	GO:0009130	Pyrimidine nucleoside monophosphate biosynthetic process	4/664	16/18870	0.00197198	0.0373138	0.0325102	CDA/DUT/SHMT1/UPP1	4	Protein
BP	GO:0009636	Response to toxic substance	19/664	258/18870	0.00203531	0.0383693	0.0334298	AIFM1/APOE/BPHL/CD36/CPS1/FECH/GSTM3/HP/HTRA2/KDM1A/KDM5B/MBP/MT1A/MT1X/MTARC1/MTARC2/NNT/PRXL2A/SELENOS	19	Protein
BP	GO:0006538	Glutamate catabolic process	3/664	8/18870	0.00212749	0.0396664	0.0345599	GLUD1/GLUD2/GLUL	3	Protein
BP	GO:0035754	B cell chemotaxis	3/664	8/18870	0.00212749	0.0396664	0.0345599	CYP7B1/GAS6/PTK2B	3	Protein
BP	GO:0045906	Negative regulation of vasoconstriction	3/664	8/18870	0.00212749	0.0396664	0.0345599	BMPR2/LEP/MMP2	3	Protein
BP	GO:0010595	Positive regulation of endothelial cell migration	12/664	130/18870	0.00214113	0.039775	0.0346545	ADGRA2/ANGPT1/ATP5F1B/EMC10/FGF2/ITGB3/JCAD/PLPP3/PTK2B/SCARB1/STAT5A/WNT5A	12	Protein
BP	GO:0090150	Establishment of protein localization to membrane	20/664	280/18870	0.00225208	0.0411236	0.0358295	ATAD1/BCS1L/CEMIP/EMC10/MTCH2/MTX1/NDUFA13/OXA1L/SDCBP/SYNE3/TIMM10/TIMM13/TIMM29/TIMM8A/TIMM8B/TIMM9/TOMM22/TOMM40/TRARG1/VAMP3	20	Protein
BP	GO:0009065	Glutamine family amino acid catabolic process	5/664	27/18870	0.00225412	0.0411236	0.0358295	ALDH4A1/DDAH2/GLUD1/GLUD2/GLUL	5	Protein
BP	GO:0010884	Positive regulation of lipid storage	5/664	27/18870	0.00225412	0.0411236	0.0358295	ACACB/CD36/IKBKE/PLIN2/SCARB1	5	Protein
BP	GO:0015740	C4-dicarboxylate transport	5/664	27/18870	0.00225412	0.0411236	0.0358295	SLC25A10/SLC25A11/SLC25A12/SLC25A18/SLC25A22	5	Protein
BP	GO:0046949	Fatty-acyl-coa biosynthetic process	5/664	27/18870	0.00225412	0.0411236	0.0358295	ACAT1/ACSF3/ACSL1/GCDH/SLC25A1	5	Protein
BP	GO:0019079	Viral genome replication	12/664	131/18870	0.00228366	0.0415137	0.0361694	BST2/GAS6/GRK2/IFIT1/IFIT5/ISG15/MX1/OAS1/OAS2/OAS3/OASL/PLSCR1	12	Protein
BP	GO:0006721	Terpenoid metabolic process	10/664	98/18870	0.00235423	0.0426442	0.0371544	ADH1B/AKR1B1/CRABP2/HTRA2/PECR/PNPLA2/RARRES2/RBP4/RDH10/RDH13	10	Protein
BP	GO:0045088	Regulation of innate immune response	27/664	425/18870	0.00237667	0.0428981	0.0373756	APOE/C1QBP/CD36/CLPB/CTSS/DDX60/ECSIT/HLA-B/HSPD1/IKBKE/IRAK1/IRAK4/ISG15/LEP/MUL1/OAS1/OAS3/OASL/PARP14/PLSCR1/RIGI/SAMHD1/STING1/TMEM126A/TREX1/TSPAN6/WNT5A	27	Protein
BP	GO:0033559	Unsaturated fatty acid metabolic process	11/664	115/18870	0.00244148	0.0438016	0.0381628	ABCD2/ACOT8/ACOX1/AKR1B1/CYP2U1/MGLL/PNPLA8/PTGES2/SCD/SCP2/TNFRSF1A	11	Protein
BP	GO:0048146	Positive regulation of fibroblast proliferation	7/664	53/18870	0.00244394	0.0438016	0.0381628	CD248/FN1/FOSL2/GAS6/ITGB3/NDUFS4/WNT5A	7	Protein
BP	GO:0071360	Cellular response to exogenous dsrna	4/664	17/18870	0.00250762	0.0447851	0.0390197	IFIT1/MUL1/RIGI/STING1	4	Protein
BP	GO:0032728	Positive regulation of interferon-beta production	6/664	40/18870	0.0025681	0.0455457	0.0396824	ISG15/OAS1/OAS2/OAS3/RIGI/STING1	6	Protein
BP	GO:0035337	Fatty-acyl-coa metabolic process	6/664	40/18870	0.0025681	0.0455457	0.0396824	ACAT1/ACSF3/ACSL1/GCDH/HSD17B4/SLC25A1	6	Protein
BP	GO:0043542	Endothelial cell migration	20/664	284/18870	0.00265309	0.0468897	0.0408533	ADGRA2/ANGPT1/APOE/ATP5F1B/CDH13/EMC10/FGF2/GLUL/GREM1/HDAC5/ITGB3/JCAD/LOXL2/LPXN/PLPP3/PTK2B/SCARB1/STAT5A/VHL/WNT5A	20	Protein
BP	GO:0003094	Glomerular filtration	5/664	28/18870	0.00266579	0.0469511	0.0409069	F2R/GAS6/MCAM/SULF1/XPNPEP3	5	Protein
BP	GO:0006639	Acylglycerol metabolic process	12/664	134/18870	0.00275838	0.0483151	0.0420953	ABHD2/ACSL1/APOE/CPS1/GPAM/LPIN1/MGLL/PCK1/PNPLA2/SCARB1/TBL1XR1/TNXB	12	Protein
BP	GO:0061448	Connective tissue development	20/664	285/18870	0.00276222	0.0483151	0.0420953	ABHD15/ACAT1/BMPR2/CCN4/COL11A1/COMP/EXT1/FGF2/FOSL2/GREM1/ITGB3/LEP/LOXL2/RFLNB/RUNX1/RUNX2/SULF1/TBL1XR1/WNT5A/ZNF516	20	Protein
BP	GO:0010952	Positive regulation of peptidase activity	14/664	170/18870	0.00279664	0.0487496	0.0424738	AIFM1/ANP32B/BCL2L13/CASP9/CTSS/CYCS/F2R/HSPD1/HSPE1/HTRA2/MBP/MUL1/NDUFA13/PSME2	14	Protein
CC	GO:0005759	Mitochondrial matrix	172/677	487/19886	7.10133e-131	3.54356e-128	3.04236e-128	AASS/ABHD10/ACAA2/ACAD10/ACAD8/ACADM/ACADS/ACADSB/ACADVL/ACAT1/ACO2/ACOT13/ACOT2/ACOT9/ACSF2/ACSF3/ACSS1/ACSS3/AK3/ALAS1/ALDH1L2/ALDH2/ALDH4A1/ALDH5A1/ALDH6A1/ATAD3A/ATP5F1B/AUH/BCAT2/BCKDHA/BCKDHB/BDH1/C1QBP/CA5B/CBR4/CHCHD1/CLPP/COQ5/CPS1/CS/D2HGDH/DAP3/DARS2/DBT/DECR1/DGLUCY/DHTKD1/DLAT/DLD/DLST/DNAJA3/DNAJC19/ECHS1/ELAC2/ETFA/ETFB/ETFDH/FAHD1/FDX2/FDXR/FECH/FH/GCDH/GCSH/GFM1/GLUD1/GLUD2/GPT2/…	172	Protein
CC	GO:0005743	Mitochondrial inner membrane	141/677	497/19886	3.03057e-91	7.56126e-89	6.49179e-89	ABCB10/ABCB7/ABCB8/ACADVL/AFG3L2/AIFM1/ALAS1/ATAD3A/ATP5F1B/ATP5ME/ATP5PF/BCS1L/BDH1/CHCHD1/CHCHD6/CKMT1A/CKMT2/COA3/COQ5/COQ9/COX20/COX4I1/COX5A/COX5B/COX6B1/COX6C/COX7A2/CPS1/CPT2/CRAT/CYCS/CYP2U1/DAP3/DNAJC19/ECSIT/ETFDH/FDXR/FECH/GCAT/HADHA/HADHB/HIGD1A/HIGD2A/HSPD1/LDHD/LETM1/MICOS10/MRPL1/MRPL11/MRPL13/MRPL15/MRPL19/MRPL22/MRPL23/MRPL24/MRPL27/MRPL3/MRPL32/MRPL39/MRPL40/MRPL45/MRPL47/MRPL53…	141	Protein
CC	GO:0098798	Mitochondrial protein-containing complex	112/677	300/19886	7.97044e-87	1.32575e-84	1.13824e-84	AFG3L2/ATP5F1B/ATP5ME/ATP5PF/BCKDHA/BCKDHB/BCS1L/CHCHD1/CHCHD6/COX4I1/COX5A/COX5B/COX6B1/COX6C/COX7A2/DAP3/DBT/DLAT/DLD/DNAJC19/HADHA/HADHB/HSD17B10/IDH3A/IDH3B/IDH3G/ISCU/MCCC1/MCCC2/MICOS10/MRPL1/MRPL11/MRPL13/MRPL15/MRPL19/MRPL22/MRPL23/MRPL24/MRPL27/MRPL3/MRPL32/MRPL39/MRPL40/MRPL45/MRPL47/MRPL53/MRPS14/MRPS18A/MRPS18B/MRPS2/MRPS24/MRPS26/MRPS30/MRPS36/MRPS7/MRPS9/MTX1/NDUFA10/NDUFA11/NDUFA12…	112	Protein
CC	GO:1990204	Oxidoreductase complex	53/677	128/19886	7.21124e-44	8.99603e-42	7.72362e-42	BCKDHA/BCKDHB/BCS1L/CBR4/DBT/DLAT/DLD/DLST/ETFA/ETFB/GCSH/HSD17B8/IDH3A/IDH3B/IDH3G/MRPS36/MTARC1/NDUFA10/NDUFA11/NDUFA12/NDUFA13/NDUFA5/NDUFA6/NDUFA7/NDUFA9/NDUFAB1/NDUFB10/NDUFB11/NDUFB3/NDUFB6/NDUFB8/NDUFB9/NDUFS1/NDUFS2/NDUFS4/NDUFS6/NDUFS8/NDUFV1/NDUFV2/OGDH/PDHA1/PDHB/PDHX/PDK1/SDHA/SDHB/UQCR10/UQCRB/UQCRC1/UQCRC2/UQCRFS1/UQCRH/UQCRQ	53	Protein
CC	GO:0070469	Respirasome	44/677	102/19886	1.57889e-37	1.57573e-35	1.35286e-35	BCS1L/COA6/COX4I1/COX5A/COX5B/COX6B1/COX6C/COX7A2/CYCS/HIGD1A/HIGD2A/NDUFA10/NDUFA11/NDUFA12/NDUFA13/NDUFA5/NDUFA6/NDUFA7/NDUFA9/NDUFAB1/NDUFB10/NDUFB11/NDUFB3/NDUFB6/NDUFB8/NDUFB9/NDUFS1/NDUFS2/NDUFS4/NDUFS6/NDUFS8/NDUFV1/NDUFV2/NNT/SDHA/SDHB/UQCC4/UQCR10/UQCRB/UQCRC1/UQCRC2/UQCRFS1/UQCRH/UQCRQ	44	Protein
CC	GO:0098800	Inner mitochondrial membrane protein complex	52/677	158/19886	4.73621e-37	3.93895e-35	3.38182e-35	AFG3L2/ATP5F1B/ATP5ME/ATP5PF/BCS1L/CHCHD6/COX4I1/COX5A/COX5B/COX6B1/COX6C/COX7A2/DNAJC19/MICOS10/MTX1/NDUFA10/NDUFA11/NDUFA12/NDUFA13/NDUFA5/NDUFA6/NDUFA7/NDUFA9/NDUFAB1/NDUFB10/NDUFB11/NDUFB3/NDUFB6/NDUFB8/NDUFB9/NDUFS1/NDUFS2/NDUFS4/NDUFS6/NDUFS8/NDUFV1/NDUFV2/SDHA/SDHB/SPG7/TIMM10/TIMM29/TIMM44/TIMM50/TIMM9/UQCR10/UQCRB/UQCRC1/UQCRC2/UQCRFS1/UQCRH/UQCRQ	52	Protein
CC	GO:0098803	Respiratory chain complex	39/677	91/19886	2.99398e-33	2.13428e-31	1.83241e-31	BCS1L/COA6/COX4I1/COX5A/COX5B/COX6B1/COX6C/COX7A2/NDUFA10/NDUFA11/NDUFA12/NDUFA13/NDUFA5/NDUFA6/NDUFA7/NDUFA9/NDUFAB1/NDUFB10/NDUFB11/NDUFB3/NDUFB6/NDUFB8/NDUFB9/NDUFS1/NDUFS2/NDUFS4/NDUFS6/NDUFS8/NDUFV1/NDUFV2/SDHA/SDHB/UQCR10/UQCRB/UQCRC1/UQCRC2/UQCRFS1/UQCRH/UQCRQ	39	Protein
CC	GO:0005746	Mitochondrial respirasome	39/677	94/19886	1.39016e-32	8.6711e-31	7.44465e-31	BCS1L/COX4I1/COX5A/COX5B/COX6B1/COX6C/COX7A2/NDUFA10/NDUFA11/NDUFA12/NDUFA13/NDUFA5/NDUFA6/NDUFA7/NDUFA9/NDUFAB1/NDUFB10/NDUFB11/NDUFB3/NDUFB6/NDUFB8/NDUFB9/NDUFS1/NDUFS2/NDUFS4/NDUFS6/NDUFS8/NDUFV1/NDUFV2/NNT/SDHA/SDHB/UQCR10/UQCRB/UQCRC1/UQCRC2/UQCRFS1/UQCRH/UQCRQ	39	Protein
CC	GO:0000313	Organellar ribosome	29/677	89/19886	4.89039e-21	2.4403e-19	2.09515e-19	CHCHD1/DAP3/MRPL1/MRPL11/MRPL13/MRPL15/MRPL19/MRPL22/MRPL23/MRPL24/MRPL27/MRPL3/MRPL32/MRPL39/MRPL40/MRPL45/MRPL47/MRPL53/MRPS14/MRPS18A/MRPS18B/MRPS2/MRPS24/MRPS26/MRPS30/MRPS7/MRPS9/NDUFA7/PTCD3	29	Protein
CC	GO:0005761	Mitochondrial ribosome	29/677	89/19886	4.89039e-21	2.4403e-19	2.09515e-19	CHCHD1/DAP3/MRPL1/MRPL11/MRPL13/MRPL15/MRPL19/MRPL22/MRPL23/MRPL24/MRPL27/MRPL3/MRPL32/MRPL39/MRPL40/MRPL45/MRPL47/MRPL53/MRPS14/MRPS18A/MRPS18B/MRPS2/MRPS24/MRPS26/MRPS30/MRPS7/MRPS9/NDUFA7/PTCD3	29	Protein
CC	GO:0005747	Mitochondrial respiratory chain complex i	22/677	49/19886	7.5998e-20	2.91715e-18	2.50455e-18	NDUFA10/NDUFA11/NDUFA12/NDUFA13/NDUFA5/NDUFA6/NDUFA7/NDUFA9/NDUFAB1/NDUFB10/NDUFB11/NDUFB3/NDUFB6/NDUFB8/NDUFB9/NDUFS1/NDUFS2/NDUFS4/NDUFS6/NDUFS8/NDUFV1/NDUFV2	22	Protein
CC	GO:0030964	Nadh dehydrogenase complex	22/677	49/19886	7.5998e-20	2.91715e-18	2.50455e-18	NDUFA10/NDUFA11/NDUFA12/NDUFA13/NDUFA5/NDUFA6/NDUFA7/NDUFA9/NDUFAB1/NDUFB10/NDUFB11/NDUFB3/NDUFB6/NDUFB8/NDUFB9/NDUFS1/NDUFS2/NDUFS4/NDUFS6/NDUFS8/NDUFV1/NDUFV2	22	Protein
CC	GO:0045271	Respiratory chain complex i	22/677	49/19886	7.5998e-20	2.91715e-18	2.50455e-18	NDUFA10/NDUFA11/NDUFA12/NDUFA13/NDUFA5/NDUFA6/NDUFA7/NDUFA9/NDUFAB1/NDUFB10/NDUFB11/NDUFB3/NDUFB6/NDUFB8/NDUFB9/NDUFS1/NDUFS2/NDUFS4/NDUFS6/NDUFS8/NDUFV1/NDUFV2	22	Protein
CC	GO:0045239	Tricarboxylic acid cycle enzyme complex	14/677	16/19886	2.77653e-19	9.89634e-18	8.49659e-18	BCKDHA/BCKDHB/DBT/DLD/DLST/FH/IDH3A/IDH3B/IDH3G/MRPS36/OGDH/SUCLA2/SUCLG1/SUCLG2	14	Protein
CC	GO:0030062	Mitochondrial tricarboxylic acid cycle enzyme complex	10/677	11/19886	2.09088e-14	6.95566e-13	5.97185e-13	BCKDHA/BCKDHB/DBT/DLD/IDH3A/IDH3B/IDH3G/MRPS36/SUCLG1/SUCLG2	10	Protein
CC	GO:0031968	Organelle outer membrane	36/677	246/19886	1.48159e-13	4.6207e-12	3.96715e-12	ACACB/ACSL1/AKAP1/ARMC10/ATAD1/BPHL/CHCHD6/CISD1/CLMN/GDAP1/GPAM/HADHB/HINT2/HK2/LPIN1/MAOA/MICOS10/MLXIP/MTARC1/MTARC2/MTCH2/MTX1/MUL1/NIPSNAP2/PIGBOS1/PLA2G2A/PSEN1/RHOT1/RTN4IP1/SLC11A2/STING1/SYNE3/TOMM22/TOMM40/TUFM/VDAC2	36	Protein
CC	GO:0019867	Outer membrane	36/677	248/19886	1.90287e-13	5.02322e-12	4.31273e-12	ACACB/ACSL1/AKAP1/ARMC10/ATAD1/BPHL/CHCHD6/CISD1/CLMN/GDAP1/GPAM/HADHB/HINT2/HK2/LPIN1/MAOA/MICOS10/MLXIP/MTARC1/MTARC2/MTCH2/MTX1/MUL1/NIPSNAP2/PIGBOS1/PLA2G2A/PSEN1/RHOT1/RTN4IP1/SLC11A2/STING1/SYNE3/TOMM22/TOMM40/TUFM/VDAC2	36	Protein
CC	GO:0000315	Organellar large ribosomal subunit	18/677	56/19886	1.91265e-13	5.02322e-12	4.31273e-12	MRPL1/MRPL11/MRPL13/MRPL15/MRPL19/MRPL22/MRPL23/MRPL24/MRPL27/MRPL3/MRPL32/MRPL39/MRPL40/MRPL45/MRPL47/MRPL53/MRPS18A/MRPS30	18	Protein
CC	GO:0005762	Mitochondrial large ribosomal subunit	18/677	56/19886	1.91265e-13	5.02322e-12	4.31273e-12	MRPL1/MRPL11/MRPL13/MRPL15/MRPL19/MRPL22/MRPL23/MRPL24/MRPL27/MRPL3/MRPL32/MRPL39/MRPL40/MRPL45/MRPL47/MRPL53/MRPS18A/MRPS30	18	Protein
CC	GO:0005741	Mitochondrial outer membrane	33/677	217/19886	5.18641e-13	1.29401e-11	1.11098e-11	ACACB/ACSL1/AKAP1/ARMC10/ATAD1/BPHL/CHCHD6/CISD1/GDAP1/GPAM/HADHB/HINT2/HK2/LPIN1/MAOA/MICOS10/MLXIP/MTARC1/MTARC2/MTCH2/MTX1/MUL1/NIPSNAP2/PIGBOS1/PLA2G2A/RHOT1/RTN4IP1/SLC11A2/STING1/TOMM22/TOMM40/TUFM/VDAC2	33	Protein
CC	GO:0044391	Ribosomal subunit	30/677	188/19886	1.6831e-12	3.99936e-11	3.43368e-11	CHCHD1/DAP3/MRPL1/MRPL11/MRPL13/MRPL15/MRPL19/MRPL22/MRPL23/MRPL24/MRPL27/MRPL3/MRPL32/MRPL39/MRPL40/MRPL45/MRPL47/MRPL53/MRPS14/MRPS18A/MRPS18B/MRPS2/MRPS24/MRPS26/MRPS30/MRPS7/MRPS9/PTCD3/RPL19/RPL26L1	30	Protein
CC	GO:0070069	Cytochrome complex	15/677	42/19886	3.44825e-12	7.82125e-11	6.71501e-11	BCS1L/COA6/COX4I1/COX5A/COX5B/COX6B1/COX6C/COX7A2/UQCR10/UQCRB/UQCRC1/UQCRC2/UQCRFS1/UQCRH/UQCRQ	15	Protein
CC	GO:0005840	Ribosome	32/677	246/19886	8.08283e-11	1.75362e-09	1.50559e-09	CHCHD1/DAP3/MRPL1/MRPL11/MRPL13/MRPL15/MRPL19/MRPL22/MRPL23/MRPL24/MRPL27/MRPL3/MRPL32/MRPL39/MRPL40/MRPL45/MRPL47/MRPL53/MRPS14/MRPS18A/MRPS18B/MRPS2/MRPS24/MRPS26/MRPS30/MRPS7/MRPS9/NDUFA7/PNPT1/PTCD3/RPL19/RPL26L1	32	Protein
CC	GO:0005758	Mitochondrial intermembrane space	18/677	79/19886	1.19205e-10	2.47847e-09	2.12791e-09	AIFM1/AK2/CLPB/COA6/CYCS/HTRA2/NDUFS1/PNPT1/PPOX/STOML2/SUOX/TIMM10/TIMM13/TIMM29/TIMM8A/TIMM8B/TIMM9/TRAP1	18	Protein
CC	GO:0031970	Organelle envelope lumen	18/677	89/19886	9.55026e-10	1.90623e-08	1.63661e-08	AIFM1/AK2/CLPB/COA6/CYCS/HTRA2/NDUFS1/PNPT1/PPOX/STOML2/SUOX/TIMM10/TIMM13/TIMM29/TIMM8A/TIMM8B/TIMM9/TRAP1	18	Protein
CC	GO:0045240	Dihydrolipoyl dehydrogenase complex	7/677	9/19886	1.74397e-09	3.34709e-08	2.87367e-08	BCKDHA/BCKDHB/DBT/DLD/DLST/MRPS36/OGDH	7	Protein
CC	GO:0015934	Large ribosomal subunit	20/677	117/19886	2.54344e-09	4.70066e-08	4.03579e-08	MRPL1/MRPL11/MRPL13/MRPL15/MRPL19/MRPL22/MRPL23/MRPL24/MRPL27/MRPL3/MRPL32/MRPL39/MRPL40/MRPL45/MRPL47/MRPL53/MRPS18A/MRPS30/RPL19/RPL26L1	20	Protein
CC	GO:0005777	Peroxisome	22/677	143/19886	3.20021e-09	5.50657e-08	4.72772e-08	ABCD2/ACOT2/ACOT8/ACOX1/ACSL1/AMACR/ATAD1/CRAT/ECH1/GDAP1/HMGCL/HSD17B4/HSDL2/IDH2/MLYCD/MTARC2/MUL1/PECR/PNPLA8/SCP2/STING1/VWA8	22	Protein
CC	GO:0042579	Microbody	22/677	143/19886	3.20021e-09	5.50657e-08	4.72772e-08	ABCD2/ACOT2/ACOT8/ACOX1/ACSL1/AMACR/ATAD1/CRAT/ECH1/GDAP1/HMGCL/HSD17B4/HSDL2/IDH2/MLYCD/MTARC2/MUL1/PECR/PNPLA8/SCP2/STING1/VWA8	22	Protein
CC	GO:0005750	Mitochondrial respiratory chain complex iii	8/677	14/19886	4.33904e-09	6.67475e-08	5.73067e-08	BCS1L/UQCR10/UQCRB/UQCRC1/UQCRC2/UQCRFS1/UQCRH/UQCRQ	8	Protein
CC	GO:0045275	Respiratory chain complex iii	8/677	14/19886	4.33904e-09	6.67475e-08	5.73067e-08	BCS1L/UQCR10/UQCRB/UQCRC1/UQCRC2/UQCRFS1/UQCRH/UQCRQ	8	Protein
CC	GO:0000314	Organellar small ribosomal subunit	11/677	32/19886	4.41416e-09	6.67475e-08	5.73067e-08	CHCHD1/DAP3/MRPS14/MRPS18A/MRPS18B/MRPS2/MRPS24/MRPS26/MRPS7/MRPS9/PTCD3	11	Protein
CC	GO:0005763	Mitochondrial small ribosomal subunit	11/677	32/19886	4.41416e-09	6.67475e-08	5.73067e-08	CHCHD1/DAP3/MRPS14/MRPS18A/MRPS18B/MRPS2/MRPS24/MRPS26/MRPS7/MRPS9/PTCD3	11	Protein
CC	GO:1990351	Transporter complex	40/677	421/19886	5.33429e-09	7.82885e-08	6.72153e-08	ABCB8/BCS1L/CLIC6/NDUFA10/NDUFA11/NDUFA12/NDUFA13/NDUFA5/NDUFA6/NDUFA7/NDUFA9/NDUFAB1/NDUFB10/NDUFB11/NDUFB3/NDUFB6/NDUFB8/NDUFB9/NDUFS1/NDUFS2/NDUFS4/NDUFS6/NDUFS8/NDUFV1/NDUFV2/PTK2B/SLC2A1/TIMM10/TIMM13/TIMM8A/TIMM8B/TIMM9/TTYH3/UQCR10/UQCRB/UQCRC1/UQCRC2/UQCRFS1/UQCRH/UQCRQ	40	Protein
CC	GO:0009295	Nucleoid	12/677	45/19886	2.25741e-08	3.12902e-07	2.68645e-07	ACADVL/ATAD3A/ATP5F1B/CPS1/DBT/ELAC2/HADHA/HADHB/HSD17B10/SSBP1/TUFM/VDAC2	12	Protein
CC	GO:0042645	Mitochondrial nucleoid	12/677	45/19886	2.25741e-08	3.12902e-07	2.68645e-07	ACADVL/ATAD3A/ATP5F1B/CPS1/DBT/ELAC2/HADHA/HADHB/HSD17B10/SSBP1/TUFM/VDAC2	12	Protein
CC	GO:0005967	Mitochondrial pyruvate dehydrogenase complex	6/677	8/19886	4.02339e-08	5.28335e-07	4.53607e-07	DLAT/DLD/PDHA1/PDHB/PDHX/PDK1	6	Protein
CC	GO:0045254	Pyruvate dehydrogenase complex	6/677	8/19886	4.02339e-08	5.28335e-07	4.53607e-07	DLAT/DLD/PDHA1/PDHB/PDHX/PDK1	6	Protein
CC	GO:0045277	Respiratory chain complex iv	9/677	28/19886	2.25146e-07	2.88071e-06	2.47326e-06	COA6/COX4I1/COX5A/COX5B/COX6B1/COX6C/COX7A2/UQCRC2/UQCRFS1	9	Protein
CC	GO:0005947	Mitochondrial alpha-ketoglutarate dehydrogenase complex	5/677	6/19886	2.62868e-07	3.1993e-06	2.74679e-06	BCKDHA/BCKDHB/DBT/DLD/MRPS36	5	Protein
CC	GO:0042719	Mitochondrial intermembrane space protein transporter complex	5/677	6/19886	2.62868e-07	3.1993e-06	2.74679e-06	TIMM10/TIMM13/TIMM8A/TIMM8B/TIMM9	5	Protein
CC	GO:1902495	Transmembrane transporter complex	34/677	394/19886	7.30944e-07	8.68431e-06	7.456e-06	ABCB8/BCS1L/CLIC6/NDUFA10/NDUFA11/NDUFA12/NDUFA13/NDUFA5/NDUFA6/NDUFA7/NDUFA9/NDUFAB1/NDUFB10/NDUFB11/NDUFB3/NDUFB6/NDUFB8/NDUFB9/NDUFS1/NDUFS2/NDUFS4/NDUFS6/NDUFS8/NDUFV1/NDUFV2/PTK2B/TTYH3/UQCR10/UQCRB/UQCRC1/UQCRC2/UQCRFS1/UQCRH/UQCRQ	34	Protein
CC	GO:0005751	Mitochondrial respiratory chain complex iv	8/677	25/19886	1.12039e-06	1.30017e-05	1.11627e-05	COX4I1/COX5A/COX5B/COX6B1/COX6C/COX7A2/UQCRC2/UQCRFS1	8	Protein
CC	GO:0045252	Oxoglutarate dehydrogenase complex	4/677	5/19886	6.4787e-06	7.34743e-05	6.3082e-05	DLD/DLST/MRPS36/OGDH	4	Protein
CC	GO:0005782	Peroxisomal matrix	10/677	51/19886	7.07584e-06	7.67575e-05	6.59009e-05	ACOT2/ACOT8/ACOX1/AMACR/CRAT/ECH1/HMGCL/HSD17B4/MLYCD/SCP2	10	Protein
CC	GO:0031907	Microbody lumen	10/677	51/19886	7.07584e-06	7.67575e-05	6.59009e-05	ACOT2/ACOT8/ACOX1/AMACR/CRAT/ECH1/HMGCL/HSD17B4/MLYCD/SCP2	10	Protein
CC	GO:0062023	Collagen-containing extracellular matrix	33/677	429/19886	1.24263e-05	0.000131931	0.00011327	ADAMTS15/ADAMTS5/ADIPOQ/ANGPT1/ANGPTL2/APOE/CDH13/CLEC3B/COL11A1/COL7A1/COMP/CTSS/DPT/ECM2/EDIL3/ELN/FBLN1/FN1/GREM1/LAMA2/LOXL2/LOXL3/MMP2/MXRA5/P3H2/PLSCR1/PODN/PRG4/RARRES2/SERPINE1/SULF1/TNXB/WNT5A	33	Protein
CC	GO:0015935	Small ribosomal subunit	11/677	75/19886	4.43128e-05	0.000460668	0.000395511	CHCHD1/DAP3/MRPS14/MRPS18A/MRPS18B/MRPS2/MRPS24/MRPS26/MRPS7/MRPS9/PTCD3	11	Protein
CC	GO:1990229	Iron-sulfur cluster assembly complex	4/677	12/19886	0.00052972	0.0053945	0.0046315	FDX2/ISCU/NDUFAB1/NFS1	4	Protein
CC	GO:0005955	Calcineurin complex	3/677	6/19886	0.000727441	0.00703153	0.00603699	ITPR1/PPP3CB/PPP3CC	3	Protein
CC	GO:0099617	Matrix side of mitochondrial inner membrane	3/677	6/19886	0.000727441	0.00703153	0.00603699	BDH1/DNAJC19/NDUFAF5	3	Protein
CC	GO:0005742	Mitochondrial outer membrane translocase complex	5/677	22/19886	0.000732745	0.00703153	0.00603699	CHCHD6/MICOS10/MTX1/TOMM22/TOMM40	5	Protein
CC	GO:0098799	Outer mitochondrial membrane protein complex	5/677	23/19886	0.000910282	0.00857039	0.00735819	CHCHD6/MICOS10/MTX1/TOMM22/TOMM40	5	Protein
CC	GO:0005757	Mitochondrial permeability transition pore complex	3/677	7/19886	0.00124082	0.0112576	0.00966536	PPIF/SLC25A4/SPG7	3	Protein
CC	GO:0042721	Tim22 mitochondrial import inner membrane insertion complex	3/677	7/19886	0.00124082	0.0112576	0.00966536	TIMM10/TIMM29/TIMM9	3	Protein
CC	GO:0005778	Peroxisomal membrane	8/677	65/19886	0.00157843	0.0138182	0.0118637	ABCD2/ACOX1/ACSL1/ATAD1/GDAP1/HSD17B4/PECR/PNPLA8	8	Protein
CC	GO:0031903	Microbody membrane	8/677	65/19886	0.00157843	0.0138182	0.0118637	ABCD2/ACOX1/ACSL1/ATAD1/GDAP1/HSD17B4/PECR/PNPLA8	8	Protein
CC	GO:0046930	Pore complex	5/677	26/19886	0.00163557	0.0140325	0.0120478	PPIF/SLC25A4/SPG7/TOMM40/VDAC2	5	Protein
CC	GO:0098576	Lumenal side of membrane	6/677	38/19886	0.00165916	0.0140325	0.0120478	BDH1/DNAJC19/HLA-B/HLA-H/NDUFAF5/TAPBP	6	Protein
CC	GO:0005744	Tim23 mitochondrial import inner membrane translocase complex	4/677	16/19886	0.00174723	0.0145311	0.0124758	DNAJC19/TIMM10/TIMM44/TIMM50	4	Protein
CC	GO:0045121	Membrane raft	20/677	286/19886	0.00197731	0.016175	0.0138872	ANGPT1/BMPR2/BST2/CAVIN2/CD36/CDH13/EFNB1/F2R/PLPP3/PLSCR1/PSEN1/SCARB1/SDCBP/SLC2A1/SLC2A4/SORBS1/STOML2/SULF1/TNFRSF1A/TPP1	20	Protein
CC	GO:0098857	Membrane microdomain	20/677	287/19886	0.00205968	0.0165771	0.0142325	ANGPT1/BMPR2/BST2/CAVIN2/CD36/CDH13/EFNB1/F2R/PLPP3/PLSCR1/PSEN1/SCARB1/SDCBP/SLC2A1/SLC2A4/SORBS1/STOML2/SULF1/TNFRSF1A/TPP1	20	Protein
CC	GO:1905370	Serine-type endopeptidase complex	3/677	11/19886	0.00528224	0.0418387	0.035921	HTRA2/PLAUR/THBD	3	Protein
CC	GO:0005901	Caveola	8/677	81/19886	0.00626854	0.0488751	0.0419621	BMPR2/CAVIN2/CD36/CDH13/F2R/SCARB1/SLC2A1/SORBS1	8	Protein
MF	GO:0009055	Electron transfer activity	37/661	117/18496	2.99598e-25	2.91209e-22	2.37786e-22	AKR1B1/ALDH2/ALDH4A1/COX4I1/COX5A/COX5B/COX6B1/CYCS/ETFA/ETFB/ETFDH/FDX2/IDH3B/NDUFA10/NDUFA12/NDUFA5/NDUFA6/NDUFA7/NDUFA9/NDUFB10/NDUFB3/NDUFB6/NDUFB8/NDUFB9/NDUFS1/NDUFS2/NDUFS4/NDUFS6/NDUFS8/NDUFV1/NDUFV2/SDHA/SDHB/UQCR10/UQCRC1/UQCRFS1/UQCRH	37	Protein
MF	GO:0015453	Oxidoreduction-driven active transmembrane transporter activity	26/661	68/18496	1.58318e-20	7.69425e-18	6.28272e-18	COX4I1/COX5A/COX5B/COX6B1/NDUFA10/NDUFA12/NDUFA5/NDUFA6/NDUFA7/NDUFA9/NDUFB10/NDUFB3/NDUFB6/NDUFB8/NDUFB9/NDUFS1/NDUFS2/NDUFS4/NDUFS6/NDUFS8/NDUFV1/NDUFV2/UQCR10/UQCRC1/UQCRFS1/UQCRH	26	Protein
MF	GO:0003954	Nadh dehydrogenase activity	19/661	44/18496	1.52945e-16	4.67789e-14	3.81972e-14	AIFM1/NDUFA10/NDUFA12/NDUFA5/NDUFA6/NDUFA7/NDUFA9/NDUFB10/NDUFB3/NDUFB6/NDUFB8/NDUFB9/NDUFS1/NDUFS2/NDUFS4/NDUFS6/NDUFS8/NDUFV1/NDUFV2	19	Protein
MF	GO:0016655	Oxidoreductase activity, acting on nad(p)h, quinone or similar compound as acceptor	21/661	57/18496	1.92506e-16	4.67789e-14	3.81972e-14	CBR4/CRYZ/DCXR/NDUFA10/NDUFA12/NDUFA5/NDUFA6/NDUFA7/NDUFA9/NDUFB10/NDUFB3/NDUFB6/NDUFB8/NDUFB9/NDUFS1/NDUFS2/NDUFS4/NDUFS6/NDUFS8/NDUFV1/NDUFV2	21	Protein
MF	GO:0003955	Nad(p)h dehydrogenase (quinone) activity	19/661	45/18496	2.55984e-16	4.97632e-14	4.0634e-14	CBR4/NDUFA10/NDUFA12/NDUFA5/NDUFA6/NDUFA7/NDUFA9/NDUFB10/NDUFB3/NDUFB6/NDUFB8/NDUFB9/NDUFS1/NDUFS2/NDUFS4/NDUFS6/NDUFS8/NDUFV1/NDUFV2	19	Protein
MF	GO:0008137	Nadh dehydrogenase (ubiquinone) activity	18/661	41/18496	6.75014e-16	1.09352e-13	8.92913e-14	NDUFA10/NDUFA12/NDUFA5/NDUFA6/NDUFA7/NDUFA9/NDUFB10/NDUFB3/NDUFB6/NDUFB8/NDUFB9/NDUFS1/NDUFS2/NDUFS4/NDUFS6/NDUFS8/NDUFV1/NDUFV2	18	Protein
MF	GO:0050136	Nadh dehydrogenase (quinone) activity	18/661	42/18496	1.14237e-15	1.58627e-13	1.29526e-13	NDUFA10/NDUFA12/NDUFA5/NDUFA6/NDUFA7/NDUFA9/NDUFB10/NDUFB3/NDUFB6/NDUFB8/NDUFB9/NDUFS1/NDUFS2/NDUFS4/NDUFS6/NDUFS8/NDUFV1/NDUFV2	18	Protein
MF	GO:0016651	Oxidoreductase activity, acting on nad(p)h	24/661	87/18496	2.57552e-15	3.12926e-13	2.55519e-13	AIFM1/CBR4/CRYZ/CYB5R1/DCXR/NDUFA10/NDUFA12/NDUFA5/NDUFA6/NDUFA7/NDUFA9/NDUFB10/NDUFB3/NDUFB6/NDUFB8/NDUFB9/NDUFS1/NDUFS2/NDUFS4/NDUFS6/NDUFS8/NDUFV1/NDUFV2/NNT	24	Protein
MF	GO:0015399	Primary active transmembrane transporter activity	32/661	164/18496	3.16594e-15	3.41922e-13	2.79195e-13	ABCB10/ABCB7/ABCB8/ABCD2/ATP5F1B/ATP6V1G2/COX4I1/COX5A/COX5B/COX6B1/NDUFA10/NDUFA12/NDUFA5/NDUFA6/NDUFA7/NDUFA9/NDUFB10/NDUFB3/NDUFB6/NDUFB8/NDUFB9/NDUFS1/NDUFS2/NDUFS4/NDUFS6/NDUFS8/NDUFV1/NDUFV2/UQCR10/UQCRC1/UQCRFS1/UQCRH	32	Protein
MF	GO:0016903	Oxidoreductase activity, acting on the aldehyde or oxo group of donors	18/661	48/18496	1.93128e-14	1.8772e-12	1.53283e-12	AKR1B1/ALDH1L1/ALDH1L2/ALDH2/ALDH4A1/ALDH5A1/ALDH6A1/AOX1/BCKDHA/BCKDHB/DHTKD1/DLAT/DLD/MRPS36/OGDH/PDHA1/PDHB/PDHX	18	Protein
MF	GO:0051536	Iron-sulfur cluster binding	20/661	70/18496	2.63631e-13	2.13541e-11	1.74367e-11	ACO2/AOX1/CISD1/ETFDH/FDX2/FECH/IREB2/ISCU/MOCS1/NDUFS1/NDUFS2/NDUFS8/NDUFV1/NDUFV2/NFS1/NFU1/NUBPL/REV3L/SDHB/UQCRFS1	20	Protein
MF	GO:0051540	Metal cluster binding	20/661	70/18496	2.63631e-13	2.13541e-11	1.74367e-11	ACO2/AOX1/CISD1/ETFDH/FDX2/FECH/IREB2/ISCU/MOCS1/NDUFS1/NDUFS2/NDUFS8/NDUFV1/NDUFV2/NFS1/NFU1/NUBPL/REV3L/SDHB/UQCRFS1	20	Protein
MF	GO:0050660	Flavin adenine dinucleotide binding	22/661	88/18496	3.45565e-13	2.58376e-11	2.10976e-11	ACAD10/ACAD8/ACADM/ACADS/ACADSB/ACADVL/ACOX1/AIFM1/AOX1/CYB5R1/D2HGDH/DLD/ETFA/ETFDH/GCDH/IVD/KDM1A/LDHD/MAOA/PPOX/QSOX1/SDHA	22	Protein
MF	GO:0016627	Oxidoreductase activity, acting on the ch-ch group of donors	18/661	60/18496	1.63569e-12	1.13563e-10	9.27299e-11	ACAD10/ACAD8/ACADM/ACADS/ACADSB/ACADVL/ACOX1/BLVRB/CRAT/DECR1/FASN/GCDH/IVD/PECR/PPOX/PTGES2/SDHA/SDHB	18	Protein
MF	GO:0022804	Active transmembrane transporter activity	47/661	454/18496	6.22086e-11	4.03111e-09	3.2916e-09	ABCB10/ABCB7/ABCB8/ABCD2/ATP5F1B/ATP6V1G2/COX4I1/COX5A/COX5B/COX6B1/LETM1/NDUFA10/NDUFA12/NDUFA5/NDUFA6/NDUFA7/NDUFA9/NDUFB10/NDUFB3/NDUFB6/NDUFB8/NDUFB9/NDUFS1/NDUFS2/NDUFS4/NDUFS6/NDUFS8/NDUFV1/NDUFV2/SLC11A2/SLC16A3/SLC25A1/SLC25A10/SLC25A11/SLC25A12/SLC25A18/SLC25A22/SLC25A4/SLC2A10/SLC2A4/SLC4A7/SLC5A6/TMCO3/UQCR10/UQCRC1/UQCRFS1/UQCRH	47	Protein
MF	GO:0016614	Oxidoreductase activity, acting on ch-oh group of donors	24/661	135/18496	7.35679e-11	4.46925e-09	3.64936e-09	ADH1B/AKR1B1/BDH1/CBR4/D2HGDH/DCXR/FASN/HADH/HADHA/HADHB/HIBADH/HSD17B10/HSD17B4/HSD17B8/IDH2/IDH3A/IDH3B/IDH3G/LDHD/MDH2/ME3/RDH10/RDH13/SPR	24	Protein
MF	GO:0016616	Oxidoreductase activity, acting on the ch-oh group of donors, nad or nadp as acceptor	23/661	125/18496	8.89315e-11	5.08479e-09	4.15197e-09	ADH1B/AKR1B1/BDH1/CBR4/DCXR/FASN/HADH/HADHA/HADHB/HIBADH/HSD17B10/HSD17B4/HSD17B8/IDH2/IDH3A/IDH3B/IDH3G/LDHD/MDH2/ME3/RDH10/RDH13/SPR	23	Protein
MF	GO:0051287	Nad binding	15/661	53/18496	2.99757e-10	1.61869e-08	1.32173e-08	ALDH2/AOX1/GLUD1/HADH/HADHA/HIBADH/HSD17B8/IDH2/IDH3A/IDH3B/IDH3G/ME3/NDUFS2/NDUFV1/NNT	15	Protein
MF	GO:0016620	Oxidoreductase activity, acting on the aldehyde or oxo group of donors, nad or nadp as acceptor	13/661	39/18496	4.7582e-10	2.43419e-08	1.98763e-08	AKR1B1/ALDH1L1/ALDH1L2/ALDH2/ALDH4A1/ALDH5A1/ALDH6A1/DLAT/DLD/OGDH/PDHA1/PDHB/PDHX	13	Protein
MF	GO:0019842	Vitamin binding	24/661	150/18496	7.01246e-10	3.40806e-08	2.78284e-08	ACACB/ALAS1/CISD1/CRABP2/DHTKD1/FASN/GCAT/GPT2/MCCC1/MMAB/MMUT/MTARC1/MTARC2/MTHFS/NFS1/OGDH/OGFOD1/P3H2/PC/PCCA/PLOD2/RBP4/SHMT1/THNSL2	24	Protein
MF	GO:0003995	Acyl-coa dehydrogenase activity	8/661	12/18496	1.11276e-09	4.8532e-08	3.96287e-08	ACAD10/ACAD8/ACADM/ACADS/ACADSB/ACADVL/GCDH/IVD	8	Protein
MF	GO:0052890	Oxidoreductase activity, acting on the ch-ch group of donors, with a flavin as acceptor	8/661	12/18496	1.11276e-09	4.8532e-08	3.96287e-08	ACAD10/ACAD8/ACADM/ACADS/ACADSB/ACADVL/GCDH/IVD	8	Protein
MF	GO:0016874	Ligase activity	25/661	166/18496	1.14839e-09	4.8532e-08	3.96287e-08	ACACB/ACSF2/ACSF3/ACSL1/ACSS1/ACSS3/ATP5F1B/ATP5ME/ATP5PF/CPS1/DARS2/GHDC/GLUL/IARS2/LARS2/MCCC1/MCCC2/MTHFS/PC/PCCA/PCCB/SUCLA2/SUCLG1/SUCLG2/WARS2	25	Protein
MF	GO:0016624	Oxidoreductase activity, acting on the aldehyde or oxo group of donors, disulfide as acceptor	7/661	9/18496	2.44071e-09	9.88487e-08	8.07147e-08	BCKDHA/BCKDHB/DHTKD1/MRPS36/OGDH/PDHA1/PDHB	7	Protein
MF	GO:0015078	Proton transmembrane transporter activity	22/661	142/18496	6.66776e-09	2.59243e-07	2.11684e-07	ATP5F1B/ATP5ME/ATP5PF/ATP6V1G2/COX4I1/COX5A/COX5B/COX6B1/LETM1/NNT/SLC11A2/SLC16A3/SLC25A12/SLC25A18/SLC25A22/SLC25A4/SLC2A10/TMCO3/UQCR10/UQCRC1/UQCRFS1/UQCRH	22	Protein
MF	GO:0016885	Ligase activity, forming carbon-carbon bonds	6/661	7/18496	1.38331e-08	5.17143e-07	4.22272e-07	ACACB/MCCC1/MCCC2/PC/PCCA/PCCB	6	Protein
MF	GO:0003735	Structural constituent of ribosome	24/661	176/18496	1.83449e-08	6.60415e-07	5.3926e-07	DAP3/MRPL1/MRPL11/MRPL13/MRPL15/MRPL19/MRPL22/MRPL23/MRPL24/MRPL27/MRPL3/MRPL32/MRPL47/MRPS14/MRPS18A/MRPS18B/MRPS2/MRPS24/MRPS30/MRPS7/MRPS9/NDUFA7/RPL19/RPL26L1	24	Protein
MF	GO:0051539	4 iron, 4 sulfur cluster binding	12/661	43/18496	2.18121e-08	7.57191e-07	6.18283e-07	ACO2/ETFDH/IREB2/MOCS1/NDUFS1/NDUFS2/NDUFS8/NDUFV1/NFU1/NUBPL/REV3L/SDHB	12	Protein
MF	GO:0016829	Lyase activity	25/661	196/18496	3.61564e-08	1.21186e-06	9.89544e-07	ACO2/ADCY3/AUH/BCKDHA/CA5B/CENPV/CLYBL/DGLUCY/ECHS1/ENO2/FAHD1/FASN/FECH/FH/HADHA/HADHB/HMGCL/HSD17B4/IREB2/ME3/MLYCD/MOCS1/NPR1/PCK1/PTGES2	25	Protein
MF	GO:0051537	2 iron, 2 sulfur cluster binding	9/661	25/18496	1.1011e-07	3.56755e-06	2.91307e-06	AOX1/CISD1/FDX2/FECH/ISCU/NDUFS1/NDUFV2/SDHB/UQCRFS1	9	Protein
MF	GO:0004738	Pyruvate dehydrogenase activity	5/661	6/18496	3.34492e-07	9.56254e-06	7.80827e-06	DLAT/DLD/PDHA1/PDHB/PDHX	5	Protein
MF	GO:0016421	Coa carboxylase activity	5/661	6/18496	3.34492e-07	9.56254e-06	7.80827e-06	ACACB/MCCC1/MCCC2/PCCA/PCCB	5	Protein
MF	GO:0034603	Pyruvate dehydrogenase [nad(p)+] activity	5/661	6/18496	3.34492e-07	9.56254e-06	7.80827e-06	DLAT/DLD/PDHA1/PDHB/PDHX	5	Protein
MF	GO:0034604	Pyruvate dehydrogenase (nad+) activity	5/661	6/18496	3.34492e-07	9.56254e-06	7.80827e-06	DLAT/DLD/PDHA1/PDHB/PDHX	5	Protein
MF	GO:0031406	Carboxylic acid binding	23/661	195/18496	5.2639e-07	1.46186e-05	1.19368e-05	ACACB/ACOX1/ADIPOQ/CD36/COL11A1/CPS1/CRABP2/DBT/DDAH2/GLUD1/GLUD2/MCCC1/MTHFS/NDUFAB1/OGFOD1/P3H2/PC/PCCA/PCK1/PLOD2/SCP2/SHMT1/THNSL2	23	Protein
MF	GO:1901681	Sulfur compound binding	28/661	275/18496	6.80454e-07	1.83722e-05	1.50018e-05	ACACB/ACADVL/ADAMTS15/ADAMTS5/APOE/CCN4/CLEC3B/COL11A1/COMP/CXCL6/DBT/DHTKD1/DPYSL3/ECM2/FGF2/FN1/GCDH/HADHA/MCCC1/MOCS1/OGDH/PC/PCCA/SCP2/SLIT3/TF/TNXB/TPMT	28	Protein
MF	GO:0003857	3-hydroxyacyl-coa dehydrogenase activity	5/661	7/18496	1.13614e-06	2.83161e-05	2.31214e-05	HADH/HADHA/HADHB/HSD17B10/HSD17B4	5	Protein
MF	GO:0003988	Acetyl-coa c-acyltransferase activity	5/661	7/18496	1.13614e-06	2.83161e-05	2.31214e-05	ACAA2/ACAT1/HADHA/HADHB/SCP2	5	Protein
MF	GO:0016453	C-acetyltransferase activity	5/661	7/18496	1.13614e-06	2.83161e-05	2.31214e-05	ACAA2/ACAT1/GCAT/HADHA/HADHB	5	Protein
MF	GO:0016836	Hydro-lyase activity	12/661	61/18496	1.3745e-06	3.34003e-05	2.7273e-05	ACO2/AUH/CA5B/DGLUCY/ECHS1/ENO2/FASN/FH/HADHA/HADHB/HSD17B4/IREB2	12	Protein
MF	GO:0043177	Organic acid binding	23/661	207/18496	1.50858e-06	3.57644e-05	2.92033e-05	ACACB/ACOX1/ADIPOQ/CD36/COL11A1/CPS1/CRABP2/DBT/DDAH2/GLUD1/GLUD2/MCCC1/MTHFS/NDUFAB1/OGFOD1/P3H2/PC/PCCA/PCK1/PLOD2/SCP2/SHMT1/THNSL2	23	Protein
MF	GO:0004448	Isocitrate dehydrogenase [nad(p)+] activity	4/661	5/18496	7.85477e-06	0.000177554	0.000144982	IDH2/IDH3A/IDH3B/IDH3G	4	Protein
MF	GO:0009374	Biotin binding	4/661	5/18496	7.85477e-06	0.000177554	0.000144982	ACACB/MCCC1/PC/PCCA	4	Protein
MF	GO:0016790	Thiolester hydrolase activity	9/661	40/18496	9.11545e-06	0.000201369	0.000164427	ABCD2/ABHD10/ACAA2/ACOT13/ACOT2/ACOT8/ACOT9/FASN/HIBCH	9	Protein
MF	GO:0016878	Acid-thiol ligase activity	8/661	31/18496	9.70241e-06	0.000209572	0.000171126	ACSF2/ACSF3/ACSL1/ACSS1/ACSS3/SUCLA2/SUCLG1/SUCLG2	8	Protein
MF	GO:0016289	Coa hydrolase activity	7/661	24/18496	1.46722e-05	0.00031003	0.000253154	ABCD2/ACAA2/ACOT13/ACOT2/ACOT8/ACOT9/HIBCH	7	Protein
MF	GO:0016835	Carbon-oxygen lyase activity	12/661	77/18496	1.72069e-05	0.000355853	0.000290571	ACO2/AUH/CA5B/DGLUCY/ECHS1/ENO2/FASN/FH/HADHA/HADHB/HSD17B4/IREB2	12	Protein
MF	GO:0003985	Acetyl-coa c-acetyltransferase activity	4/661	6/18496	2.28953e-05	0.000454169	0.00037085	ACAA2/ACAT1/HADHA/HADHB	4	Protein
MF	GO:0043546	Molybdopterin cofactor binding	4/661	6/18496	2.28953e-05	0.000454169	0.00037085	AOX1/MTARC1/MTARC2/SUOX	4	Protein
MF	GO:0004300	Enoyl-coa hydratase activity	5/661	12/18496	3.68972e-05	0.000717281	0.000585694	AUH/ECHS1/HADHA/HADHB/HSD17B4	5	Protein
MF	GO:0016408	C-acyltransferase activity	6/661	20/18496	5.13909e-05	0.000970272	0.000792274	ACAA2/ACAT1/GCAT/HADHA/HADHB/SCP2	6	Protein
MF	GO:0008121	Ubiquinol-cytochrome-c reductase activity	4/661	7/18496	5.19076e-05	0.000970272	0.000792274	UQCR10/UQCRC1/UQCRFS1/UQCRH	4	Protein
MF	GO:0016877	Ligase activity, forming carbon-sulfur bonds	8/661	41/18496	8.57155e-05	0.00157199	0.0012836	ACSF2/ACSF3/ACSL1/ACSS1/ACSS3/SUCLA2/SUCLG1/SUCLG2	8	Protein
MF	GO:0052689	Carboxylic ester hydrolase activity	16/661	153/18496	0.000120227	0.00215831	0.00176236	ABHD10/ABHD15/ABHD2/ACOT2/ACOT8/ACOT9/ALDH2/BPHL/IARS2/LARS2/MGLL/PLA2G2A/PNPLA2/PNPLA8/PPME1/PTRH1	16	Protein
MF	GO:0047617	Acyl-coa hydrolase activity	6/661	23/18496	0.000122127	0.00215831	0.00176236	ABCD2/ACAA2/ACOT13/ACOT2/ACOT8/ACOT9	6	Protein
MF	GO:0015556	C4-dicarboxylate transmembrane transporter activity	5/661	15/18496	0.000127936	0.0022138	0.00180767	SLC25A10/SLC25A11/SLC25A12/SLC25A18/SLC25A22	5	Protein
MF	GO:0005178	Integrin binding	16/661	154/18496	0.000129822	0.0022138	0.00180767	ADAMTS5/CCN4/COMP/ECM2/EDIL3/FBLN1/FGF2/FN1/GFRA1/ISG15/ITGA11/ITGA6/ITGB3/LCP1/PLPP3/TNXB	16	Protein
MF	GO:0030170	Pyridoxal phosphate binding	9/661	56/18496	0.000151704	0.00254234	0.00207594	ALAS1/CISD1/GCAT/GPT2/MTARC1/MTARC2/NFS1/SHMT1/THNSL2	9	Protein
MF	GO:0000287	Magnesium ion binding	20/661	224/18496	0.000164996	0.00271825	0.00221958	CLYBL/DIS3L2/DUT/ENO2/HMGCL/IDH2/IDH3A/IDH3B/IDH3G/IRAK4/PCK1/PKLR/PLSCR1/PPA2/PRPS1/PRPS2/STK3/SUCLA2/SUCLG2/TREX1	20	Protein
MF	GO:0070279	Vitamin b6 binding	9/661	57/18496	0.000174517	0.0027661	0.00225865	ALAS1/CISD1/GCAT/GPT2/MTARC1/MTARC2/NFS1/SHMT1/THNSL2	9	Protein
MF	GO:0016679	Oxidoreductase activity, acting on diphenols and related substances as donors	4/661	9/18496	0.000176438	0.0027661	0.00225865	UQCR10/UQCRC1/UQCRFS1/UQCRH	4	Protein
MF	GO:0097177	Mitochondrial ribosome binding	4/661	9/18496	0.000176438	0.0027661	0.00225865	C1QBP/NDUFAB1/OXA1L/TACO1	4	Protein
MF	GO:0016290	Palmitoyl-coa hydrolase activity	5/661	17/18496	0.000248403	0.00377262	0.00308053	ACAA2/ACOT13/ACOT2/ACOT8/ACOT9	5	Protein
MF	GO:0032977	Membrane insertase activity	5/661	17/18496	0.000248403	0.00377262	0.00308053	EMC10/MTCH2/OXA1L/TIMM10/TIMM9	5	Protein
MF	GO:0016830	Carbon-carbon lyase activity	8/661	50/18496	0.000362995	0.00542816	0.00443235	BCKDHA/CLYBL/FAHD1/HMGCL/ME3/MLYCD/MOCS1/PCK1	8	Protein
MF	GO:0032552	Deoxyribonucleotide binding	3/661	5/18496	0.000430522	0.00634041	0.00517725	DUT/SAMHD1/TREX1	3	Protein
MF	GO:0001968	Fibronectin binding	6/661	29/18496	0.000478745	0.00687391	0.00561288	CTSS/FBLN1/IGFBP6/ITGB3/LOXL3/MMP2	6	Protein
MF	GO:0071949	Fad binding	7/661	40/18496	0.000480891	0.00687391	0.00561288	ACOX1/AIFM1/AOX1/CYB5R1/D2HGDH/LDHD/QSOX1	7	Protein
MF	GO:0033293	Monocarboxylic acid binding	10/661	79/18496	0.000495253	0.0069766	0.00569673	ACACB/ACOX1/CD36/CRABP2/DBT/MCCC1/NDUFAB1/PC/PCCA/SCP2	10	Protein
MF	GO:0022853	Active monoatomic ion transmembrane transporter activity	20/661	244/18496	0.000506182	0.00702869	0.00573926	ATP5F1B/ATP6V1G2/COX4I1/COX5A/COX5B/COX6B1/LETM1/SLC11A2/SLC16A3/SLC25A12/SLC25A18/SLC25A22/SLC2A10/SLC4A7/SLC5A6/TMCO3/UQCR10/UQCRC1/UQCRFS1/UQCRH	20	Protein
MF	GO:0004222	Metalloendopeptidase activity	12/661	110/18496	0.000564757	0.00758119	0.0061904	ADAMTS15/ADAMTS5/AFG3L2/MIPEP/MMP2/OMA1/PAPPA/PITRM1/PMPCA/PMPCB/SPG7/UQCRC2	12	Protein
MF	GO:0016638	Oxidoreductase activity, acting on the ch-nh2 group of donors	5/661	20/18496	0.000569369	0.00758119	0.0061904	GLUD1/GLUD2/LOXL2/LOXL3/MAOA	5	Protein
MF	GO:0036122	Bmp binding	5/661	20/18496	0.000569369	0.00758119	0.0061904	BMPR2/COMP/ENG/GREM1/SCUBE3	5	Protein
MF	GO:0071813	Lipoprotein particle binding	6/661	31/18496	0.000698345	0.00900251	0.00735098	APOE/CD36/CDH13/HSPD1/SCARB1/VLDLR	6	Protein
MF	GO:0071814	Protein-lipid complex binding	6/661	31/18496	0.000698345	0.00900251	0.00735098	APOE/CD36/CDH13/HSPD1/SCARB1/VLDLR	6	Protein
MF	GO:0050840	Extracellular matrix binding	8/661	55/18496	0.0007039	0.00900251	0.00735098	ADAMTS15/ADAMTS5/CD248/COL11A1/CTSS/ELN/ITGA6/ITGB3	8	Protein
MF	GO:0005201	Extracellular matrix structural constituent	15/661	166/18496	0.000923684	0.01166	0.00952096	ADIPOQ/COL11A1/COL7A1/COMP/DPT/EDIL3/ELN/FBLN1/FN1/LAMA2/MXRA5/PODN/PRG4/TFPI2/TNXB	15	Protein
MF	GO:0005539	Glycosaminoglycan binding	19/661	240/18496	0.00104964	0.0130802	0.0106806	ADAMTS15/ADAMTS5/APOE/C1QBP/CCN4/CEMIP/CLEC3B/COL11A1/COMP/CXCL6/DPYSL3/ECM2/ENG/FGF2/FN1/LAYN/SLIT3/SULF1/TNXB	19	Protein
MF	GO:0016747	Acyltransferase activity, transferring groups other than amino-acyl groups	18/661	225/18496	0.00124946	0.0153731	0.0125528	ACAA2/ACAT1/ALAS1/CPT2/CRAT/DBT/DLAT/DLST/FASN/GCAT/GLUL/GPAM/HADHA/HADHB/MCAT/OSGEPL1/PNPLA2/SCP2	18	Protein
MF	GO:0015295	Solute:proton symporter activity	5/661	24/18496	0.00138677	0.0168493	0.0137583	SLC11A2/SLC16A3/SLC25A18/SLC25A22/SLC2A10	5	Protein
MF	GO:0004176	Atp-dependent peptidase activity	3/661	7/18496	0.00142783	0.0171339	0.0139907	AFG3L2/CLPP/SPG7	3	Protein
MF	GO:0004029	Aldehyde dehydrogenase (nad+) activity	4/661	15/18496	0.00161029	0.0186334	0.015215	ALDH1L1/ALDH1L2/ALDH2/ALDH4A1	4	Protein
MF	GO:0031005	Filamin binding	4/661	15/18496	0.00161029	0.0186334	0.015215	DPYSL3/DPYSL4/HSPB7/RFLNB	4	Protein
MF	GO:0102991	Myristoyl-coa hydrolase activity	4/661	15/18496	0.00161029	0.0186334	0.015215	ACAA2/ACOT13/ACOT2/ACOT8	4	Protein
MF	GO:0008483	Transaminase activity	5/661	25/18496	0.00168307	0.0192464	0.0157156	BCAT1/BCAT2/CISD1/GFPT2/GPT2	5	Protein
MF	GO:0016769	Transferase activity, transferring nitrogenous groups	5/661	26/18496	0.00202328	0.0227912	0.0186101	BCAT1/BCAT2/CISD1/GFPT2/GPT2	5	Protein
MF	GO:0004129	Cytochrome-c oxidase activity	4/661	16/18496	0.00208685	0.0227912	0.0186101	COX4I1/COX5A/COX5B/COX6B1	4	Protein
MF	GO:0016675	Oxidoreductase activity, acting on a heme group of donors	4/661	16/18496	0.00208685	0.0227912	0.0186101	COX4I1/COX5A/COX5B/COX6B1	4	Protein
MF	GO:0048038	Quinone binding	4/661	16/18496	0.00208685	0.0227912	0.0186101	CBR4/ETFDH/NDUFS2/SDHB	4	Protein
MF	GO:0016405	Coa-ligase activity	5/661	27/18496	0.00241106	0.0260395	0.0212625	ACSF2/ACSF3/ACSL1/ACSS1/ACSS3	5	Protein
MF	GO:0000062	Fatty-acyl-coa binding	4/661	17/18496	0.00265252	0.0278463	0.0227379	ACADVL/GCDH/HADHA/SCP2	4	Protein
MF	GO:0004030	Aldehyde dehydrogenase [nad(p)+] activity	4/661	17/18496	0.00265252	0.0278463	0.0227379	ALDH1L1/ALDH1L2/ALDH2/ALDH4A1	4	Protein
MF	GO:0050661	Nadp binding	7/661	53/18496	0.00266431	0.0278463	0.0227379	CBR4/CRYZ/DECR1/HIBADH/ME3/NNT/SPR	7	Protein
MF	GO:0008237	Metallopeptidase activity	15/661	185/18496	0.0027066	0.0279874	0.022853	ADAMTS15/ADAMTS5/AFG3L2/CPM/METAP1D/MIPEP/MMP2/OMA1/PAPPA/PITRM1/PMPCA/PMPCB/SPG7/UQCRC2/XPNPEP3	15	Protein
MF	GO:0008514	Organic anion transmembrane transporter activity	18/661	242/18496	0.00278846	0.0285304	0.0232964	CD36/MFSD10/SFXN1/SFXN3/SLC16A3/SLC25A1/SLC25A10/SLC25A11/SLC25A12/SLC25A18/SLC25A22/SLC25A4/SLC2A1/SLC2A10/SLC43A3/SLC4A7/SLC5A6/SLC7A1	18	Protein
MF	GO:0016645	Oxidoreductase activity, acting on the ch-nh group of donors	5/661	28/18496	0.00285012	0.0288574	0.0235635	AASS/ALDH1L1/ALDH1L2/BLVRB/ETFDH	5	Protein
MF	GO:0072341	Modified amino acid binding	9/661	84/18496	0.00304451	0.0305079	0.0249112	CAVIN2/CPS1/FASN/GAS6/GSDMA/MMUT/MTHFS/SCARB1/SYTL2	9	Protein
MF	GO:0015183	L-aspartate transmembrane transporter activity	3/661	9/18496	0.00324778	0.0322127	0.0263032	SLC25A12/SLC25A18/SLC25A22	3	Protein
MF	GO:0016646	Oxidoreductase activity, acting on the ch-nh group of donors, nad or nadp as acceptor	4/661	18/18496	0.00331499	0.0322217	0.0263106	AASS/ALDH1L1/ALDH1L2/BLVRB	4	Protein
MF	GO:1901567	Fatty acid derivative binding	4/661	18/18496	0.00331499	0.0322217	0.0263106	ACADVL/GCDH/HADHA/SCP2	4	Protein
MF	GO:0005506	Iron ion binding	13/661	153/18496	0.00339272	0.0326507	0.0266609	ACO2/AOX1/CYP2U1/CYP7B1/FECH/ISCU/KDM3A/NFU1/OGFOD1/P3H2/PLOD2/SCD/TF	13	Protein
MF	GO:0016417	S-acyltransferase activity	5/661	30/18496	0.00389688	0.0371349	0.0303224	DLAT/DLST/FASN/GLUL/MCAT	5	Protein
MF	GO:0019205	Nucleobase-containing compound kinase activity	6/661	43/18496	0.00402466	0.0379803	0.0310127	AK2/AK3/CMPK2/NME3/TJP2/TK2	6	Protein
MF	GO:0003725	Double-stranded rna binding	8/661	73/18496	0.00443685	0.041035	0.033507	DDX60/DDX60L/HSPD1/OAS1/OAS2/OAS3/OASL/RIGI	8	Protein
MF	GO:0016853	Isomerase activity	13/661	158/18496	0.00446252	0.041035	0.033507	AMACR/ECH1/ECHS1/FBH1/FKBP5/HSD17B4/HSPD1/ITGB3/MMUT/PPIF/PTGES2/QSOX1/RPE	13	Protein
MF	GO:0005310	Dicarboxylic acid transmembrane transporter activity	5/661	31/18496	0.00451198	0.041035	0.033507	SLC25A10/SLC25A11/SLC25A12/SLC25A18/SLC25A22	5	Protein
MF	GO:0016634	Oxidoreductase activity, acting on the ch-ch group of donors, oxygen as acceptor	3/661	10/18496	0.00451722	0.041035	0.033507	ACOX1/CRAT/PPOX	3	Protein
MF	GO:0120227	Acyl-coa binding	4/661	20/18496	0.00495977	0.0446379	0.036449	ACADVL/GCDH/HADHA/SCP2	4	Protein
MF	GO:0016628	Oxidoreductase activity, acting on the ch-ch group of donors, nad or nadp as acceptor	5/661	32/18496	0.00519312	0.0463093	0.0378137	BLVRB/DECR1/FASN/PECR/PTGES2	5	Protein

## Sheet: Fig._3d
Figure 3d
KEGG ID	Description	setSize	enrichmentScore	NES	pvalue	p.adjust	qvalue	core_enrichment	From
hsa03082	ATP-dependent chromatin remodeling	47	0.498422	1.749	0.00242445	0.0218086	0.0174223	MORF4L2/SMARCE1/ACTG1/PBRM1/RSF1/SMARCA1/SMARCA2/MACROH2A2/ARID1A/MTA1/PHF6/HDAC2/SMARCB1/SMARCC2/SMARCC1/DMAP1/UCHL5/ARID2/GATAD2A	protein
hsa05202	Transcriptional misregulation in cancer	43	0.493968	1.69328	0.0026109	0.0219316	0.0175205	RUNX1/RUNX2/IGFBP3/CDK14/ARNT2/REL/ATM/BMP2K/NFKB1/HDAC2/BMI1/CCNT2/FUT8/FUS/HMGA2/CCNT1/PML/CD40	protein
hsa04141	Protein processing in endoplasmic reticulum	109	0.409335	1.66532	0.000449114	0.0047157	0.00376724	CKAP4/LMAN1/SEC61G/HSP90AB1/SELENOS/BAG2/P4HB/ERO1A/SEC23A/UGGT2/SEC23B/HYOU1/SEC24B/CUL1/PDIA3/SEC24A/RRBP1/DNAJB11/HSP90AA1/HSP90B1/UBE2D3/PDIA4/SEC61A1/MAN1A2/UGGT1/FBXO6/NPLOC4/STT3A/SEC31A/DNAJC3/RPN2/HSPA4L/PDIA6	protein
hsa05224	Breast cancer	44	0.483244	1.65308	0.00317197	0.0253758	0.020272	FGF2/WNT5A/NFKB2/CTNNB1/FGF1/CDK6/PTEN	protein
hsa03008	Ribosome biogenesis in eukaryotes	56	0.419343	1.52373	0.00694542	0.0486179	0.0388395	GNL3/EFL1/NMD3/GNL2/GAR1/CSNK2B/RBM28/MPHOSPH10/POP1/RIOK2/GTPBP4/RPP30/LSG1/UTP6/WDR36/NAT10/RAN/BMS1/DKC1/UTP15/XPO1/XRN1/RIOK1/XRN2/WDR75/IMP4/WDR3	protein
hsa05205	Proteoglycans in cancer	99	0.366997	1.47546	0.00371586	0.0290355	0.0231957	FGF2/WNT5A/FN1/PLAUR/ITGB3/HSPG2/MMP2/VAV2/SDC4/CTNNB1/ACTG1/CASP3/THBS1/COL1A1/COL1A2	protein
hsa04936	Alcoholic liver disease	62	-0.525083	-1.58752	0.00466362	0.0348217	0.0278181	ACACA/ALDH1B1/ALDH9A1/ALDH3A2/IRAK1/TNFRSF1A/ACACB/ALDH2/ALDH7A1/LPIN1/ACADVL/FASN/MLYCD/ACOX1/ADH1B/IRAK4/SCD/ACADM	protein
hsa01240	Biosynthesis of cofactors	82	-0.508384	-1.59544	0.0018535	0.0172993	0.0138199	FECH/ALDH1B1/CMPK2/PPOX/NADK2/FLAD1/AK4/ALDH3A2/NME4/COQ5/UGDH/SHMT2/ALAS1/NME3/RDH13/MMAB/ALDH2/MTHFD2/BCAT2/SPR/CPOX/SHMT1/AK2/AK3/MOCS1/NFS1/DLD	protein
hsa03320	PPAR signaling pathway	36	-0.587254	-1.62192	0.00515255	0.037636	0.0300664	ACSL3/ACOX3/ACOX2/ACAA1/LPL/EHHADH/HMGCS1/SLC27A1/ME1/PLIN4/ADIPOQ/PLIN1/SCP2/PCK2/ACSL5/ME3/CD36/CPT2/SORBS1/ACSL1/ACOX1/PCK1/SCD/ACADM	protein
hsa04975	Fat digestion and absorption	14	-0.717773	-1.65356	0.00589431	0.0421381	0.0336629	SLC27A1/PLA2G12A/SCARB1/PLPP1/GOT2/CD36/PLA2G2A/PLPP3/ACAT1	protein
hsa04723	Retrograde endocannabinoid signaling	52	-0.751514	-2.20756	4.1011e-10	9.84265e-09	7.86302e-09	GNB4/GNB2/ITPR1/NDUFS5/NDUFA8/NDUFS7/ADCY3/NDUFS3/ITPR2/NDUFAB1/NDUFA1/NDUFB11/NDUFA9/NDUFA12/NDUFB6/NDUFB4/NDUFS8/NDUFA5/NDUFA11/NDUFA10/NDUFA6/NDUFS6/NDUFB10/NDUFB5/NDUFB8/NDUFA13/NDUFV2/NDUFB9/NDUFV1/NDUFS2/NDUFS4/NDUFS1/NDUFA7	protein
hsa05208	Chemical carcinogenesis - reactive oxygen species	127	-0.671921	-2.21016	1e-10	2.8e-09	2.23684e-09	UQCRH/SOD1/NDUFA8/NDUFS7/ATP5F1C/EPHX1/NDUFS3/UQCRQ/ATP5PB/UQCRB/SLC25A4/NDUFAB1/SLC25A6/NDUFA1/COX5A/NDUFB11/NDUFA9/ATP5PD/SDHB/NDUFA12/CAT/AKR1C3/NDUFB6/NDUFB4/VDAC1/COX4I1/UQCRC1/VDAC3/NDUFS8/NDUFA5/COX6C/COX5B/CYC1/VDAC2/NDUFA11/ATP5F1B/NDUFA10/UQCRC2/ATP5F1A/NDUFA6/NDUFS6/COX6B1/SLC25A5/NDUFB10/NDUFB5/NDUFB8/NDUFA13/NDUFV2/NDUFB9/NDUFV1/PPIF/NDUFS2/NDUFS4/ATP5PF/SDHA/UQCRFS1/NDUFS1/NDUFA7	protein
hsa05415	Diabetic cardiomyopathy	109	-0.683549	-2.21806	1e-10	2.8e-09	2.23684e-09	NDUFS5/G6PD/UQCRH/NDUFA8/NDUFS7/GSR/CAMK2D/ATP5F1C/NDUFS3/UQCRQ/ATP5PB/UQCRB/SLC25A4/NDUFAB1/SLC25A6/NDUFA1/COX5A/NDUFB11/NDUFA9/ATP5PD/SDHB/NDUFA12/NDUFB6/NDUFB4/VDAC1/CD36/COX4I1/UQCRC1/CPT2/VDAC3/NDUFS8/NDUFA5/COX6C/COX5B/CYC1/SLC2A4/VDAC2/NDUFA11/ATP5F1B/NDUFA10/UQCRC2/ATP5F1A/NDUFA6/NDUFS6/COX6B1/SLC25A5/NDUFB10/NDUFB5/NDUFB8/NDUFA13/NDUFV2/PDHA1/NDUFB9/NDUFV1/PPIF/NDUFS2/NDUFS4/ATP5PF/SDHA/…	protein
hsa04932	Non-alcoholic fatty liver disease	82	-0.715441	-2.24524	1e-10	2.8e-09	2.23684e-09	UQCRH/NDUFA8/NDUFS7/NDUFS3/UQCRQ/TNFRSF1A/UQCRB/NDUFAB1/NDUFA1/COX5A/NDUFB11/NDUFA9/SDHB/NDUFA12/NDUFB6/NDUFB4/COX4I1/UQCRC1/NDUFS8/NDUFA5/COX6C/COX5B/CYC1/NDUFA11/NDUFA10/UQCRC2/NDUFA6/NDUFS6/COX6B1/NDUFB10/NDUFB5/NDUFB8/NDUFA13/NDUFV2/CYCS/NDUFB9/NDUFV1/NDUFS2/NDUFS4/SDHA/UQCRFS1/NDUFS1/NDUFA7	protein
hsa00640	Propanoate metabolism	28	-0.847807	-2.25259	6.93542e-10	1.55353e-08	1.24108e-08	BCKDHB/ACSS2/ACACB/ACSS1/DBT/ACSS3/ALDH6A1/MLYCD/ACOX1/HIBCH/DLD/MMUT/SUCLA2/PCCA/HADHA/SUCLG2/BCKDHA/ECHS1/PCCB/SUCLG1/ACADS	protein
hsa00020	Citrate cycle (TCA cycle)	26	-0.867488	-2.26859	1e-10	2.8e-09	2.23684e-09	DLST/PCK2/FH/SDHB/IDH3G/OGDH/PDHA1/PCK1/MDH2/IDH3A/DLD/SDHA/CS/SUCLA2/IDH3B/SUCLG2/IDH2/SUCLG1/ACO2/PDHB/PC/DLAT	protein
hsa04714	Thermogenesis	125	-0.698969	-2.29682	1e-10	2.8e-09	2.23684e-09	PLIN1/NDUFS5/COA6/LIPE/UQCRH/COA4/NDUFA8/PNPLA2/NDUFS7/ATP5F1C/ADCY3/NDUFS3/UQCRQ/ATP5PB/UQCRB/ATP5ME/NDUFAB1/NDUFA1/COX5A/ACSL5/NDUFB11/NDUFA9/ATP5PD/SDHB/NDUFA12/NDUFB6/NDUFB4/COX4I1/UQCRC1/CPT2/ATP5MF/NDUFS8/NDUFAF2/NDUFA5/COX6C/COX5B/CYC1/NDUFA11/ATP5F1B/NDUFA10/UQCRC2/ATP5F1A/NDUFA6/COA3/NDUFS6/COX6B1/COX20/NDUFB10/NDUFB5/NDUFB8/ACSL1/NDUFA13/NDUFV2/NDUFB9/NDUFAF5/NDUFV1/NDUFS2/NDUFS4/ATP5PF…	protein
hsa01200	Carbon metabolism	85	-0.733739	-2.30779	1e-10	2.8e-09	2.23684e-09	DLST/RPE/ME2/SHMT2/HK1/GOT2/ACSS2/FH/SDHB/CAT/ME3/IDH3G/ACSS1/PRPS1/SHMT1/GLUD2/ALDH6A1/OGDH/ACOX1/PDHA1/HIBCH/HK2/MDH2/IDH3A/DLD/SDHA/MMUT/CS/GCSH/SUCLA2/PCCA/IDH3B/SUCLG2/CPS1/IDH2/ECHS1/GLUD1/PCCB/SUCLG1/ACO2/ACAT1/PDHB/PC/DLAT/ACADS	protein
hsa00280	Valine, leucine and isoleucine degradation	41	-0.834581	-2.35866	1e-10	2.8e-09	2.23684e-09	ACADSB/ALDH1B1/ALDH9A1/ALDH3A2/HIBADH/BCKDHB/ALDH2/BCAT2/ACAD8/ALDH7A1/ACSF3/DBT/AUH/ALDH6A1/HIBCH/HMGCL/HADHB/IVD/AOX1/DLD/MMUT/PCCA/HADHA/BCKDHA/ECHS1/HSD17B10/HADH/PCCB/ACAT1/MCCC1/OXCT1/ACAA2/MCCC2/ACADM/ACADS	protein
hsa00190	Oxidative phosphorylation	76	-0.793386	-2.47082	1e-10	2.8e-09	2.23684e-09	ATP6V1G2/NDUFS5/UQCRH/NDUFA8/NDUFS7/ATP6V0A1/ATP5F1C/NDUFS3/UQCRQ/ATP5PB/UQCRB/ATP5ME/NDUFAB1/NDUFA1/COX5A/NDUFB11/NDUFA9/ATP5PD/SDHB/NDUFA12/NDUFB6/NDUFB4/COX4I1/UQCRC1/ATP5MF/NDUFS8/NDUFA5/COX6C/COX5B/CYC1/NDUFA11/PPA2/ATP5F1B/NDUFA10/UQCRC2/ATP5F1A/NDUFA6/NDUFS6/COX6B1/NDUFB10/NDUFB5/NDUFB8/NDUFA13/NDUFV2/CYCS/NDUFB9/NDUFV1/NDUFS2/NDUFS4/ATP5PF/SDHA/UQCRFS1/NDUFS1/NDUFA7	protein

## Sheet: Fig._4b-e
	Figure 4b													Figure 4e
	Control_EC						MCM_EC							Control_EC						ACM_EC
	1	2	3	4	5		1	2	3	4	5			1	2	3	4	5		1	2	3	4	5
	Spare Respiratory Capacity	Maximal Respiration	Basal Respiration	ATP-Production Respiration	Non-mitochondrial O2 Consumption		Spare Respiratory Capacity	Maximal Respiration	Basal Respiration	ATP-Production Respiration	Non-mitochondrial O2 Consumption			Spare Respiratory Capacity	Maximal Respiration	Basal Respiration	ATP-Production Respiration	Non-mitochondrial O2 Consumption		Spare Respiratory Capacity	Maximal Respiration	Basal Respiration	ATP-Production Respiration	Non-mitochondrial O2 Consumption
	8.81	1.64	7.17	6.43	4.7		7.98	0.02	7.62	3.74	8.66			6.59	3.4	3.19	2.81	4.37		9.29	4.11	5.18	4.03	6.29
	9.36	1.81	7.55	6.89	6.22		9.13	0.36	7.4	5.93	6			10.5	7.07	3.41	2.67	4.45		10.9	7.42	3.44	6.35	6.31
	18.4	5.41	13	10.1	7.05		9.99	1.74	8.85	7.09	7.83			11	7.54	3.43	3.77	7.05		14	7.53	6.49	5.89	10.1
	12.8	1.16	11.6	9.53	7.14		6.57	0.95	7.52	5.22	7.09			7.96	5.37	2.58	3.63	7		11.6	5.59	6.05	6.5	9.75
	11.4	2.4	9.02	9.59	10.4		7.53	3.26	8.63	9.48	6.88			11.5	6.15	5.34	4.36	6.92		8.6	1.64	6.96	3.24	11.1
	11.3	2.71	8.59	7.38	8.12		8.23	1.13	7.84	7.62	7.94			8.84	3.23	5.61	4.47	5.59		7.15	3.75	3.4	5.22	5.94
	10.2	0.81	9.42	7.87	6.49		8.7	1.71	10.4	7.33	6.51			6.82	2.43	4.38	4	6.85		18.3	12.4	5.86	4.13	8.93
	12.6	1.92	9.69	7.33	11.1		5.38	0.39	4.88	8.44	6.78			9.7	5.87	3.83	4.22	6.08		10.3	6.15	4.11	5.45	6.11
	9.14	2.9	9.69	4.45	6.43		4.65	0.5	5.5	6.99	4.68			7.67	4.04	3.64	3.22	4.68		14.6	8.76	5.79	4.33	8.35
	15.1	3.09	12	8.14	10.9		5.25	0.46	4.79	7.59	3.15			9.98	6.16	3.82	3.52	4.32		8.24	3.65	4.59	3.31	5.93
	12.6	3.75	12.9	9.76	10.7		4.9	1.06	6.32	8.68	4.41			10.2	5.55	4.68	3.62	3.88		10.6	5.87	4.71	4.02	3.82
	14.4	2.01	10.6	10.8	9.24		4.69	0.24	9.82	5.44	4.28			14.8	6.67	8.14	5.84	6.02		11.7	6.2	5.53	6.81	5.09
	7.81	2.36	8.6	9.97	9.36		6.58	2.46	7.35	4.65	6.7			11.5	3.95	7.58	7.03	7.84		15.8	7.2	8.59	7.48	8
	9.84	4.56	7.83	9.3	5.86		4.68	2.55	3.62	5.1	5.38			15.8	0.77	9.59	9.69	6.97		14.6	6.19	8.43	6.82	9.26
	9.73	3.25	7.37	6.25	6.7		8.4	2.75	9.56	5.69	2.32			12.4	5.07	7.35	6	6.43		13.8	5.64	8.11	6.96	6.29
	12.3	0.42	7.74	7.29	8.58		5.46	0.75	6.89	8.72	5.3			13.6	5.15	8.45	5.87	6.25		18	10.5	7.51	3.64	9.15
	10.9	4.8	7.66	8.13	7.22		3.79	3.21	6.29	6.5	8.62			8.6	1.58	7.02	4.9	5.01		13.1	5.43	7.66	7.08	7.56
	9.58	2.08	9.16	6.97	8.61		4.89	2.99	2.43	3.48	3.46			15.7	6.95	8.79	5.36	6.04		16.8	7.41	9.41	5.35	7.16
	14.2	3.08	9.35	8.09	7.09		5.28	1.36	2.73	8.05	1.58			14.3	5.5	8.76	5.84	6.54		11.8	5.11	6.64	7.34	7.41
	14.1	11.3	12	8.15	8.17		5.37	1.74	2.62	4.13	1.08			6.31	6.23	7.45	5.36	6.86		15.1	7.12	8.01	6.28	9.86
	5.78	5.17	2.7	8.77	10.2		1.28	3.49	0.53	6.01	2.26			13.4	6.64	7.21	5.34	7.28		17.3	9.77	7.49	3.17	8.43
	17.7	1.88	6.36	11.6	3.28		5.43	0.44	2.21	4.67	2.64			15.9	0.91	9.29	6.99	6.65		19.1	10.4	8.69	7.99	8.27
	7.8	5.57	2.62	3.37	8.25		5.57	3.1	2.58	2.04	0.81			9.73	3.99	8.82	6.18	5.42		22.1	10.7	11.4	7.57	8.09
	8.68	3.74	3.11	8.5	6.89		1.68	3.08	1.03	2.82	2.29			10.7	4.37	6.7	4.86	6.14		18.1	8.48	9.64	7.18	8.78
	6.19	5.13	2.45	5.23	5.55		2.77	3.06	1.83	3.12	2.3			10.8	4.53	6.47	4.76	8.27		18.4	10.1	8.21	7.45	8.7
	8.76	4.65	3.63	1.84	3.27		5.31	1.97	2.22	0.68	1.28			12.7	7.37	8.19	7.29	7.76		18	9.16	8.85	4.25	8.23
	7.48	12.7	2.83	3.8	3		0.93	0.3	2.98	0.5	1.29			16.1	3.86	11	8.51	6.09		19.7	11.3	8.47	7.29	9.31
	19.1	8.48	6.41	2.84	5.34		5.32	6.77	1.39	2.44	2.01			12.2	8.73	8.7	6.87	8.27		21.8	11.1	10.8	6.37	7.46
	16.4	4.61	7.89	4.53	4.06		6.06	8.3	1.47	0.58	0.77			16.5	4.92	8.3	6.98	7.05		16.5	7.97	8.56	9.12	8.1
	9.44	3.67	4.83	3.78	6.54		4.45	2.7	0.07	1.05	1.84			12.2	6.17	7.74	5.41	5.58		18.2	7.95	10.3	9.66	10.3
	5.48	2.92	1.81	8.11	3.75		3.44	2.52	3.93	1.69	2.99			16.5	4.65	7.31	5.19	7.01		22.8	12.9	9.82	9.01	7.69
	6.83	11.9	3.91	6.43	5.57		0.37	3.19	5.05	0.93	2.75			12.3	3.18	10.4	7.32	6.52		16.6	9.6	6.96	7.11	9.35
	24.5	2.3	12.6	5.87	3.95		10.7	2.59	2.31	2.14	1.78			12.3	6.43	7.66	6.09	5.53		23.7	10.9	12.8	8.14	8.09
	4.57	2.16	2.26	2.93	3.95		13.3	6.74	1.96	3.24	0.45			14.5	3.66	9.07	5.8	3.79		15.8	6.42	9.34	6.56	7.96
	3.46	11.8	1.3	4.64	8.17		5.01	1.23	3.58	2.16	2.73			9.56	6.31	8.05	3.99	4.78		21.6	9.27	12.4	7.18	8.43
	17.7	1.46	5.84	11.6	1.47		4.47	2.54	1.8	1.59	4.19			17	4.04	5.9	4.82	6.12		22.4	12.4	10.1	6.3	7.78
	1.81	13.7	11.2	1.9	2.09		3.2	2.12	3.55	0.79	2.15			15.7		10.7	7.19	9.06		17.4	8.77	8.66	6.73	6.81
	25	12	7.57	1.83	8.49		4.99	1.3	5.25	0.89	2.68					11.7	7.69	8.1		15.4	5.91	9.49	8.77	6.39
	19.5	1.2	1.05	6.73	2.26		6.14		1.17	2.27	2.32									19.9	10.4	9.57		6.19
	2.25	15.2	8.27	1.13	9.48		12		1.73	2.53	1.84									17.5	6.9	10.6		10.7
	23.4	1.05	1.7	12.8	4.36		2.4		5.51	2.06	1.36									20.4	7.74	12.6		5.63
	2.75	5.69	4.64	7.02	1.15		1.28		1.89	0.35	3.61									18.8	8.9	9.88
	10.3	2.72	3.15	1.49	7.19		5.24		1.74	0.66	1.32
	5.87	6.55	5.82	9.59	1.55		4.43		1.97	5.08	1
	12.4	3.51	2.91	1.9	4.51		3.86			1.53	2.13
	6.42	2.09	1.75	5.51	3.26		3.27			0.58	0.51
	3.83	8.38	8.07	4.25	3.31					1.28	2.29
	16.5	3.87	4.59	6.17	2.72					0.36	0.45
	8.47			3.74	1.91					2.32
				2.56	7.96					2.36
				10	3.83
				5.29
	Mann-Whitney test													Mann-Whitney test
	(set P value threshold for multiple comparisons by Holm-Šídák method)													(set P value threshold for multiple comparisons by Holm-Šídák method)
			Padj.													Padj.
1	Spare Respiratory Capacity		0.000254										1	Spare Respiratory Capacity		1e-06
2	Maximal Respiration		<0,000001										2	Maximal Respiration		3.5e-05
3	Basal Respiration		0.00046										3	Basal Respiration		0.077405
4	ATP-Production Coupled Respiration		1.5e-05										4	ATP-Production Coupled Respiration		0.04026
5	Non-mitochondrial Oxygen Consumption		5e-06										5	Non-mitochondrial Oxygen Consumption		3.5e-05

## Sheet: Fig._4c-f
Figure 4c
Description	GeneRatio	BgRatio	RichFactor	FoldEnrichment	zScore	pvalue	p.adjust	qvalue	geneID	Count	From
Influenza infection	22/490	157/11290	0.140127	3.22865	5.98962	1.09478e-06	0.000975056	0.000872898	SLC25A6/RPS23/RPS26/POM121C/RPS20/KPNA3/RPL18A/KPNA2/RPL26L1/RPL19/RPS19/RPL29/POLR2F/KPNA4/RPL36A/NUP35/RPL36/RPL24/RPL27A/RPS3/RPS27/RPL3	22	Protein
Processing of capped intron containing pre mrna	31/490	283/11290	0.109541	2.52391	5.53007	1.90369e-06	0.000975056	0.000872898	RBM42/TXNL4A/PCF11/POM121C/SRSF5/SNRPD1/SNIP1/CPSF6/HTATSF1/SNU13/CHTOP/PRCC/LSM2/PCBP1/EIF4E/PPIL1/SNRPD3/SMU1/LSM6/SNRNP27/SRSF1/POLR2F/HNRNPM/NUP35/SF3A1/LSM3/SF3B4/RBM17/CHERP/SNRPC/GCFC2	31	Protein
Eukaryotic translation elongation	16/490	94/11290	0.170213	3.92184	6.05903	2.48527e-06	0.000975056	0.000872898	RPS23/RPS26/RPS20/EEF1A2/RPL18A/RPL26L1/RPL19/RPS19/RPL29/RPL36A/RPL36/RPL24/RPL27A/RPS3/RPS27/RPL3	16	Protein
Sars cov 1 host interactions	16/490	98/11290	0.163265	3.76177	5.84871	4.37238e-06	0.00122025	0.0010924	CASP1/NMI/NFKB1/IFIH1/RPS23/RPS26/SMAD4/RPS20/KPNA2/MAVS/FKBP1A/RPS19/RELA/RPS3/RPS27/SMAD3	16	Protein
mRNA splicing	25/490	212/11290	0.117925	2.71708	5.37577	5.18373e-06	0.00122025	0.0010924	RBM42/TXNL4A/SRSF5/SNRPD1/SNIP1/HTATSF1/SNU13/PRCC/LSM2/PCBP1/PPIL1/SNRPD3/SMU1/LSM6/SNRNP27/SRSF1/POLR2F/HNRNPM/SF3A1/LSM3/SF3B4/RBM17/CHERP/SNRPC/GCFC2	25	Protein
Collagen formation	15/490	90/11290	0.166667	3.84014	5.76189	6.6947e-06	0.00131328	0.00117568	COL4A1/COL8A1/COL4A2/COL5A1/COLGALT1/PLOD1/COL6A2/COL6A1/P4HA2/P3H3/LAMA3/CTSS/ITGB4/COL1A1/LOX	15	Protein
Nucleotide binding domain leucine rich repeat containing receptor nlr signaling pathways	11/490	56/11290	0.196429	4.52587	5.63388	2.32474e-05	0.00386241	0.00345774	CASP1/TNFAIP3/RIPK2/NFKB1/NFKB2/UBE2V1/TXN/MAPK14/MAP2K6/RELA/UBE2N	11	Protein
Srp dependent cotranslational protein targeting to membrane	16/490	113/11290	0.141593	3.26242	5.14829	2.80526e-05	0.00386241	0.00345774	RPS23/RPS26/RPS20/RPL18A/RPL26L1/SEC11A/RPL19/RPS19/RPL29/RPL36A/RPL36/RPL24/RPL27A/RPS3/RPS27/RPL3	16	Protein
Response of eif2ak4 gcn2 to amino acid deficiency	15/490	102/11290	0.147059	3.38836	5.16103	3.15832e-05	0.00386241	0.00345774	RPS23/RPS26/RPS20/RPL18A/RPL26L1/RPL19/RPS19/RPL29/RPL36A/RPL36/RPL24/RPL27A/RPS3/RPS27/RPL3	15	Protein
Translation	29/490	295/11290	0.0983051	2.26503	4.68951	3.28157e-05	0.00386241	0.00345774	MRPS26/RPS23/TARS2/RPS26/MRPL43/CARS2/RPS20/EEF1A2/MRPL23/RPL18A/EIF4E/RPL26L1/MRPS18B/SEC11A/MRPL33/RPL19/PTCD3/RPS19/RPL29/RPL36A/RPL36/MRPL45/RPL24/RPL27A/MRPL52/RPS3/RPS27/MRPL14/RPL3	29	Protein
Nonsense mediated decay nmd	16/490	116/11290	0.137931	3.17804	5.02233	3.90013e-05	0.00417314	0.00373592	RPS23/RPS26/RPS20/RPL18A/RPL26L1/RPL19/RPS19/SMG6/RPL29/RPL36A/RPL36/RPL24/RPL27A/RPS3/RPS27/RPL3	16	Protein
Extracellular matrix organization	29/490	300/11290	0.0966667	2.22728	4.58901	4.47066e-05	0.00435803	0.00390143	COL4A1/COL8A1/ICAM1/COL4A2/HSPG2/FN1/FBN1/NID2/EFEMP1/COL5A1/COLGALT1/ADAMTS4/PLOD1/NID1/COL6A2/COL6A1/ADAM9/P4HA2/P3H3/MMP2/LTBP3/TIMP2/LAMA3/CTSS/ITGB4/FGF2/COL1A1/TGFB2/LOX	29	Protein
Selenoamino acid metabolism	16/490	118/11290	0.135593	3.12418	4.94061	4.82514e-05	0.00435803	0.00390143	RPS23/RPS26/RPS20/SCLY/RPL18A/RPL26L1/RPL19/RPS19/RPL29/RPL36A/RPL36/RPL24/RPL27A/RPS3/RPS27/RPL3	16	Protein
Assembly of collagen fibrils and other multimeric structures	11/490	61/11290	0.180328	4.1549	5.26252	5.36448e-05	0.00435803	0.00390143	COL4A1/COL8A1/COL4A2/COL5A1/COL6A2/COL6A1/LAMA3/CTSS/ITGB4/COL1A1/LOX	11	Protein
Sars cov 2 modulates host translation machinery	10/490	51/11290	0.196078	4.51781	5.36299	5.55399e-05	0.00435803	0.00390143	RPS23/RPS26/SNRPD1/RPS20/SNRPD3/RPS19/RPS3/RPS27/GEMIN8/SMN1	10	Protein
Eukaryotic translation initiation	16/490	120/11290	0.133333	3.07211	4.86061	5.93829e-05	0.00436836	0.00391068	RPS23/RPS26/RPS20/RPL18A/EIF4E/RPL26L1/RPL19/RPS19/RPL29/RPL36A/RPL36/RPL24/RPL27A/RPS3/RPS27/RPL3	16	Protein
Traf6 mediated nf kb activation	7/490	25/11290	0.28	6.45143	5.81204	6.75339e-05	0.00467573	0.00418585	NFKB1/NFKB2/IFIH1/TRAF2/MAP3K1/MAVS/RELA	7	Protein
rRNA processing	22/490	205/11290	0.107317	2.47267	4.53241	8.109e-05	0.00530239	0.00474685	RPS23/RPS26/RPS20/NOB1/RPP14/SNU13/RPL18A/RPL26L1/RPL19/RPS19/RPL29/RPL36A/RPL36/GAR1/RPL24/NOL11/RPL27A/RPS3/EXOSC8/RPS27/EXOSC6/RPL3	22	Protein
Degradation of the extracellular matrix	17/490	140/11290	0.121429	2.79781	4.55916	0.000115866	0.0071776	0.00642559	COL4A1/COL8A1/COL4A2/HSPG2/FN1/FBN1/COL5A1/ADAMTS4/NID1/COL6A2/COL6A1/ADAM9/MMP2/TIMP2/LAMA3/CTSS/COL1A1	17	Protein
Collagen biosynthesis and modifying enzymes	11/490	67/11290	0.164179	3.78282	4.86611	0.000130342	0.00767064	0.00686697	COL4A1/COL8A1/COL4A2/COL5A1/COLGALT1/PLOD1/COL6A2/COL6A1/P4HA2/P3H3/COL1A1	11	Protein
Sars cov 1 infection	17/490	143/11290	0.118881	2.73912	4.45792	0.000150659	0.00828334	0.00741548	CASP1/NMI/NFKB1/IFIH1/RPS23/RPS26/SMAD4/RPS20/KPNA2/MAVS/CHMP4A/FKBP1A/RPS19/RELA/RPS3/RPS27/SMAD3	17	Protein
Cellular response to starvation	18/490	157/11290	0.11465	2.64162	4.41195	0.000154829	0.00828334	0.00741548	RPS23/RPS26/ATP6V1G1/RPS20/RPL18A/RPL26L1/RPL19/RPS19/LAMTOR1/RPL29/RPL36A/RPL36/RPL24/RPL27A/RPS3/RPS27/RPL3/LAMTOR2	18	Protein
Sars cov 2 host interactions	21/490	204/11290	0.102941	2.37185	4.21161	0.000210648	0.0104666	0.00936996	RIPK2/IFIH1/RPS23/RPS26/HLA-E/POM121C/HLA-B/SNRPD1/RPS20/KPNA2/MAVS/UBE2V1/SNRPD3/B2M/RPS19/UBE2N/NUP35/RPS3/RPS27/GEMIN8/SMN1	21	Protein
Synthesis of udp n acetyl glucosamine	4/490	8/11290	0.5	11.5204	6.34013	0.000213422	0.0104666	0.00936996	GFPT2/AMDHD2/UAP1/GNPNAT1	4	Protein
Figure 4f
Description	GeneRatio	BgRatio	RichFactor	FoldEnrichment	zScore	pvalue	p.adjust	qvalue	geneID	Count	From
Aerobic respiration and respiratory electron transport	44/753	260/11290	0.169231	2.53734	6.70401	7.93076e-09	5.92544e-06	5.46912e-06	SIRT3/COX6A1/NDUFAF7/COX11/ACO2/NDUFS5/MT-CO1/SCO1/NDUFS6/COX7A1/DMAC2L/ATP5MK/ATP5F1D/CS/FXN/HIGD1A/NDUFB5/NDUFA2/NEK1/NDUFA10/NDUFA4/NDUFAB1/NDUFV2/NDUFA9/NDUFA7/ATP5MG/ACAD9/MT-ATP8/COA3/KGD4/NDUFC2/NDUFS2/SUCLA2/VDAC1/ATP5PO/MT-ND4/NDUFB8/NDUFB9/NDUFA8/NDUFV1/NDUFA13/ECSIT/ATP5ME/MT-CO2	44	Protein
Complex i biogenesis	20/753	68/11290	0.294118	4.40981	7.53905	9.17961e-09	5.92544e-06	5.46912e-06	NDUFAF7/NDUFS5/NDUFS6/NDUFB5/NDUFA2/NDUFA10/NDUFAB1/NDUFV2/NDUFA9/NDUFA7/ACAD9/NDUFC2/NDUFS2/MT-ND4/NDUFB8/NDUFB9/NDUFA8/NDUFV1/NDUFA13/ECSIT	20	Protein
Respiratory electron transport	30/753	158/11290	0.189873	2.84684	6.2494	1.50306e-07	6.46815e-05	5.97004e-05	COX6A1/NDUFAF7/COX11/NDUFS5/MT-CO1/SCO1/NDUFS6/COX7A1/FXN/HIGD1A/NDUFB5/NDUFA2/NDUFA10/NDUFA4/NDUFAB1/NDUFV2/NDUFA9/NDUFA7/ACAD9/COA3/NDUFC2/NDUFS2/MT-ND4/NDUFB8/NDUFB9/NDUFA8/NDUFV1/NDUFA13/ECSIT/MT-CO2	30	Protein
Neutrophil degranulation	59/753	478/11290	0.123431	1.85064	5.08014	2.73568e-06	0.000882942	0.000814946	CTSZ/PSEN1/ATP6V1D/HMGB1/CEACAM1/LAMTOR1/EEF1A1/GSDMD/FTL/ATP11A/CTSC/MME/DDOST/TRAPPC1/PRDX4/SLC2A3/IMPDH2/TUBB4B/STK11IP/XRCC6/GNS/LAMP1/GRN/PDAP1/DYNLL1/SURF4/SRP14/ASAH1/ANXA2/PYGL/PRDX6/ARL8A/PAFAH1B2/TMT1A/VCL/NHLRC3/CD58/CST3/EEF2/CTSB/NDUFC2/PTGES2/CDK13/OSTF1/NCSTN/TOLLIP/TSPAN14/GMFG/TUBB/CD93/HLA-B/SLC44A2/ARPC5/HLA-C/STK10/ANPEP/CD55/TXNDC5/B2M	59	Protein
Mitochondrial translation	20/753	96/11290	0.208333	3.12362	5.58581	4.07814e-06	0.00105298	0.000971885	MRPL2/MTRF1L/MTIF3/MRPL12/MRPL9/MRPL48/MRPL19/MTFMT/MRPS16/MRPS18A/MRPS18C/MRPS33/MRPL24/MRPS9/KGD4/MRPL1/MRPS31/MRPL34/MRPS23/PTCD3	20	Protein
Copi mediated anterograde transport	20/753	102/11290	0.196078	2.93987	5.26095	1.07213e-05	0.00230686	0.00212921	COG2/DCTN3/COG8/DYNC1I2/COPZ1/GORASP1/TUBB4B/KDELR3/ARF5/DYNLL1/COPZ2/ARFGAP1/ARF1/COG5/TUBB3/CAPZA2/STX5/TUBB6/CD55/TMED9	20	Protein
Mitochondrial biogenesis	19/753	96/11290	0.197917	2.96744	5.175	1.54185e-05	0.00284361	0.00262462	SOD2/SIRT3/CHCHD6/SAMM50/MAPK11/ATF2/MED1/CREB1/TMEM11/DMAC2L/ATP5MK/ATP5F1D/ATP5MG/TFB2M/CARM1/MT-ATP8/ATP5PO/SIRT5/ATP5ME	19	Protein
Asparagine n linked glycosylation	40/753	307/11290	0.130293	1.95353	4.52805	3.33462e-05	0.00479338	0.00442424	CTSZ/COG2/DCTN3/COG8/SEC24A/DOLK/MAN1A1/CTSC/DYNC1I2/ST6GAL1/GMPPB/DDOST/GNPNAT1/COPZ1/TRAPPC1/GORASP1/DPM1/MPI/TUBB4B/UAP1/KDELR3/ARF5/PMM2/DYNLL1/ALG8/MIA2/COPZ2/ARFGAP1/EDEM3/MAN2A2/HK1/MOGS/ARF1/COG5/TUBB3/CAPZA2/STX5/TUBB6/CD55/TMED9	40	Protein
Er to golgi anterograde transport	25/753	156/11290	0.160256	2.40278	4.71622	3.57782e-05	0.00479338	0.00442424	CTSZ/COG2/DCTN3/COG8/SEC24A/CTSC/DYNC1I2/COPZ1/TRAPPC1/GORASP1/TUBB4B/KDELR3/ARF5/DYNLL1/MIA2/COPZ2/ARFGAP1/ARF1/COG5/TUBB3/CAPZA2/STX5/TUBB6/CD55/TMED9	25	Protein
Cristae formation	10/753	33/11290	0.30303	4.54344	5.44926	3.71292e-05	0.00479338	0.00442424	CHCHD6/SAMM50/TMEM11/DMAC2L/ATP5MK/ATP5F1D/ATP5MG/MT-ATP8/ATP5PO/ATP5ME	10	Protein
Transport to the golgi and subsequent modification	28/753	187/11290	0.149733	2.245	4.58918	4.4338e-05	0.00520366	0.00480292	CTSZ/COG2/DCTN3/COG8/SEC24A/MAN1A1/CTSC/DYNC1I2/ST6GAL1/COPZ1/TRAPPC1/GORASP1/TUBB4B/KDELR3/ARF5/DYNLL1/MIA2/COPZ2/ARFGAP1/MAN2A2/ARF1/COG5/TUBB3/CAPZA2/STX5/TUBB6/CD55/TMED9	28	Protein
Organelle biogenesis and maintenance	38/753	297/11290	0.127946	1.91834	4.28737	7.75373e-05	0.00834172	0.00769931	SOD2/SIRT3/DCTN3/CHCHD6/SAMM50/MAPK11/CCT5/ATF2/MED1/PRKAR2B/YWHAG/DYNC1I2/CREB1/TMEM11/DMAC2L/ATP5MK/ATP5F1D/ARL3/TUBB4B/EXOC2/NDE1/PKD2/RP2/DYNLL1/HAUS1/ATP5MG/TFB2M/CARM1/MT-ATP8/TUBB3/HAUS3/ATP5PO/IFT57/TUBB/SIRT5/TUBB6/BBS2/ATP5ME	38	Protein
Translation	37/753	295/11290	0.125424	1.88052	4.09657	0.000145231	0.0144226	0.0133119	MRPL2/MTRF1L/MTIF3/MRPL12/GSPT1/MRPL9/MRPL48/EEF1A1/MRPL19/MTFMT/EIF2S3/MRPS16/DDOST/RPS10/TARS2/VARS1/RPL15/MRPS18A/SRP14/MRPS18C/MRPS33/MRPL24/MRPS9/EEF2/SARS1/KGD4/SEC11A/RPL22/HARS2/RPL10A/RPL24/MRPL1/MRPS31/MRPL34/RPS26/MRPS23/PTCD3	37	Protein
Intra golgi and retrograde golgi to er traffic	28/753	203/11290	0.137931	2.06805	4.10487	0.000189877	0.0175094	0.016161	COG2/DCTN3/VPS54/COG8/TGOLN2/STX18/MAN1A1/DYNC1I2/COPZ1/VPS53/TUBB4B/RAB33B/KDELR3/ARF5/DYNLL1/SURF4/COPZ2/ARFGAP1/PAFAH1B2/MAN2A2/ARF1/COG5/TUBB3/CAPZA2/STX5/TUBB6/RABEPK/TMED9	28	Protein
Formation of atp by chemiosmotic coupling	7/753	20/11290	0.35	5.24768	5.08243	0.000205246	0.0176649	0.0163045	DMAC2L/ATP5MK/ATP5F1D/ATP5MG/MT-ATP8/ATP5PO/ATP5ME	7	Protein
Protein repair	4/753	6/11290	0.666667	9.99557	5.89169	0.000264199	0.0200636	0.0185184	MSRB2/MSRB3/TXN/PCMT1	4	Protein
Synthesis of gdp mannose	4/753	6/11290	0.666667	9.99557	5.89169	0.000264199	0.0200636	0.0185184	GMPPB/MPI/PMM2/HK1	4	Protein
Mitochondrial protein import	13/753	65/11290	0.2	2.99867	4.31988	0.000300539	0.0215553	0.0198954	TOMM5/SAMM50/ACO2/TIMM13/CS/FXN/TIMM9/TIMM10/COA4/VDAC1/NDUFB8/PMPCA/TOMM22	13	Protein
Transcriptional regulation by tp53	41/753	360/11290	0.113889	1.70758	3.64739	0.000517736	0.0351788	0.0324697	CASP1/TNFRSF10C/DAXX/COX6A1/TP53RK/PRMT5/MAPK11/RPA3/RRM2B/LAMTOR1/TNKS1BP1/MT-CO1/TAF6/CDKN2A/ATF2/YWHAG/COX7A1/CDK2/TNFRSF10A/TP53I3/SMYD2/RBBP4/EHMT2/CDKN1A/SUPT4H1/NDUFA4/CASP10/SUPT5H/CARM1/RRAGA/CDK13/PCNA/PPP1R13B/GATAD2B/CDK9/TXN/SSRP1/RPA2/PRDX2/MT-CO2/MLST8	41	Protein
Cdc42 gtpase cycle	22/753	155/11290	0.141935	2.12809	3.78034	0.000604453	0.0390174	0.0360127	PLEKHG4/ARHGDIA/LAMTOR1/ABR/SHKBP1/DOCK10/TRIO/ARHGAP21/SRGAP1/CDC42EP5/PREX1/SCRIB/CHN1/ARHGEF11/ARHGAP22/DOCK7/PREX2/ARHGAP5/ARHGAP31/FNBP1L/CAV1/PAK2	22	Protein
Metabolism of nucleotides	16/753	97/11290	0.164948	2.47313	3.89512	0.000636664	0.0391397	0.0361255	DPYD/ADSL/UPP1/RRM2B/DNPH1/IMPDH2/DTYMK/DGUOK/CAD/ENTPD5/NUDT9/DCTPP1/DCTD/NT5C2/TXN/NUDT1	16	Protein
Mitochondrial protein degradation	16/753	98/11290	0.163265	2.4479	3.84825	0.000714928	0.0419533	0.0387224	MRPL12/ACO2/MT-CO1/CS/NDUFA2/TIMM9/ALDH2/TIMM10/ATP5MG/DBT/ATP5PO/PMPCA/NDUFV1/NDUFA13/LONP1/MT-CO2	16	Protein

## Sheet: Fig._4d
Figure 4d
	Tot. branching lenght
Hours	Ctrl_MCM				MCM			Ctrl_ACM				ACM
2	95.8631	92.9708	108.182	102.984	99.8873	99.8873	100.225	107.035	99.2298	92.1539	101.581	103.403	100.526	104.478	91.5928
4	83.8415	84.4426	80.3214	85.5734	89.8464	92.0166	93.8823	98.9147	86.1069	92.8275	77.1245	97.0501	82.2598	91.1822	90.4219
6	70.719	66.2496	73.1531	71.7664	80.1629	82.3359	81.6795	78.9167	74.9183	72.777	62.5679	81.3988	79.9152	82.9644	86.3209
8	65.9104	60.5721	61.6225	58.3969	81.0316	73.7529	78.8139	71.059	70.2093	67.1904	57.8527	77.3826	71.7081	67.276	80.4159
	Sidak's multiple comparisons test			Ctrl_MCM - MCM			Sidak's multiple comparisons test			Ctrl_ACM - ACM
	Mean Diff,	95,00% CI of diff,	Significant?	Summary	Adjusted P Value		Mean Diff,	95,00% CI of diff,	Significant?	Summary	Adjusted P Value
2h	-4.167e-08	-18,42 to 18,42	No	ns	>0,9999		1.75e-07	-12,11 to 12,11	No	ns	>0,9999
4h	-8.37	-14,70 to -2,041	Yes	*	0.0167		-1.485	-13,59 to 10,62	No	ns	0.9957
6h	-10.92	-17,89 to -3,956	Yes	*	0.0101		-10.35	-22,46 to 1,750	No	ns	0.1157
8h	-16.24	-27,77 to -4,715	Yes	*	0.0151		-7.618	-19,72 to 4,488	No	ns	0.3532
	Tot. segment lenght
Hours	Ctrl_MCM				MCM			Ctrl_ACM				ACM
2	92.7874	97.1001	113.719	96.3931	100.77	100.77	98.46	108.097	110.141	81.7576	100.005	99.7268	101.551	104.294	94.4284
4	84.2892	94.7764	80.1603	91.2697	91.1072	100.315	98.2372	107.159	95.6159	89.9185	72.4167	92.2029	82.076	88.2341	87.5834
6	74.4806	67.7405	77.4218	65.5865	93.399	97.0504	92.4668	84.4039	80.158	81.728	59.3286	84.7594	76.9864	88.1578	92.681
8	65.4404	62.5841	67.5897	55.6979	96.7958	82.6586	88.1379	78.6324	73.6213	72.866	60.1234	81.0999	73.1662	68.9283	87.27
	Sidak's multiple comparisons test			Ctrl_MCM - MCM			Sidak's multiple comparisons test			Ctrl_ACM - ACM
	Mean Diff,	95,00% CI of diff,	Significant?	Summary	Adjusted P Value		Mean Diff,	95,00% CI of diff,	Significant?	Summary	Adjusted P Value
2h	-2e-07	-24,18 to 24,18	No	ns	>0,9999		1.5e-07	-31,20 to 31,20	No	ns	>0,9999
4h	-8.929	-25,34 to 7,480	No	ns	0.3262		3.753	-31,75 to 39,25	No	ns	0.9846
6h	-23	-35,79 to -10,20	Yes	**	0.0054		-9.242	-34,97 to 16,49	No	ns	0.6399
8h	-26.37	-49,12 to -3,619	Yes	*	0.0315		-6.305	-26,23 to 13,62	No	ns	0.7727

## Sheet: Fig._4g
Figure 4g
	D-loop				CYTB				16s rRNA
	Control	MCM	Control	ACM	Control	MCM	Control	ACM	Control	MCM	Control	ACM
Assay #1	1.08673	0.910553	1.07425	0.90987	1.16473	0.969165	0.959264	1.18132
	1.06683	0.964697	0.83702	0.713869	1.24545	1.02206	0.905425	0.924705	0.897095	0.851541	0.99539	0.916199
Assay #2	0.587774	0.925399	0.695762	1.13058	0.395021	0.969165	0.884745	0.988787	0.689362	0.919007	0.780967	1.16775
	0.589134	0.966929	0.679871	1.26904	0.378929	0.904263	0.747425	0.870791	0.497695	1.08534	0.775572	1.08202
	0.598739	0.904263	0.687771	1.35698	0.455861	0.96025	0.759611	1.20058	0.443396	1.12621	0.76313	1.00028
	0.899171	0.84176	0.66281	1.50219	0.954842	0.944844	0.782773	1.66678	1.07177	1.18494	0.97942	1.77818
	0.946058	0.898017	0.749154	1.64004	0.933033	1.01735	0.80107	1.94585	1.04729	1.02917	0.583714	1.33213
	0.941696	1.00566	0.621288	1.26904	0.833161	0.835946	0.850667	1.64384	0.941696	0.958034	0.848704	1.66294
Assay #3	1.40769	1.05566	0.93088	0.845025	1.67018	0.814968	0.814131	0.666064	1.27751	0.585665	0.797377	0.843075
	1.37237	0.801893	0.974905	0.860789	1.67018	0.739599	0.852635	0.650851	1.46747	0.716058	0.848704	0.955106
	1.32869	0.83788	0.959264	0.784801	1.50177	0.758637	0.791869	0.837251	1.43065	0.743024	0.790041	0.795756
	0.905425	0.801893	1.11471	1.87523	1.00928	0.931836	1.18646	1.65527	1.07923	0.923264	1.16473	1.49526
	0.972655	0.885654	1.24258	1.49872	0.920188	0.929686	1.30134	1.63626	0.950439	0.877506	1.20025	1.04517
	0.99539	0.978164	1.92297	1.21734	0.963707	0.847615	1.29834	1.94136	1.18372	0.887702	1.18372	1.36958
	Mann Whitney test (two-tailed)
	MCM vs Control		ACM vs Control		MCM vs Control		ACM vs Control		MCM vs Control		ACM vs Control
	P value	0.2409	P value	0.0234	P value	0.3699	P value	0.0444	P value	0.3358	P value	0.0115
	Exact or approximate P value?	Exact	Exact or approximate P value?	Exact	Exact or approximate P value?	Exact	Exact or approximate P value?	Exact	Exact or approximate P value?	Exact	Exact or approximate P value?	Exact
	P value summary	ns	P value summary	*	P value summary	ns	P value summary	*	P value summary	ns	P value summary	*

[truncated: 27 more sheets: Fig._4h, Fig._5c, Fig._5d, Fig._6b, Fig._6d-e, Fig._7b, Fig._7d-e, Fig._8a-c, Fig._8f-g, Fig._9c, Fig._9e-g, Fig._S1d, Fig._S2e, Fig._S3d, Fig._S4d, Fig._S4g, Fig._S5c, Fig._S5d, Fig._S6f, Fig._S6g …]
