# Supplementary material for: An adipocyte-endothelial framework to identify molecular signatures of metabolic vulnerability in obesity
Source: Research Square preprint supplement (doi:10.21203/rs.3.rs-9485802/v1), 2026-04-23
Supplement: Supplementary file 3 [file a7fe51cb683bf251859329b1.docx]

**SUPPLEMENTAL DATA**

**An adipocyte-endothelial framework to identify molecular signatures of metabolic vulnerability in obesity**

Vaishali Chaurasiya1,2,#, Luyang Li3,4,#, Aina Lluch5,6,#, Ana Fernández-Sánchez5, Jukka Harju7, Dan Duc Pham1, Sanni Perttunen1, Salla Keskitalo8, Markku Varjosalo8, Kirsi H. Pietiläinen9,10, P.A. Nidhina Haridas1, José M. Moreno-Navarrete5,6,11, José I. Rodríguez-Hermosa5,11,

Encarna Piedrafita-Serra5,11, Asha Kar12,13, Päivi Pajukanta12,13, Markku Laakso14,

Ville Männistö14, Jussi Pihlajamäki15, Minna U. Kaikkonen16, Gema Frühbeck6,17,

Oriol A. Rangel-Zúñiga6,18, Francisco J. Tinahones6,19, Carlos Diéguez6,20,

Ralph Burkhardt21, Marcus Höring21, Gerhard Liebisch21, Johanna Pörschke22,

María Gómez-Serrano22, Johannes Graumann23, Witold Szymanski23,

José M. Fernández-Real5,6,11, You Zhou3,4, Vesa M. Olkkonen1,24,*, Francisco J. Ortega5,6,**

1 Minerva Foundation Institute for Medical Research, Biomedicum 2U – Helsinki, Finland

2 Doctoral Programme in Clinical Research, University of Helsinki – Helsinki, Finland

3 Division of Infection and Immunity, School of Medicine, Cardiff University – Cardiff, United Kingdom

4 Systems Immunity Research Institute, Cardiff University – Cardiff, United Kingdom

5 Girona Biomedical Research Institute – Girona, Spain

6 CIBER de la Fisiología de la Obesidad y la Nutrición – Madrid, Spain

7 Department of Gastrointestinal Surgery, Abdominal Center, University of Helsinki and Helsinki University Hospital – Helsinki, Finland

8 Molecular Systems Biology Research Group & Proteomics Unit, HiLIFE Helsinki Institute of Life Science, Institute of Biotechnology, University of Helsinki – Helsinki, Finland

9 Obesity Research Unit, Research Program for Clinical and Molecular Metabolism, Faculty of Medicine, Helsinki University Hospital, University of Helsinki – Helsinki, Finland

10 HealthyWeightHub, Endocrinology, Abdominal Center, Helsinki University Hospital – Helsinki, Finland

11 School of Medicine, University of Girona – Girona, Spain

12 Bioinformatics Interdepartmental Program, UCLA – Los Angeles, USA

13 Institute for Precision Health, David Geffen School of Medicine at UCLA – Los Angeles, USA

14 Institute of Clinical Medicine, University of Eastern Finland and Kuopio University Hospital – Kuopio, Finland

15 Institute of Public Health and Clinical Nutrition, University of Eastern Finland and Kuopio University Hospital – Kuopio, Finland

16 A.I. Virtanen Institute for Molecular Sciences, University of Eastern Finland – Kuopio, Finland

17 Instituto de Investigación Sanitaria de Navarra (IdISNA), Clínica Universidad de Navarra – Pamplona, Spain

18 Maimónides Biomedical Research Institute of Córdoba (IMIBIC), Reina Sofia University Hospital, University of Córdoba – Córdoba, Spain

19 Instituto de Investigación Biomédica de Málaga (IBIMA), Virgen de la Victoria Hospital, University of Málaga – Málaga, Spain

20 Center for Research in Molecular Medicine and Chronic Diseases (CiMUS, University of Santiago de Compostela, Instituto de Investigación Sanitaria – Santiago de Compostela, Spain

21 Institute of Clinical Chemistry and Laboratory Medicine, University Hospital Regensburg – Regensburg, Germany

22 Institute for Tumor Immunology, Center for Tumor Biology and Immunology, Marburg University – Marburg, Germany

23 Institute of Translational Proteomics & Core Facility, Marburg University – Marburg, Germany

24 Department of Anatomy, Faculty of Medicine, University of Helsinki – Helsinki, Finland

# Equal contribution

Corresponding authors:

*V. M. Olkkonen, Ph.D. email: [vesa.olkkonen@helsinki.fi](mailto:vesa.olkkonen@helsinki.fi)

**F. J. Ortega, Ph.D. email: [fortega@idibgi.org](mailto:fortega@idibgi.org)

**Short title:** Signatures of meta-inflammation in adipose tissue.

## SUPPLEMENTARY TABLES

**Supplementary Table S1.** Clinical and biochemical data of cholecystectomy patients (cohort #2) in which omental adipose tissue was collected for adipocyte and endothelial cell isolation.

| Cross-sectional study | | | |
| --- | --- | --- | --- |
| Parameters | Lean (n=9) | Obese (n=8) | p-valuea |
| Age (yrs) | 48 ± 11.5 | 45 ± 9.8 | 0.499 |
| Sex (men/women) | 0/8 | 2/7 | n/a |
| BMI (kg / m2) | 23.1 ± 1.6 | 34.1 ±2.6 | <0.0001 |
| Glucose (mg / dl) | 92.7 ± 6.1 | 100.7 ± 7.4 | 0.030 |
| HbA1c (%) | 5 ± 0.2 | 5.4 ± 0.3 | 0.011 |
| Insulin (mU / l) | 4.6 ± 1.7 | 19.4 ± 12.6 | 0.007 |
| HOMA-IR (>2) | 1.1 ± 0.4 | 4.8 ± 3.5 | 0.009 |
| Cholesterol (mg / dl) | 168.5± 21.5 | 176 ± 22.5 | 0.484 |
| LDL (mg / dl) | 106.8 ± 25.2 | 133.5 ± 30.4 | 0.058 |
| HDL (mg / dl) | 55.3 ± 11.4 | 41.2 ± 9.3 | 0.016 |
| Triglycerides (mg / dl) | 88.6 ± 39.5 | 123.9 ± 35.9 | 0.101 |

Values show the mean ± S.D. BMI: body mass index; HbA1C: glycated hemoglobin; HOMA-IR: homeostatic model assessment for insulin resistance (where > 2 indicate insulin resistance); H/LDL: high/low-density lipoproteins. a Results obese vs lean were compared by unequal variance *t*-test. n/a, no applies.

**Supplementary Table S2.** Anthropometric and biochemical data depicting cohort #1, including 18 gastric bypass patients with severe obesity before (baseline) and after weight loss (post-WL).

| Longitudinal study | | | |
| --- | --- | --- | --- |
| Parameters | Baseline | Post-WL | p-valuea |
| Age (years) | 48 ± 10 | 51 ± 10 | <0.0001 |
| Sex (men/women) | 2/16 | | n/a |
| BMI (kg/m2) | 42.8 ± 4.9 | 28.6 ± 5.5 | <0.0001 |
| SBP (mmg) | 128.2 ± 14.6 | 129.6 ± 16.0 | 0.721 |
| DBP (mmg) | 80.4 ± 10.2 | 74.4 ± 14.2 | 0.136 |
| Glucose (mg/dl) | 102.7 ± 41.0 | 88.4 ± 15.7 | 0.178 |
| HbA1c (%) | 6.0 ± 1.6 | 5.3 ± 0.4 | 0.112 |
| Cholesterol (mg/dl) | 180.9 ± 54.0 | 174.9 ± 30.3 | 0.607 |
| LDL (mg/dl) | 99.2 ± 26.3 | 96.8 ± 25.2 | 0.708 |
| HDL (mg/dl) | 54.7 ± 14.1 | 74.9 ± 24.1 | <0.0001 |
| Triglycerides (mg/dl) | 105.2 ± 36.5 | 86.7 ± 31.0 | 0.072 |

Values show the mean ± S.D. BMI: body mass index; S/DBP: systolic/diastolic blood pressure; HbA1C: glycated hemoglobin; H/LDL: high/low-density lipoproteins. a Results post-weight loss *vs* baseline were compared by paired *t*-test. n/a, no applies.

**Supplementary Table S3.** Clinical and biochemical parameters of subjects included in the cross-sectional study METSIM (cohort #3).

| N | 335 |
| --- | --- |
| Sex (% men) | 100 |
| Age (years) | 54 ± 5 |
| BMI (kg/m2) | 26.8 ± 3.7 |
| SBP (mmHg) | 133.9 ± 14.7 |
| DBP (mmHg) | 87.4 ± 9 |
| Fasting glucose (mg/dl) | 103.3 ± 8.9 |
| HbA1c (%) | 5.6 ± 0.3 |
| Total cholesterol (mg/dl) | 212.4 ± 33.3 |
| LDL cholesterol (mg/dl) | 135.6 ± 28.4 |
| HDL cholesterol (mg/dl) | 56.7 ± 14 |
| Fasting triglycerides (mg/dl) | 121.5 ± 73.1 |

Data are expressed as mean ± S.D. BMI: body mass index; S/DBP: systolic/diastolic blood pressure; HbA1c: glycated hemoglobin; H/LDL: high/low-density lipoproteins.

**Supplementary Table S4.** Clinical and biochemical parameters of subjects included in our cross-sectional study from the ADIPOMIT cohort (cohort #5). Only participants with BMI≥30 kg/m2 were included.

| Parameters | All | HO | UO | p-valuea |
| --- | --- | --- | --- | --- |
| N | 451 | 83 | 368 | n/a |
| Sex (% men) | 30.6 | 36.1 | 29.9 | n/a |
| Age (years) | 46 ± 10 | 45 ± 9 | 47 ± 10 | 0.24 |
| BMI (kg/m2) | 46.8 ± 7.9 | 43.5 ± 8.2 | 47.4 ± 7.3 | <0.0001 |
| SBP (mmHg) | 135.9 ± 18.8 | 136.7 ± 17.0 | 135.9 ± 19.1 | 0.744 |
| DBP (mmHg) | 81.7 ± 12.8 | 80.0 ± 12.1 | 82.3 ± 12.8 | 0.151 |
| Fasting glucose (mg/dl) | 109.0 ± 31.2 | 88.1 ± 7.9 | 113.8 ± 32.5 | <0.0001 |
| HbA1c (%) | 6.1 ± 1.3 | 5.4 ± 0.6 | 6.3 ± 1.4 | <0.0001 |
| Total cholesterol (mg/dl) | 178.8 ± 41.3 | 184.9 ± 33.9 | 177.6 ± 42.8 | 0.149 |
| HDL cholesterol (mg/dl) | 108.0 ± 32.9 | 61.2 ± 20.5 | 42.4 ± 15.1 | <0.0001 |
| LDL cholesterol (mg/dl) | 45.8 ± 17.7 | 111.1 ± 27.2 | 107.4 ± 34.0 | 0.354 |
| Fasting triglycerides (mg/dl) | 138.6 ± 71.0 | 96.2 ± 28.0 | 148.0 ± 74.3 | <0.0001 |

Data are expressed as mean ± S.D. BMI: body mass index; S/DBP: systolic/diastolic blood pressure; HbA1c: glycated hemoglobin; H/LDL: high/low-density lipoproteins. a Results metabolically “unhealthy” (UO) *vs* “healthy” (HO) obesity were compared by Student *t*-test. n/a, no applies.

**Supplementary Table S5.** Clinical and biochemical parameters of subjects included in the KOBS cohort (cohort #6). Only participants with BMI≥30 kg/m2 were included.

| Parameters | All | HO | UO | p-valuea |
| --- | --- | --- | --- | --- |
| N | 241 | 22 | 219 | n/a |
| Sex (% men) | 30.7 | 40.9 | 29.7 | n/a |
| Age (years) | 48.8 ± 9.1 | 49.1 ± 9.2 | 48.8 ± 9.2 | 0.867 |
| BMI (kg/m2) | 43.1 ± 5.3 | 40.9 ± 3.6 | 43.3 ± 5.4 | 0.008 |
| Fasting glucose (mg/dl) | 118 ± 35.8 | 93.2 ± 5.4 | 120.5 ± 36.6 | <0.0001 |
| Total cholesterol (mg/dl) | 159.5 ± 34.9 | 159.1 ± 24.4 | 159.6 ± 35.9 | 0.932 |
| HDL cholesterol (mg/dl) | 42.9 ± 11.4 | 56.9 ± 11.2 | 41.5 ± 10.5 | <0.0001 |
| LDL cholesterol (mg/dl) | 89.3 ± 31.1 | 84.7 ± 21.8 | 89.8 ± 31.9 | 0.327 |
| Fasting triglycerides (mg/dl) | 137.9 ± 61.4 | 88.6 ± 23.3 | 142.9 ± 61.9 | <0.0001 |

Data are expressed as mean ± S.D. BMI: body mass index; H/LDL: high/low-density lipoproteins. a Results metabolically “unhealthy” (UO) *vs* “healthy” (HO) obesity were compared by Student *t*-test. n/a, no applies.

**Supplementary Table S6.** Proteomics specifics.

| Study | Sample | Sample preparation | Liquid chromatography | | MS Instrument |
| --- | --- | --- | --- | --- | --- |
| #1a | Bulk adipose tissue | [SP3-C18](https://doi.org/10.5281/zenodo.17570947) | nanoElute 2 | | Bruker TimsTof Ultra |
| #2a | Isolated adipocytes | Methanol/chloroform-C18 | Evosep One | | Bruker TimsTof Pro 2 |
| #2b | Isolated EC | Methanol/chloroform-C18 | Evosep One | | Bruker TimsTof Pro 2 |
| #3a | In vitro adipogenesis | [SP3-C18](https://doi.org/10.5281/zenodo.17570947) | nanoElute 2 | | Bruker TimsTof Pro |
| #3b | MCM-adipocytes | [SP3-C18](https://doi.org/10.5281/zenodo.17570947) | nanoElute 2 | | Bruker TimsTof Pro |
| #3c | MCM-HAMEC | [SP3-C18](https://doi.org/10.5281/zenodo.17570947) | nanoElute 2 | | Bruker TimsTof Ultra |
| #3d | ACM-HAMEC | Methanol/chloroform-C18 | Evosep One | | Bruker TimsTof Pro 2 |
|  |  |  |  | |  |
| Study | Analytical column | MS method | LC method | | Spectrum matching |
| #1a | Bruker PepSep Ultra | [DIA-PASEF_sens_0.96s.m](https://doi.org/10.5281/zenodo.17549946) | [30min_psULTRA_oneCol](https://doi.org/10.5281/zenodo.17549946) | | Dia-NN |
| #2a | Evosep EV1109-60/100 SPD | DDA-PASEF-short_gradient_0.5s.m | Evosep_60SPD_21min | | FragPipe |
| #2b | Evosep EV1109-60/100 SPD | DDA-PASEF-short_gradient_0.5s.m | Evosep_60SPD_21min | | FragPipe |
| #3a | IonOptics Aurora UltimateTM | [DIA-PASEF_long gradient.m](https://doi.org/10.5281/zenodo.17549946) | [Bruker_default_100min_gradient](https://doi.org/10.5281/zenodo.17549946) | | Dia-NN |
| #3b | IonOptics Aurora UltimateTM | [DIA-PASEF_long gradient.m](https://doi.org/10.5281/zenodo.17549946) | [Bruker_default_100min_gradient](https://doi.org/10.5281/zenodo.17549946) | | Dia-NN |
| #3c | Bruker PepSep Ultra | [DIA-PASEF_norm_0.96s.m](https://doi.org/10.5281/zenodo.17549946) | [45min_psULTRA_twoCol](https://doi.org/10.5281/zenodo.17549946) | | Dia-NN |
| #3d | Evosep EV1137-30 SPD | DIA-PASEF-short_gradient.m (DIA windows) | Evosep_30SPD_44min | | Dia-NN |
|  |  |  |  | |  |
| Study | Database | | Autonomics | Computed values for statistics | |
| #1a | UniProt_Human_canonical_012024_20429entries.fasta | | 1.15.145 | Log2 intensity | |
| #2a | 2023-12-18_decoys_reviewed_contam_UP000005640.fas | | 1.17.16 | Log2 intensity | |
| #2b | 2023-12-18_decoys_reviewed_contam_UP000005640.fas | | 1.17.16 | Log2 intensity | |
| #3a | UniProt_Human_canonical_042023_20407entries.fasta | | 1.1.7.14 | Max LFQ | |
| #3b | UniProt_Human_canonical_042023_20407entries.fasta | | 1.1.7.14 | Max LFQ | |
| #3c | UniProt_Human_canonical_112024_20429entries.fasta | | 1.15.235 | Max LFQ | |
| #3d | UniProtKB_Taxonomy_ID_9606_AND_reviewed_2025_02_06.fasta | | 1.15.345 | Max LFQ | |

**Supplementary Table S7.** Functional enrichment of proteins significantly modulated in “obese” vs “lean” isolated adipocytes. Only top 10 terms included in the classification Biological Processes (BP) and Cellular Components (CC) as noted in the Gene Ontology (GO) database are listened below. Abundance changes affecting proteins annotated in categories of interest are represented in **Figure 1c**. For additional details, see in the **Source Data file**, with source data underlying the plots contained in this article.

| # | source | term_name | term_id | Adj._p-value | term_size | intersection_size |
| --- | --- | --- | --- | --- | --- | --- |
| 1 | GO:BP | cellular respiration | GO:0045333 | 8.01E-61 | 73 | 245 |
| 2 | GO:BP | energy derivation by oxidation of organic compounds | GO:0015980 | 1.16E-59 | 82 | 352 |
| 3 | GO:BP | aerobic respiration | GO:0009060 | 1.18E-59 | 67 | 201 |
| 4 | GO:BP | generation of precursor metabolites and energy | GO:0006091 | 2.66E-58 | 91 | 484 |
| 5 | GO:BP | oxidative phosphorylation | GO:0006119 | 9.60E-44 | 50 | 151 |
| 6 | GO:BP | organic acid catabolic process | GO:0016054 | 2.66E-42 | 58 | 242 |
| 7 | GO:BP | carboxylic acid catabolic process | GO:0046395 | 2.66E-42 | 58 | 242 |
| 8 | GO:BP | cellular catabolic process | GO:0044248 | 1.63E-41 | 64 | 323 |
| 9 | GO:BP | small molecule catabolic process | GO:0044282 | 6.57E-40 | 66 | 370 |
| 10 | GO:BP | nucleoside phosphate biosynthetic process | GO:1901293 | 4.14E-36 | 59 | 322 |
| 1 | GO:CC | oxidoreductase complex | GO:1990204 | 2.13E-50 | 54 | 153 |
| 2 | GO:CC | respiratory chain complex | GO:0098803 | 4.95E-44 | 44 | 109 |
| 3 | GO:CC | tricarboxylic acid cycle heteromeric enzyme complex | GO:0045239 | 2.47E-15 | 12 | 17 |
| 4 | GO:CC | nucleoid | GO:0009295 | 2.47E-15 | 17 | 49 |
| 5 | GO:CC | mitochondrial nucleoid | GO:0042645 | 2.47E-15 | 17 | 49 |
| 6 | GO:CC | alpha-ketoacid dehydrogenase complex | GO:0045240 | 9.70E-15 | 12 | 19 |
| 7 | GO:CC | Nadh dehydrogenase complex | GO:0030964 | 1.28E-14 | 16 | 46 |
| 8 | GO:CC | respiratory chain complex i | GO:0045271 | 1.28E-14 | 16 | 46 |
| 9 | GO:CC | proton-transporting atp synthase complex | GO:0045259 | 8.37E-14 | 11 | 17 |
| 10 | GO:CC | mitochondrial protein-containing complex | GO:0098798 | 6.81E-13 | 25 | 178 |

**Supplementary Table S8.** Functional enrichment of proteins significantly modulated during adipogenesis. Only top 10 terms included in the classification Biological Processes (BP) and Cellular Components (CC) as noted in the Gene Ontology (GO) database are listened below. Abundance changes affecting proteins annotated in categories of interest are represented in **Figure S5c**. For additional details, see in the **Source Data file**, with source data underlying the plots contained in this article.

| # | source | term_name | term_id | adj._p-value | term_size | intersection_size |
| --- | --- | --- | --- | --- | --- | --- |
| 1 | GO:BP | small molecule catabolic process | GO:0044282 | 2.97E-17 | 91 | 375 |
| 2 | GO:BP | fatty acid metabolic process | GO:0006631 | 1.05E-16 | 93 | 401 |
| 3 | GO:BP | organic acid catabolic process | GO:0016054 | 1.05E-16 | 70 | 252 |
| 4 | GO:BP | carboxylic acid catabolic process | GO:0046395 | 1.05E-16 | 70 | 252 |
| 5 | GO:BP | fatty acid beta-oxidation | GO:0006635 | 3.22E-15 | 35 | 76 |
| 6 | GO:BP | purine nucleotide metabolic process | GO:0006163 | 4.03E-14 | 96 | 463 |
| 7 | GO:BP | purine-containing compound metabolic process | GO:0072521 | 1.04E-13 | 99 | 493 |
| 8 | GO:BP | fatty acid catabolic process | GO:0009062 | 1.90E-12 | 38 | 106 |
| 9 | GO:BP | lipid oxidation | GO:0034440 | 4.39E-12 | 39 | 114 |
| 10 | GO:BP | monocarboxylic acid catabolic process | GO:0072329 | 4.87E-12 | 42 | 131 |
| 1 | GO:CC | collagen-containing extracellular matrix | GO:0062023 | 1.49E-18 | 98 | 429 |
| 2 | GO:CC | mitochondrial matrix | GO:0005759 | 1.49E-18 | 106 | 487 |
| 3 | GO:CC | focal adhesion | GO:0005925 | 2.52E-18 | 96 | 421 |
| 4 | GO:CC | cell-substrate junction | GO:0030055 | 3.17E-18 | 97 | 431 |
| 5 | GO:CC | organelle outer membrane | GO:0031968 | 6.04E-11 | 57 | 246 |
| 6 | GO:CC | outer membrane | GO:0019867 | 7.22E-11 | 57 | 248 |
| 7 | GO:CC | mitochondrial outer membrane | GO:0005741 | 1.16E-10 | 52 | 217 |
| 8 | GO:CC | oxidoreductase complex | GO:1990204 | 5.20E-10 | 37 | 128 |
| 9 | GO:CC | peroxisome | GO:0005777 | 8.19E-10 | 39 | 143 |
| 10 | GO:CC | microbody | GO:0042579 | 8.19E-10 | 39 | 143 |

**Supplementary Table S9.** Functional enrichment of proteins significantly modulated in MCM-activated adipocytes. Only top 10 terms are listened below. Abundance changes affecting proteins annotated in categories of interest are represented in **Figure 3c**. For further details, see in the **Source Data file**.

| # | source | term_name | term_id | adj._p-value | term_size | intersection_size |
| --- | --- | --- | --- | --- | --- | --- |
| 1 | GO:BP | cellular respiration | GO:0045333 | 1.37E-55 | 83 | 243 |
| 2 | GO:BP | energy derivation by oxidation of organic compounds | GO:0015980 | 1.97E-49 | 89 | 337 |
| 3 | GO:BP | aerobic respiration | GO:0009060 | 3.87E-48 | 70 | 197 |
| 4 | GO:BP | organic acid catabolic process | GO:0016054 | 2.60E-42 | 72 | 252 |
| 5 | GO:BP | carboxylic acid catabolic process | GO:0046395 | 2.60E-42 | 72 | 252 |
| 6 | GO:BP | small molecule catabolic process | GO:0044282 | 4.50E-37 | 80 | 375 |
| 7 | GO:BP | respiratory electron transport chain | GO:0022904 | 4.00E-32 | 46 | 124 |
| 8 | GO:BP | oxidative phosphorylation | GO:0006119 | 1.68E-30 | 48 | 148 |
| 9 | GO:BP | electron transport chain | GO:0022900 | 7.18E-30 | 51 | 176 |
| 10 | GO:BP | purine nucleotide metabolic process | GO:0006163 | 8.81E-29 | 78 | 463 |
| 1 | GO:CC | mitochondrial matrix | GO:0005759 | 3.54E-128 | 172 | 487 |
| 2 | GO:CC | mitochondrial inner membrane | GO:0005743 | 7.56E-89 | 141 | 497 |
| 3 | GO:CC | mitochondrial protein-containing complex | GO:0098798 | 1.33E-84 | 112 | 300 |
| 4 | GO:CC | oxidoreductase complex | GO:1990204 | 9.00E-42 | 53 | 128 |
| 5 | GO:CC | respirasome | GO:0070469 | 1.58E-35 | 44 | 102 |
| 6 | GO:CC | inner mitochondrial membrane protein complex | GO:0098800 | 3.94E-35 | 52 | 158 |
| 7 | GO:CC | respiratory chain complex | GO:0098803 | 2.13E-31 | 39 | 91 |
| 8 | GO:CC | mitochondrial respirasome | GO:0005746 | 8.67E-31 | 39 | 94 |
| 9 | GO:CC | organellar ribosome | GO:0000313 | 2.44E-19 | 29 | 89 |
| 10 | GO:CC | mitochondrial ribosome | GO:0005761 | 2.44E-19 | 29 | 89 |

**Supplementary Table S10.** Functional enrichment of proteins significantly modulated in MCM-activated HAMEC. Only top 10 terms included in the classification Biological Processes (BP) and Cellular Components (CC) as noted in the Gene Ontology (GO) database are listened below. Abundance changes affecting proteins annotated in categories of interest are represented in **Figure S6f**. For additional detail, see in the **Source Data file**.

| # | source | term_name | term_id | adj._p-value | term_size | intersection_size |
| --- | --- | --- | --- | --- | --- | --- |
| 1 | GO:BP | response to hydrogen peroxide | GO:0042542 | 3.20E-04 | 17 | 99 |
| 2 | GO:BP | cellular respiration | GO:0045333 | 4.46E-04 | 27 | 245 |
| 3 | GO:BP | RNA splicing | GO:0008380 | 9.09E-04 | 40 | 482 |
| 4 | GO:BP | RNA splicing, via transesterification reactions | GO:0000377 | 1.17E-03 | 31 | 336 |
| 5 | GO:BP | mRNA splicing, via spliceosome | GO:0000398 | 1.17E-03 | 31 | 336 |
| 6 | GO:BP | RNA splicing, via transesterification reactions | GO:0000375 | 1.26E-03 | 31 | 340 |
| 7 | GO:BP | response to reactive oxygen species | GO:0000302 | 1.96E-03 | 22 | 201 |
| 8 | GO:BP | ribonucleoprotein complex biogenesis | GO:0022613 | 3.85E-03 | 38 | 494 |
| 9 | GO:BP | spliceosomal complex assembly | GO:0000245 | 3.85E-03 | 14 | 96 |
| 10 | GO:BP | energy derivation by oxidation of organic compounds | GO:0015980 | 4.30E-03 | 30 | 352 |
| 1 | GO:CC | collagen-containing extracellular matrix | GO:0062023 | 1.09E-07 | 44 | 432 |
| 2 | GO:CC | ribosomal subunit | GO:0044391 | 2.22E-06 | 25 | 186 |
| 3 | GO:CC | ribosome | GO:0005840 | 6.41E-06 | 28 | 244 |
| 4 | GO:CC | sm-like protein family complex | GO:0120114 | 2.03E-05 | 18 | 119 |
| 5 | GO:CC | U2-type spliceosomal complex | GO:0005684 | 2.03E-05 | 16 | 95 |
| 6 | GO:CC | spliceosomal snrnp complex | GO:0097525 | 2.28E-05 | 16 | 97 |
| 7 | GO:CC | spliceosomal complex | GO:0005681 | 2.41E-05 | 24 | 208 |
| 8 | GO:CC | small nuclear ribonucleoprotein complex | GO:0030532 | 6.29E-05 | 16 | 107 |
| 9 | GO:CC | U2-type precatalytic spliceosome | GO:0071005 | 6.29E-05 | 11 | 50 |
| 10 | GO:CC | precatalytic spliceosome | GO:0071011 | 8.60E-05 | 11 | 52 |

**Supplementary Table S11.** Functional enrichment of proteins significantly modulated in ACM-activated HAMEC. Abundance changes affecting proteins annotated in categories of interest are represented in **Figure S7f**. For additional details, see in the **Source Data file**.

| # | source | term_name | term_id | adj._p-value | term_size | intersection_size |
| --- | --- | --- | --- | --- | --- | --- |
| 1 | GO:BP | ribose phosphate metabolic process | GO:0019693 | 7.83E-09 | 57 | 379 |
| 2 | GO:BP | ribonucleotide metabolic process | GO:0009259 | 7.83E-09 | 56 | 371 |
| 3 | GO:BP | proton motive force-driven mitochondrial atp synthesis | GO:0042776 | 7.83E-09 | 22 | 68 |
| 4 | GO:BP | proton motive force-driven atp synthesis | GO:0015986 | 1.12E-08 | 23 | 77 |
| 5 | GO:BP | aerobic respiration | GO:0009060 | 1.12E-08 | 38 | 201 |
| 6 | GO:BP | ATP biosynthetic process | GO:0006754 | 1.12E-08 | 26 | 100 |
| 7 | GO:BP | nucleoside phosphate biosynthetic process | GO:1901293 | 1.12E-08 | 50 | 322 |
| 8 | GO:BP | nucleoside triphosphate biosynthetic process | GO:0009142 | 1.12E-08 | 29 | 125 |
| 9 | GO:BP | ribonucleoside triphosphate biosynthetic process | GO:0009201 | 1.12E-08 | 28 | 117 |
| 10 | GO:BP | mitochondrion organization | GO:0007005 | 1.12E-08 | 61 | 445 |
| 1 | GO:CC | respiratory chain complex | GO:0098803 | 1.28E-09 | 28 | 109 |
| 2 | GO:CC | NADH dehydrogenase complex | GO:0030964 | 1.84E-08 | 17 | 46 |
| 3 | GO:CC | respiratory chain complex i | GO:0045271 | 1.84E-08 | 17 | 46 |
| 4 | GO:CC | cell-substrate junction | GO:0030055 | 5.64E-06 | 52 | 434 |
| 5 | GO:CC | focal adhesion | GO:0005925 | 5.64E-06 | 51 | 424 |
| 6 | GO:CC | mitochondrial protein-containing complex | GO:0098798 | 7.82E-06 | 29 | 178 |
| 7 | GO:CC | ficolin-1-rich granule | GO:0101002 | 1.58E-05 | 29 | 185 |
| 8 | GO:CC | oxidoreductase complex | GO:1990204 | 4.47E-05 | 25 | 153 |
| 9 | GO:CC | ficolin-1-rich granule lumen | GO:1904813 | 1.79E-04 | 21 | 124 |
| 10 | GO:CC | lysosomal membrane | GO:0005765 | 2.31E-04 | 48 | 451 |

**Supplementary Table S12.** Functional enrichment of proteins significantly modulated in adipose tissue upon WL. Only top 10 terms included in the classification Biological Processes (BP) and Cellular Components (CC) as noted in the Gene Ontology (GO) database are listened below. Abundance changes affecting proteins annotated in categories of interest are represented in **Figure 5c**. For additional details, see in the **Source Data file**, with source data underlying the plots contained in this article.

| # | source | term_name | term_id | Adj._p-value | term_size | intersection_size |
| --- | --- | --- | --- | --- | --- | --- |
| 1 | GO:BP | aerobic respiration | GO:0009060 | 1.46E-22 | 38 | 197 |
| 2 | GO:BP | organic acid catabolic process | GO:0016054 | 1.46E-22 | 42 | 252 |
| 3 | GO:BP | carboxylic acid catabolic process | GO:0046395 | 1.46E-22 | 42 | 252 |
| 4 | GO:BP | cellular respiration | GO:0045333 | 2.62E-22 | 41 | 243 |
| 5 | GO:BP | energy derivation by oxidation of organic compounds | GO:0015980 | 2.02E-20 | 45 | 337 |
| 6 | GO:BP | small molecule catabolic process | GO:0044282 | 2.61E-20 | 47 | 375 |
| 7 | GO:BP | nucleoside bisphosphate metabolic process | GO:0033865 | 1.88E-18 | 28 | 125 |
| 8 | GO:BP | ribonucleoside bisphosphate metabolic process | GO:0033875 | 1.88E-18 | 28 | 125 |
| 9 | GO:BP | purine nucleoside bisphosphate metabolic process | GO:0034032 | 1.88E-18 | 28 | 125 |
| 10 | GO:BP | thioester metabolic process | GO:0035383 | 6.65E-17 | 24 | 96 |
| 1 | GO:CC | mitochondrial matrix | GO:0005759 | 1.64E-52 | 85 | 487 |
| 2 | GO:CC | mitochondrial protein-containing complex | GO:0098798 | 3.86E-32 | 53 | 300 |
| 3 | GO:CC | oxidoreductase complex | GO:1990204 | 1.48E-26 | 34 | 128 |
| 4 | GO:CC | mitochondrial inner membrane | GO:0005743 | 1.48E-26 | 59 | 497 |
| 5 | GO:CC | tricarboxylic acid cycle enzyme complex | GO:0045239 | 5.91E-12 | 10 | 16 |
| 6 | GO:CC | inner mitochondrial membrane protein complex | GO:0098800 | 7.15E-11 | 22 | 158 |
| 7 | GO:CC | mitochondrial pyruvate dehydrogenase complex | GO:0005967 | 5.23E-10 | 7 | 8 |
| 8 | GO:CC | pyruvate dehydrogenase complex | GO:0045254 | 5.23E-10 | 7 | 8 |
| 9 | GO:CC | respirasome | GO:0070469 | 9.91E-10 | 17 | 102 |
| 10 | GO:CC | cytochrome complex | GO:0070069 | 1.02E-09 | 12 | 42 |

**SUPPLEMENTARY FIGURE LEGENDS**

**Supplementary Figure S1. (a)** Numbers of identified proteins in ex vivo isolated adipocyte samples obtained from gallstone surgery patients with (BMI>30 kg/m2) and without (BMI<25 kg/m2) obesity (n=5 and 3, respectively). **(b)** Plotted Log2-scale intensities (log2maxlfq) of identified proteins. **(c)** Hierarchical clustering. **(d)** GSEA (Reactome) of proteomic results in “obese” vs “lean” adipocytes.

**Supplementary Figure S2. (a)** Plotted Log2-scale intensities (log2maxlfq) of metabolites as quantified in isolated adipocyte samples from gallstone surgery patients with (BMI>30 kg/m2) and without (BMI<25 kg/m2) obesity (n=8 and 9, respectively). **(b)** Correlation heatmap. **(c)** PCA analysis and **(d)** heatmap of log2maxlfq values. **(e)** ORA (KEGG) and pathway interpretation of metabolomic results in “obese” vs “lean” adipocytes.

**Supplementary Figure S3. (a)** Numbers of identified proteins in ex vivo isolated endothelial cell (EC) samples obtained from gallstone surgery patients with (BMI>30 kg/m2) and without (BMI<25 kg/m2) obesity (n=5 and 7, respectively). **(b)** Plotted Log2-scale intensities (log2maxlfq) of identified proteins. **(c)** Hierarchical clustering. **(d)** GSEA (Reactome) of proteomic results in “obese” vs “lean” EC.

**Supplementary Figure S4. (a)** Numbers of identified proteins in primary human preadipocyte cultures. **(b)** Plotted Log2-scale intensities (log2maxlfq) of identified proteins, and **(c)** hierarchical clustering of preadipocytes (PA) and mature adipocytes (MA) samples (n=4/group). **(d)** Hierarchical clustering of cultures of MA when treated with 1% MCM for 72 hours and controls (n=4/group). **(e)** Numbers of identified proteins, and **(f)** plotted Log2-scale intensities (log2maxlfq) in inflamed adipocytes (MCM) and controls (CTRL). **(g)** Seahorse mitochondrial stress flux analysis and measures of oxygen consumption rate (OCR) obtained in MA cultures when treated with 1% MCM or vehicle (CTRL) for 72 h (3 assays/each). (**1**)Spare respiratory capacity, (**2**)maximal, (**3**)basal, and (**4**)ATP-production coupled respiration, and (**5**)non-mitochondrial oxygen consumption. The significance was calculated by means of the Mann-Whitney test (Holm-Šídák method for multiple comparisons). *p<0.05, **p<0.01, ***p<0.001.

**Supplementary Figure S5. (a)** Multivariable analysis (PCA) shows the clustering of primary human preadipocyte cultures (n=4/group) upon differentiation into MA and when maintained under basal culture conditions without hormonal stimuli (PA). **(b)** The volcano plot shows DAPs up (red) and down-regulated (blue) in differentiated adipocytes vs PA. Statistical significance was assessed by employing two-tailed Bayesian moderated t-tests and assuming equal variance in unpaired comparisons, and dots in grey show proteins meeting our exclusion criteria (nominal p-value≥0.05). Colored labels indicate protein landmarks of Gene ontology (GO) pathways significantly regulated after adipocyte differentiation, i.e., golgi-vesicle transport (GO:0048193), cell-substrate junction (GO:0030055), cellular respiration (GO:0045333), oxidative phosphorylation (GO:0006119), fatty acid metabolism (GO:0006631), fatty acid beta-oxidation (GO:0006635), and branched-chain amino acid metabolism (GO:0009081). **(c)** Bubble plots created by applying Over-representation analysis (ORA) to enrichment terms in a GO computational framework. ORA pathways were segregated in Biological processes (BP) and Cellular components (CC). Additional details are provided in **Table S8**. **(d)** Gene set enrichment analysis (GSEA) and Kyoto encyclopedia of genes and genomes (KEGG) annotations showed, as expected, the upregulation of cellular processes related to carbon and fatty acid metabolism. **(e)** Lipidomes conducted in PA (n=3) and MA (n=3) showed the higher presence of many glycerophospholipid and sphingolipid species. The dynamic nature of lipids in fat precursor cells upon adipogenic transformation pointed at the modulation of triglycerides (TG), sphingomyelins (SM), phosphatidylserines (PS), phosphatidylinositols (PI), phosphatidylglycerols (PG), phosphatidylethanolamines (PE), phosphatidylcholines (PC), phosphatidic acids (PA), lyso-glycerophosphatidylethanolamines (LPE) and lysophosphatidylcholines (LPC), hexosylceramides (HexCer), free cholesterols (FC), diglycerides (DG), cardiolipins (CL), ceramides (Cer), and cholesteryl esters (CE). Bubble plot in **(f)** shows modulation of TG species, segregated according to the saturation (nº double bounds) and main length (nº carbon atoms) of FA. Lipid concentrations were normalized based on the total amount within each lipid class, followed by log2 transformation for conducting two-tailed Student’s t-test between study and control group. Differential abundance of lipids was identified based on an absolute log2 fold-change (FC) value≥0.58 and p-value<0.05. Source data are provided as a **Source data file** for **Figures S5c** and **S5d**.

**Supplementary Figure S6. (a)** Numbers of identified proteins in HAMEC cultures upon treatment with LPS-conditioned macrophage media (MCM) vs control (vehicle), n=4/group. **(b)** Plotted Log2-scale intensities (log2maxlfq) of identified proteins, and **(c)** correlation heatmap. **(d)** PCA of proteomics results in 1% MCM-activated HAMEC. **(e)** The volcano plot shows DAPs up (red) and down-regulated (blue) in MCM-activated HAMEC. Statistical significance was assessed by employing two-tailed Bayesian moderated t-tests and assuming equal variance in unpaired comparisons, and dots in grey show proteins meeting our exclusion criteria (nominal p-value≥0.05). Colored labels point at protein landmarks of Hallmark pathways significantly regulated in activated EC. **(f)** ORA enrichment terms in a GO computational framework. **(g)** GSEA (Hallmark) annotations according to the main function of altered significantly protein hubs. Source data are provided as a **Source data file**.

**Supplementary Figure S7. (a)** Numbers of identified proteins in HAMEC cultures upon treatment with MCM-conditioned adipocyte media (ACM) vs control (vehicle), n=4/group. **(b)** Plotted Log2-scale intensities (log2maxlfq) of identified proteins, and **(c)** correlation heatmap. **(d)** PCA of proteomics results in 10% ACM-activated HAMEC. **(e)** The volcano plot shows DAPs up (red) and down-regulated (blue) in ACM-activated HAMEC. Statistical significance was assessed by employing two-tailed Bayesian moderated t-tests and assuming equal variance in unpaired comparisons. Dots in grey show proteins meeting our exclusion criteria (nominal p-value ≥ 0.05). Colored labels point at protein landmarks of Hallmark pathways significantly regulated in activated EC. **(f)** ORA enrichment terms in a GO computational framework. **(g)** GSEA (Hallmark) annotations according to the main function of significantly altered protein hubs. Source data are provided as a **Source data file**.

**Supplementary Figure S8.** In bulk adipose tissue before-after surgery-induced weight loss, **(a)** number of identified protein groups per sample after filtering out peptides without replication within subgroups and proteins with less than 2 peptides. **(b)** Plotted Log2-scale intensities (log2maxlfq). **(c)** Hierarchical clustering of proteins abundance (in rows) for each sample (in columns). **(d)** GSEA of proteomic results and pathway interpretation according to the Reactome database by comparing post-weight loss proteomes with baseline proteomes.

**Supplementary Figure S9.** Integrative heatmap of lipidomic results including lipids that were conjointly regulated in two or more of our experimental approaches, i.e., **(a)** in vitro (inflamed adipocyte cultures), **(b)** ex vivo (“obese” vs “lean” adipocytes), and/or **(c)** in vivo (bulk adipose tissue after successful weight loss).

**Supplementary Figure S10.** Flowchart study design diagram showing **(a)** results in adipocytes and bulk adipose tissue, and **(b)** gene candidate confirmation in bulk adipose tissue transcriptomes from three large cross-sectional datasets (METSIM, Finish Twin Cohort, and ADIPOMIT). Red squares depict proteins/genes increased. Blue squares for proteins/genes decreased.

**Supplementary Figure S11.** Flowchart study design diagram showing **(a)** proteomic results in adipose microvascular EC and HAMEC cultures when challenged with MCM and ACM. Then, gene candidates were leveraged with multiple pre-post surgery induced weight loss transcriptomes in bulk fat, filtered and merged with those from adipocyte proteomes. **(b)** Gene candidate-metabolic trait assessment was conducted by means of ssGSEA, ROC analyses, and machine learning in ADIPOMIT and KOBS cross-sectional transcriptomes. Red squares depict proteins/genes increased. Blue squares for proteins/genes decreased.

**Supplementary Figure S12. (a)** Integration of protein datasets obtained in ex vivo isolated “obese” vs “lean” adipose-resident EC and in vitro cultures of MCM and ACM-activated HAMEC when compared to control. **(b)** GO annotations of genes highlighted during our research (32) revealed regulation of several ribosomal components, and translation-related and biosynthetic processes. **(c)** Gene concept network depicting the relationship within these 32 genes/proteins. The Markov Cluster Algorithm (MCL) was used to find natural clusters based on the stochastic flow (inflation parameter: 3). Pathways with the same color correspond to the same cluster. Line thickness indicates the strength of data support. Dotted lines show edges between clusters. **(d)** The violin plot shows the ability of this EC-specific gene cluster in segregating “healthy” (HO) and “unhealthy” (UO) obesity. Group 1 to 3 indicate the number of metabolic comorbidities (i.e., dyslipidemia, hypertriglyceridemia, and/or hyperglycemia) observed, together with obesity in the ADIPOMIT cohort. **(e)** Combination of adipocyte and adipose-resident EC-specific protein biomarkers, as assessed after meta-analysis and translational cross-evaluation. Notably, only Thrombospondin 1 (THBS1) and Biphenyl hydrolase like (BPHL) proteins were underlined in adipocytes and EC samples.

**Supplementary Figure S13.** Bar plots feature variable importance rankings across 6 machine learning algorithms (i.e., logistic regression, random forest, decision tree, support vector machine (SVM), LightGBM, and XGBoost) for the diagnosis of obesity-related disturbances and “healthy” (HO) and “unhealthy” (UO) obesity in **(a)** ADIPOMIT and **(b)** KOBS. Each bar represents the normalized score assigned to a given variable within each model. Labels in blue for EC-derived genes. Below, **(c)** Venn diagrams depict gene coincidences across datasets and algorithms taken two-by-two (i.e., logistic regression and random forest, decision tree and SVM, and LightGBM and XGBoost). Source data are provided as a **Source data file**.
